# Supplementary material for: Accelerating discovery through integration: a DFT validated machine learning framework for screening MOF photocatalysts
Source: Royal Society of Chemistry journal article supplement (doi:10.1039/d5ta08107f), 2026-01-01
Supplement: d5ta08107f2.xlsx [file d5ta08107f2.xlsx]

## Sheet: Hybrids
qmof_id	name	formula	EA	IP	Bandgap	HOMO	LUMO	natoms	source			Criteria			SELECTOR (CH4)	SELECTOR (CH3OH)	SELECTOR (HCOOH)
qmof-019ba28	ABALOF_FSR	Cu12C36H56I16N4S4	3.06684	5.37039	2.30355	1.4111	3.71465	128	CSD			eV	Reduction Reaction		FALSE	FALSE	FALSE
qmof-61fda9f	ABIFAT01_FSR	Mn2C36H32N4O12	2.1435	4.91098	2.76748	0.190285	2.95777	86	CSD			JMCA, 2015, 3, 23458 (Hamad et. al.) [vacuum scale)			FALSE	FALSE	FALSE
qmof-34d7993	ABOTUJ_FSR	Cu4C28H36N12O4S4	2.35099	5.70193	3.35094	-0.486553	2.86438	88	CSD			-5.67	H2O -> O2		FALSE	FALSE	FALSE
qmof-d529df5	ABPZCU01_FSR	Cu2C20H24N4O12S2	2.91131	6.84108	3.92977	-1.08466	2.84511	64	CSD			-3.79	CO2 -> CH4		FALSE	FALSE	FALSE
qmof-868b2eb	ACAFIT_FSR	Cu2C20H16I2N4S4	2.47513	5.04601	2.57088	0.152649	2.72353	48	CSD			-3.65	CO2 -> CH3OH		FALSE	FALSE	FALSE
qmof-9ceb223	ACIPEJ_FSR	CuPdC24H32N12	2.88985	7.08754	4.19768	-1.5735	2.62418	70	CSD			-3.42	CO2 -> HCOOH		FALSE	FALSE	FALSE
qmof-1d25033	ADEGAU_FSR	MnNiC18H18N6O2	2.45232	6.00416	3.55184	-0.364866	3.18697	46	CSD			Chem Soc Rev, 2014, 43, 7963 (Rongé et. al.) [vs NHE]			FALSE	FALSE	FALSE
qmof-51b139b	ADIQAH_FSR	Cu2C32H24N4O8	2.66516	6.05928	3.39412	-1.99943	1.39469	70	CSD			0.81	2H2O -> O2 + 4H + 4e		FALSE	FALSE	FALSE
qmof-fb7f2ef	ADIQEL_FSR	Co2C32H24N4O8	2.15179	5.28332	3.13152	-1.01529	2.11623	70	CSD			-0.61	CO2 + 2H + 2e -> HCOOH		FALSE	FALSE	FALSE
qmof-d55908c	ADULIX_FSR	Cu20Pr8C168H128I16N28O64	2.60834	5.10954	2.5012	-0.061132	2.44007	432	CSD			-0.53	CO2 + 2H + 2e -> CO + H2O		FALSE	FALSE	FALSE
qmof-5d009d5	ADUVAX_FSR	Co4C56Cl8H56N16	2.27816	6.86218	4.58403	-1.36864	3.21539	140	CSD			-0.48	CO2 + 4H + 4e -> H2CO + H2O		FALSE	FALSE	FALSE
qmof-c939f55	AFUDUA_FSR	Cu4C24H24I4N4S2	2.94082	5.5455	2.60468	1.46276	4.06744	62	CSD			-0.38	CO2 + 6H + 6e -> CH3OH + H2O		FALSE	FALSE	FALSE
qmof-8f721fc	AFUQIB_FSR	Cu2C36H26N6O8	2.80486	6.13043	3.32558	-0.590679	2.7349	78	CSD			-0.24	CO2 + 8H + 8e -> CH4 + 2H2O		FALSE	FALSE	FALSE
qmof-0b3d138	AGIJUW_FSR	Cu4C40H64N8O16	2.23243	6.0855	3.85307	-1.14063	2.71244	132	CSD						FALSE	FALSE	FALSE
qmof-5718ab1	AGIKAD_FSR	Cu2C20H32N4O8	2.40122	6.22048	3.81926	-1.04966	2.7696	66	CSD						FALSE	FALSE	FALSE
qmof-f0bdd71	AGIMOU_FSR	Mn6C8Cl4H24N40O4	1.94532	5.71527	3.76996	-0.43146	3.3385	86	CSD						FALSE	FALSE	FALSE
qmof-7a182f0	AGOWUO_FSR	Ni4C96H144N24O16	2.41469	5.69091	3.27622	-0.645432	2.63079	284	CSD						FALSE	FALSE	FALSE
qmof-afc3059	AGOXAX_FSR	Cu2C24H20O12	3.49373	6.36556	2.87183	-0.289295	2.58254	58	CSD						FALSE	FALSE	FALSE
qmof-61282f6	AGUTEC_FSR	Cd2Cu2Br8C16H28N24O6	2.72555	6.39262	3.66707	-1.68282	1.98425	86	CSD						FALSE	FALSE	FALSE
qmof-225c8dd	AGUYEG_FSR	Cu4Mo8C46H36N12O26	4.14986	6.28765	2.1378	0.703054	2.84085	132	CSD						FALSE	FALSE	FALSE
qmof-e2e9e5f	AHADUJ_FSR	Co4C72H68N16O16	1.79173	5.86773	4.076	-1.40096	2.67504	176	CSD						FALSE	FALSE	FALSE
qmof-f848e64	AHAFAR_FSR	Co4C72H68N16O16	1.75392	6.07541	4.32149	-1.45759	2.8639	176	CSD						FALSE	FALSE	FALSE
qmof-89fb1f3	AHELAC_FSR	Mg4Ni4C96H72N16O36	3.4183	5.96309	2.54479	-0.563297	1.98149	228	CSD						FALSE	FALSE	FALSE
qmof-05279d0	AHOBAB_FSR	Mn4C28H24N16O8	2.37371	5.71258	3.33886	0.810493	4.14935	80	CSD						FALSE	FALSE	FALSE
qmof-ad02239	AHOMOB01_FSR	Zn4C52H36N12O16	4.06246	6.09937	2.03691	-2.39155	-0.354642	120	CSD						FALSE	FALSE	FALSE
qmof-6729ffe	AHUVOP_FSR	Cu4C24H20N8O8	3.45034	5.70855	2.25821	0.660785	2.919	64	CSD						TRUE	TRUE	FALSE
qmof-e2e9016	AJAXOY_FSR	Mg4C32H24O20	3.73798	5.62386	1.88588	0.101863	1.98774	80	CSD						FALSE	FALSE	FALSE
qmof-7b0b569	AJEWUH_FSR	Ni2C36H24N4O8	2.94385	6.03003	3.08619	-0.896035	2.19015	74	CSD						FALSE	FALSE	FALSE
qmof-5c0fddb	AJIQER_FSR	Co2C52H40N8O14	2.76647	6.24276	3.47629	-0.740672	2.73562	116	CSD						FALSE	FALSE	FALSE
qmof-6da396d	AJUNOK_FSR	Cd8C192H112N32O32S8	3.29502	5.83979	2.54477	-1.97567	0.569103	384	CSD						FALSE	FALSE	FALSE
qmof-1a90743	AKAPUX_FSR	Cu4C24Cl4H32N8	2.64663	4.902	2.25537	0.533659	2.78903	72	CSD						FALSE	FALSE	FALSE
qmof-76ab95c	AKAQAE_FSR	Cu6C24Cl6H32N8	3.31908	5.65729	2.33821	0.3901	2.72831	76	CSD						FALSE	FALSE	FALSE
qmof-4b9ff08	AKAQEI_FSR	Cu8C24Cl8H32N8	2.76969	5.05329	2.2836	1.01354	3.29714	80	CSD						FALSE	FALSE	FALSE
qmof-3d4b29f	AKAREJ01_FSR	Co2C22H18N8O8	2.88916	6.82926	3.94011	-1.00276	2.93735	58	CSD						FALSE	FALSE	FALSE
qmof-6585ef5	AKAYIV_FSR	Cu8Br8C192H120N24O48	3.23503	5.31752	2.08248	-1.64627	0.436214	400	CSD						FALSE	FALSE	FALSE
qmof-1072fba	AKEGON_FSR	Mn2C20H16O12	2.76631	5.70142	2.93511	-0.221034	2.71407	50	CSD						FALSE	FALSE	FALSE
qmof-1265040	AKIQIU01_FSR	Co2C32H28N4O10	2.53745	5.32792	2.79047	-0.023974	2.76649	76	CSD						FALSE	FALSE	FALSE
qmof-002580c	AKUWIO_FSR	Co2C32H32N8O8	2.2045	6.28409	4.07959	-1.18729	2.8923	82	CSD						FALSE	FALSE	FALSE
qmof-7c5f404	ALAJEE_FSR	Cu4C40H28N28O4	3.10024	6.7161	3.61585	-1.47676	2.1391	104	CSD						FALSE	FALSE	FALSE
qmof-7bcba44	ALIDAB_FSR	Cu2V2C34H24N4O14P2	3.05239	6.82933	3.77694	-0.573459	3.20348	82	CSD						FALSE	FALSE	FALSE
qmof-afb7457	ALONOE_FSR	V8C72H48N12O36	3.95368	6.21885	2.26517	-1.28764	0.977533	176	CSD						FALSE	FALSE	FALSE
qmof-0505344	ALOWAA_FSR	Ag8Mo8C20H12N24O26	3.82169	6.21786	2.39617	1.46266	3.85883	98	CSD						FALSE	FALSE	FALSE
qmof-c605c0a	AMAQAG02_FSR	Ni2C38H34N6O8	2.23693	5.94253	3.7056	-2.00414	1.70146	88	CSD						FALSE	FALSE	FALSE
qmof-4dbdf12	AMIHOV01_FSR	FeNiC12Cl2H6N8	4.14242	6.86783	2.72542	0.221712	2.94713	30	CSD						FALSE	FALSE	FALSE
qmof-7df997f	AMIPUJ_FSR	CuC28H18N8O4	2.8875	6.00434	3.11684	-0.500604	2.61624	59	CSD						FALSE	FALSE	FALSE
qmof-83de5c7	ANAGUS_FSR	Ag4C96H68N8O16	3.76359	6.39925	2.63566	-1.47555	1.16012	192	CSD						FALSE	FALSE	FALSE
qmof-8fa9c85	ANEQAN_FSR	Co2C44Cl4H32N8O8	1.91204	6.0678	4.15576	-0.630903	3.52485	98	CSD						FALSE	FALSE	FALSE
qmof-f441841	ANIQOE_FSR	Cu2C32H28N4O12	2.66348	6.46613	3.80265	-1.08454	2.7181	78	CSD						FALSE	FALSE	FALSE
qmof-a715883	ANIYUS_FSR	Cu2C16H20O20	4.23198	8.37886	4.14689	-2.42342	1.72346	58	CSD						FALSE	FALSE	FALSE
qmof-b2a8e0e	AQOFOC_FSR	Cu2C18H24N12O8	2.69285	6.81799	4.12514	-1.57796	2.54718	64	CSD						FALSE	FALSE	FALSE
qmof-dd76d21	AQOXAG_FSR	Cu4C24Cl16H32O40S8	3.25301	6.87478	3.62178	-0.042272	3.5795	124	CSD						FALSE	FALSE	FALSE
qmof-45649ec	AQUQUZ_FSR	Mo8NiC48H42N16O26	2.85843	6.03496	3.17654	-0.111251	3.06529	141	CSD						FALSE	FALSE	FALSE
qmof-2943f96	AROTAD_FSR	Cu2C34H28N4O14	3.07489	7.03194	3.95705	-1.13875	2.8183	82	CSD						FALSE	FALSE	FALSE
qmof-be1b006	AROTEH_FSR	Cu2C14H16O18	3.57777	7.38069	3.80292	-1.06915	2.73377	50	CSD						FALSE	FALSE	FALSE
qmof-b89c781	ASACAZ_FSR	Mn8C40H40O48	3.05623	5.97908	2.92285	0.317079	3.23993	136	CSD						FALSE	FALSE	FALSE
qmof-2bb9974	ASEWUQ_FSR	V4C24Cl12H20N4	4.65361	6.77165	2.11804	-0.236696	1.88134	64	CSD						FALSE	FALSE	FALSE
qmof-be2d371	ASOGEW_FSR	Co2C54Cl2H36N2O12S2	3.26441	5.60209	2.33769	0.340143	2.67783	110	CSD						FALSE	FALSE	FALSE
qmof-e4633f0	ASUGOK_FSR	Cu4C80H56N8O20	4.26434	6.69425	2.42991	-1.77121	0.658694	168	CSD						FALSE	FALSE	FALSE
qmof-6815e74	ASUQAI01_FSR	Cu2C20H18I2N2	2.65583	4.8413	2.18547	1.16752	3.353	44	CSD						FALSE	FALSE	FALSE
qmof-ab89669	AVONEG_FSR	Cd4C52H48N24O12	2.79336	4.9789	2.18554	0.356167	2.5417	140	CSD						FALSE	FALSE	FALSE
qmof-d42765b	AVUJEH_FSR	Cu2C52H40N12O8	2.83391	6.03606	3.20215	-0.834331	2.36782	114	CSD						FALSE	FALSE	FALSE
qmof-bd41929	AWIJUN02_FSR	CuC40H28N4O8	3.14037	6.74852	3.60815	-1.07873	2.52942	81	CSD						FALSE	FALSE	FALSE
qmof-cff9a36	AWODOG_FSR	Cu2C28H24N8O8	1.96478	5.80941	3.84462	-0.84807	2.99655	70	CSD						FALSE	FALSE	FALSE
qmof-e4f97d4	AWOLAA_FSR	CoGd6C20H36N8O54S6	3.37387	6.96418	3.59032	0.295295	3.88561	131	CSD						FALSE	FALSE	FALSE
qmof-5a93d85	AWOVUE_FSR	Ag2C28H28N10O4	3.37236	5.9731	2.60074	-0.476007	2.12473	72	CSD						FALSE	FALSE	FALSE
qmof-aa662d6	AWOZOC_FSR	CoSm6C20H36N8O54S6	3.24833	6.80439	3.55606	0.264257	3.82032	131	CSD						FALSE	FALSE	FALSE
qmof-1b6c849	AXAQAT02_FSR	Ag2FeC8H4N6	3.55707	6.39204	2.83497	-1.15381	1.68116	21	CSD						FALSE	FALSE	FALSE
qmof-5947f65	AXIPEE03_FSR	Au8Fe4C72H40N32	2.79463	5.38834	2.59371	-2.1171	0.476605	156	CSD						FALSE	FALSE	FALSE
qmof-899ea4d	AXUPIU_FSR	Cu2C44H48N12O12	2.33971	6.25915	3.91944	-1.15182	2.76762	118	CSD						FALSE	FALSE	FALSE
qmof-c8f0292	AXUPUG_FSR	Co2C44H48N12O12	2.1512	5.73112	3.57991	-0.296814	3.2831	118	CSD						FALSE	FALSE	FALSE
qmof-c430d7c	AYAYEG_FSR	Cu2C20H20N6O6	3.02931	6.14814	3.11884	-2.00514	1.1137	54	CSD						FALSE	FALSE	FALSE
qmof-04459f0	AZIROQ_FSR	Zn4C60H60N8O12	3.36158	5.73155	2.36998	-0.603991	1.76598	144	CSD						TRUE	TRUE	TRUE
qmof-52cac05	AZOSAJ_FSR	Mo4C60H48N8O12S8	3.96345	5.90463	1.94118	-0.083236	1.85794	140	CSD						FALSE	FALSE	FALSE
qmof-1fe6988	BACMOH10_FSR	Cu4C28H36N12O16	2.89072	6.65908	3.76837	-1.87247	1.89589	96	CSD						FALSE	FALSE	FALSE
qmof-ad06ef4	BAGNEF_FSR	Cu2C20H14N10O12	3.20771	6.83212	3.62441	-2.11677	1.50764	58	CSD						FALSE	FALSE	FALSE
qmof-0cfad40	BAGPOP01_FSR	Cu2C28H16N16	2.7443	6.25332	3.50902	-0.999687	2.50934	62	CSD						FALSE	FALSE	FALSE
qmof-c7fd3ba	BAHGUN01_FSR	Cu2C24H16N4O8	2.65494	6.73019	4.07525	-2.07462	2.00063	54	CSD						FALSE	FALSE	FALSE
qmof-1fd65b5	BAHNUW_FSR	Ag2C52H46N12O8S2	3.96643	5.7766	1.81016	-0.406722	1.40344	122	CSD						FALSE	FALSE	FALSE
qmof-ed9a745	BAKXOC_FSR	Co2Br2C42H34N4O8	1.4735	4.85982	3.38632	-0.130743	3.25558	92	CSD						FALSE	FALSE	FALSE
qmof-bd93f70	BALZAS_FSR	Cu2C44H44N8O12	2.52849	5.95489	3.4264	-0.760691	2.66571	110	CSD						FALSE	FALSE	FALSE
qmof-0122bb1	BAMSEN_FSR	GaC32FH16N8	3.05015	4.25802	1.20787	0.705751	1.91362	58	CSD						FALSE	FALSE	FALSE
qmof-3c5b84b	BANYUN_FSR	Co2C52Cl4H40N8O8	2.85347	6.43865	3.58518	-0.54292	3.04226	114	CSD						FALSE	FALSE	FALSE
qmof-5cf14ed	BAQRIX_FSR	Cu2C56H48N20O10	2.50354	6.29949	3.79595	-1.14401	2.65194	136	CSD						FALSE	FALSE	FALSE
qmof-8030fac	BATVAW_FSR	CuC12H12N2O8	3.13437	6.60708	3.47272	-0.311236	3.16148	35	CSD						FALSE	FALSE	FALSE
qmof-e7b6156	BAVKIS_FSR	Hg3C6Cl6H8S4	3.22458	5.29841	2.07382	0.992971	3.06679	27	CSD						FALSE	FALSE	FALSE
qmof-42b6f78	BAVSOJ_FSR	Zn8C104H96N16O40	3.37509	5.55155	2.17646	-0.696658	1.4798	264	CSD						FALSE	FALSE	FALSE
qmof-e2b0729	BAXPOG_FSR	Hg2Br4C54H36N4O2	4.00234	5.73199	1.72964	-0.626669	1.10297	102	CSD						FALSE	FALSE	FALSE
qmof-04b3678	BAYTEB_FSR	CoC18H14N8O4	2.48387	6.11645	3.63258	-0.759524	2.87305	45	CSD						FALSE	FALSE	FALSE
qmof-324fde1	BEBCOB_FSR	Cu2C44H24N4O16	3.38443	6.90428	3.51985	-0.723699	2.79615	90	CSD						FALSE	FALSE	FALSE
qmof-47eb3b5	BENJAH_FSR	Cu2C32H24N4O12	3.4187	6.18349	2.7648	-0.792672	1.97212	74	CSD						FALSE	FALSE	FALSE
qmof-2c7d021	BESFUD_FSR	Cu2C36H32N4O12	2.34645	6.31841	3.97197	-1.57326	2.3987	86	CSD						FALSE	FALSE	FALSE
qmof-fae8514	BIBBAR_FSR	Ni4B4C84H124N24O16	1.72867	6.0104	4.28173	-1.35745	2.92428	256	CSD						FALSE	FALSE	FALSE
qmof-817fdc2	BIFYEW_FSR	Ni2C36H36N4O12P4	2.34823	5.09271	2.74448	0.228397	2.97288	94	CSD						FALSE	FALSE	FALSE
qmof-e986fdb	BIFYIA_FSR	Ni2C40H36N4O12P4	2.17536	5.45706	3.2817	-0.339981	2.94172	98	CSD						FALSE	FALSE	FALSE
qmof-7e9d037	BIFZAT_FSR	Ni2C40H36N6O12P4	3.64464	6.13289	2.48825	-0.61801	1.87024	100	CSD						TRUE	TRUE	FALSE
qmof-8c3c946	BIGDIF_FSR	CuC8H10N2O4	2.51732	6.47642	3.95911	-0.960623	2.99848	25	CSD						FALSE	FALSE	FALSE
qmof-1fa8bff	BIHLUB_FSR	Ca2Cu2C22H36N4O24S2	2.65966	6.03846	3.3788	-0.711112	2.66769	92	CSD						FALSE	FALSE	FALSE
qmof-86d21dc	BIHMEM_FSR	Ba2Cu2C22H32N4O22S2	2.69105	6.22093	3.52988	-0.257648	3.27223	86	CSD						FALSE	FALSE	FALSE
qmof-4b4c416	BIJQER_FSR	Cu16C40H32I16N8	2.24822	4.20533	1.9571	2.32541	4.28251	112	CSD						FALSE	FALSE	FALSE
qmof-a4ece54	BIJXUP_FSR	Cu2C14H14I2N4	2.49361	4.84292	2.34931	0.960935	3.31025	36	CSD						FALSE	FALSE	FALSE
qmof-55f4d83	BIPCOU_FSR	Cu2C38H30N6O18S2	3.21044	7.22001	4.00957	-1.34642	2.66315	96	CSD						FALSE	FALSE	FALSE
qmof-8bc481b	BIQZEG_FSR	Cu2C32H24N4O8S2	2.54409	6.60958	4.06549	-1.04936	3.01613	72	CSD						FALSE	FALSE	FALSE
qmof-24cd035	BIVPUU_FSR	Cu2C24H20N20	3.39806	7.28558	3.88752	-1.13841	2.74911	66	CSD						FALSE	FALSE	FALSE
qmof-ef047dc	BIWWOW_FSR	Cu4La8C128H112N8O76S16	2.56523	6.48498	3.91974	-1.71967	2.20008	352	CSD						FALSE	FALSE	FALSE
qmof-9aa7703	BOCXUO_FSR	Ni3C36H30N12S6	2.40703	5.77503	3.368	0.016865	3.38487	87	CSD						FALSE	FALSE	FALSE
qmof-6842f7a	BOFGUZ_FSR	Cu8Zn8C104H64N16O48	3.5467	6.01073	2.46404	-0.887613	1.57642	248	CSD						TRUE	TRUE	FALSE
qmof-cebd596	BOJKAM09_FSR	Ni4C16H36N4O24	2.37294	6.9134	4.54046	-1.09576	3.4447	84	CSD						FALSE	FALSE	FALSE
qmof-6c0ffdd	BOKSOK_FSR	Fe2C52H36N20S4	2.20453	5.09801	2.89348	0.322692	3.21617	114	CSD						FALSE	FALSE	FALSE
qmof-3356268	BONWEH_FSR	Zn8C72H56N8O40	4.4597	7.32427	2.86457	-1.40728	1.45729	184	CSD						FALSE	FALSE	FALSE
qmof-dbaf834	BOPCIT_FSR	MgC30F2H26N2O10	3.18114	5.89831	2.71717	-0.427767	2.2894	71	CSD						FALSE	FALSE	FALSE
qmof-46324de	BOVTAH02_FSR	Cu4C20H28O28	3.02498	6.85976	3.83479	-2.0965	1.73829	80	CSD						FALSE	FALSE	FALSE
qmof-6db07a6	BOXCEY_FSR	Cu2C56H42I2N6Si2	2.5801	4.72016	2.14006	-0.244261	1.8958	110	CSD						FALSE	FALSE	FALSE
qmof-fd0958d	BOXMUY_FSR	Cu2Sr2C28H12N4O16	3.55169	7.31536	3.76367	-1.06072	2.70295	64	CSD						FALSE	FALSE	FALSE
qmof-727c9e2	BOXNAF02_FSR	Cu2Sr2C28H32N4O26	2.84176	6.947	4.10525	-1.36194	2.74331	94	CSD						FALSE	FALSE	FALSE
qmof-3010cb1	boydwoo_str_m1_o11_o15_pcu_sym_102	Zn8C61H58O31	3.36968	5.61075	2.24107	-3.73594	-1.49487	158	BoydWoo						FALSE	FALSE	FALSE
qmof-e57e5bf	boydwoo_str_m1_o11_o22_pcu_sym_162	Zn8C49H32O44	3.94835	6.60392	2.65558	-4.75767	-2.10209	133	BoydWoo						FALSE	FALSE	FALSE
qmof-a342218	boydwoo_str_m1_o11_o22_pcu_sym_96	Zn8C56H32O42	4.42406	7.29985	2.87579	-5.22212	-2.34633	138	BoydWoo						FALSE	FALSE	FALSE
qmof-ed6a1d6	boydwoo_str_m1_o12_o12_pcu_sym_174	Zn4C22H8N4O17	4.50768	6.8074	2.29972	-4.94253	-2.64282	55	BoydWoo						FALSE	FALSE	FALSE
qmof-2bf6c21	boydwoo_str_m1_o12_o18_pcu_sym_20	Zn4C34ClH23N2O13	3.22638	5.23383	2.00745	-3.57033	-1.56288	77	BoydWoo						FALSE	FALSE	FALSE
qmof-c67339d	boydwoo_str_m1_o12_o21_pcu_sym_131	Zn4C24H10O18	4.3434	6.7003	2.3569	-5.26096	-2.90406	56	BoydWoo						FALSE	FALSE	FALSE
qmof-0fe96c4	boydwoo_str_m1_o13_o13_pcu_sym_138	Zn8C82H36O60	3.55027	5.63332	2.08306	-3.90726	-1.8242	186	BoydWoo						FALSE	FALSE	FALSE
qmof-d38bd9e	boydwoo_str_m1_o13_o13_pcu_sym_201	Zn8C72Cl20H16O62S12	4.84156	6.73164	1.89009	-3.96013	-2.07004	190	BoydWoo						FALSE	FALSE	FALSE
qmof-3168ba7	boydwoo_str_m1_o18_o21_pcu_sym_76	Zn4C64H55NO18	3.24501	5.25268	2.00767	-3.55252	-1.54485	142	BoydWoo						FALSE	FALSE	FALSE
qmof-e9ceb52	boydwoo_str_m1_o4_o9_pcu_sym_213	Zn8C70F13H37N8O26	3.4194	5.31754	1.89814	-3.07331	-1.17517	162	BoydWoo						FALSE	FALSE	FALSE
qmof-cda8e7d	boydwoo_str_m1_o5_o17_pcu_sym_39	Zn8C52Cl8H8O34	3.70544	5.6229	1.91746	-3.43515	-1.51769	110	BoydWoo						FALSE	FALSE	FALSE
qmof-6bca146	boydwoo_str_m1_o8_o10_pcu_sym_78	Zn4C32H18N4O34S7	4.75136	7.56196	2.81061	-5.40318	-2.59257	99	BoydWoo						FALSE	FALSE	FALSE
qmof-72a3c74	boydwoo_str_m1_o8_o10_pcu_sym_87	Zn4C53H50N4O23	3.81515	6.33251	2.51737	-4.47194	-1.95457	134	BoydWoo						FALSE	FALSE	FALSE
qmof-dcf8019	boydwoo_str_m1_o8_o10_pcu_sym_91	Zn4C32H18N4O23	3.98411	6.04739	2.06328	-4.73577	-2.6725	81	BoydWoo						FALSE	FALSE	FALSE
qmof-270bfcd	boydwoo_str_m1_o8_o12_pcu_sym_43	Zn4C37H16I4N4O16	3.81513	6.38782	2.57269	-5.03182	-2.45914	81	BoydWoo						FALSE	FALSE	FALSE
qmof-ddab43b	boydwoo_str_m1_o8_o16_pcu_sym_250	Zn4C49H29N9O23	3.592	5.37098	1.77899	-4.1396	-2.36062	114	BoydWoo						FALSE	FALSE	FALSE
qmof-861ea4a	boydwoo_str_m1_o8_o18_pcu_sym_201	Zn4C57H44N4O20	3.56095	5.64916	2.08821	-4.50804	-2.41983	129	BoydWoo						FALSE	FALSE	FALSE
qmof-2155e19	boydwoo_str_m1_o8_o18_pcu_sym_280	Zn4C53H49N17O13	2.87291	4.74166	1.86875	-3.62157	-1.75282	136	BoydWoo						FALSE	FALSE	FALSE
qmof-dc2dcc2	boydwoo_str_m1_o8_o18_pcu_sym_32	Zn4C60H50N4O19	3.20435	5.65646	2.4521	-4.60061	-2.14851	137	BoydWoo						FALSE	FALSE	FALSE
qmof-c650339	boydwoo_str_m1_o9_o11_pcu_sym_64	Zn8C90H66N2O31	3.70836	5.72545	2.01709	-3.39259	-1.3755	197	BoydWoo						TRUE	FALSE	FALSE
qmof-df4f7aa	boydwoo_str_m3_o1_o11_nbo_sym_147	Zn6C58H60N12O33	2.54785	4.69186	2.14401	-2.95317	-0.809165	169	BoydWoo						FALSE	FALSE	FALSE
qmof-9be2d4c	boydwoo_str_m3_o1_o12_pcu_sym_42	Zn2C24F2H28N8O8	2.99322	5.04716	2.05394	-1.74221	0.311735	72	BoydWoo						FALSE	FALSE	FALSE
qmof-260d2c2	boydwoo_str_m3_o1_o14_pcu_sym_203	Zn2C24H10I4N2O8	3.88635	6.29548	2.40914	-2.42072	-0.011581	50	BoydWoo						FALSE	FALSE	FALSE
qmof-1c25053	boydwoo_str_m3_o1_o14_pcu_sym_230	Zn2C24H14N10O16	3.82541	6.01233	2.18692	-2.33494	-0.148022	66	BoydWoo						FALSE	FALSE	FALSE
qmof-ae3b943	boydwoo_str_m3_o1_o17_pcu_sym_158	Zn2Br2C42H22N2O8	3.79453	5.91684	2.1223	-2.75141	-0.629112	78	BoydWoo						FALSE	FALSE	FALSE
qmof-0625810	boydwoo_str_m3_o1_o20_pcu_sym_40	Zn2C20F4H4N2O8	4.46744	6.79348	2.32604	-4.9048	-2.57876	40	BoydWoo						FALSE	FALSE	FALSE
qmof-0e27a4a	boydwoo_str_m3_o1_o22_pcu_sym_5	Zn2C24Cl4H22N4O8	3.58866	5.98299	2.39432	-2.55589	-0.161569	64	BoydWoo						TRUE	TRUE	FALSE
qmof-53530b6	boydwoo_str_m3_o1_o24_nbo_sym_62	Zn6C51H28N2O26	3.2565	5.59789	2.34139	-4.22329	-1.8819	113	BoydWoo						FALSE	FALSE	FALSE
qmof-8b79c84	boydwoo_str_m3_o1_o24_pcu_sym_31	Zn2C34H38N2O10	3.32977	5.70031	2.37054	-2.30492	0.065616	86	BoydWoo						TRUE	TRUE	TRUE
qmof-541d78e	boydwoo_str_m3_o1_o26_pcu_sym_210	Zn2C40H48N8O8	3.03374	5.20228	2.16855	-2.08049	0.088056	106	BoydWoo						FALSE	FALSE	FALSE
qmof-2ae9d62	boydwoo_str_m3_o1_o27_pcu_sym_127	Zn2C28H16N6O20S4	4.3327	7.49185	3.15915	-4.50582	-1.34668	76	BoydWoo						FALSE	FALSE	FALSE
qmof-41141ee	boydwoo_str_m3_o1_o29_pcu_sym_111	Zn2C54H36N8O12	4.13846	5.87031	1.73185	-3.5095	-1.77765	112	BoydWoo						FALSE	FALSE	FALSE
qmof-e3a2152	boydwoo_str_m3_o1_o29_pcu_sym_66	Zn2C54H32N4O14	4.41487	6.4382	2.02333	-4.1812	-2.15787	106	BoydWoo						FALSE	FALSE	FALSE
qmof-7f07a21	boydwoo_str_m3_o1_o29_pcu_sym_7	Zn2C62H48N4O16	4.53082	6.56031	2.02949	-3.81701	-1.78752	132	BoydWoo						FALSE	FALSE	FALSE
qmof-b1b05e2	boydwoo_str_m3_o1_o4_pcu_sym_238	Zn2C30H24N8O24	4.61714	7.21816	2.60102	-2.7169	-0.115876	88	BoydWoo						FALSE	FALSE	FALSE
qmof-08a6002	boydwoo_str_m3_o1_o4_pcu_sym_24	Zn2C22H10N6O16	4.79449	7.36336	2.56886	-4.0976	-1.52874	56	BoydWoo						FALSE	FALSE	FALSE
qmof-4bdce90	boydwoo_str_m3_o1_o8_pcu_sym_63	Zn2C34Cl4H28N4O8	3.66021	6.40397	2.74376	-3.81898	-1.07523	80	BoydWoo						FALSE	FALSE	FALSE
qmof-23d6bfc	boydwoo_str_m3_o10_o13_pcu_sym_139	Zn2C16H8I2N2O8	4.09305	6.43042	2.33737	-2.87502	-0.537646	38	BoydWoo						FALSE	FALSE	FALSE
qmof-c7fdbb6	boydwoo_str_m3_o10_o13_pcu_sym_98	Zn2C18H10N2O10	4.00527	6.60933	2.60406	-3.33878	-0.734718	42	BoydWoo						FALSE	FALSE	FALSE
qmof-809fc5e	boydwoo_str_m3_o10_o16_pcu_sym_32	Zn2C20Cl3H9N2O8	3.87362	6.25809	2.38447	-1.89632	0.488152	44	BoydWoo						FALSE	FALSE	FALSE
qmof-b46b341	boydwoo_str_m3_o10_o16_pcu_sym_63	Zn2C21H12N2O12S	4.05076	6.36879	2.31804	-2.66202	-0.343983	50	BoydWoo						FALSE	FALSE	FALSE
qmof-9d7aabd	boydwoo_str_m3_o10_o17_pcu_sym_113	Zn2C26H20I4N6O8	4.90392	4.98526	0.081341	-0.252966	-0.171625	66	BoydWoo						FALSE	FALSE	FALSE
qmof-126dd4e	boydwoo_str_m3_o10_o21_pcu_sym_151	Zn2C14H8N8O16	4.5518	6.56996	2.01816	-3.12573	-1.10757	48	BoydWoo						FALSE	FALSE	FALSE
qmof-061695a	boydwoo_str_m3_o10_o23_pcu_sym_214	Zn2Br6C24H10N2O20	3.97711	6.96053	2.98342	-2.67249	0.31093	64	BoydWoo						FALSE	FALSE	FALSE
qmof-7c271cd	boydwoo_str_m3_o10_o23_pcu_sym_65	Zn2C21H22N2O11	3.72153	6.84817	3.12663	-3.87569	-0.74906	58	BoydWoo						FALSE	FALSE	FALSE
qmof-21f0ad6	boydwoo_str_m3_o10_o25_pcu_sym_124	Zn2C18F4H6N2O8	4.049	7.20553	3.15652	-4.60114	-1.44462	40	BoydWoo						FALSE	FALSE	FALSE
qmof-87274e3	boydwoo_str_m3_o10_o28_pcu_sym_104	Zn2C40H8I8N4O28	5.33026	7.22672	1.89646	-1.25948	0.636979	90	BoydWoo						FALSE	FALSE	FALSE
qmof-5ea3d58	boydwoo_str_m3_o10_o28_pcu_sym_5	Zn2C34Cl8H8N4O16	4.7782	7.32688	2.54867	-3.36804	-0.819367	72	BoydWoo						FALSE	FALSE	FALSE
qmof-2a66aa3	boydwoo_str_m3_o11_o11_pcu_sym_26	Zn2C19H12N2O18	4.48965	7.16013	2.67048	-4.26038	-1.5899	53	BoydWoo						FALSE	FALSE	FALSE
qmof-bab1656	boydwoo_str_m3_o11_o12_pcu_sym_260	Zn2C16FH15N2O8	3.71111	6.47267	2.76156	-4.51261	-1.75106	44	BoydWoo						FALSE	FALSE	FALSE
qmof-93bad37	boydwoo_str_m3_o11_o15_nbo_sym_94	Zn6C73H82O35	2.92529	4.9901	2.06481	-3.15911	-1.0943	196	BoydWoo						FALSE	FALSE	FALSE
qmof-1f248c3	boydwoo_str_m3_o11_o16_pcu_sym_105	Zn2C33H26N2O8	3.87738	6.03593	2.15856	-3.24187	-1.08331	71	BoydWoo						FALSE	FALSE	FALSE
qmof-063efc4	boydwoo_str_m3_o11_o16_pcu_sym_108	Zn2C30H28N2O10	3.53741	5.89882	2.3614	-2.97384	-0.612439	72	BoydWoo						TRUE	TRUE	FALSE
qmof-70c044b	boydwoo_str_m3_o11_o18_pcu_sym_143	Zn2C28H17N3O10	3.81126	6.06639	2.25512	-3.80074	-1.54561	60	BoydWoo						FALSE	FALSE	FALSE
qmof-158f8fd	boydwoo_str_m3_o11_o18_pcu_sym_16	Zn2C28H23N7O8	2.76767	4.99785	2.23019	-2.56266	-0.332475	68	BoydWoo						FALSE	FALSE	FALSE
qmof-8bfe542	boydwoo_str_m3_o11_o18_pcu_sym_36	Zn2C28H10I8N2O8	3.58298	5.98504	2.40206	-1.67556	0.726497	58	BoydWoo						TRUE	TRUE	FALSE
qmof-b8e941c	boydwoo_str_m3_o11_o19_pcu_sym_120	Zn2C14H5I3N2O8	4.15955	6.80791	2.64836	-4.42339	-1.77503	34	BoydWoo						FALSE	FALSE	FALSE
qmof-0cb7c52	boydwoo_str_m3_o11_o20_pcu_sym_99	Zn2C19H14N2O9	3.95598	6.54678	2.5908	-4.90993	-2.31914	46	BoydWoo						FALSE	FALSE	FALSE
qmof-c1bc002	boydwoo_str_m3_o11_o21_pcu_sym_32	Zn2C22H26I2N8O8	2.76918	4.93314	2.16396	-2.04333	0.120623	68	BoydWoo						FALSE	FALSE	FALSE
qmof-1f7e34d	boydwoo_str_m3_o11_o22_nbo_sym_137	Zn6C43H41N3O31	2.9992	5.30854	2.30934	-4.01622	-1.70687	124	BoydWoo						FALSE	FALSE	FALSE
qmof-83816cc	boydwoo_str_m3_o11_o22_pcu_sym_123	Zn2C20H18I6N2O8	4.04332	6.18777	2.14445	-1.90695	0.237496	56	BoydWoo						FALSE	FALSE	FALSE
qmof-15ff994	boydwoo_str_m3_o11_o22_pcu_sym_176	Zn2BrC18H19N2O8	3.75036	6.54162	2.79126	-4.36532	-1.57407	50	BoydWoo						FALSE	FALSE	FALSE
qmof-1ca8fd0	boydwoo_str_m3_o11_o22_pcu_sym_258	Zn2C19H20N2O10	3.97395	6.90171	2.92776	-4.49832	-1.57056	53	BoydWoo						FALSE	FALSE	FALSE
qmof-058b1bf	boydwoo_str_m3_o11_o23_pcu_sym_256	Zn2C31H38N2O11	3.82811	6.17111	2.343	-3.87388	-1.53089	84	BoydWoo						FALSE	FALSE	FALSE
qmof-b58e86f	boydwoo_str_m3_o11_o23_pcu_sym_76	Zn2C34H36N2O8	3.88354	6.33322	2.44967	-4.0977	-1.64802	82	BoydWoo						FALSE	FALSE	FALSE
qmof-201a359	boydwoo_str_m3_o11_o25_pcu_sym_16	Zn2C29H31N5O10	2.89764	5.3307	2.43306	-3.2734	-0.840342	77	BoydWoo						FALSE	FALSE	FALSE
qmof-517524d	boydwoo_str_m3_o11_o25_pcu_sym_68	Zn2C22H14N2O9	3.90888	6.58173	2.67284	-4.92117	-2.24833	49	BoydWoo						FALSE	FALSE	FALSE
qmof-cf29560	boydwoo_str_m3_o11_o25_pcu_sym_76	Zn2Br7C22H7N2O8	4.49577	6.84339	2.34762	-4.44932	-2.10171	48	BoydWoo						FALSE	FALSE	FALSE
qmof-540f79a	boydwoo_str_m3_o11_o27_pcu_sym_165	Zn2C24Cl6F7H3N6O8	4.41952	7.09246	2.67294	-4.71146	-2.03853	56	BoydWoo						FALSE	FALSE	FALSE
qmof-47efcfb	boydwoo_str_m3_o11_o27_pcu_sym_42	Zn2C44H28N6O12	3.81807	6.55758	2.7395	-3.9498	-1.21029	92	BoydWoo						FALSE	FALSE	FALSE
qmof-9c92284	boydwoo_str_m3_o11_o28_pcu_sym_222	Zn2C37H18N6O18	4.43259	6.76305	2.33045	-4.70365	-2.3732	81	BoydWoo						FALSE	FALSE	FALSE
qmof-add590e	boydwoo_str_m3_o11_o28_pcu_sym_242	Zn2C51H45I5N4O17	3.88773	5.68486	1.79713	-2.44568	-0.64855	124	BoydWoo						FALSE	FALSE	FALSE
qmof-0749ed8	boydwoo_str_m3_o12_o13_pcu_sym_106	Zn2C20H12I2N2O8	3.98416	6.37102	2.38686	-3.90257	-1.51571	46	BoydWoo						FALSE	FALSE	FALSE
qmof-60ca16f	boydwoo_str_m3_o12_o14_pcu_sym_106	Zn2C20H13IN2O8	4.16565	6.30373	2.13807	-3.49732	-1.35924	46	BoydWoo						FALSE	FALSE	FALSE
qmof-33426df	boydwoo_str_m3_o12_o15_pcu_sym_107	Zn2C26F8H12N2O8	3.82125	5.91904	2.09779	-2.91853	-0.82074	58	BoydWoo						FALSE	FALSE	FALSE
qmof-761ed66	boydwoo_str_m3_o12_o15_pcu_sym_70	Zn2Br6C24H8N4O12	4.23422	6.21675	1.98253	-2.45254	-0.470009	56	BoydWoo						FALSE	FALSE	FALSE
qmof-17a96f5	boydwoo_str_m3_o12_o16_pcu_sym_39	Zn2C29H33N9O13	2.73899	4.87256	2.13357	-1.67369	0.459884	86	BoydWoo						FALSE	FALSE	FALSE
qmof-1033c27	boydwoo_str_m3_o12_o16_pcu_sym_87	Zn2Br5C24H15N6O8	3.05481	5.51678	2.46197	-2.19398	0.267983	60	BoydWoo						FALSE	FALSE	FALSE
qmof-7705722	boydwoo_str_m3_o12_o19_pcu_sym_164	Zn2C16Cl2H6N2O12	4.87628	6.91748	2.0412	-4.49624	-2.45504	40	BoydWoo						FALSE	FALSE	FALSE
qmof-78cbecc	boydwoo_str_m3_o12_o19_pcu_sym_169	Zn2C14H4N6O22S2	5.31471	7.85317	2.53846	-4.42028	-1.88182	50	BoydWoo						FALSE	FALSE	FALSE
qmof-d32c5b6	boydwoo_str_m3_o12_o22_pcu_sym_155	Zn2C19H22N2O8	3.90244	6.53764	2.6352	-4.38503	-1.74984	53	BoydWoo						FALSE	FALSE	FALSE
qmof-e09709f	boydwoo_str_m3_o12_o23_pcu_sym_173	Zn2C25H28N4O9	3.26512	6.14514	2.88002	-4.23288	-1.35286	68	BoydWoo						FALSE	FALSE	FALSE
qmof-5e49283	boydwoo_str_m3_o12_o23_pcu_sym_60	Zn2C23FH19N2O10	4.08738	6.62876	2.54138	-4.86122	-2.31984	57	BoydWoo						FALSE	FALSE	FALSE
qmof-a74572e	boydwoo_str_m3_o12_o24_pcu_sym_121	Zn2Br8C18H6N2O8	4.54171	6.91755	2.37584	-3.21524	-0.839405	44	BoydWoo						FALSE	FALSE	FALSE
qmof-781949d	boydwoo_str_m3_o12_o25_pcu_sym_3	Zn2C40H48N4O18	3.6666	6.20148	2.53488	-2.87287	-0.33799	112	BoydWoo						FALSE	FALSE	FALSE
qmof-d4963a6	boydwoo_str_m3_o12_o28_pcu_sym_148	Zn2C42H32N4O14	4.18862	6.68103	2.4924	-4.66397	-2.17156	94	BoydWoo						FALSE	FALSE	FALSE
qmof-e58468d	boydwoo_str_m3_o12_o29_pcu_sym_123	Zn2C52H36N4O12	4.66225	6.6843	2.02205	-4.36855	-2.3465	106	BoydWoo						FALSE	FALSE	FALSE
qmof-0fb4c2f	boydwoo_str_m3_o12_o29_pcu_sym_142	Zn2C52H36N4O12	4.40968	6.43241	2.02273	-4.31487	-2.29213	106	BoydWoo						FALSE	FALSE	FALSE
qmof-051793e	boydwoo_str_m3_o13_o15_pcu_sym_193	Zn2C48H18I10N2O8	3.7048	5.67646	1.97166	0.589837	2.5615	88	BoydWoo						TRUE	FALSE	FALSE
qmof-d844aae	boydwoo_str_m3_o13_o16_pcu_sym_214	Zn2C46F5H35N2O8	3.61195	5.89535	2.2834	-2.93562	-0.652216	98	BoydWoo						TRUE	TRUE	FALSE
qmof-97bca44	boydwoo_str_m3_o13_o16_pcu_sym_94	Zn2Br2C37H21N3O8	3.28272	5.24738	1.96466	-2.81618	-0.851529	73	BoydWoo						FALSE	FALSE	FALSE
qmof-40fadd9	boydwoo_str_m3_o13_o17_pcu_sym_178	Zn2C40H20N2O10	3.48691	5.63341	2.14649	-3.7476	-1.60111	74	BoydWoo						FALSE	FALSE	FALSE
qmof-2b1d7b8	boydwoo_str_m3_o13_o17_pcu_sym_239	Zn2C38H20N2O16	3.4593	5.2253	1.76599	-3.28047	-1.51448	78	BoydWoo						FALSE	FALSE	FALSE
qmof-74256d1	boydwoo_str_m3_o13_o19_pcu_sym_27	Zn2Br4C28H8N2O12	4.23597	6.48443	2.24846	-4.16119	-1.91273	56	BoydWoo						FALSE	FALSE	FALSE
qmof-288d36e	boydwoo_str_m3_o13_o22_pcu_sym_144	Zn2C39H18I6N2O17	4.29001	6.87234	2.58233	-2.57317	0.009157	84	BoydWoo						FALSE	FALSE	FALSE
qmof-87b704c	boydwoo_str_m3_o13_o23_pcu_sym_126	Zn2C34Cl6F10H8N2O8	4.44709	6.48394	2.03685	-4.24655	-2.2097	70	BoydWoo						FALSE	FALSE	FALSE
qmof-b4a9394	boydwoo_str_m3_o13_o26_pcu_sym_246	Zn2C44H38N2O10	3.32694	5.49503	2.16809	-3.7358	-1.56771	96	BoydWoo						FALSE	FALSE	FALSE
qmof-69e96ed	boydwoo_str_m3_o13_o27_pcu_sym_81	Zn2C48H28N6O8	3.73376	6.28315	2.5494	-4.43783	-1.88843	92	BoydWoo						FALSE	FALSE	FALSE
qmof-4b9332b	boydwoo_str_m3_o13_o28_pcu_sym_76	Zn2C48H26N6O12	4.00275	5.7645	1.76175	-4.25542	-2.49367	94	BoydWoo						FALSE	FALSE	FALSE
qmof-1bdd4c5	boydwoo_str_m3_o14_o14_pcu_sym_17	Zn2C41H39N5O14	2.77501	4.87382	2.09881	-0.470006	1.6288	101	BoydWoo						FALSE	FALSE	FALSE
qmof-d74c3da	boydwoo_str_m3_o14_o14_pcu_sym_89	Zn2C44H24N8O8	4.59411	6.79726	2.20315	-2.19927	0.003882	86	BoydWoo						FALSE	FALSE	FALSE
qmof-3aa5315	boydwoo_str_m3_o14_o16_pcu_sym_13	Zn2C36Cl4H13I3N2O8	4.37943	6.32225	1.94282	-1.77474	0.168077	68	BoydWoo						FALSE	FALSE	FALSE
qmof-e17884e	boydwoo_str_m3_o14_o18_pcu_sym_32	Zn2C43H25N3O10	3.73948	5.9074	2.16792	-2.85269	-0.684771	83	BoydWoo						TRUE	FALSE	FALSE
qmof-5964493	boydwoo_str_m3_o14_o18_pcu_sym_59	Zn2C44F2H28N2O8	3.82624	5.72002	1.89378	-2.36311	-0.46933	86	BoydWoo						FALSE	FALSE	FALSE
qmof-56a4d8e	boydwoo_str_m3_o14_o19_pcu_sym_89	Zn2Br6C32H6N2O14	4.62971	6.47119	1.84147	-2.32793	-0.486459	62	BoydWoo						FALSE	FALSE	FALSE
qmof-4c6786c	boydwoo_str_m3_o14_o21_pcu_sym_152	Zn2C33H23I6N7O8	3.07935	5.20464	2.12529	-1.35811	0.767178	79	BoydWoo						FALSE	FALSE	FALSE
qmof-e65b4c0	boydwoo_str_m3_o14_o21_pcu_sym_225	Zn2C31H20N2O9	3.80394	6.05818	2.25424	-3.65823	-1.40399	64	BoydWoo						FALSE	FALSE	FALSE
qmof-35465ea	boydwoo_str_m3_o14_o24_nbo_sym_228	Zn6C70Cl5H36N5O24	2.8055	4.96342	2.15792	-3.06381	-0.905889	146	BoydWoo						FALSE	FALSE	FALSE
qmof-006f9b7	boydwoo_str_m3_o14_o24_pcu_sym_108	Zn2C30Cl5H13N2O14	3.84815	5.86114	2.01299	-1.77367	0.239316	66	BoydWoo						FALSE	FALSE	FALSE
qmof-bc956a0	boydwoo_str_m3_o14_o24_pcu_sym_219	Zn2C31H20N2O8	3.80222	5.94196	2.13973	-2.86876	-0.729029	63	BoydWoo						FALSE	FALSE	FALSE
qmof-0c697c4	boydwoo_str_m3_o14_o24_pcu_sym_26	Zn2C33H18N2O11	3.95502	6.1719	2.21688	-2.63249	-0.415614	66	BoydWoo						FALSE	FALSE	FALSE
qmof-2446a3a	boydwoo_str_m3_o14_o25_pcu_sym_89	Zn2C34FH17N2O8	3.35322	5.73113	2.37791	-3.81059	-1.43268	64	BoydWoo						TRUE	TRUE	TRUE
qmof-ddbf934	boydwoo_str_m3_o14_o29_pcu_sym_256	Zn2C58Cl4H24N4O18S2	4.39068	6.1288	1.73812	-3.62964	-1.89152	112	BoydWoo						FALSE	FALSE	FALSE
qmof-79de66a	boydwoo_str_m3_o16_o24_pcu_sym_56	Zn2C38H24N4O8	2.98284	4.92573	1.94289	-2.47904	-0.536146	76	BoydWoo						FALSE	FALSE	FALSE
qmof-68146ae	boydwoo_str_m3_o16_o26_pcu_sym_169	Zn2C44Cl5H24N5O8	3.31304	5.24245	1.92941	-3.26991	-1.34049	88	BoydWoo						FALSE	FALSE	FALSE
qmof-7d8b8c4	boydwoo_str_m3_o16_o26_pcu_sym_70	Zn2C55F4H11N13O8	5.03292	7.04881	2.01589	-4.69949	-2.6836	93	BoydWoo						FALSE	FALSE	FALSE
qmof-db703b3	boydwoo_str_m3_o16_o28_pcu_sym_35	Zn2C56F10H18N4O12	4.32316	6.29182	1.96866	-4.55311	-2.58445	102	BoydWoo						FALSE	FALSE	FALSE
qmof-2246e1d	boydwoo_str_m3_o16_o29_pcu_sym_227	Zn2C79H56N4O13	3.97024	5.5232	1.55296	-3.87829	-2.32533	154	BoydWoo						FALSE	FALSE	FALSE
qmof-40c4e6c	boydwoo_str_m3_o17_o23_pcu_sym_80	Zn2C64Cl12H28N2O8	3.73448	5.61692	1.88243	-3.11065	-1.22822	116	BoydWoo						FALSE	FALSE	FALSE
qmof-16edcac	boydwoo_str_m3_o17_o25_pcu_sym_15	Zn2C50Cl8H10N6O8	4.42434	6.31433	1.88999	-4.37205	-2.48206	84	BoydWoo						FALSE	FALSE	FALSE
qmof-51350de	boydwoo_str_m3_o17_o27_pcu_sym_159	Zn2C54H24N6O20	4.02773	6.0306	2.00287	-4.3315	-2.32863	106	BoydWoo						FALSE	FALSE	FALSE
qmof-40f78ce	boydwoo_str_m3_o17_o28_pcu_sym_153	Zn2C66H22N10O18	4.30195	6.27885	1.9769	-4.61687	-2.63997	118	BoydWoo						FALSE	FALSE	FALSE
qmof-76e7dc6	boydwoo_str_m3_o18_o18_pcu_sym_112	Zn2C56H36N8O8	2.7936	4.91968	2.12608	-3.26812	-1.14205	110	BoydWoo						FALSE	FALSE	FALSE
qmof-2e34efd	boydwoo_str_m3_o18_o20_pcu_sym_33	Zn2Br4C44Cl8H8N2O8	4.09178	6.08905	1.99727	-3.94049	-1.94322	76	BoydWoo						FALSE	FALSE	FALSE
qmof-029d2b0	boydwoo_str_m3_o18_o22_pcu_sym_8	Zn2C47Cl2H33N3O8	3.19389	5.31626	2.12237	-2.9895	-0.867129	95	BoydWoo						FALSE	FALSE	FALSE
qmof-abd1ccd	boydwoo_str_m3_o18_o28_pcu_sym_234	Zn2C70H42N6O18	4.16714	5.81304	1.6459	-4.2629	-2.617	138	BoydWoo						FALSE	FALSE	FALSE
qmof-304d957	boydwoo_str_m3_o18_o28_pcu_sym_253	Zn2C76Cl4H52N4O16	4.0359	5.70775	1.67185	-4.0145	-2.34265	154	BoydWoo						FALSE	FALSE	FALSE
qmof-3eac45e	boydwoo_str_m3_o18_o28_pcu_sym_261	Zn2Br2C64H30N4O12	4.08583	5.76251	1.67668	-4.39796	-2.72128	114	BoydWoo						FALSE	FALSE	FALSE
qmof-d68f170	boydwoo_str_m3_o18_o29_pcu_sym_110	Zn2C76H40N4O12	3.94036	5.53459	1.59423	-4.39513	-2.8009	134	BoydWoo						FALSE	FALSE	FALSE
qmof-3ef068e	boydwoo_str_m3_o18_o29_pcu_sym_154	Zn2Br4C74F2H30N4O12	4.20507	5.88612	1.68106	-4.53396	-2.8529	128	BoydWoo						FALSE	FALSE	FALSE
qmof-e7b4875	boydwoo_str_m3_o2_o11_pcu_sym_129	Zn2C30F2H18N2O16	3.15343	5.05015	1.89672	-3.47661	-1.57989	70	BoydWoo						FALSE	FALSE	FALSE
qmof-79f0214	boydwoo_str_m3_o2_o11_pcu_sym_158	Zn2C36H34N4O8	3.05381	5.20996	2.15616	-3.57417	-1.41802	84	BoydWoo						FALSE	FALSE	FALSE
qmof-ba67bb7	boydwoo_str_m3_o2_o14_pcu_sym_151	Zn2C40H34N6O8	2.42713	4.66434	2.23721	-2.90957	-0.672358	90	BoydWoo						FALSE	FALSE	FALSE
qmof-87276cb	boydwoo_str_m3_o2_o18_pcu_sym_255	Zn2Br10C44H16N2O20	3.61757	5.44887	1.83131	-2.87682	-1.04551	94	BoydWoo						FALSE	FALSE	FALSE
qmof-e252678	boydwoo_str_m3_o2_o21_pcu_sym_68	Zn2C32Cl6H16N6O8	3.37908	5.45827	2.07919	-3.89616	-1.81697	70	BoydWoo						FALSE	FALSE	FALSE
qmof-d4c0a72	boydwoo_str_m3_o2_o26_pcu_sym_171	Zn2C66H58N2O44	3.05988	5.23185	2.17197	-2.77538	-0.60341	172	BoydWoo						FALSE	FALSE	FALSE
qmof-44399ca	boydwoo_str_m3_o2_o26_pcu_sym_230	Zn2C44H30N6O12	3.37566	5.6547	2.27904	-4.24613	-1.96709	94	BoydWoo						FALSE	FALSE	FALSE
qmof-4615dbd	boydwoo_str_m3_o2_o26_pcu_sym_252	Zn2C40H16N12O28	4.73581	6.8824	2.14659	-4.89158	-2.74499	98	BoydWoo						FALSE	FALSE	FALSE
qmof-aab2608	boydwoo_str_m3_o2_o29_pcu_sym_110	Zn2C80H64N8O26	4.14523	6.03505	1.88982	-4.5618	-2.67197	180	BoydWoo						FALSE	FALSE	FALSE
qmof-8d68d51	boydwoo_str_m3_o2_o29_pcu_sym_146	Zn2C68H32N4O24	4.3475	6.28242	1.93491	-4.98996	-3.05505	130	BoydWoo						FALSE	FALSE	FALSE
qmof-c6cc493	boydwoo_str_m3_o2_o3_pcu_sym_113	Zn2C52H44N2O12	3.1555	5.48407	2.32856	-4.24202	-1.91346	112	BoydWoo						FALSE	FALSE	FALSE
qmof-8f0fcd4	boydwoo_str_m3_o2_o6_pcu_sym_49	Zn2C44H20N2O16	4.71749	7.18649	2.469	-5.45321	-2.98421	84	BoydWoo						FALSE	FALSE	FALSE
qmof-33c6e83	boydwoo_str_m3_o2_o7_pcu_sym_154	Zn2C44H32N2O8	3.18437	5.58235	2.39798	-4.41219	-2.0142	88	BoydWoo						FALSE	FALSE	FALSE
qmof-909d17d	boydwoo_str_m3_o2_o8_pcu_sym_118	Zn2C44Cl8H16N4O20	3.97506	6.36141	2.38635	-4.46713	-2.08078	94	BoydWoo						FALSE	FALSE	FALSE
qmof-a5c7ba1	boydwoo_str_m3_o21_o28_pcu_sym_86	Zn2C42H22N6O12	4.08985	6.14077	2.05092	-4.98635	-2.93543	84	BoydWoo						FALSE	FALSE	FALSE
qmof-0ad522b	boydwoo_str_m3_o22_o27_nbo_sym_53	Zn6C72H64N8O26	3.46031	6.45052	2.99021	-5.41402	-2.42381	176	BoydWoo						FALSE	FALSE	FALSE
qmof-e2c816e	boydwoo_str_m3_o22_o28_pcu_sym_84	Zn2C50H36N8O12	4.88953	7.28628	2.39675	-4.47405	-2.0773	108	BoydWoo						FALSE	FALSE	FALSE
qmof-d480554	boydwoo_str_m3_o22_o29_pcu_sym_167	Zn2C54Cl5H35N4O17	4.36235	6.31573	1.95338	-3.76451	-1.81112	117	BoydWoo						FALSE	FALSE	FALSE
qmof-38c74f5	boydwoo_str_m3_o22_o29_pcu_sym_60	Zn2C57H46N4O12	4.41274	6.48857	2.07584	-4.12757	-2.05174	121	BoydWoo						FALSE	FALSE	FALSE
qmof-94af341	boydwoo_str_m3_o22_o29_pcu_sym_76	Zn2C56H42N4O14	4.49786	6.5422	2.04433	-4.20804	-2.16371	118	BoydWoo						FALSE	FALSE	FALSE
qmof-555bacb	boydwoo_str_m3_o23_o24_pcu_sym_217	Zn2C34F20H2N10O24	4.91868	7.83068	2.91199	-4.84753	-1.93553	92	BoydWoo						FALSE	FALSE	FALSE
qmof-dda1cb2	boydwoo_str_m3_o23_o25_pcu_sym_75	Zn2C48H32I18N2O8	3.79245	5.99847	2.20603	-2.99852	-0.792498	110	BoydWoo						FALSE	FALSE	FALSE
qmof-b8f1825	boydwoo_str_m3_o23_o26_pcu_sym_20	Zn2C40F9H13N14O32	4.83321	7.86427	3.03105	-5.73819	-2.70714	110	BoydWoo						FALSE	FALSE	FALSE
qmof-6c81e33	boydwoo_str_m3_o23_o28_pcu_sym_36	Zn2C55H45N7O12	3.55571	5.79589	2.24018	-4.73111	-2.49093	121	BoydWoo						TRUE	TRUE	FALSE
qmof-1ca5878	boydwoo_str_m3_o23_o29_pcu_sym_64	Zn2C68Cl2H50N4O12	3.91753	5.97014	2.05261	-4.90964	-2.85704	138	BoydWoo						FALSE	FALSE	FALSE
qmof-ad7ba6d	boydwoo_str_m3_o24_o27_nbo_sym_260	Zn6C84H64N8O30S2	3.7148	6.6565	2.94169	-5.3348	-2.39311	194	BoydWoo						FALSE	FALSE	FALSE
qmof-670fdd3	boydwoo_str_m3_o24_o28_pcu_sym_212	Zn2C48H20N8O12	4.62273	6.84475	2.22202	-4.41044	-2.18841	90	BoydWoo						FALSE	FALSE	FALSE
qmof-0daa435	boydwoo_str_m3_o24_o29_pcu_sym_127	Zn2C54F10H18N4O42S10	6.17501	8.07765	1.90264	-3.53397	-1.63133	140	BoydWoo						FALSE	FALSE	FALSE
qmof-4f0af97	boydwoo_str_m3_o24_o29_pcu_sym_35	Zn2C54H24I2N6O16	4.63338	6.5954	1.96201	-3.90923	-1.94722	104	BoydWoo						FALSE	FALSE	FALSE
qmof-4048940	boydwoo_str_m3_o25_o28_pcu_sym_173	Zn2C52Cl4H20N4O12	4.12626	6.44772	2.32146	-5.3487	-3.02724	94	BoydWoo						FALSE	FALSE	FALSE
qmof-6ebc141	boydwoo_str_m3_o26_o27_pcu_sym_165	Zn2C52H44N6O8	3.55779	6.12411	2.56631	-5.11616	-2.54984	112	BoydWoo						FALSE	FALSE	FALSE
qmof-33b0cbe	boydwoo_str_m3_o26_o27_pcu_sym_63	Zn2C44H26N8O12	3.86481	6.50294	2.63814	-5.45827	-2.82014	92	BoydWoo						FALSE	FALSE	FALSE
qmof-0b51679	boydwoo_str_m3_o26_o28_pcu_sym_123	Zn2C72F6H58N4O12	3.93751	5.88139	1.94388	-4.74373	-2.79985	154	BoydWoo						FALSE	FALSE	FALSE
qmof-7a13182	boydwoo_str_m3_o26_o28_pcu_sym_165	Zn2C56H34N6O12	3.52441	5.56431	2.0399	-4.67376	-2.63386	110	BoydWoo						FALSE	FALSE	FALSE
qmof-23c88cb	boydwoo_str_m3_o3_o12_pcu_sym_136	Zn2Br8C42H30N12O8	2.36611	4.80887	2.44276	-3.04467	-0.601912	102	BoydWoo						FALSE	FALSE	FALSE
qmof-764dc05	boydwoo_str_m3_o3_o17_pcu_sym_86	Zn2C58H44N6O8	3.00004	5.22107	2.22103	-4.19619	-1.97517	118	BoydWoo						FALSE	FALSE	FALSE
qmof-abb0c43	boydwoo_str_m3_o3_o18_pcu_sym_183	Zn2C56H38N6O8	2.69198	4.67848	1.9865	-3.51715	-1.53065	110	BoydWoo						FALSE	FALSE	FALSE
qmof-3620829	boydwoo_str_m3_o3_o26_pcu_sym_20	Zn2C64F4H54N2O8	3.06554	5.33679	2.27125	-4.29892	-2.02768	134	BoydWoo						FALSE	FALSE	FALSE
qmof-08a8daa	boydwoo_str_m3_o3_o26_pcu_sym_272	Zn2C52F10H14N12O28	5.10671	7.06686	1.96014	-5.58773	-3.62759	118	BoydWoo						FALSE	FALSE	FALSE
qmof-8797c78	boydwoo_str_m3_o3_o26_pcu_sym_64	Zn2C52H34N10O16	3.84473	5.64508	1.80035	-4.62129	-2.82094	114	BoydWoo						FALSE	FALSE	FALSE
qmof-649b3f2	boydwoo_str_m3_o3_o5_pcu_sym_36	Zn2C52H60N14O16	2.31825	4.31395	1.9957	-2.38228	-0.386574	144	BoydWoo						FALSE	FALSE	FALSE
qmof-3467823	boydwoo_str_m3_o3_o7_pcu_sym_4	Zn2C68H80N18O8	2.24947	4.30368	2.05421	-3.10524	-1.05103	176	BoydWoo						FALSE	FALSE	FALSE
qmof-a1c8920	boydwoo_str_m3_o3_o8_pcu_sym_18	Zn2C52H38N6O8	2.95225	4.81875	1.86651	-3.98639	-2.11989	106	BoydWoo						FALSE	FALSE	FALSE
qmof-09ba5e4	boydwoo_str_m3_o4_o13_pcu_sym_123	Zn2C30H12N12O30	5.59399	7.47028	1.8763	-2.84983	-0.97353	86	BoydWoo						FALSE	FALSE	FALSE
qmof-2e1f180	boydwoo_str_m3_o4_o14_pcu_sym_204	Zn2C34H30N2O26S5	4.81358	6.90608	2.0925	-1.31643	0.77607	99	BoydWoo						FALSE	FALSE	FALSE
qmof-6bab288	boydwoo_str_m3_o4_o14_pcu_sym_240	Zn2C28ClH21N6O8	3.46626	5.56663	2.10037	-2.16304	-0.062669	66	BoydWoo						FALSE	FALSE	FALSE
qmof-7d881b1	boydwoo_str_m3_o4_o17_pcu_sym_246	Zn2C46H26N4O18	5.10288	7.14935	2.04647	-2.88327	-0.836798	96	BoydWoo						FALSE	FALSE	FALSE
qmof-645a178	boydwoo_str_m3_o4_o20_pcu_sym_167	Zn2C32H20N2O12	4.57306	6.53216	1.9591	-3.85495	-1.89586	68	BoydWoo						FALSE	FALSE	FALSE
qmof-27e2c83	boydwoo_str_m3_o4_o21_pcu_sym_261	Zn2C24Cl3H11N2O12	3.87887	6.14491	2.26604	-3.62144	-1.35539	54	BoydWoo						FALSE	FALSE	FALSE
qmof-0b496b6	boydwoo_str_m3_o4_o22_pcu_sym_260	Zn2Br6C31H18N2O18	4.47025	7.0095	2.53925	-1.99276	0.546496	77	BoydWoo						FALSE	FALSE	FALSE
qmof-24e85d6	boydwoo_str_m3_o4_o23_pcu_sym_41	Zn2C35H19N7O8	4.87773	7.1295	2.25177	-4.4926	-2.24083	71	BoydWoo						FALSE	FALSE	FALSE
qmof-f07e952	boydwoo_str_m3_o4_o26_pcu_sym_14	Zn2C32Cl8F13HN2O8	5.31631	7.35639	2.04008	-3.94	-1.89992	66	BoydWoo						FALSE	FALSE	FALSE
qmof-edc50fe	boydwoo_str_m3_o4_o27_pcu_sym_157	Zn2C32F6H14N6O8	4.09748	6.76483	2.66735	-4.59499	-1.92764	68	BoydWoo						FALSE	FALSE	FALSE
qmof-be35ab2	boydwoo_str_m3_o4_o27_pcu_sym_92	Zn2C33H16I4N6O10	4.07376	6.6509	2.57713	-3.7905	-1.21336	71	BoydWoo						FALSE	FALSE	FALSE
qmof-6efed02	boydwoo_str_m3_o4_o28_pcu_sym_136	Zn2C52Cl2H38N4O12	4.08463	6.25657	2.17193	-3.95294	-1.781	110	BoydWoo						FALSE	FALSE	FALSE
qmof-b5a79ba	boydwoo_str_m3_o4_o28_pcu_sym_184	Zn2C77H90N4O19	4.00729	6.32682	2.31952	-2.77653	-0.457002	192	BoydWoo						FALSE	FALSE	FALSE
qmof-80c10f6	boydwoo_str_m3_o4_o28_pcu_sym_260	Zn2C44Cl6F9H9N4O12	5.0671	7.41422	2.34713	-4.26487	-1.91774	86	BoydWoo						FALSE	FALSE	FALSE
qmof-8c5d275	boydwoo_str_m3_o4_o28_pcu_sym_78	Zn2C44H24N4O12	4.3422	6.82832	2.48611	-4.67844	-2.19233	86	BoydWoo						FALSE	FALSE	FALSE
qmof-b4a544a	boydwoo_str_m3_o4_o29_pcu_sym_150	Zn2C54Cl6H22N4O12	4.62779	6.71878	2.09099	-4.27161	-2.18061	100	BoydWoo						FALSE	FALSE	FALSE
qmof-d2f08f6	boydwoo_str_m3_o4_o29_pcu_sym_191	Zn2C65H40N4O28	3.91142	6.00057	2.08915	-3.85974	-1.77059	139	BoydWoo						FALSE	FALSE	FALSE
qmof-57e937f	boydwoo_str_m3_o4_o29_pcu_sym_66	Zn2C78F11H65N4O20	4.20027	6.13511	1.93484	-3.09231	-1.15747	180	BoydWoo						FALSE	FALSE	FALSE
qmof-f19d234	boydwoo_str_m3_o4_o7_pcu_sym_112	Zn2Br2C32H18N2O10	3.89738	5.97638	2.079	-3.75088	-1.67188	66	BoydWoo						FALSE	FALSE	FALSE
qmof-a567c29	boydwoo_str_m3_o4_o7_pcu_sym_33	Zn2C32Cl10F4H6N2O8	4.61847	6.81122	2.19275	-3.87096	-1.67821	64	BoydWoo						FALSE	FALSE	FALSE
qmof-6f89314	boydwoo_str_m3_o4_o8_pcu_sym_192	Zn2Br4C35H16N4O13	4.36171	6.91525	2.55354	-3.8828	-1.32926	74	BoydWoo						FALSE	FALSE	FALSE
qmof-231ce7d	boydwoo_str_m3_o40_o40_fof_sym_27	Zn6C90H30O36	3.78333	5.20641	1.42309	-1.95398	-0.530897	162	BoydWoo						FALSE	FALSE	FALSE
qmof-878fcc2	boydwoo_str_m3_o40_o41_fof_sym_106	Zn6Br10C94H20O24	4.38168	5.73749	1.35581	-2.65267	-1.29686	154	BoydWoo						FALSE	FALSE	FALSE
qmof-d15583a	boydwoo_str_m3_o41_o41_fof_sym_25	Zn6C108H42O24	4.28161	5.5399	1.25829	-2.44649	-1.1882	180	BoydWoo						FALSE	FALSE	FALSE
qmof-f05406c	boydwoo_str_m3_o5_o28_pcu_sym_56	Zn2C32H4I8N4O12	3.94447	6.06003	2.11556	-2.70447	-0.588908	62	BoydWoo						FALSE	FALSE	FALSE
qmof-a04209a	boydwoo_str_m3_o6_o15_pcu_sym_41	Zn2C84H44N6O16	4.17651	5.97288	1.79637	-2.62441	-0.828044	152	BoydWoo						FALSE	FALSE	FALSE
qmof-10cb6cd	boydwoo_str_m3_o6_o16_pcu_sym_121	Zn2C40H20I4N2O10	4.14441	6.12926	1.98484	-4.14767	-2.16283	78	BoydWoo						FALSE	FALSE	FALSE
qmof-1d7abc8	boydwoo_str_m3_o6_o17_pcu_sym_14	Zn2C44H8I8N2O14	4.35982	6.23758	1.87775	-4.10222	-2.22447	78	BoydWoo						FALSE	FALSE	FALSE
qmof-4a57b79	boydwoo_str_m3_o6_o18_pcu_sym_245	Zn2Br6C40H12N2O8	4.42099	6.21801	1.79701	-4.60154	-2.80452	70	BoydWoo						FALSE	FALSE	FALSE
qmof-0e8c4b6	boydwoo_str_m3_o6_o20_pcu_sym_1	Zn2C28H8N2O8	4.12048	6.20769	2.08721	-5.3805	-3.29329	48	BoydWoo						FALSE	FALSE	FALSE
qmof-8bfc542	boydwoo_str_m3_o6_o21_pcu_sym_214	Zn2Br6C28H4N2O8	4.42565	6.52318	2.09753	-5.23434	-3.13681	50	BoydWoo						FALSE	FALSE	FALSE
qmof-4ae6ad4	boydwoo_str_m3_o6_o22_pcu_sym_190	Zn2C30H20N2O10	3.83588	6.19204	2.35617	-4.91026	-2.55409	64	BoydWoo						FALSE	FALSE	FALSE
qmof-0d33b0c	boydwoo_str_m3_o6_o23_pcu_sym_3	Zn2C40H32N2O12	4.11274	6.26639	2.15365	-5.08823	-2.93458	88	BoydWoo						FALSE	FALSE	FALSE
qmof-d1061d7	boydwoo_str_m3_o6_o28_pcu_sym_140	Zn2C48H20N4O12	4.11423	6.22561	2.11138	-5.32084	-3.20946	86	BoydWoo						FALSE	FALSE	FALSE
qmof-e230445	boydwoo_str_m3_o6_o29_pcu_sym_173	Zn2C94H42N10O24	4.35757	6.14108	1.7835	-4.4915	-2.70799	172	BoydWoo						FALSE	FALSE	FALSE
qmof-8809609	boydwoo_str_m3_o6_o9_pcu_sym_108	Zn2C46H32N2O8	3.90491	5.77903	1.87412	-4.03166	-2.15754	90	BoydWoo						FALSE	FALSE	FALSE
qmof-ae6b8ab	boydwoo_str_m3_o6_o9_pcu_sym_164	Zn2C46H38N8O18	3.17705	5.28099	2.10393	-2.96646	-0.862529	112	BoydWoo						FALSE	FALSE	FALSE
qmof-bea0429	boydwoo_str_m3_o6_o9_pcu_sym_199	Zn2C42F4H16N2O12	4.04116	6.3492	2.30804	-4.56084	-2.2528	78	BoydWoo						FALSE	FALSE	FALSE
qmof-2bdd6ef	boydwoo_str_m3_o6_o9_pcu_sym_215	Zn2Br6C40Cl4H10N2O8	4.30776	6.25584	1.94808	-4.00581	-2.05773	72	BoydWoo						FALSE	FALSE	FALSE
qmof-3d670d8	boydwoo_str_m3_o7_o10_pcu_sym_201	Zn2C32H18N2O10	3.46177	5.31964	1.85787	-4.07287	-2.215	64	BoydWoo						FALSE	FALSE	FALSE
qmof-b5c7314	boydwoo_str_m3_o7_o10_pcu_sym_233	Zn2C44H42N2O14	3.22092	5.45602	2.2351	-3.58113	-1.34603	104	BoydWoo						FALSE	FALSE	FALSE
qmof-0475987	boydwoo_str_m3_o7_o11_pcu_sym_233	Zn2C54H72N14O16	2.30542	4.42702	2.1216	-2.42336	-0.301758	158	BoydWoo						FALSE	FALSE	FALSE
qmof-9997f68	boydwoo_str_m3_o7_o16_pcu_sym_118	Zn2C44H24N2O14S2	3.68172	5.79425	2.11253	-4.40434	-2.2918	88	BoydWoo						TRUE	FALSE	FALSE
qmof-9b52dea	boydwoo_str_m3_o7_o18_pcu_sym_186	Zn2C58H48N4O8	3.16119	5.09686	1.93567	-3.75106	-1.81539	120	BoydWoo						FALSE	FALSE	FALSE
qmof-25097fe	boydwoo_str_m3_o7_o21_pcu_sym_60	Zn2C44H18N2O20	4.72111	6.67869	1.95758	-5.20814	-3.25056	86	BoydWoo						FALSE	FALSE	FALSE
qmof-cec6153	boydwoo_str_m3_o7_o22_pcu_sym_12	Zn2C40H32N2O10	3.37515	5.67572	2.30057	-4.38737	-2.0868	86	BoydWoo						TRUE	TRUE	TRUE
qmof-4e884d7	boydwoo_str_m3_o7_o22_pcu_sym_130	Zn2C50H52N2O14	3.22167	5.18613	1.96446	-3.5012	-1.53674	120	BoydWoo						FALSE	FALSE	FALSE
qmof-7616aac	boydwoo_str_m3_o7_o23_pcu_sym_58	Zn2C54F2H26N2O20	4.05342	6.48346	2.43004	-5.14624	-2.71619	106	BoydWoo						FALSE	FALSE	FALSE
qmof-6ba8301	boydwoo_str_m3_o7_o25_pcu_sym_106	Zn2C66H28N12O28	4.90532	6.93505	2.02973	-5.01663	-2.9869	136	BoydWoo						FALSE	FALSE	FALSE
qmof-65ef97b	boydwoo_str_m3_o7_o25_pcu_sym_172	Zn2C56H34N2O10	3.53095	5.86131	2.33036	-4.71182	-2.38146	104	BoydWoo						TRUE	TRUE	FALSE
qmof-dabb11e	boydwoo_str_m3_o7_o26_pcu_sym_259	Zn2C50H26N2O20	3.90514	5.85944	1.95429	-4.68828	-2.73398	100	BoydWoo						FALSE	FALSE	FALSE
qmof-17a47b2	boydwoo_str_m3_o7_o26_pcu_sym_28	Zn2C62H76N16O8	2.61544	4.68601	2.07057	-3.28652	-1.21595	164	BoydWoo						FALSE	FALSE	FALSE
qmof-22f1463	boydwoo_str_m3_o7_o27_pcu_sym_103	Zn2C48H28N10O16	4.4522	5.03279	0.580591	-3.97412	-3.39353	104	BoydWoo						FALSE	FALSE	FALSE
qmof-29c0bd6	boydwoo_str_m3_o7_o28_pcu_sym_11	Zn2C62Cl8H32N4O18	4.27436	5.91472	1.64036	-4.69974	-3.05938	126	BoydWoo						FALSE	FALSE	FALSE
qmof-97d5d0e	boydwoo_str_m3_o7_o29_pcu_sym_1	Zn2C66H32N4O12	4.13313	5.79933	1.6662	-4.98945	-3.32325	116	BoydWoo						FALSE	FALSE	FALSE
qmof-825c2c6	boydwoo_str_m3_o7_o29_pcu_sym_61	Zn2C70H40N4O12	4.07311	5.85534	1.78222	-5.00306	-3.22084	128	BoydWoo						FALSE	FALSE	FALSE
qmof-8443b22	boydwoo_str_m3_o7_o9_pcu_sym_164	Zn2C72H40N2O26	4.41181	7.2089	2.79709	-4.40203	-1.60493	142	BoydWoo						FALSE	FALSE	FALSE
qmof-bbdb65b	boydwoo_str_m3_o7_o9_pcu_sym_256	Zn2C68H44N10O8	4.66286	6.60681	1.94395	-4.00858	-2.06463	132	BoydWoo						FALSE	FALSE	FALSE
qmof-d57448c	boydwoo_str_m3_o8_o10_pcu_sym_135	Zn2C30Cl4H20N8O8	3.95718	5.97448	2.0173	-4.17318	-2.15588	72	BoydWoo						FALSE	FALSE	FALSE
qmof-369262d	boydwoo_str_m3_o8_o13_pcu_sym_57	Zn2C38H18N10O20	4.47865	6.69855	2.21991	-5.15976	-2.93986	88	BoydWoo						FALSE	FALSE	FALSE
qmof-ddfc64a	boydwoo_str_m3_o8_o13_pcu_sym_74	Zn2C36H22N6O14	3.19307	4.78443	1.59136	-3.51689	-1.92553	80	BoydWoo						FALSE	FALSE	FALSE
qmof-9931f8f	boydwoo_str_m3_o8_o22_pcu_sym_270	Zn2C37H39N11O11	3.77239	6.03224	2.25985	-4.37693	-2.11707	100	BoydWoo						TRUE	FALSE	FALSE
qmof-76de5fa	boydwoo_str_m3_o8_o26_pcu_sym_68	Zn2C42H30N6O20S4	4.16561	6.45889	2.29328	-5.03322	-2.73995	104	BoydWoo						FALSE	FALSE	FALSE
qmof-6a4cff2	boydwoo_str_m3_o8_o8_pcu_sym_193	Zn2C38F4H6N22O36	5.48833	8.23354	2.74521	-6.25457	-3.50936	108	BoydWoo						FALSE	FALSE	FALSE
qmof-eade42c	boydwoo_str_m3_o8_o8_pcu_sym_5	Zn2C40H24N16O20	4.38882	6.89172	2.5029	-5.52619	-3.02329	102	BoydWoo						FALSE	FALSE	FALSE
qmof-5ab6b28	boydwoo_str_m4_Al_o11_o19_acs_sym_127	Al6C36H14O28	4.65822	7.20375	2.54553	-4.14903	-1.6035	84	BoydWoo						FALSE	FALSE	FALSE
qmof-070d551	boydwoo_str_m4_Al_o13_o21_acs_sym_138	Al6C60H26O31	3.68247	6.22031	2.53783	-3.11418	-0.576349	123	BoydWoo						FALSE	FALSE	FALSE
qmof-49df74b	boydwoo_str_m4_Al_o13_o21_acs_sym_47	Al6C66F5H33O34	3.9245	6.45395	2.52945	-3.04604	-0.516589	144	BoydWoo						FALSE	FALSE	FALSE
qmof-705b6ab	boydwoo_str_m4_Al_o17_o17_acs_sym_23	Al6Br12C108Cl12H26O28	3.80509	6.15478	2.34969	-1.79171	0.557981	192	BoydWoo						FALSE	FALSE	FALSE
qmof-6038f07	boydwoo_str_m4_Al_o17_o23_acs_sym_46	Al6C96Cl12H50O46S6	3.55405	6.23258	2.67854	-2.76257	-0.084038	216	BoydWoo						FALSE	FALSE	FALSE
qmof-e2185c7	boydwoo_str_m4_Al_o17_o25_acs_sym_18	Al6C96H56N12O28	3.15331	5.12583	1.97252	-1.72285	0.249674	198	BoydWoo						FALSE	FALSE	FALSE
qmof-8325046	boydwoo_str_m4_Al_o17_o25_acs_sym_181	Al6C105H62O52S8	4.10336	5.96985	1.86649	-2.03717	-0.170681	233	BoydWoo						FALSE	FALSE	FALSE
qmof-250bcfe	boydwoo_str_m4_Al_o17_o25_acs_sym_46	Al6C96H42N2O32	3.57446	6.02208	2.44761	-2.92227	-0.474661	178	BoydWoo						TRUE	TRUE	FALSE
qmof-3a9cbbf	boydwoo_str_m4_Al_o19_o22_acs_sym_30	Al6Br2C48H36O28	4.13493	6.92329	2.78836	-3.18507	-0.396711	120	BoydWoo						FALSE	FALSE	FALSE
qmof-1b6b7d3	boydwoo_str_m4_Al_o2_o25_acs_sym_195	Al6C90H44O49S5	4.01453	6.6109	2.59637	-2.67788	-0.081512	194	BoydWoo						FALSE	FALSE	FALSE
qmof-d71e4e0	boydwoo_str_m4_Al_o2_o6_acs_sym_118	Al6C83H33N5O28	4.04504	6.68801	2.64298	-3.60509	-0.962116	155	BoydWoo						FALSE	FALSE	FALSE
qmof-3c935c8	boydwoo_str_m4_Al_o2_o6_acs_sym_199	Al6C102H62O31	3.73862	6.47603	2.73741	-3.24756	-0.510144	201	BoydWoo						FALSE	FALSE	FALSE
qmof-8b511ee	boydwoo_str_m4_Al_o20_o25_acs_sym_87	Al6C70H19N3O29	4.54078	6.89167	2.35089	-3.76879	-1.41789	127	BoydWoo						FALSE	FALSE	FALSE
qmof-dc505ad	boydwoo_str_m4_Al_o23_o25_acs_sym_164	Al6C85H67NO31	3.59028	6.45401	2.86373	-3.53329	-0.669552	190	BoydWoo						FALSE	FALSE	FALSE
qmof-35e2d08	boydwoo_str_m4_Al_o23_o25_acs_sym_184	Al6C84H66N2O32	3.60298	6.44278	2.8398	-3.677	-0.837209	190	BoydWoo						FALSE	FALSE	FALSE
qmof-513e1bb	boydwoo_str_m4_Al_o23_o25_acs_sym_220	Al6C84H69NO37S3	3.37993	6.34054	2.96061	-3.412	-0.45139	200	BoydWoo						FALSE	FALSE	FALSE
qmof-20529db	boydwoo_str_m4_Al_o27_o27_acs_sym_193	Al6C96Cl6H44N24O28	3.98187	6.7144	2.73252	-4.07463	-1.34211	204	BoydWoo						FALSE	FALSE	FALSE
qmof-748e762	boydwoo_str_m4_Al_o27_o27_acs_sym_76	Al6C102H68N30O28	3.53485	5.52402	1.98917	-3.31954	-1.33037	234	BoydWoo						FALSE	FALSE	FALSE
qmof-a6f3f87	boydwoo_str_m4_Al_o6_o17_acs_sym_189	Al6C90H23I15O28	3.99572	5.987	1.99128	-1.55656	0.434725	162	BoydWoo						FALSE	FALSE	FALSE
qmof-38471da	boydwoo_str_m4_Al_o6_o17_acs_sym_60	Al6C100H62N4O28	3.67147	5.76146	2.09	-2.18224	-0.092241	200	BoydWoo						TRUE	FALSE	FALSE
qmof-0743acf	boydwoo_str_m4_Al_o6_o20_acs_sym_92	Al6C72F4H34O28	4.45771	6.86528	2.40757	-3.982	-1.57443	144	BoydWoo						FALSE	FALSE	FALSE
qmof-c85eddf	boydwoo_str_m4_Al_o6_o25_acs_sym_102	Al6C85H48O30	4.13733	6.74796	2.61063	-3.76771	-1.15708	169	BoydWoo						FALSE	FALSE	FALSE
qmof-2e2ea03	boydwoo_str_m4_Al_o6_o25_acs_sym_153	Al6C88H48O28	3.91621	6.58397	2.66777	-3.75127	-1.0835	170	BoydWoo						FALSE	FALSE	FALSE
qmof-22baac9	boydwoo_str_m4_Al_o6_o25_acs_sym_222	Al6Br8C80H32O34	4.07871	6.68125	2.60255	-3.3809	-0.778359	160	BoydWoo						FALSE	FALSE	FALSE
qmof-5b07106	boydwoo_str_m4_Al_o6_o6_acs_sym_102	Al6C84H50I12N12O28	3.77428	5.95655	2.18227	-2.18286	-0.000588	192	BoydWoo						TRUE	FALSE	FALSE
qmof-e5adf3c	boydwoo_str_m4_Al_o6_o6_acs_sym_43	Al6Br12C84H14O52	4.03879	6.77851	2.73972	-2.92832	-0.188596	168	BoydWoo						FALSE	FALSE	FALSE
qmof-ef72fd7	boydwoo_str_m4_Al_o7_o27_acs_sym_159	Al6C102H56N14O32	4.02269	6.39923	2.37654	-3.75492	-1.37838	210	BoydWoo						FALSE	FALSE	FALSE
qmof-26920f5	boydwoo_str_m4_Al_o7_o27_acs_sym_173	Al6C112H66N12O32	3.80012	6.26598	2.46586	-3.629	-1.16314	228	BoydWoo						FALSE	FALSE	FALSE
qmof-0fa90ce	boydwoo_str_m5_Al_o10_o29_sra_sym_51	Al4C96H64N4O32	4.68609	6.59505	1.90896	-2.39673	-0.487769	200	BoydWoo						FALSE	FALSE	FALSE
qmof-35e0b44	boydwoo_str_m5_Al_o13_o19_sra_sym_136	Al4C44F4H28O28	3.63861	5.89629	2.25768	-2.48877	-0.231089	108	BoydWoo						TRUE	TRUE	FALSE
qmof-5a70274	boydwoo_str_m5_Al_o13_o27_sra_sym_13	Al4C59H38N8O20	3.46078	6.5747	3.11393	-4.11443	-1.0005	129	BoydWoo						FALSE	FALSE	FALSE
qmof-e29169f	boydwoo_str_m5_Al_o16_o20_sra_sym_78	Al4C48H20O26	3.88258	5.72327	1.84069	-3.08068	-1.23999	98	BoydWoo						FALSE	FALSE	FALSE
qmof-99e633f	boydwoo_str_m5_Al_o17_o20_sra_sym_9	Al4C56H28O24	3.41839	5.42538	2.00699	-2.98599	-0.978993	112	BoydWoo						FALSE	FALSE	FALSE
qmof-0a7a2fd	boydwoo_str_m5_Al_o18_o28_sra_sym_87	Al4Br4C100H44N4O32	4.69643	6.37873	1.6823	-3.66337	-1.98107	188	BoydWoo						FALSE	FALSE	FALSE
qmof-3133b45	boydwoo_str_m5_Al_o2_o13_sra_sym_102	Al4C72H68N12O36	3.04101	4.92509	1.88407	-0.786583	1.09749	192	BoydWoo						FALSE	FALSE	FALSE
qmof-e1625e5	boydwoo_str_m5_Al_o2_o2_sra_sym_20	Al4C60Cl4H27N5O30	3.67881	5.931	2.25219	-1.82523	0.426955	130	BoydWoo						TRUE	FALSE	FALSE
qmof-2665f66	boydwoo_str_m5_Al_o2_o27_sra_sym_79	Al4C60H36N8O20	3.41622	6.52362	3.1074	-4.43317	-1.32577	128	BoydWoo						FALSE	FALSE	FALSE
qmof-63e34f0	boydwoo_str_m5_Al_o20_o25_sra_sym_95	Al4C38H14N4O20	3.7651	5.93259	2.1675	-4.0282	-1.8607	80	BoydWoo						TRUE	FALSE	FALSE
qmof-bdc796a	boydwoo_str_m5_Al_o21_o26_sra_sym_130	Al4C56H44N16O36	4.81379	6.87234	2.05855	-3.23101	-1.17246	156	BoydWoo						FALSE	FALSE	FALSE
qmof-2c46c8a	boydwoo_str_m5_Al_o27_o27_sra_sym_116	Al4C64Cl8H28N16O20	3.70707	6.68254	2.97547	-4.42698	-1.45151	140	BoydWoo						FALSE	FALSE	FALSE
qmof-51a592d	boydwoo_str_m5_Al_o27_o27_sra_sym_158	Al4C64H28I8N16O36	3.92196	5.86652	1.94456	-3.35316	-1.4086	156	BoydWoo						FALSE	FALSE	FALSE
qmof-7dbd529	boydwoo_str_m5_Al_o27_o27_sra_sym_91	Al4C64H20I16N16O20	3.91172	6.50325	2.59153	-3.46602	-0.874491	140	BoydWoo						FALSE	FALSE	FALSE
qmof-34451ee	boydwoo_str_m5_Al_o3_o27_sra_sym_19	Al4C76H44I4N4O20	3.41127	6.31419	2.90292	-4.21	-1.30708	152	BoydWoo						FALSE	FALSE	FALSE
qmof-320bc35	boydwoo_str_m5_Al_o3_o27_sra_sym_25	Al4C76F16H36N8O20	3.70279	5.95336	2.25057	-3.75376	-1.5032	160	BoydWoo						TRUE	FALSE	FALSE
qmof-b7be715	boydwoo_str_m5_Al_o3_o27_sra_sym_43	Al4C76H40I8N4O20	3.13357	5.94425	2.81068	-3.66803	-0.857356	152	BoydWoo						FALSE	FALSE	FALSE
qmof-ad4b0d7	boydwoo_str_m5_Al_o3_o27_sra_sym_56	Al4C76Cl24H24N4O40	3.20604	5.38282	2.17678	-2.35795	-0.181163	172	BoydWoo						FALSE	FALSE	FALSE
qmof-1f8a415	boydwoo_str_m5_Al_o6_o25_sra_sym_116	Al4C52H28N2O20	3.18195	5.10053	1.91859	-3.17151	-1.25292	106	BoydWoo						FALSE	FALSE	FALSE
qmof-d7e755d	boydwoo_str_m5_Al_o6_o25_sra_sym_98	Al4C62H34O28	4.35108	6.41189	2.06081	-3.99131	-1.9305	128	BoydWoo						FALSE	FALSE	FALSE
qmof-ef93a15	boydwoo_str_m5_Al_o6_o27_sra_sym_115	Al4C64H48N12O20	3.26301	5.43641	2.1734	-3.21864	-1.04523	148	BoydWoo						FALSE	FALSE	FALSE
qmof-d5b7dd9	boydwoo_str_m5_Al_o7_o18_sra_sym_79	Al4C72H24N16O60	5.29513	7.2722	1.97707	-3.14634	-1.16927	176	BoydWoo						FALSE	FALSE	FALSE
qmof-c63d32a	boydwoo_str_m5_Al_o8_o16_sra_sym_4	Al4C60H34N6O26	3.89376	5.96575	2.07199	-3.12745	-1.05546	130	BoydWoo						FALSE	FALSE	FALSE
qmof-d76ea7b	boydwoo_str_m5_Al_o8_o16_sra_sym_63	Al4C78H66I6N4O26	3.23146	5.46591	2.23445	-1.84269	0.391754	184	BoydWoo						FALSE	FALSE	FALSE
qmof-68d0826	boydwoo_str_m5_Al_o8_o21_sra_sym_26	Al4C47H24I6N4O20	3.62375	5.86596	2.24221	-3.233	-0.99079	105	BoydWoo						TRUE	TRUE	FALSE
qmof-994af66	boydwoo_str_m5_Al_o8_o26_sra_sym_100	Al4C58H38N6O36	3.87366	6.04198	2.16831	-3.72987	-1.56156	142	BoydWoo						FALSE	FALSE	FALSE
qmof-48537be	boydwoo_str_m5_Al_o8_o26_sra_sym_165	Al4C76F14H60N6O38	3.34935	5.72382	2.37447	-3.11319	-0.73872	198	BoydWoo						TRUE	TRUE	TRUE
qmof-508fdd0	boydwoo_str_m5_Al_o8_o26_sra_sym_232	Al4C58H36N8O24	3.99839	6.35168	2.35329	-4.28329	-1.93	130	BoydWoo						FALSE	FALSE	FALSE
qmof-14fcdee	boydwoo_str_m7_o1_o10_bcu_sym_181	Zn4C40H27N17O2	3.83949	5.61832	1.77884	-1.97687	-0.198036	90	BoydWoo						FALSE	FALSE	FALSE
qmof-02e17f1	boydwoo_str_m7_o11_o24_bcu_sym_33	Zn4C46H32I2N16O2	2.81666	4.7895	1.97284	-2.62654	-0.653694	102	BoydWoo						FALSE	FALSE	FALSE
qmof-8bfd99e	boydwoo_str_m7_o2_o13_bcu_sym_14	Zn4C69H40N22O13	4.22241	5.84336	1.62094	-3.66627	-2.04532	148	BoydWoo						FALSE	FALSE	FALSE
qmof-5e5ad16	boydwoo_str_m7_Zn_o11_o22_bcu_sym_123	Zn4C44H39N17O2	1.99908	4.38985	2.39078	-2.47897	-0.088197	106	BoydWoo						FALSE	FALSE	FALSE
qmof-7daffde	boydwoo_str_m7_Zn_o11_o22_bcu_sym_66	Zn4C44H39N17O2	2.64586	4.62883	1.98298	-2.5649	-0.58192	106	BoydWoo						FALSE	FALSE	FALSE
qmof-b867fda	boydwoo_str_m7_Zn_o12_o24_bcu_sym_173	Zn8C96F16H48N40O16	4.12015	5.93854	1.81839	-3.05876	-1.24037	224	BoydWoo						FALSE	FALSE	FALSE
qmof-36d73a2	boydwoo_str_m7_Zn_o17_o26_bcu_sym_182	Zn4C89H53N25O18	3.99321	5.78571	1.7925	-3.80324	-2.01074	189	BoydWoo						FALSE	FALSE	FALSE
qmof-85dd0ae	boydwoo_str_m7_Zn_o17_o26_bcu_sym_55	Zn4C99H40I12N16O15	4.05145	5.96818	1.91673	-3.28628	-1.36955	186	BoydWoo						FALSE	FALSE	FALSE
qmof-7974618	boydwoo_str_m7_Zn_o19_o21_bcu_sym_81	Zn4C48H17I3N16O4	3.51015	5.34066	1.83051	-3.5131	-1.68258	92	BoydWoo						FALSE	FALSE	FALSE
qmof-b0410f7	boydwoo_str_m7_Zn_o2_o13_bcu_sym_120	Zn4C74F4H52N16	2.54713	4.30101	1.75388	-2.08235	-0.32847	150	BoydWoo						FALSE	FALSE	FALSE
qmof-df6a8cc	boydwoo_str_m7_Zn_o2_o13_bcu_sym_197	Zn4C68FH39N20O8	3.33869	5.49913	2.16044	-3.4215	-1.26106	140	BoydWoo						FALSE	FALSE	FALSE
qmof-16937aa	boydwoo_str_m7_Zn_o20_o25_bcu_sym_51	Zn4C58F4H18N16O8	3.51535	5.59968	2.08433	-4.25425	-2.16992	108	BoydWoo						FALSE	FALSE	FALSE
qmof-cafa193	boydwoo_str_m7_Zn_o25_o25_bcu_sym_151	Zn4C72H32N24O18	3.71371	6.03085	2.31715	-4.48891	-2.17177	150	BoydWoo						TRUE	FALSE	FALSE
qmof-9c61283	boydwoo_str_m7_Zn_o25_o25_bcu_sym_261	Zn4C82H32N24O26	3.92217	6.19408	2.27191	-4.25946	-1.98755	168	BoydWoo						FALSE	FALSE	FALSE
qmof-d5e77c0	boydwoo_str_m7_Zn_o4_o13_bcu_sym_100	Zn4C60F4H36N16	3.4898	5.6888	2.19901	-2.31348	-0.114475	120	BoydWoo						TRUE	TRUE	FALSE
qmof-affcedc	boydwoo_str_m7_Zn_o6_o25_bcu_sym_188	Zn4C76F12H22N16O10	3.98824	6.04518	2.05694	-4.44766	-2.39072	140	BoydWoo						FALSE	FALSE	FALSE
qmof-42a8827	boydwoo_str_m7_Zn_o8_o17_bcu_sym_104	Zn4C87H69N27O12S4	3.01603	5.22526	2.20922	-3.20746	-0.998235	203	BoydWoo						FALSE	FALSE	FALSE
qmof-1b3859b	boydwoo_str_m7_Zn_o8_o17_bcu_sym_119	Zn4C83H54N20	3.1413	5.29962	2.15833	-3.75872	-1.6004	161	BoydWoo						FALSE	FALSE	FALSE
qmof-178fc48	boydwoo_str_m7_Zn_o8_o17_bcu_sym_228	Zn4C80H61N33	2.6425	4.4285	1.786	-2.88406	-1.09806	178	BoydWoo						FALSE	FALSE	FALSE
qmof-83d60f6	boydwoo_str_m7_Zn_o8_o23_bcu_sym_22	Zn4C83F12H44N20O11	3.94317	6.06532	2.12215	-4.48491	-2.36276	174	BoydWoo						FALSE	FALSE	FALSE
qmof-959fc3d	boydwoo_str_m7_Zn_o8_o23_bcu_sym_225	Zn4C81H56N20O13	3.41632	5.63588	2.21956	-4.08417	-1.86461	174	BoydWoo						FALSE	FALSE	FALSE
qmof-9c0ae5c	boydwoo_str_m7_Zn_o8_o23_bcu_sym_88	Zn4C72F6H50N20O9S3	4.0456	5.75518	1.70959	-4.33248	-2.62289	164	BoydWoo						FALSE	FALSE	FALSE
qmof-d535864	boydwoo_str_m7_Zn_o8_o25_bcu_sym_36	Zn4C72Cl17H27N20O12	3.72388	5.9108	2.18692	-3.99722	-1.8103	152	BoydWoo						TRUE	FALSE	FALSE
qmof-57e829d	boydwoo_str_m7_Zn_o8_o25_bcu_sym_81	Zn4C80H68N28O5	2.66671	5.03065	2.36394	-3.56064	-1.1967	185	BoydWoo						FALSE	FALSE	FALSE
qmof-5ee8a95	BOZJOR_FSR	Ni2C36H44N4O12	1.79776	5.92267	4.12491	-0.898203	3.2267	98	CSD						FALSE	FALSE	FALSE
qmof-e266949	BOZJUX_FSR	Ni2C40H52N4O12	1.78993	5.88565	4.09572	-0.98976	3.10596	110	CSD						FALSE	FALSE	FALSE
qmof-e172a22	BUBDOT_FSR	Cu2C40H28N8O12	2.92284	6.69816	3.77532	-1.32569	2.44963	90	CSD						FALSE	FALSE	FALSE
qmof-19ecdb0	BUCTEZ_FSR	CoC22H22N8O6S2	2.23745	5.66324	3.4258	-0.469451	2.95635	61	CSD						FALSE	FALSE	FALSE
qmof-df86412	BUHFER_FSR	Cu12C48H32I8N20	3.0039	5.47788	2.47398	1.33935	3.81332	120	CSD						FALSE	FALSE	FALSE
qmof-be3ffea	BUNJOK_FSR	CoBr4C32H20N8O8	2.5838	6.09542	3.51162	-0.373255	3.13837	73	CSD						FALSE	FALSE	FALSE
qmof-7ce0736	BUSBAT_FSR	Cu4V4C52F4H40N8O20P4	2.96682	6.61255	3.64573	-0.659688	2.98604	136	CSD						FALSE	FALSE	FALSE
qmof-0385604	BUSCIC_FSR	Cu2C36H32N4O20P4	2.96731	7.24943	4.28212	-1.25594	3.02618	98	CSD						FALSE	FALSE	FALSE
qmof-4b1ef88	BUSMUY_FSR	Co3C72H48N30	1.78621	4.70207	2.91587	-1.00661	1.90925	153	CSD						FALSE	FALSE	FALSE
qmof-22ff87f	BUVWOF01_FSR	Fe2C48H32N20	2.75232	5.26162	2.5093	0.227848	2.73715	102	CSD						FALSE	FALSE	FALSE
qmof-c861c48	BUVWOF03_FSR	Fe6C144H96N60	1.99642	4.72241	2.726	-0.831272	1.89472	306	CSD						FALSE	FALSE	FALSE
qmof-b0402ac	BUVXOG01_FSR	Fe3C72H48N30	1.6058	4.30278	2.69699	-0.516203	2.18078	153	CSD						FALSE	FALSE	FALSE
qmof-a8ea913	BUVYIB_FSR	Fe3C72H48N30	2.38718	5.15184	2.76466	-2.54826	0.216409	153	CSD						FALSE	FALSE	FALSE
qmof-08c5035	BUVZOI_FSR	Ag2C24H16N6O10	3.16878	4.96983	1.80105	0.634757	2.43581	58	CSD						FALSE	FALSE	FALSE
qmof-0b09ca3	BUXKAH_FSR	Ni2C66H52N4O16	3.50303	5.3279	1.82487	-0.736083	1.08879	140	CSD						FALSE	FALSE	FALSE
qmof-cd0f38e	BUZHUA_FSR	CuC26F2H22N2O8	3.08123	6.13345	3.05221	-0.442152	2.61006	61	CSD						FALSE	FALSE	FALSE
qmof-145a0bf	CADJAT_FSR	Co2C40H28N4O8	2.71224	5.59877	2.88653	-0.329643	2.55688	82	CSD						FALSE	FALSE	FALSE
qmof-4e9c14b	CADNEC01_FSR	Ag4C58H60N8O8	2.72522	5.20492	2.47969	-0.704822	1.77487	138	CSD						FALSE	FALSE	FALSE
qmof-5a2471d	CADYOZ_FSR	Mn6C36H12O18	2.9885	5.58223	2.59373	-2.59488	-0.001153	72	CSD						FALSE	FALSE	FALSE
qmof-767c706	CAHNAC_FSR	Co4C56H48N16O16	2.61561	6.76314	4.14753	-1.46238	2.68516	140	CSD						FALSE	FALSE	FALSE
qmof-ebf848f	CANYIA01_FSR	Cu2C38H42N4O12	2.74377	6.31022	3.56645	-1.69762	1.86883	98	CSD						FALSE	FALSE	FALSE
qmof-529911c	CAPQIU_FSR	Cu20C40Cl20H40N8S8	3.64121	5.95776	2.31655	1.4102	3.72675	136	CSD						TRUE	TRUE	FALSE
qmof-2449d69	CAQSUK_FSR	Rh4C36H32O16	2.78505	5.29377	2.50872	-0.087861	2.42086	88	CSD						FALSE	FALSE	FALSE
qmof-64ce5e9	CAQXAT01_FSR	Cu2C8H8I2N4	3.37466	5.34819	1.97353	1.2102	3.18374	24	CSD						FALSE	FALSE	FALSE
qmof-3b0015d	CAVCEI_FSR	Co4C8H24N4O12P4	2.27414	6.62812	4.35398	0.011227	4.36521	56	CSD						FALSE	FALSE	FALSE
qmof-494ec46	CAWXAZ_FSR	Cu8C48H48N24	2.5244	5.11996	2.59556	0.114199	2.70976	128	CSD						FALSE	FALSE	FALSE
qmof-705ecf9	CAXVUV_FSR	Co2C40H36N16O4S4	2.43588	5.77834	3.34246	0.193654	3.53612	102	CSD						FALSE	FALSE	FALSE
qmof-6bd80b9	CAXYEH_FSR	Cu4C28H24N24O12	3.88052	7.02078	3.14026	-1.11977	2.02048	92	CSD						FALSE	FALSE	FALSE
qmof-3eec122	CECHAW_FSR	Cu3C120H72N24	3.64785	5.85704	2.20918	-1.31644	0.892746	219	CSD						TRUE	TRUE	FALSE
qmof-010c828	CECVOX_FSR	Ni2C76Cl4H68N20O8	3.1006	5.92497	2.82437	-1.85319	0.971184	178	CSD						FALSE	FALSE	FALSE
qmof-02d2885	CECYOY_FSR	Cu8C24Cl8H48N24S24	3.88016	5.80747	1.92731	-0.291581	1.63573	136	CSD						FALSE	FALSE	FALSE
qmof-81003ca	CEHWIX_FSR	Ni4C20Cl4H20N8O12	3.70361	6.80951	3.1059	-1.32767	1.77823	68	CSD						FALSE	FALSE	FALSE
qmof-b190302	CELYEA_FSR	FePtC12H8N8	2.51148	5.47968	2.9682	-0.58056	2.38764	30	CSD						FALSE	FALSE	FALSE
qmof-2adaa4e	CELYIE_FSR	FePdC12H8N8	2.45062	5.52518	3.07455	-0.747986	2.32657	30	CSD						FALSE	FALSE	FALSE
qmof-d724ac4	CETMAS_FSR	Cu20Ni8C88H96I20N48	2.85843	5.27204	2.41361	0.449057	2.86267	280	CSD						FALSE	FALSE	FALSE
qmof-8b93db2	CEYMAW_FSR	Cu2C54H36N4O12	3.17449	6.23384	3.05935	-0.768327	2.29102	108	CSD						FALSE	FALSE	FALSE
qmof-1f389ca	CICYET_FSR	Cu2C14H20O20	3.56064	7.78783	4.22719	-1.51982	2.70737	56	CSD						FALSE	FALSE	FALSE
qmof-8045d77	CIDGOO_FSR	Cu2C32H28N4O8	2.57347	6.43195	3.85848	-2.8736	0.984877	74	CSD						FALSE	FALSE	FALSE
qmof-1ef74a7	CIDMOU_FSR	Cu4C80H56N16O12S4	3.46204	5.88838	2.42634	-1.33441	1.09193	172	CSD						TRUE	TRUE	FALSE
qmof-0d1ec57	CIDZOG_FSR	Ni2C44H44N8O16	1.95433	5.65407	3.69974	-0.898226	2.80151	114	CSD						FALSE	FALSE	FALSE
qmof-c16648b	CIFGIJ_FSR	Cu4C24H32N8O16S4	3.17469	6.6302	3.45552	-0.53376	2.92176	88	CSD						FALSE	FALSE	FALSE
qmof-3d08513	CIHHOR_FSR	Fe4C8H20O24P4	4.55747	7.47376	2.91629	-1.5385	1.37779	60	CSD						FALSE	FALSE	FALSE
qmof-e4b5afc	CIHLOW_FSR	Cu2C36H36N4O12P4	2.58308	6.11347	3.53039	-0.800426	2.72996	94	CSD						FALSE	FALSE	FALSE
qmof-db10139	CIHLUC_FSR	Cu2C36H36N4O12P4	3.05924	6.25977	3.20053	-0.714214	2.48632	94	CSD						FALSE	FALSE	FALSE
qmof-ad34906	CIHMEN_FSR	Cu2C40H36N4O12P4	2.68629	6.25497	3.56867	-0.780405	2.78827	98	CSD						FALSE	FALSE	FALSE
qmof-cbad0dc	CIHMUD_FSR	Cu2C32H28N4O8P2	2.31207	5.1785	2.86643	-0.527697	2.33873	76	CSD						FALSE	FALSE	FALSE
qmof-e436871	CIHRAN_FSR	Cu4C48H32N12O32	3.36935	6.62231	3.25296	-0.53127	2.72169	128	CSD						FALSE	FALSE	FALSE
qmof-2edfe81	CIJPAO_FSR	Ni4C112H120N8O40	2.89911	6.14628	3.24717	-1.11492	2.13226	284	CSD						FALSE	FALSE	FALSE
qmof-a1ad69d	CIKROF_FSR	Cu2C44H34I2N8O8	2.93933	6.61005	3.67071	-0.74986	2.92085	98	CSD						FALSE	FALSE	FALSE
qmof-0cad810	CILXIH01_FSR	Ni6C76H56N12O28	3.44863	6.21689	2.76826	-1.49222	1.27604	178	CSD						FALSE	FALSE	FALSE
qmof-0162588	CISXAE_FSR	U2C44H28O14	3.64749	6.02645	2.37895	-0.35134	2.02761	88	CSD						TRUE	TRUE	FALSE
qmof-3dcb1ed	CITBIS_FSR	Cu2C52H44N24O28	4.07604	7.39955	3.32351	-1.50035	1.82317	150	CSD						FALSE	FALSE	FALSE
qmof-2d4f3d7	CIVBER_FSR	Cu2C28F12H32O16	3.03671	6.80285	3.76614	-1.38398	2.38216	90	CSD						FALSE	FALSE	FALSE
qmof-09230cc	CIXZIS_FSR	Cu4C72H80N8O32S8	3.45049	7.05523	3.60474	-2.01262	1.59212	204	CSD						FALSE	FALSE	FALSE
qmof-6d32b28	CIZXER_FSR	Mn2C16H16N12S4	1.79704	5.20327	3.40623	0.613776	4.02	50	CSD						FALSE	FALSE	FALSE
qmof-633815b	CMEPCU_FSR	Cu4C20Cl8H20N16S4	3.4352	5.76678	2.33158	1.07529	3.40687	72	CSD						TRUE	TRUE	FALSE
qmof-0e16ae3	CNPRCV_FSR	Cu4C48H40N16O8	2.76006	6.59994	3.83988	-1.0282	2.81168	116	CSD						FALSE	FALSE	FALSE
qmof-01aff47	COCYUP_FSR	Cu2C52H48N4O12	3.05058	6.65609	3.60551	-1.23627	2.36924	118	CSD						FALSE	FALSE	FALSE
qmof-0fbdbe2	COFNOB_FSR	Co2C40H56N8O12	2.11497	5.9525	3.83754	-0.484548	3.35299	118	CSD						FALSE	FALSE	FALSE
qmof-26780e7	COHGOW_FSR	Ni2C42H28N4O14	2.89041	6.46731	3.5769	-1.06007	2.51682	90	CSD						FALSE	FALSE	FALSE
qmof-48d242f	COJLET_FSR	Cu4C72H56N16O24S4	2.92689	6.55316	3.62627	-2.00363	1.62264	176	CSD						FALSE	FALSE	FALSE
qmof-88da678	COJQEY_FSR	Cu2C30H20N12O2	2.92267	5.74658	2.82391	-0.390928	2.43298	66	CSD						FALSE	FALSE	FALSE
qmof-f564469	COJWUT_FSR	Cu2C24H44O10	2.56255	6.56578	4.00323	-2.49511	1.50811	80	CSD						FALSE	FALSE	FALSE
qmof-f198a27	COKDAI_FSR	Cd4C80H80N16O20S4	4.02121	6.81943	2.79822	-1.5779	1.22032	204	CSD						FALSE	FALSE	FALSE
qmof-60ed3b0	COKGAK_FSR	Cu2C28H52O10	2.78888	6.78114	3.99226	-2.42656	1.5657	92	CSD						FALSE	FALSE	FALSE
qmof-f04f83a	CONXEI01_FSR	Cu2Sr2C8H8O16	2.89546	7.05462	4.15916	-1.50906	2.6501	36	CSD						FALSE	FALSE	FALSE
qmof-e2db1dc	core_AGUWUV_freeONLY	Ni3C20H16N12O12	3.5725	6.9912	3.41871	-1.26275	2.15595	63	CoRE						FALSE	FALSE	FALSE
qmof-d5ed185	core_AJINOY_freeONLY	Cu2C52H44N8O12	2.39156	6.08927	3.69771	-1.27554	2.42218	118	CoRE						FALSE	FALSE	FALSE
qmof-402c9c0	core_ARAHIM01_freeONLY	Nb2Ni2C16F10H16N8O2	4.10177	6.41721	2.31544	-1.06674	1.2487	56	CoRE						FALSE	FALSE	FALSE
qmof-b5d33ff	core_ASUJIJ_freeONLY	Zn8C96H56N40O32	4.08155	6.70519	2.62364	-2.21586	0.407784	232	CoRE						FALSE	FALSE	FALSE
qmof-1c69162	core_ATIXAE_freeONLY	Tb4C112H72N12O32S12	4.54072	6.94198	2.40127	-2.6569	-0.25563	244	CoRE						FALSE	FALSE	FALSE
qmof-91b0193	core_BEXPAX_freeONLY	Ni3C60H60N6O24	3.89197	5.45616	1.56419	-2.04788	-0.483694	153	CoRE						FALSE	FALSE	FALSE
qmof-b68a0ad	core_BEZDUH_freeONLY	Ag6Mn2C18H14N16O2	2.99343	6.19867	3.20524	-0.777166	2.42807	58	CoRE						FALSE	FALSE	FALSE
qmof-13889cb	core_BUSNAF_freeONLY	Co3C78H60N30	1.8185	4.74225	2.92374	-0.629833	2.29391	171	CoRE						FALSE	FALSE	FALSE
qmof-23d6b4a	core_BUSRUE_freeONLY	Cd4C152H80N16O32	4.96128	6.78549	1.82421	-2.8271	-1.00289	284	CoRE						FALSE	FALSE	FALSE
qmof-5113051	core_CIVTEH_freeONLY	Cu4C96H48N24O20	3.83587	7.23379	3.39792	-2.79623	0.601687	192	CoRE						FALSE	FALSE	FALSE
qmof-d76f8fd	core_COQJAV_freeONLY	Mn6C150H132N24O24	1.88556	5.27213	3.38657	-1.12287	2.2637	336	CoRE						FALSE	FALSE	FALSE
qmof-9690414	core_DIBPIP_freeONLY	Ni4C82H56N20O22	3.04823	6.23329	3.18506	-1.75053	1.43453	184	CoRE						FALSE	FALSE	FALSE
qmof-a67dee3	core_ENITAX_freeONLY	Cu4C56H32O16Si2	3.41245	7.07578	3.66334	-5.29747	-1.63414	110	CoRE						FALSE	FALSE	FALSE
qmof-3459f4d	core_FALQEQ_freeONLY	Cu3La2C36H54N6O24	1.92513	5.99147	4.06634	-1.06752	2.99883	125	CoRE						FALSE	FALSE	FALSE
qmof-511e8da	core_FALQOA_freeONLY	Cu3Nd2C36H54N6O24	1.92958	5.98085	4.05127	-1.27276	2.77851	125	CoRE						FALSE	FALSE	FALSE
qmof-64fe339	core_FARBIL_freeONLY	V4C40H32O20	3.37129	6.4923	3.12101	-2.62639	0.494619	96	CoRE						FALSE	FALSE	FALSE
qmof-b5a4fdc	core_FUWYAY_freeONLY	Mn8C4H20N20O24S4	1.4978	5.60646	4.10866	0.052725	4.16139	80	CoRE						FALSE	FALSE	FALSE
qmof-6236874	core_GAXQIH_freeONLY	Ni4C84H52N28O16	2.24569	5.72196	3.47627	-1.11357	2.36269	184	CoRE						FALSE	FALSE	FALSE
qmof-80adb76	core_GIRZAK_freeONLY	Zn6C80H52N12O28	3.80699	6.03483	2.22784	-1.02867	1.19917	178	CoRE						FALSE	FALSE	FALSE
qmof-8d7621b	core_GITTOT_manual	Co6C48H60N24	2.26306	5.99482	3.73176	-2.95371	0.778051	138	CoRE						FALSE	FALSE	FALSE
qmof-42e8bf9	core_GIYTAK_freeONLY	Cd3C36H42N4O14	3.13185	5.97711	2.84525	-2.97176	-0.126506	99	CoRE						FALSE	FALSE	FALSE
qmof-1009afb	core_GIYTIS_SL	Zn3C30H28N2O12	3.75975	6.43337	2.67362	-3.67352	-0.999902	75	CoRE						FALSE	FALSE	FALSE
qmof-fbdc467	core_GOLYOX_freeONLY	Ni6C148H96N8O40S6	2.98049	6.44767	3.46718	-1.59162	1.87557	304	CoRE						FALSE	FALSE	FALSE
qmof-a4d16f2	core_HAJYEZ_freeONLY	Ni4C44H32O22	2.92345	6.82113	3.89768	-1.76142	2.13626	102	CoRE						FALSE	FALSE	FALSE
qmof-05cc789	core_HAMRIY_freeONLY	Cu6Ho4C48H60N12O48	2.17139	6.25151	4.08012	-2.01207	2.06806	178	CoRE						FALSE	FALSE	FALSE
qmof-7901ba3	core_HEGNIR_freeONLY	Ga9Mn3C24H78N18O48P12	3.28954	7.38273	4.09319	-1.62223	2.47096	192	CoRE						FALSE	FALSE	FALSE
qmof-04bf78f	core_HIGRIA_freeONLY	Co2Zn8C84H54N36O12	2.64503	4.99922	2.35419	-2.69089	-0.336703	196	CoRE						FALSE	FALSE	FALSE
qmof-e8a6a82	core_HIHFOV_freeONLY	Ni2C72H52N16	3.02921	5.36263	2.33342	-0.759796	1.57362	142	CoRE						FALSE	FALSE	FALSE
qmof-3172fe0	core_HIYYEU_freeONLY	Mo2Ni4C80H144N32	1.91356	5.48829	3.57472	-0.861894	2.71283	262	CoRE						FALSE	FALSE	FALSE
qmof-f818993	core_HOBGEL_freeONLY	Ni2C23H21N5O8	2.448	5.33888	2.89088	-1.36056	1.53032	59	CoRE						FALSE	FALSE	FALSE
qmof-37419af	core_HOXSUK_freeONLY	Ni6C88H64O28	2.68547	5.71075	3.02528	-1.59604	1.42925	186	CoRE						FALSE	FALSE	FALSE
qmof-a5a3523	core_IBASEL_freeONLY	Cu6La4C48H60N12O48	2.18964	6.29443	4.10479	-1.89997	2.20481	178	CoRE						FALSE	FALSE	FALSE
qmof-db61142	core_IBASOV_freeONLY	Cu6Nd4C48H60N12O48	2.15258	6.2475	4.09491	-2.09288	2.00204	178	CoRE						FALSE	FALSE	FALSE
qmof-1f95408	core_IFUNUU_freeONLY	Tb4C72F4H56N4O32	4.76962	7.37578	2.60616	-2.39539	0.210779	172	CoRE						FALSE	FALSE	FALSE
qmof-05f7938	core_ILIMOH_freeONLY	Ni3C72H48N30	1.72267	5.18224	3.45957	-1.47995	1.97962	153	CoRE						FALSE	FALSE	FALSE
qmof-76a0d99	core_ILIMUN_freeONLY	Ni3C72H48N30	2.2788	5.71505	3.43625	-1.58135	1.8549	153	CoRE						FALSE	FALSE	FALSE
qmof-7bfdb52	core_ISIKOL_freeONLY	Co4C76H76N16O20	1.92933	5.78138	3.85205	-1.17047	2.68158	192	CoRE						FALSE	FALSE	FALSE
qmof-2d6d0e3	core_IYICUP_freeONLY	Co4La4C144H72N24O48	3.48916	6.25999	2.77082	-3.36042	-0.589601	296	CoRE						FALSE	FALSE	FALSE
qmof-66c3285	core_IYOCIK_freeONLY	Zn12C144H96I24N48	3.79658	6.16666	2.37008	-2.94143	-0.571346	324	CoRE						FALSE	FALSE	FALSE
qmof-437d9f5	core_KASPOL_freeONLY	Cu2C16H20O12P4	3.39252	7.3569	3.96438	-1.79381	2.17057	54	CoRE						FALSE	FALSE	FALSE
qmof-35c161a	core_KIYMIP_freeONLY	Ni4C78F12H52N8O20	3.75039	6.77333	3.02294	-1.52443	1.49851	174	CoRE						FALSE	FALSE	FALSE
qmof-571d405	core_KOJZEP_manual	Cu6C96H36N12O24	4.69288	8.55705	3.86417	-6.32361	-2.45944	174	CoRE						FALSE	FALSE	FALSE
qmof-8281b85	core_KONYOB_freeONLY	Cd2Ni2C26H42N12	1.95509	4.66171	2.70662	-0.570385	2.13624	84	CoRE						FALSE	FALSE	FALSE
qmof-38e0c3c	core_LIJNOJ01_freeONLY	Mn8C192H128N16O32	2.31121	5.3832	3.07199	-0.868881	2.2031	376	CoRE						FALSE	FALSE	FALSE
qmof-f26628c	core_LOBHAM_freeONLY	Ni6C60H52N24O28	1.63939	5.6909	4.05152	-2.78193	1.26959	170	CoRE						FALSE	FALSE	FALSE
qmof-71d890d	core_LUDVIP_freeONLY	Zn12C144H96I24N48	3.58705	5.72655	2.1395	-1.92505	0.214444	324	CoRE						TRUE	TRUE	FALSE
qmof-8b50b3f	core_LUYHAP_freeONLY	Cu6C60H30O30	3.46016	6.3164	2.85624	-4.26506	-1.40882	126	CoRE						FALSE	FALSE	FALSE
qmof-5a28a47	core_MAQJEW_freeONLY	Ni8C16H32N16O32	2.1056	6.14316	4.03757	-0.782273	3.25529	104	CoRE						FALSE	FALSE	FALSE
qmof-a7b40bb	core_MEMYAF_freeONLY	Hg4Mn4C16H8N16O4S16	3.36954	6.65265	3.28312	-2.17882	1.1043	68	CoRE						FALSE	FALSE	FALSE
qmof-5d60ff1	core_MUGQAI_freeONLY	Cu16C112H64N64	2.35599	4.77963	2.42365	0.723956	3.1476	256	CoRE						FALSE	FALSE	FALSE
qmof-eee201d	core_MUNNUF_freeONLY	Zn4C96H48N8O24	4.29667	6.30384	2.00718	-3.08989	-1.08272	180	CoRE						FALSE	FALSE	FALSE
qmof-651a0e2	core_MUNPER_freeONLY	Zn4C96H48N8O24	4.12775	6.18734	2.05959	-3.20546	-1.14587	180	CoRE						FALSE	FALSE	FALSE
qmof-e581c0e	core_NORJEL_freeONLY	Cd4C128H90N6O26	3.75609	5.72175	1.96566	-0.887987	1.07768	254	CoRE						TRUE	FALSE	FALSE
qmof-2ad6ccc	core_NUVYIN_freeONLY	Ni6C120H84N12O32	3.06989	5.97545	2.90556	-1.68698	1.21858	254	CoRE						FALSE	FALSE	FALSE
qmof-d21a0d9	core_OJIWAG_freeONLY	Zn8C160H80N16O48	4.0855	6.90397	2.81847	-3.4159	-0.597431	312	CoRE						FALSE	FALSE	FALSE
qmof-5108c60	core_OPOZEZ_freeONLY	Cd8C232H176N32O32	3.77362	6.0095	2.23589	-2.38142	-0.145532	480	CoRE						TRUE	FALSE	FALSE
qmof-3be1907	core_QIWCOQ_freeONLY	Cu4C84H52N16O16	3.47382	6.93692	3.46309	-2.84989	0.613206	172	CoRE						FALSE	FALSE	FALSE
qmof-94ab9a7	core_QOZGAP_freeONLY	Cu2C28H16N16O12	3.02985	6.87697	3.84712	-3.05784	0.789283	74	CoRE						FALSE	FALSE	FALSE
qmof-e62d92a	core_REYPIW_freeONLY	Zn3C38H24N12O8	3.8052	6.74531	2.94011	-2.62507	0.315044	85	CoRE						FALSE	FALSE	FALSE
qmof-295bfb2	core_ROHWOC_freeONLY	Cu4C108H100N16O24S4	3.16232	6.60692	3.44459	-1.85903	1.58556	256	CoRE						FALSE	FALSE	FALSE
qmof-5c4ddd4	core_RONSIY_freeONLY	Cu4C100H72N8O16	3.41116	6.57542	3.16426	-1.9364	1.22786	200	CoRE						FALSE	FALSE	FALSE
qmof-534ec49	core_RUBGUS_freeONLY	Mn4C48H32N8O20S8	2.77084	5.8605	3.08966	-0.77336	2.3163	120	CoRE						FALSE	FALSE	FALSE
qmof-3dfbcbd	core_RURPAW_freeONLY	FePtC8H4N6	3.43438	6.14974	2.71536	-1.68277	1.03259	20	CoRE						FALSE	FALSE	FALSE
qmof-f67a0ff	core_SEJBAL_freeONLY	Ni2C36H26N4O11	3.33284	6.43216	3.09932	-2.07958	1.01974	79	CoRE						FALSE	FALSE	FALSE
qmof-b5b8b3e	core_TADYEE_freeONLY	Mo2Ni4C64H120N40O8	1.79211	5.41261	3.6205	-1.59437	2.02613	238	CoRE						FALSE	FALSE	FALSE
qmof-ec8a9b7	core_UKUBOS_freeONLY	Mn4C100H104N16O16S8	1.31153	4.50572	3.19419	-1.15013	2.04405	248	CoRE						FALSE	FALSE	FALSE
qmof-308a75f	core_XOBXIW_freeONLY	Ni12C24H24O48	1.86618	7.16945	5.30327	-2.41532	2.88795	108	CoRE						FALSE	FALSE	FALSE
qmof-d47a2d7	core_YUPSIM_freeONLY	Pr8C96H68N20O72	3.62976	5.91972	2.28996	-0.014802	2.27515	264	CoRE						TRUE	TRUE	FALSE
qmof-2c0fa92	core_ZISYAD_freeONLY	Cu4C90H64I4N8	2.56255	4.72918	2.16663	-0.806174	1.36045	170	CoRE						FALSE	FALSE	FALSE
qmof-5206c61	core_ZURQOS_freeONLY	CdNiC12H10N6	3.69009	6.8785	3.18841	-3.48617	-0.297758	30	CoRE						FALSE	FALSE	FALSE
qmof-5e2dc9c	CORHAS06_FSR	Cu2C24H24N4O12S2	2.97302	6.51361	3.54059	-0.702952	2.83764	68	CSD						FALSE	FALSE	FALSE
qmof-206e25b	CORJIC_FSR	Cu2C10H8N6S2	2.70953	5.01009	2.30057	0.704927	3.00549	28	CSD						FALSE	FALSE	FALSE
qmof-85fa9ba	CORZAL_FSR	Cu2Mo6C20H16N4O24Te2	3.80501	6.56287	2.75786	0.41087	3.16873	74	CSD						FALSE	FALSE	FALSE
qmof-09a1847	CORZEP_FSR	Mo6Ni2C20H16N4O24Te2	3.88804	6.37696	2.48892	0.806456	3.29538	74	CSD						FALSE	FALSE	FALSE
qmof-fee2e35	COVVAM_FSR	CuC18H20N4O6	3.37716	7.03505	3.65789	-1.33355	2.32434	49	CSD						FALSE	FALSE	FALSE
qmof-95786c6	COWKIJ_FSR	Cu2C48Cl4H48N24	2.91263	6.79869	3.88606	-1.18656	2.6995	126	CSD						FALSE	FALSE	FALSE
qmof-720efb8	COWSAK_FSR	NiC44H30O18	2.67304	5.93926	3.26622	-0.413983	2.85223	93	CSD						FALSE	FALSE	FALSE
qmof-d6ddf36	COWVAN_FSR	Ni2C52Cl4H40N8S4	2.70286	6.18165	3.47879	-0.081624	3.39716	110	CSD						FALSE	FALSE	FALSE
qmof-5402e4d	COWVIU_FSR	Cu2Dy4C20H28N8O36S2	3.77706	7.82604	4.04898	-1.16342	2.88557	100	CSD						FALSE	FALSE	FALSE
qmof-27ecb45	COXTAM_FSR	CoC34Cl2H26N14	2.1028	5.31851	3.21571	0.159855	3.37557	77	CSD						FALSE	FALSE	FALSE
qmof-70a1fa1	COYCEZ_FSR	Cu12Mo4C176H164N36O4S16	3.18864	5.47799	2.28934	-0.084014	2.20533	412	CSD						FALSE	FALSE	FALSE
qmof-a077195	COYKEH_FSR	Cu4C28H28N16O4	2.60072	5.22886	2.62814	0.277442	2.90558	80	CSD						FALSE	FALSE	FALSE
qmof-d4dbf80	COZMEM_FSR	Co6C60H36N24	1.69006	5.12182	3.43176	-2.58311	0.848657	126	CSD						FALSE	FALSE	FALSE
qmof-749e21d	CUGVUW_FSR	Cu3C66H42N36	3.10277	6.77447	3.6717	-1.73249	1.93921	147	CSD						FALSE	FALSE	FALSE
qmof-05d14ae	CUHMAM01_FSR	Cu2C16H20O20	3.81477	7.9971	4.18233	-2.30167	1.88066	58	CSD						FALSE	FALSE	FALSE
qmof-6400cd1	CUMFUM_FSR	Cu4C72H56N16O16	2.72289	6.5304	3.80751	-1.62248	2.18503	164	CSD						FALSE	FALSE	FALSE
qmof-1e272e4	CUMREI_FSR	Fe4Zn2C104H88N8O12	2.926	5.38904	2.46304	-0.657831	1.80521	218	CSD						FALSE	FALSE	FALSE
qmof-9fd6fe0	CUMSEJ01_FSR	Cd2C72H56N8O8	2.9548	4.94606	1.99126	-0.421937	1.56932	146	CSD						FALSE	FALSE	FALSE
qmof-711c472	CUNFEX_FSR	Cu2C24H18I2N4O3	3.80933	6.28968	2.48036	1.00042	3.48078	53	CSD						FALSE	FALSE	FALSE
qmof-68f6f0b	CUNVEN_FSR	Cd2Co2C44H28N8O18	2.69142	6.67249	3.98107	-0.838832	3.14223	102	CSD						FALSE	FALSE	FALSE
qmof-ce1aea4	CUPWIV_FSR	Cu4C88H68I4N12O4	2.87467	4.98057	2.1059	-0.486516	1.61938	180	CSD						FALSE	FALSE	FALSE
qmof-930ace4	CUQXUJ_FSR	Cu2C50H38N6O14	3.07141	6.48115	3.40973	-1.94502	1.46471	110	CSD						FALSE	FALSE	FALSE
qmof-3328a0c	CUQYAQ_FSR	Cu2C54H38N6O12	2.56607	5.5878	3.02173	-1.84657	1.17516	112	CSD						FALSE	FALSE	FALSE
qmof-10b84fb	CUQZEV_FSR	K4V4C4H12O28P4	2.6664	6.35369	3.68728	-0.172294	3.51499	56	CSD						FALSE	FALSE	FALSE
qmof-76724f2	CURGUR_FSR	Cu4C48H36N16O4S4	2.57304	4.87973	2.30669	0.223321	2.53001	112	CSD						FALSE	FALSE	FALSE
qmof-9ae4bed	CUSGOO_FSR	NiC34H32N6O6S2	2.1888	5.98062	3.79182	-0.466228	3.3256	81	CSD						FALSE	FALSE	FALSE
qmof-54e279c	CUTMEL_FSR	Cd2C48F8H16N12	2.42192	4.41948	1.99755	0.504955	2.50251	86	CSD						FALSE	FALSE	FALSE
qmof-1e98fe6	CUTTIW_FSR	CuC14H10N12O4	2.80517	6.64524	3.84008	-1.32652	2.51356	41	CSD						FALSE	FALSE	FALSE
qmof-77aef10	CUVCOM_FSR	U4C56H32O24S8	3.85709	6.21212	2.35503	0.134498	2.48953	124	CSD						FALSE	FALSE	FALSE
qmof-e987c82	CUVFAB_FSR	Ag8C120H96N16O16	2.64132	4.96941	2.32809	-0.485452	1.84264	256	CSD						FALSE	FALSE	FALSE
qmof-bdde1f9	CUWRAO_FSR	Ag4Nb4C16F16H16N8O4	3.94474	6.79458	2.84985	0.004221	2.85407	68	CSD						FALSE	FALSE	FALSE
qmof-cad0a5d	CUWRES_FSR	Cu2Nb2C20F8H16N4O2	2.63043	4.86419	2.23377	-0.035469	2.1983	54	CSD						FALSE	FALSE	FALSE
qmof-3c5c124	CUYDAC_FSR	Cu2C36H28N8O8S4	3.02845	6.15108	3.12263	-0.156705	2.96592	86	CSD						FALSE	FALSE	FALSE
qmof-beb45ec	DABXOW_FSR	Zn2C64F8H32N16	3.25747	5.21595	1.95848	0.108634	2.06711	122	CSD						FALSE	FALSE	FALSE
qmof-9c78145	DACMUQ_FSR	Ba2NiC6H14O16	1.40804	6.34085	4.93282	-0.973898	3.95892	39	CSD						FALSE	FALSE	FALSE
qmof-3c04d40	DAHBIA_FSR	Cu2C46H38I2N2P2	2.88163	5.16515	2.28352	0.412596	2.69611	92	CSD						FALSE	FALSE	FALSE
qmof-6b21d44	DAKJOQ_FSR	Cu2C34H28N4O12S2	3.55335	7.24927	3.69592	-1.47698	2.21895	82	CSD						FALSE	FALSE	FALSE
qmof-8491731	DAKMIN_FSR	Mn2C52H32N4O10	3.08965	5.84183	2.75218	0.187776	2.93996	100	CSD						FALSE	FALSE	FALSE
qmof-3f6db6f	DAMTUJ_FSR	CuC26H38N4O8	2.28247	6.29355	4.01108	-1.52226	2.48882	77	CSD						FALSE	FALSE	FALSE
qmof-64f190e	DANGAD_FSR	CuC58H36N6O10	2.53126	5.88307	3.35181	-0.690572	2.66123	111	CSD						FALSE	FALSE	FALSE
qmof-d1ed4a4	DAVXIJ_FSR	Co2C48H44N8O8	1.81255	5.67102	3.85848	-0.777183	3.08129	110	CSD						FALSE	FALSE	FALSE
qmof-f2717c4	DAWCOV_FSR	Mn6C88H60O28	2.41177	5.59929	3.18752	-2.13212	1.0554	182	CSD						FALSE	FALSE	FALSE
qmof-f9b83bc	DAWWIJ_FSR	Mn12C64H64N40O48	2.50996	5.90814	3.39818	-0.408437	2.98975	228	CSD						FALSE	FALSE	FALSE
qmof-93ec4e0	DAXWIJ_FSR	Co2Ni2C32H16N12	3.10479	6.34112	3.23633	-0.221346	3.01498	64	CSD						FALSE	FALSE	FALSE
qmof-9d71d13	DAXWOP_FSR	Co2Ni2C28H16N12	3.28303	6.63433	3.3513	-0.132478	3.21883	60	CSD						FALSE	FALSE	FALSE
qmof-9c8ecba	DAYCEN_FSR	Cu4C76H56N16O16	2.89726	6.70822	3.81096	-2.17933	1.63163	168	CSD						FALSE	FALSE	FALSE
qmof-1c14e71	DAYTAZ_FSR	Cu4C64H52N12O20S4	2.70362	6.33179	3.62817	-2.07597	1.5522	156	CSD						FALSE	FALSE	FALSE
qmof-914130f	DBUPCU_FSR	Cu2C32H72O8P4	2.40258	6.3679	3.96532	-2.09066	1.87466	118	CSD						FALSE	FALSE	FALSE
qmof-41aa483	DECCOE_FSR	CuC28H28N10O6	2.35213	6.45441	4.10227	-1.08197	3.0203	73	CSD						FALSE	FALSE	FALSE
qmof-40093f4	DECWIS_FSR	Cu4C28H40N4O8P4S8	2.63053	4.71255	2.08202	0.855023	2.93705	96	CSD						FALSE	FALSE	FALSE
qmof-642b86d	DECWUE_FSR	Cu2C18H28N2O4P2S4	3.65607	5.69153	2.03546	0.548198	2.58366	60	CSD						TRUE	FALSE	FALSE
qmof-2dae2b6	DEDLAC_FSR	Cu2C36H24N12O8	2.67377	6.67314	3.99937	-1.70249	2.29688	82	CSD						FALSE	FALSE	FALSE
qmof-bf979d0	DEDWOB_FSR	Cu2C20H24N4O12S4	3.11786	7.39538	4.27752	-1.4465	2.83102	66	CSD						FALSE	FALSE	FALSE
qmof-173e029	DEFNOU_FSR	Ni9C15Cl3H21O33	2.40179	6.691	4.28922	-0.543012	3.7462	81	CSD						FALSE	FALSE	FALSE
qmof-31a720c	DEFYIX_FSR	Cu2C32H32N4O10	3.45008	7.22678	3.7767	-1.3851	2.3916	80	CSD						FALSE	FALSE	FALSE
qmof-9c01853	DEGSIS01_FSR	Cu4C48H32N8O16	2.85616	6.93423	4.07807	-1.58329	2.49478	108	CSD						FALSE	FALSE	FALSE
qmof-36d19a8	DEKFOQ_FSR	Cu4C48H28N8O16	3.1298	6.7129	3.5831	-1.38512	2.19797	104	CSD						FALSE	FALSE	FALSE
qmof-87bcdf8	DEKQUF_FSR	Cd4C60H48N32O24	5.06015	8.10993	3.04978	-2.27843	0.771349	168	CSD						FALSE	FALSE	FALSE
qmof-7ae1c7d	DEKVAS02_FSR	Fe2Br4C48H28N20	2.75554	5.21129	2.45575	0.372551	2.8283	102	CSD						FALSE	FALSE	FALSE
qmof-c3ff310	DENTAS_FSR	CoC13Cl2H14N2	2.29534	5.75181	3.45647	0.273893	3.73037	32	CSD						FALSE	FALSE	FALSE
qmof-a0be11a	DENZIG_FSR	Ni2C14H14N2O12	2.98716	6.97139	3.98423	-1.07665	2.90758	44	CSD						FALSE	FALSE	FALSE
qmof-44525cd	DEWLOJ_FSR	Ag2C26H18N4O6S12	2.63946	4.45695	1.81748	2.36658	4.18406	68	CSD						FALSE	FALSE	FALSE
qmof-62c9574	DEYJIC_FSR	Ni2V4C36H34N6O14	3.25235	6.24062	2.98827	-0.863778	2.12449	96	CSD						FALSE	FALSE	FALSE
qmof-ce2d153	DEYXOX_FSR	Cu2Br4C20H32N32O12	3.80928	7.81639	4.00711	-1.61688	2.39023	102	CSD						FALSE	FALSE	FALSE
qmof-f645d00	DEYYEO_FSR	Cu2Br4C8H16N16O12	3.76112	7.92345	4.16234	-1.4051	2.75724	58	CSD						FALSE	FALSE	FALSE
qmof-d6f338e	DEZPUU_FSR	Cu8W24C80H64N16O80Si2	4.41407	6.45384	2.03977	-0.405814	1.63395	274	CSD						FALSE	FALSE	FALSE
qmof-8f835a4	DIBWUI_FSR	Cu2Tb2C32H20N10O18	3.12795	7.17137	4.04342	-2.05756	1.98586	84	CSD						FALSE	FALSE	FALSE
qmof-d0a1c03	DIBXAP_FSR	Cu2Ho2C32H20N10O18	3.16222	7.20642	4.0442	-2.07996	1.96424	84	CSD						FALSE	FALSE	FALSE
qmof-75de2e0	DIBXET_FSR	Cu2Gd2C32H20N10O18	2.77331	6.70885	3.93554	-1.93073	2.00481	84	CSD						FALSE	FALSE	FALSE
qmof-3e7238d	DIBXOD_FSR	Cu2Dy2C32H20N10O18	3.16646	7.20668	4.04021	-2.05032	1.98989	84	CSD						FALSE	FALSE	FALSE
qmof-c0f392b	DIDDIE_FSR	Zn2C44H38N6O12	3.67847	6.15572	2.47725	-3.43277	-0.955519	102	CSD						TRUE	FALSE	FALSE
qmof-74b1a87	DIHFAD_FSR	Mn2PtC38H28N10O4S6	4.27936	6.1434	1.86405	-0.146188	1.71786	89	CSD						FALSE	FALSE	FALSE
qmof-63f404f	DIHQET_FSR	U2C28H16I4O12	4.18576	6.67358	2.48782	0.184611	2.67243	62	CSD						FALSE	FALSE	FALSE
qmof-de95770	DIKRAR_FSR	Cu2C38H28N4O6	2.53087	5.69747	3.16661	-1.49738	1.66923	78	CSD						FALSE	FALSE	FALSE
qmof-59b7a9f	DIKZED_FSR	Mn6C24H36O36	2.76346	6.01199	3.24853	-0.402474	2.84605	102	CSD						FALSE	FALSE	FALSE
qmof-d15d784	DIMBIM_FSR	Cu8Br8C36H40N12	2.87589	5.56294	2.68705	0.217943	2.90499	104	CSD						FALSE	FALSE	FALSE
qmof-23596df	DIMQEX_FSR	Zn8C232F48H112N16O48	4.25317	6.83165	2.57849	-4.39557	-1.81709	464	CSD						FALSE	FALSE	FALSE
qmof-116061c	DINYEG01_FSR	K4C28H28N8O20	4.10604	6.23699	2.13095	-0.440981	1.68997	88	CSD						FALSE	FALSE	FALSE
qmof-03090a5	DIPFIR_FSR	Cu4C20H24I4N8	3.01725	5.39093	2.37368	1.34435	3.71804	60	CSD						FALSE	FALSE	FALSE
qmof-7e5c22f	DIWCUJ_FSR	Ag8C56H44N12O24	3.62777	6.26544	2.63767	0.121114	2.75878	144	CSD						FALSE	FALSE	FALSE
qmof-0b6ef72	DIZDAT_FSR	Pb4C52H40N24O12S4	3.18965	5.58078	2.39113	-1.34976	1.04137	136	CSD						FALSE	FALSE	FALSE
qmof-ec3c0e8	DIZYIV_FSR	Cu4C40Cl4H32N8	2.28125	4.59118	2.30992	1.01605	3.32597	88	CSD						FALSE	FALSE	FALSE
qmof-b0f5ecd	DIZYOB_FSR	Cu4Br4C20H16N4	1.86319	4.53138	2.66819	0.89709	3.56528	48	CSD						FALSE	FALSE	FALSE
qmof-8a8d2e8	DOBFAC_FSR	Ni2C48H40N4O12	2.75266	7.02922	4.27656	-1.16791	3.10865	106	CSD						FALSE	FALSE	FALSE
qmof-ecac71f	DOBFAC01_FSR	Ni2C48H40N4O12	2.6976	6.79386	4.09627	-0.848906	3.24736	106	CSD						FALSE	FALSE	FALSE
qmof-c2a60c1	DOBFUW_FSR	Cu2C48H32N4O8	2.79294	6.71485	3.92191	-1.26252	2.65939	94	CSD						FALSE	FALSE	FALSE
qmof-8ce3f11	DOCJEL_FSR	Cs4C20H8N12O24	3.96442	5.93614	1.97173	-0.060922	1.9108	68	CSD						FALSE	FALSE	FALSE
qmof-104309e	DOCQOC_FSR	Cd2Ce2C42H34N6O32	5.15598	8.04972	2.89374	-2.40517	0.488576	118	CSD						FALSE	FALSE	FALSE
qmof-c10e1fd	DODPIV_FSR	Cu2Pt2C28H16N12	3.34032	7.07307	3.73275	-0.998495	2.73426	60	CSD						FALSE	FALSE	FALSE
qmof-7b3d567	DODQIX_FSR	Cu4Mo8C44H32N8O30	3.92152	6.08401	2.16249	0.740867	2.90336	126	CSD						FALSE	FALSE	FALSE
qmof-c6cd4fd	DOFWIF_FSR	Ni2C24H32N8O12	2.30261	6.10742	3.8048	-0.868927	2.93587	78	CSD						FALSE	FALSE	FALSE
qmof-9fbe71b	DOFWUR_FSR	Ba2C20H24N12O32	4.51526	6.67655	2.16129	-0.763023	1.39827	90	CSD						FALSE	FALSE	FALSE
qmof-71a0ea3	DOGMES_FSR	Co2C50H46N8O8	3.53592	7.13651	3.60059	-1.98457	1.61602	114	CSD						FALSE	FALSE	FALSE
qmof-3b1c2bf	DOLCUD_FSR	Cu2C40H32N8O12S4	3.15698	7.1021	3.94512	-2.14442	1.8007	98	CSD						FALSE	FALSE	FALSE
qmof-09cb4ce	DOPKOK_FSR	Cu2C32H28N20O10	3.16587	7.109	3.94313	-1.30004	2.64309	92	CSD						FALSE	FALSE	FALSE
qmof-4c15177	DORGUO_FSR	Ni4C92H60N8O16	3.30887	6.22846	2.91959	-1.11424	1.80535	180	CSD						FALSE	FALSE	FALSE
qmof-8b5bb88	DOTSOV01_FSR	Cu12C72H24O48	5.24662	6.10812	0.8615	-3.74897	-2.88747	156	CSD						FALSE	FALSE	FALSE
qmof-ddec51e	DOWHII_FSR	CuC26H26N4O4	2.79588	6.54217	3.7463	-1.56719	2.17911	61	CSD						FALSE	FALSE	FALSE
qmof-d0bf550	DOYBUQ01_FSR	Fe4Pt4C48H32N24S4	3.16215	5.87626	2.71411	-0.016917	2.6972	116	CSD						FALSE	FALSE	FALSE
qmof-e6fc101	DOZQUF_FSR	Cu4C12H28N4O24S4	2.87979	7.19273	4.31294	-0.898341	3.4146	76	CSD						FALSE	FALSE	FALSE
qmof-aa12b02	DUBKAO_FSR	Ni4C68H40N12O16	3.22481	6.02284	2.79803	-2.08674	0.711293	140	CSD						FALSE	FALSE	FALSE
qmof-857c2d1	DUHQON_FSR	CuC16H16N4O4	2.24704	6.12228	3.87525	-1.24033	2.63492	41	CSD						FALSE	FALSE	FALSE
qmof-1681ab3	DUJRAD_FSR	Ba4Cu4C60H52N4O40S8	2.8585	6.7984	3.9399	-2.45683	1.48307	172	CSD						FALSE	FALSE	FALSE
qmof-eef9492	DUMFEY_FSR	NiC8F6H8N4Si	4.32005	7.15173	2.83168	-1.92574	0.905945	28	CSD						FALSE	FALSE	FALSE
qmof-be643de	DUMMAB_FSR	Cu4C40H32N16O16	2.8456	6.72712	3.88151	-1.28811	2.59341	108	CSD						FALSE	FALSE	FALSE
qmof-18925a4	DUXKIR_FSR	U2C20H34N4O18	3.26625	6.19448	2.92823	-0.3323	2.59593	78	CSD						FALSE	FALSE	FALSE
qmof-c0d0be0	DUXMIT_FSR	Co2C28H20N4O12	3.56154	6.86224	3.3007	-0.839447	2.46125	66	CSD						FALSE	FALSE	FALSE
qmof-70b2910	DUYPUK_FSR	Cu4C24H20N16O8S4	3.25888	5.36906	2.11018	0.796066	2.90625	76	CSD						FALSE	FALSE	FALSE
qmof-b053c87	DUYSIC_FSR	Cu4C96H88N16O16	2.85862	6.59688	3.73826	-2.76328	0.974974	220	CSD						FALSE	FALSE	FALSE
qmof-b9e9c9e	EBASIK_FSR	Cu2Hg2C34Cl4H22N10	3.23473	6.84462	3.60989	-1.25872	2.35116	74	CSD						FALSE	FALSE	FALSE
qmof-df90041	EBAWAI_FSR	Ni3C60H46N12O16	2.02522	5.82548	3.80026	-0.707727	3.09254	137	CSD						FALSE	FALSE	FALSE
qmof-374a046	EBINEK_FSR	Cu2C20H36N12O12	2.50038	6.81219	4.31181	-1.88523	2.42659	82	CSD						FALSE	FALSE	FALSE
qmof-f9c3fbb	EBIPEM_FSR	Cu2C32H32N12O8	2.61074	6.56694	3.9562	-1.37415	2.58205	86	CSD						FALSE	FALSE	FALSE
qmof-0f66a7d	EBIVAO_FSR	Zn2C34Cl6H18N4O6	3.56009	5.81377	2.25368	-0.636995	1.61668	70	CSD						TRUE	TRUE	FALSE
qmof-3e210ac	EBOFAD_FSR	CoC28H24N6S2	2.94081	5.90384	2.96303	0.056824	3.01986	61	CSD						FALSE	FALSE	FALSE
qmof-b7479eb	EBOKAI_FSR	Ni2C44H36N4O12	2.77328	6.02953	3.25624	-0.471548	2.7847	98	CSD						FALSE	FALSE	FALSE
qmof-3288dd3	ECAWIQ_FSR	Cu4C28H32N8O16	2.07987	6.14473	4.06485	-1.01918	3.04568	88	CSD						FALSE	FALSE	FALSE
qmof-762bfda	ECAWUC_FSR	Cu4C60H60N4O16	1.92685	5.9012	3.97435	-0.716253	3.25809	144	CSD						FALSE	FALSE	FALSE
qmof-99503b5	ECAZUG_FSR	Cu4Br4C36H36N12	3.15322	5.59992	2.4467	0.674855	3.12156	92	CSD						FALSE	FALSE	FALSE
qmof-56bffcf	ECULEU_FSR	Cu2C32H32N20S4	2.44381	5.91627	3.47247	-0.184447	3.28802	90	CSD						FALSE	FALSE	FALSE
qmof-ac0b22d	ECUVUV_FSR	CuC22H20N4O12	3.75882	7.21545	3.45663	-1.91715	1.53948	59	CSD						FALSE	FALSE	FALSE
qmof-2f09f08	EDOXEB_FSR	Cu2Na4C20H40N4O22	2.30247	6.26382	3.96135	-1.20188	2.75947	92	CSD						FALSE	FALSE	FALSE
qmof-9f89994	EFABOF_FSR	Cu2Br2C48H36N12O6	3.22007	5.55164	2.33158	-0.113478	2.2181	106	CSD						FALSE	FALSE	FALSE
qmof-d9c6d97	EFEBIB_FSR	Cu6Mo2Br4C56H66N6S6	2.46435	4.83704	2.37269	-0.509869	1.86282	146	CSD						FALSE	FALSE	FALSE
qmof-b01516c	EFUMUN_FSR	Cu2Mo2C22H24N4O18P4	4.02367	7.72229	3.69862	-0.333218	3.3654	76	CSD						FALSE	FALSE	FALSE
qmof-d689f74	EGEMIO_FSR	NiPt2C56Cl2H60N8	3.12476	6.3433	3.21854	-0.637867	2.58067	129	CSD						FALSE	FALSE	FALSE
qmof-5500d18	EGUMEY01_FSR	Ni4C48H32N8O20	3.60189	6.693	3.09111	-0.841207	2.2499	112	CSD						FALSE	FALSE	FALSE
qmof-e0cfb23	EHOQOH01_FSR	Cu2FeC12H8N8	2.5187	5.52995	3.01126	0.254515	3.26577	31	CSD						FALSE	FALSE	FALSE
qmof-44435b0	EHUJUN_FSR	Cu4C24H20N8O16	3.76606	7.13803	3.37198	-1.00223	2.36975	72	CSD						FALSE	FALSE	FALSE
qmof-2d1b778	EJANOU_FSR	Mn2C40H28N4O8	2.03841	5.12245	3.08404	-0.68323	2.40081	82	CSD						FALSE	FALSE	FALSE
qmof-6d69c36	EJEBOL01_FSR	Mn4C24H32N8O24	2.61742	5.68604	3.06861	-0.104988	2.96363	92	CSD						FALSE	FALSE	FALSE
qmof-0c10f91	EJIQIX_FSR	Cu4C28H40N32	2.94736	6.76626	3.8189	-1.33165	2.48725	104	CSD						FALSE	FALSE	FALSE
qmof-88d427b	EJOCEM_FSR	Ba2Co2C16H26N2O20	1.65334	6.54775	4.8944	-0.663559	4.23084	68	CSD						FALSE	FALSE	FALSE
qmof-e2af422	EJOGOZ_FSR	Cu6C102H72N12O18	2.85418	5.53062	2.67644	-1.9364	0.740037	210	CSD						FALSE	FALSE	FALSE
qmof-c376f20	EKANIO_FSR	Cu2C52H28N8O8	2.93375	5.99393	3.06018	-0.473885	2.5863	98	CSD						FALSE	FALSE	FALSE
qmof-e25f3a3	EKAWUJ_FSR	CuC34H30N12O16	3.09141	7.27176	4.18035	-1.37137	2.80898	93	CSD						FALSE	FALSE	FALSE
qmof-1750ab0	EKIJAL_FSR	Ni6C44H40O28	2.7893	6.41761	3.62831	-0.103298	3.52501	118	CSD						FALSE	FALSE	FALSE
qmof-e49dfd4	EKINOB_FSR	Cu2C8Cl2H8N4	2.54835	4.78869	2.24034	1.0619	3.30224	24	CSD						FALSE	FALSE	FALSE
qmof-4f9c014	EKUDIX01_FSR	Cu2C40H40N4O8	1.53358	5.56458	4.03099	-3.24729	0.783707	94	CSD						FALSE	FALSE	FALSE
qmof-d65a785	EKUDUJ_FSR	Cu2C40H40N4O8	1.93995	5.84293	3.90299	-1.85152	2.05146	94	CSD						FALSE	FALSE	FALSE
qmof-ca7241d	EKUFAR_FSR	Cu2C40H40N4O8	1.82481	5.80266	3.97784	-1.78961	2.18823	94	CSD						FALSE	FALSE	FALSE
qmof-d655f8d	EKUFUN_FSR	Co2C44H48N8O14S2	1.81722	6.06871	4.25149	-0.290645	3.96084	118	CSD						FALSE	FALSE	FALSE
qmof-a7a93aa	ELINAP_FSR	Cu2C40H32N4O8	3.05567	6.49587	3.4402	-1.0791	2.3611	86	CSD						FALSE	FALSE	FALSE
qmof-089b013	ELINET_FSR	Ni2C32H40N8O12	1.86379	6.10469	4.2409	-0.698937	3.54197	94	CSD						FALSE	FALSE	FALSE
qmof-57b6935	ELINIX_FSR	CuC16H16N4O4	2.59131	6.33266	3.74135	-1.24217	2.49918	41	CSD						FALSE	FALSE	FALSE
qmof-f66d709	ELUGUO_FSR	Cu2C40F8H32N4O10	2.91859	6.24556	3.32697	-0.816223	2.51074	96	CSD						FALSE	FALSE	FALSE
qmof-7c0089b	EMAMOW_FSR	Ni4C72H72N8O24	3.33227	6.4522	3.11993	-2.11521	1.00472	180	CSD						FALSE	FALSE	FALSE
qmof-d689892	EMAZAT_FSR	Ag4C24H16N16O12	3.40154	5.89825	2.49672	0.537104	3.03382	72	CSD						TRUE	TRUE	TRUE
qmof-9034501	EMEJAJ_FSR	Cu2C56F12H48N8Si2	3.06071	6.93351	3.87281	-3.22965	0.643159	128	CSD						FALSE	FALSE	FALSE
qmof-ee1da8c	EMELIR_FSR	Cu8C48H64I8N16	2.69042	5.06838	2.37796	0.757713	3.13568	144	CSD						FALSE	FALSE	FALSE
qmof-8ed0ec6	EMELOX_FSR	Cu8C48H64I8N16	2.75132	4.95595	2.20464	0.982061	3.1867	144	CSD						FALSE	FALSE	FALSE
qmof-ef5cc84	EMEMAK01_FSR	Cu8C24H32I8N8	3.38986	5.46372	2.07387	1.61092	3.68479	80	CSD						FALSE	FALSE	FALSE
qmof-06bc0e5	EMOHIZ_FSR	Co4C80H84N16O20	1.89568	5.67433	3.77865	-1.74873	2.02992	204	CSD						FALSE	FALSE	FALSE
qmof-90c218f	EMOPIH_FSR	Ni2C28H40O10	2.04397	6.6308	4.58683	-1.31918	3.26765	80	CSD						FALSE	FALSE	FALSE
qmof-671d1a2	EMOTAC_FSR	Ni2C20H24N4O10	1.75544	5.6691	3.91366	-1.08074	2.83292	60	CSD						FALSE	FALSE	FALSE
qmof-7bfb29d	ENANIS_FSR	Cu4C80H48N24O32	3.37122	7.21808	3.84686	-1.63769	2.20917	188	CSD						FALSE	FALSE	FALSE
qmof-05305ab	ENAQER_FSR	Cd4C72H60N20O24	3.50745	5.76468	2.25723	-1.44334	0.813885	180	CSD						TRUE	TRUE	FALSE
qmof-a2987bf	ENOSOQ_FSR	Ni4C32H72I8O16	3.15859	6.1032	2.94461	0.00863	2.95324	132	CSD						FALSE	FALSE	FALSE
qmof-ad015e6	ENUCUM_FSR	NiZn2C12H14O16	1.64537	6.55587	4.9105	-0.868445	4.04205	45	CSD						FALSE	FALSE	FALSE
qmof-09e67ae	EPEYAA_FSR	Zn2C28H30N2O8	4.66416	7.28224	2.61809	-1.23631	1.38178	70	CSD						FALSE	FALSE	FALSE
qmof-1dc8075	EPIRUS_FSR	Cu2C34H28N6S2	3.44015	5.65092	2.21077	0.220918	2.43169	72	CSD						FALSE	FALSE	FALSE
qmof-7541f7a	EPIXIL_FSR	NiC20H18N4O6	2.29144	6.67908	4.38764	-0.575868	3.81177	49	CSD						FALSE	FALSE	FALSE
qmof-e993e6b	EPIXUX_FSR	Cu2C40H28N8O8	3.15159	6.75449	3.6029	-1.22447	2.37843	86	CSD						FALSE	FALSE	FALSE
qmof-d17a645	EQETAX_FSR	Cu8C136H88N24O40	3.15968	7.11197	3.95229	-3.39809	0.554193	296	CSD						FALSE	FALSE	FALSE
qmof-5f22410	EQIRIG_FSR	Ni2C44H44N8O16	2.8585	6.14139	3.2829	-1.89847	1.38443	114	CSD						FALSE	FALSE	FALSE
qmof-905f6f5	EQIZAF_FSR	Cu4Br4C8H8N4	2.73418	5.17126	2.43708	1.10978	3.54686	28	CSD						FALSE	FALSE	FALSE
qmof-e72c3e9	EQOBUH_FSR	Co4C24H24N16	1.45043	6.13542	4.68499	-2.22389	2.46111	68	CSD						FALSE	FALSE	FALSE
qmof-fd9d828	EQOCIW_FSR	Co4C24H24N16	2.34364	6.20391	3.86027	-2.4525	1.40777	68	CSD						FALSE	FALSE	FALSE
qmof-875b2e9	ERAREU_FSR	AgC14H6N7O3	3.95525	6.77166	2.81641	-0.823752	1.99266	31	CSD						FALSE	FALSE	FALSE
qmof-1302ca9	ERUDAY_FSR	CuC26H30N4O8	3.32746	7.26366	3.9362	-1.13329	2.80291	69	CSD						FALSE	FALSE	FALSE
qmof-74ea819	ESATEY_FSR	Zn4C68H48N8O20	4.37249	6.67861	2.30612	-1.14152	1.1646	148	CSD						FALSE	FALSE	FALSE
qmof-742cbde	ESEHOB_FSR	Cu2C40H26N12O8	3.03598	6.56715	3.53117	-0.369281	3.16189	88	CSD						FALSE	FALSE	FALSE
qmof-fc8a9d4	ESIPUR02_FSR	Cu4C102F36H52O24	3.255	7.03584	3.78084	-2.19022	1.59062	218	CSD						FALSE	FALSE	FALSE
qmof-29e411b	ESOJAX_FSR	Cu4C56Cl16H32N16O16	3.07409	6.43342	3.35933	-0.559511	2.79982	140	CSD						FALSE	FALSE	FALSE
qmof-8ffd817	ESUCUR01_FSR	Fe2C62H42N22O4S4	2.55661	5.50827	2.95167	-0.791252	2.16041	136	CSD						FALSE	FALSE	FALSE
qmof-41a421b	ETAWOM_FSR	CoC40H28N10O6	2.81514	5.67326	2.85812	-0.930851	1.92727	85	CSD						FALSE	FALSE	FALSE
qmof-e2ef78a	ETEVEG_FSR	Cu4C48H36N16O8S4	2.95621	5.20804	2.25183	0.562231	2.81406	116	CSD						FALSE	FALSE	FALSE
qmof-10aa8d9	ETUKEK_FSR	Ag4C32H20N8O24	3.27734	5.7723	2.49497	-0.096052	2.39892	88	CSD						TRUE	TRUE	TRUE
qmof-002a6da	ETUSIW_FSR	Cu2C28H24N8O8	2.69939	6.49322	3.79383	-0.708774	3.08505	70	CSD						FALSE	FALSE	FALSE
qmof-1985e04	EVONOS_FSR	Fe2C20H12N8O16	2.7322	5.70654	2.97434	-1.55296	1.42137	58	CSD						FALSE	FALSE	FALSE
qmof-21e5b1b	EWAXOP_FSR	Cu2C28H40N8O14S2	2.63227	6.55434	3.92208	-1.03846	2.88362	94	CSD						FALSE	FALSE	FALSE
qmof-cdf0dd2	EWEBUD_FSR	Cu2Mo4C28H20N4O17	3.90779	7.32003	3.41225	-0.348706	3.06354	75	CSD						FALSE	FALSE	FALSE
qmof-bc46dbc	EXAVOP_FSR	Cu2C56H36N8O24	3.51276	6.16285	2.65009	-0.782655	1.86743	126	CSD						FALSE	FALSE	FALSE
qmof-cc1705b	EXIDIZ_FSR	Cu4C86H64N8O32	3.24585	7.24571	3.99986	-1.97935	2.02051	194	CSD						FALSE	FALSE	FALSE
qmof-8fd5f30	EXOHUU_FSR	Cu2C24Cl4H32N4O20	2.97027	7.03709	4.06682	-1.59761	2.4692	86	CSD						FALSE	FALSE	FALSE
qmof-bd2004d	EXOMAF_FSR	Cu2Mo8C36H48N4O26	3.94971	7.13288	3.18317	-1.09146	2.09171	124	CSD						FALSE	FALSE	FALSE
qmof-afcc0ad	EXUHUC_FSR	Mn9C66H66N12O48	1.87264	4.87366	3.00102	-0.815848	2.18518	201	CSD						FALSE	FALSE	FALSE
qmof-ba95831	EXUMOZ_FSR	Mn2C24H12N4O8	2.94186	5.14753	2.20567	0.012116	2.21778	50	CSD						FALSE	FALSE	FALSE
qmof-8533641	EZAWOT_FSR	Cu2C26H40N4O10	2.82747	6.74368	3.91621	-1.81625	2.09996	82	CSD						FALSE	FALSE	FALSE
qmof-f09c00f	FABYUE_FSR	Co4C36H32N8O8	1.63508	5.82301	4.18794	-0.507123	3.68081	88	CSD						FALSE	FALSE	FALSE
qmof-dbcf346	FADZEP01_FSR	Cu2C8H16N4O12	2.90753	7.12445	4.21692	-2.16536	2.05157	42	CSD						FALSE	FALSE	FALSE
qmof-f391693	FAFMEG_FSR	Cu4V4C24F12H32N24O4	2.30814	5.39786	3.08972	1.0006	4.09032	104	CSD						FALSE	FALSE	FALSE
qmof-ef7a4cd	FAKQEN02_FSR	Cu2C20H28N4O14S2	3.70036	7.73055	4.03019	-1.75673	2.27345	70	CSD						FALSE	FALSE	FALSE
qmof-e97bef9	FALQIU_FSR	Cu3Pr2C36H54N6O24	1.9279	5.98371	4.05582	-1.29996	2.75585	125	CSD						FALSE	FALSE	FALSE
qmof-4454b13	FALXUN_FSR	Pb4C56H64N24O28	3.66887	6.40282	2.73396	-1.84423	0.889731	176	CSD						FALSE	FALSE	FALSE
qmof-ed950f0	FAMHEI_FSR	Co2C10H18N2O12S2	2.09211	6.83569	4.74358	-0.428273	4.3153	46	CSD						FALSE	FALSE	FALSE
qmof-ea9f5eb	FAPTIB_FSR	Cd4C72H52N12O16	3.34827	5.28403	1.93576	-2.23327	-0.297518	156	CSD						FALSE	FALSE	FALSE
qmof-408d287	FARJOZ_FSR	NiC44H46N4O10	2.14772	5.59908	3.45137	-0.603508	2.84786	105	CSD						FALSE	FALSE	FALSE
qmof-3c23f8c	FARZUU_FSR	Ni2C38H26N8O8S4	3.76419	6.25093	2.48674	-0.021237	2.46551	86	CSD						TRUE	FALSE	FALSE
qmof-26483dd	FASCUZ01_FSR	Mn3C36H30N12S6	2.16818	5.45505	3.28687	0.04796	3.33483	87	CSD						FALSE	FALSE	FALSE
qmof-e44a050	FATJOA_FSR	CdCu2C56Cl2H72N4O12	1.91504	5.69397	3.77893	-2.02119	1.75774	149	CSD						FALSE	FALSE	FALSE
qmof-c32a137	FEFTER_FSR	CuMo4C42H30N6O13	3.68314	6.35543	2.67229	-0.166064	2.50622	96	CSD						FALSE	FALSE	FALSE
qmof-19caac2	FEMTIB_FSR	Cu4Pt4C56H44N28	3.13253	6.75522	3.62269	-1.20184	2.42085	136	CSD						FALSE	FALSE	FALSE
qmof-b981b73	FENBIM_FSR	Co4C40H40N16O16	1.62051	6.11126	4.49076	-0.894745	3.59601	116	CSD						FALSE	FALSE	FALSE
qmof-d851c65	FENSUN_FSR	Mn2C10H8N4O10	2.82027	5.78045	2.96018	0.581743	3.54192	34	CSD						FALSE	FALSE	FALSE
qmof-35b83fb	FENSUN01_FSR	Mn8C40H32N16O40	3.38041	6.08366	2.70325	0.701401	3.40466	136	CSD						FALSE	FALSE	FALSE
qmof-34904e2	FERVOP_FSR	Ag6Fe3C48H24N24	4.17161	6.31092	2.13931	-1.57004	0.569276	105	CSD						FALSE	FALSE	FALSE
qmof-59a2ee1	FESBAJ_FSR	Mn4C80H56N8O36	2.9427	5.76886	2.82616	-0.066772	2.75938	184	CSD						FALSE	FALSE	FALSE
qmof-194d013	FETLUM_FSR	Cu4C20H12I4N12S4	2.88348	5.30141	2.41793	1.1974	3.61534	56	CSD						FALSE	FALSE	FALSE
qmof-221d349	FEVRED_FSR	Zn2C36H24N22O12	3.96021	6.76577	2.80556	-1.62846	1.17711	96	CSD						FALSE	FALSE	FALSE
qmof-9e477b5	FEWRAB_FSR	Mn3C30H24N42	1.96449	4.57432	2.60983	0.683873	3.2937	99	CSD						FALSE	FALSE	FALSE
qmof-22084e3	FEXVUA_FSR	Cu4Mo8C48H32N12O26	3.74649	5.75251	2.00602	0.772948	2.77896	130	CSD						TRUE	FALSE	FALSE
qmof-c5457b7	FEZMUT_FSR	K2C26H50N4O16	2.04176	5.09016	3.04839	-0.950884	2.09751	98	CSD						FALSE	FALSE	FALSE
qmof-d108947	FIBMUA_FSR	CuC12Cl2H22N6O8	3.0356	6.92047	3.88488	-0.692522	3.19235	51	CSD						FALSE	FALSE	FALSE
qmof-5c15ba0	FIDXIC_FSR	Ag2UC24Cl4H12N4O10	2.84684	5.53256	2.68572	-0.148678	2.53704	57	CSD						FALSE	FALSE	FALSE
qmof-9c2bfdc	FIFZEA_FSR	Cu4C40H32I4N8S4	2.17768	4.72637	2.54869	0.74257	3.29126	92	CSD						FALSE	FALSE	FALSE
qmof-e7ec47b	FIHBIJ_FSR	Cu2C28H18N2O10	2.95631	6.81506	3.85875	-0.71223	3.14652	60	CSD						FALSE	FALSE	FALSE
qmof-b30a68e	FIHWOK_FSR	Ni2C28H16N12S8	2.65692	5.33909	2.68217	0.576433	3.2586	66	CSD						FALSE	FALSE	FALSE
qmof-d867a6e	FIKDAG_FSR	Cu2C56H40N4O16	3.00842	6.40495	3.39654	-1.82634	1.57019	118	CSD						FALSE	FALSE	FALSE
qmof-e58cc9d	FIKKOC01_FSR	Cu2C14H16I2N4O4	2.40218	4.83331	2.43113	1.0987	3.52983	42	CSD						FALSE	FALSE	FALSE
qmof-a498ebd	FIMKEU_FSR	Zn2C24Cl4H16N12	4.42182	7.20035	2.77853	-2.24602	0.532513	58	CSD						FALSE	FALSE	FALSE
qmof-50b9f96	FINTOO_FSR	CuGd2C14H18N2O22S2	3.11957	7.3714	4.25184	-1.15804	3.0938	61	CSD						FALSE	FALSE	FALSE
qmof-ec286a6	FIQFUH_FSR	Cu4C20H20N12O24	3.89244	7.6668	3.77435	-1.57946	2.1949	80	CSD						FALSE	FALSE	FALSE
qmof-dc165ea	FIRHIZ_FSR	Ni4C80H56N16O20	2.15128	6.03722	3.88593	-0.681794	3.20414	176	CSD						FALSE	FALSE	FALSE
qmof-e125d99	FIVPIK_FSR	Ag4C16H12N12O12	3.48739	6.23434	2.74695	0.25573	3.00268	56	CSD						FALSE	FALSE	FALSE
qmof-b110f68	FIXCAS_FSR	CuC24H30N4O8	2.81342	6.84241	4.02899	-2.07197	1.95702	67	CSD						FALSE	FALSE	FALSE
qmof-e16328e	FIZKUV_FSR	Fe2C20H22N4O14P4	4.2617	7.21952	2.95781	-0.632359	2.32545	66	CSD						FALSE	FALSE	FALSE
qmof-6a840fe	FIZYAQ_FSR	Ni2C40H32N16O8S6	2.46305	6.09216	3.62911	-1.28336	2.34575	104	CSD						FALSE	FALSE	FALSE
qmof-e45b793	FOCKEP_FSR	Ni2C32H36N8S4	2.9055	6.11576	3.21026	-0.288716	2.92154	82	CSD						FALSE	FALSE	FALSE
qmof-b1156fe	FOCMAM_FSR	Cu4Mo4As4C48F4H48N8O24	3.09325	7.01013	3.91688	-0.766923	3.14996	144	CSD						FALSE	FALSE	FALSE
qmof-3de2d70	FODLEQ03_FSR	Cu3C39H24N9	2.49152	4.99389	2.50238	0.119155	2.62153	75	CSD						FALSE	FALSE	FALSE
qmof-c71dee9	FOFWII_FSR	Fe4K2C24H48N8O20S2	2.93805	4.93415	1.99609	-0.26639	1.7297	108	CSD						FALSE	FALSE	FALSE
qmof-0cbcc26	FOHSAW01_FSR	Ni4Sr4C24H56O52	1.59938	6.66155	5.06216	-2.04972	3.01245	140	CSD						FALSE	FALSE	FALSE
qmof-f8c1b29	FOTPOV_FSR	Cu2Mo4C14H12N8O14	3.78058	6.86115	3.08057	0.521687	3.60226	54	CSD						FALSE	FALSE	FALSE
qmof-ff169e1	FOXQUF_FSR	Co2C36H44N12O12S2	1.79067	6.03043	4.23976	-0.969916	3.26984	108	CSD						FALSE	FALSE	FALSE
qmof-9fb6152	FUHLIF_FSR	Co4C84H96N16O16	2.20243	6.48048	4.27805	-1.9043	2.37375	216	CSD						FALSE	FALSE	FALSE
qmof-1e0a9c9	FUHMIG_FSR	CuC28H26N6O6	2.499	6.28642	3.78742	-1.1947	2.59272	67	CSD						FALSE	FALSE	FALSE
qmof-715f306	FUHNUT_FSR	Ag4C24H14N6O12	3.6348	6.0436	2.4088	0.223994	2.6328	60	CSD						TRUE	TRUE	FALSE
qmof-ceef48c	FUHPAB_FSR	Ag4C18H10N4O8	2.92738	5.74733	2.81995	0.654448	3.47439	44	CSD						FALSE	FALSE	FALSE
qmof-dd74e9c	FUMQAF_FSR	Ni4C16H48O32	1.64593	6.50386	4.85793	-0.978328	3.8796	100	CSD						FALSE	FALSE	FALSE
qmof-efaa9ca	FUQKEI_FSR	Cu2C24H20N20O2	3.05321	7.25091	4.1977	-1.86333	2.33437	68	CSD						FALSE	FALSE	FALSE
qmof-1b07b31	FUSPIS10_FSR	Ca4C40H64O28	3.97633	6.03542	2.05909	-0.441093	1.618	136	CSD						FALSE	FALSE	FALSE
qmof-8a4c3d2	FUXLUF_FSR	Cu2C20H32N4O12	2.40081	6.45439	4.05358	-1.07667	2.97691	70	CSD						FALSE	FALSE	FALSE
qmof-3415203	FUYTID01_FSR	Cu4C48H48N24O20S4	2.92696	6.67544	3.74848	-0.134609	3.61387	148	CSD						FALSE	FALSE	FALSE
qmof-ae58b33	FUYYAA_FSR	Cu2Nd2C30H22N4O24	3.77468	7.55277	3.77809	-1.6524	2.12569	84	CSD						FALSE	FALSE	FALSE
qmof-a5b6ce8	FUZXAA_FSR	CuC20H28N10O8	2.40619	6.46289	4.0567	-1.04448	3.01222	67	CSD						FALSE	FALSE	FALSE
qmof-1507a40	GABHOH_FSR	Cu4C16H12I8N8	3.25572	5.34142	2.0857	1.8932	3.97891	48	CSD						FALSE	FALSE	FALSE
qmof-9be438c	GABHUN_FSR	Cu4C16H12I8N8	3.44041	5.34075	1.90033	1.96196	3.86229	48	CSD						FALSE	FALSE	FALSE
qmof-36fc2b5	GABSAG_FSR	Zn2C28H30N4O8	3.32749	6.13821	2.81071	-2.03409	0.776626	72	CSD						FALSE	FALSE	FALSE
qmof-5a5686e	GAHZAS_FSR	CuC24H32N8O4S2	2.75314	6.34737	3.59422	-0.926923	2.6673	71	CSD						FALSE	FALSE	FALSE
qmof-255b822	GAHZUM_FSR	CuC42H50N8O4S2	2.47923	5.43084	2.9516	-0.457012	2.49459	107	CSD						FALSE	FALSE	FALSE
qmof-34515cf	GAHZUN_FSR	Cu6C26H20I6N8	2.53405	4.92342	2.38937	1.45104	3.84041	66	CSD						FALSE	FALSE	FALSE
qmof-6250e57	GAJBEA_FSR	CuC44H50N8O4S2	2.53223	5.69026	3.15802	-0.57817	2.57985	109	CSD						FALSE	FALSE	FALSE
qmof-1ad729f	GAJBOK_FSR	CuC30H28N8O6S2	3.95753	6.74959	2.79206	-0.856467	1.93559	75	CSD						FALSE	FALSE	FALSE
qmof-e9fbf5f	GAKNAI_FSR	Cu2C38H28N4O12S2	3.21968	6.83195	3.61226	-0.678238	2.93403	86	CSD						FALSE	FALSE	FALSE
qmof-0ca8b3d	GAKYAU_FSR	Cu4C30H32I4N6S2	2.69341	5.01996	2.32654	0.678255	3.0048	78	CSD						FALSE	FALSE	FALSE
qmof-0fd78a4	GAMMUF_FSR	Cu2C40Cl4H56N16	1.99029	5.91081	3.92051	-0.509099	3.41141	118	CSD						FALSE	FALSE	FALSE
qmof-dc0cbac	GANKOX_FSR	Ni2C32H24N4O10	2.96958	6.37464	3.40505	-0.917722	2.48733	72	CSD						FALSE	FALSE	FALSE
qmof-6683238	GANKUD_FSR	CoC22H20N4O6	2.20529	5.78993	3.58463	-0.188226	3.39641	53	CSD						FALSE	FALSE	FALSE
qmof-650269a	GAPBAC_FSR	Cu2C44F12H32N8O4Si2	3.47489	7.25068	3.77579	-1.43246	2.34333	104	CSD						FALSE	FALSE	FALSE
qmof-43f07bb	GASTUP_FSR	K4C24Cl4H16N4O10	3.74836	5.9177	2.16934	-0.249867	1.91947	62	CSD						TRUE	FALSE	FALSE
qmof-3a1e0f0	GAXRAA_FSR	Ni2C34H24N10O10	2.95286	5.85386	2.90101	-0.996633	1.90437	80	CSD						FALSE	FALSE	FALSE
qmof-0b83e38	GEBQUB01_FSR	Li8C32H56O40	3.59486	5.83007	2.23521	-0.796083	1.43913	136	CSD						TRUE	TRUE	FALSE
qmof-129e045	GEHQUG_FSR	Cu2Mo4C32H20N4O17	4.31348	7.52946	3.21599	-0.28017	2.93582	79	CSD						FALSE	FALSE	FALSE
qmof-4cc3c71	GEMXUU01_FSR	Ni4C12Cl8H28N4O8	2.20593	5.80736	3.60144	0.253451	3.85489	64	CSD						FALSE	FALSE	FALSE
qmof-bf9ccaf	GENLAP_FSR	Cu6Br6C102H66N12O18	3.11918	5.7818	2.66262	-1.66113	1.00149	210	CSD						FALSE	FALSE	FALSE
qmof-b56b577	GEQBAH_FSR	Gd2C18Cl6H12O18	3.92564	5.78214	1.8565	-1.29294	0.56356	56	CSD						FALSE	FALSE	FALSE
qmof-050c6ef	GESDEP_FSR	MnC32H28O10	2.15818	4.17131	2.01312	0.797626	2.81075	71	CSD						FALSE	FALSE	FALSE
qmof-a1d1c28	GEVNIF01_FSR	Cu4C48H40N24O4	2.83725	6.37153	3.53427	-0.706015	2.82826	120	CSD						FALSE	FALSE	FALSE
qmof-d9c2d65	GEXFUM_FSR	Ag2C30H24N6O8	3.31097	6.03907	2.72809	-0.776267	1.95183	70	CSD						FALSE	FALSE	FALSE
qmof-785f2a9	GEZCOF_FSR	Cu4C68Cl4H60N16O16	3.07881	6.92531	3.8465	-1.29876	2.54774	168	CSD						FALSE	FALSE	FALSE
qmof-6db0296	GIBRIV_FSR	Ni2C58H60N8O10	1.84982	6.25916	4.40935	-0.959183	3.45016	138	CSD						FALSE	FALSE	FALSE
qmof-a0b1b43	GICBOM_FSR	Cu2Br4C36H22N6O12	3.41844	6.66165	3.24321	-1.43457	1.80863	82	CSD						FALSE	FALSE	FALSE
qmof-a4a4669	GICDON_FSR	Mn2C32H44I8N4O16	2.601	5.38066	2.77966	0.535847	3.31551	106	CSD						FALSE	FALSE	FALSE
qmof-e0eb4a6	GICDOO_FSR	Ni2C32H28N8O12	2.48284	6.84696	4.36412	-0.877121	3.487	82	CSD						FALSE	FALSE	FALSE
qmof-2f9cf3e	GICZOI_FSR	K2C24H16N10O8	3.66365	5.50041	1.83676	-0.238793	1.59797	60	CSD						FALSE	FALSE	FALSE
qmof-a6a8f49	GIFLAL_FSR	Cd4C44H40N24O14S2	2.92351	5.05757	2.13406	0.17006	2.30412	128	CSD						FALSE	FALSE	FALSE
qmof-1ca4ac2	GIJDEI_FSR	Co2Cu4Br4C30H60N6S12	2.10798	5.00051	2.89253	-0.515857	2.37667	118	CSD						FALSE	FALSE	FALSE
qmof-b882056	GIKBEK_FSR	Ba2C60H42O14	2.94715	4.95471	2.00756	0.184566	2.19212	118	CSD						FALSE	FALSE	FALSE
qmof-d6b4784	GIMDEM_FSR	Cu2C46H46N10O8	2.73688	5.78466	3.04778	-1.34167	1.70611	112	CSD						FALSE	FALSE	FALSE
qmof-df87a37	GIMHOA_FSR	Ag2NiC14H6N2O10	2.9849	6.16055	3.17565	0.103709	3.27936	35	CSD						FALSE	FALSE	FALSE
qmof-b155426	GIQQOP_FSR	Ni3C48H60N18S6	1.9209	5.37444	3.45354	-0.013389	3.44015	135	CSD						FALSE	FALSE	FALSE
qmof-694ec8a	GIQREG_FSR	Ni2C24H16N8S4	3.27995	5.63721	2.35726	0.164633	2.5219	54	CSD						FALSE	FALSE	FALSE
qmof-7955c68	GIRYIR_FSR	Zn6C80H56N12O28	4.07359	6.75088	2.67728	-1.5734	1.10389	182	CSD						FALSE	FALSE	FALSE
qmof-d44c3fa	GISHIC_FSR	Cu2C34H40N4O10	2.29928	6.31617	4.01689	-1.5213	2.49559	90	CSD						FALSE	FALSE	FALSE
qmof-8c0809c	GITTIN_FSR	Co6C36H24N36O24	4.17566	7.60348	3.42782	-3.74772	-0.319891	126	CSD						FALSE	FALSE	FALSE
qmof-d4d3c5f	GIWVEO_FSR	Cs2K2C22H4N8O8	4.14392	5.73409	1.59017	-0.18903	1.40114	46	CSD						FALSE	FALSE	FALSE
qmof-fdeb493	GIXNAE_FSR	Ni4C56H48N8O20	2.78511	6.06471	3.27959	-3.30156	-0.021964	136	CSD						FALSE	FALSE	FALSE
qmof-561b7f4	GLALCU10_FSR	Cu4C20H32N8O12	2.57016	6.26725	3.69709	-0.631495	3.06559	76	CSD						FALSE	FALSE	FALSE
qmof-d544575	gmof_Al2O6-ADC_B-fum_B_No249	Al2C8H10N4O10	2.75173	4.94632	2.19458	-0.160202	2.03438	34	GMOF						FALSE	FALSE	FALSE
qmof-cdc5769	gmof_Al2O6-AZO_B-BDC_B_No266	Al2C22H16N4O12	3.6039	5.86744	2.26354	-2.92711	-0.663571	56	GMOF						TRUE	TRUE	FALSE
qmof-4b4837b	gmof_Al2O6-AZO_B-DPAC_B_No95	Al2C30Cl2H18N4O10	3.80768	5.82577	2.01809	-3.60515	-1.58707	66	GMOF						FALSE	FALSE	FALSE
qmof-eecf04e	gmof_Al2O6-AZO_B-fum_B_No111	Al2C18H16N6O10	3.51159	5.30309	1.7915	-1.90631	-0.114814	52	GMOF						FALSE	FALSE	FALSE
qmof-73d1377	gmof_Al2O6-BDC_B-DPAC_B_No272	Al2C24Cl2H12O12	3.14918	5.32921	2.18003	-2.58064	-0.400604	52	GMOF						FALSE	FALSE	FALSE
qmof-0b9c9b5	gmof_Al2O6-BDC_B-fum_B_No88	Al2C12FH9N2O10	2.92918	4.8232	1.89402	-0.880749	1.01327	36	GMOF						FALSE	FALSE	FALSE
qmof-2522b56	gmof_Al2O6-BDC_B-irmof10_B_No186	Al2C24H20N2O10	2.74699	4.80592	2.05892	-1.52736	0.531564	58	GMOF						FALSE	FALSE	FALSE
qmof-5689ec9	gmof_Al2O6-BDC_B-irmof20_B_No253	Al2C16H9N3O12S2	3.53225	5.77754	2.24529	-1.42558	0.819714	44	GMOF						TRUE	TRUE	FALSE
qmof-65cfa24	gmof_Al2O6-BDC_B-irmof7_B_No40	Al2C20H12O16	4.12957	6.14003	2.01046	-1.11201	0.898449	50	GMOF						FALSE	FALSE	FALSE
qmof-6dc78ec	gmof_Al2O6-BDC_B-irmof7_B_No425	Al2C20FH15N4O10	3.07398	5.15819	2.08421	-0.789974	1.29423	52	GMOF						FALSE	FALSE	FALSE
qmof-26dc3b8	gmof_Al2O6-BDC_B-irmof7_B_No562	Al2C20Cl2H12N2O10	3.33085	5.11196	1.78111	-0.744387	1.03673	48	GMOF						FALSE	FALSE	FALSE
qmof-14a36ed	gmof_Al2O6-BDC_B-irmof7_B_No693	Al2C20H10N2O16	4.24379	6.33028	2.08649	-1.58775	0.498734	50	GMOF						FALSE	FALSE	FALSE
qmof-3a9ad54	gmof_Al2O6-DPAC_B-fum_B_No232	Al2C20H14N2O12	3.32743	5.47669	2.14926	-2.20655	-0.057294	50	GMOF						FALSE	FALSE	FALSE
qmof-13f8e19	gmof_Al2O6-DPAC_B-irmof7_B_No1270	Al2C28H16O18	3.90005	5.76605	1.866	-2.24089	-0.374886	64	GMOF						FALSE	FALSE	FALSE
qmof-cf68a4b	gmof_Al2O6-DPAC_B-irmof7_B_No970	Al2C28H16N4O14	3.74858	5.79806	2.04947	-2.45135	-0.401877	64	GMOF						TRUE	FALSE	FALSE
qmof-e8ce4cf	gmof_Al2O6-fum_B-irmof7_B_No214	Al2C16F6H6N2O10	3.07194	5.01138	1.93944	-0.139993	1.79945	42	GMOF						FALSE	FALSE	FALSE
qmof-75d2f5f	gmof_Al2O6-irmof10_B-irmof20_B_No233	Al2C24H14N2O14S2	3.43378	5.75271	2.31893	-2.70806	-0.389136	58	GMOF						TRUE	TRUE	FALSE
qmof-9ef6fed	gmof_Al2O6-irmof10_B-irmof7_B_No597	Al2C26H16N4O14	3.55784	5.79467	2.23684	-2.10827	0.128569	62	GMOF						TRUE	TRUE	FALSE
qmof-4410553	gmof_Al2O6-irmof20_B-irmof7_B_No301	Al2C20F2H12N4O10S2	3.15316	4.99832	1.84516	-0.928423	0.916739	52	GMOF						FALSE	FALSE	FALSE
qmof-9489acc	gmof_Al2O6-irmof20_B-irmof7_B_No37	Al2C20H10O14S2	3.78662	5.80254	2.01592	-1.4675	0.548419	48	GMOF						TRUE	FALSE	FALSE
qmof-7df7140	gmof_Al2O6-irmof20_B-irmof7_B_No534	Al2C20H10O17S2	4.07105	5.8328	1.76175	-1.1344	0.627359	51	GMOF						FALSE	FALSE	FALSE
qmof-a77a87b	gmof_AlO6-ADC_A_No22	Al2C48H54N24O12	2.2415	4.15102	1.90952	-1.71803	0.191498	140	GMOF						FALSE	FALSE	FALSE
qmof-32894ad	gmof_AlO6-AZO_A_No14	Al2C42F24N6O12	5.18057	7.99031	2.80974	-5.19746	-2.38772	86	GMOF						FALSE	FALSE	FALSE
qmof-b0b952a	gmof_AlO6-AZO_A_No16	Al2C42H36N18O12	3.11255	4.96815	1.8556	-2.76975	-0.914151	110	GMOF						FALSE	FALSE	FALSE
qmof-a84f36c	gmof_AlO6-AZO_A_No20	Al2C42N30O60	6.85087	9.58989	2.73901	-5.27525	-2.53624	134	GMOF						FALSE	FALSE	FALSE
qmof-6afa476	gmof_AlO6-AZO_A_No22	Al2C42H24N6O24	4.42806	6.31733	1.88927	-3.81606	-1.92679	98	GMOF						FALSE	FALSE	FALSE
qmof-b8bda61	gmof_AlO6-DPAC_A_No31	Al2C48H48N24O12	2.51734	4.16953	1.6522	-1.7302	-0.078003	134	GMOF						FALSE	FALSE	FALSE
qmof-efedb54	gmof_AlO6-mof177-N_No33	Al3C63H27N12O36	4.634	6.55508	1.92108	-1.15669	0.764391	141	GMOF						FALSE	FALSE	FALSE
qmof-1594a7d	gmof_AlO6-mofHTB_No15	AlC27H15N10O6	3.78357	5.75789	1.97433	-2.56338	-0.589054	59	GMOF						TRUE	FALSE	FALSE
qmof-6ebfed4	gmof_AlO6-mofHTB_No16	AlC27H18N13O6	3.74099	5.40027	1.65928	-1.96284	-0.303557	65	GMOF						FALSE	FALSE	FALSE
qmof-bd7e56c	gmof_AlO6-pcn6_B_No13	AlC24H24N15O6	2.30753	4.44739	2.13987	-0.010164	2.1297	70	GMOF						FALSE	FALSE	FALSE
qmof-bd5b750	gmof_CuN4-SiF6-ADC_No1	CuC24F6H20N4Si	3.25608	6.59083	3.33475	-4.54618	-1.21143	56	GMOF						FALSE	FALSE	FALSE
qmof-08ad999	gmof_CuN4-SiF6-ADC_No13	CuC24F6H20N4O4Si	3.18982	6.11181	2.92198	-3.84795	-0.925967	60	GMOF						FALSE	FALSE	FALSE
qmof-c8860bc	gmof_CuN4-SiF6-ADC_No2	CuBr4C24F6H16N4Si	3.71226	6.8745	3.16224	-4.34419	-1.18195	56	GMOF						FALSE	FALSE	FALSE
qmof-1cc6d2b	gmof_CuN4-SiF6-ADC_No3	CuC28F6H28N4Si	3.03414	6.43721	3.40307	-4.20924	-0.806168	68	GMOF						FALSE	FALSE	FALSE
qmof-baa76cb	gmof_CuN4-SiF6-ADC_No4	CuC24Cl4F6H16N4Si	3.63362	6.87435	3.24073	-4.36446	-1.12373	56	GMOF						FALSE	FALSE	FALSE
qmof-362bef5	gmof_CuN4-SiF6-ADC_No6	CuC24F10H16N4Si	3.48789	6.79407	3.30619	-4.5903	-1.28411	56	GMOF						FALSE	FALSE	FALSE
qmof-b731939	gmof_CuN4-SiF6-AZO_No2	CuC20F10H12N8Si	4.17776	7.44826	3.2705	-5.23946	-1.96897	52	GMOF						FALSE	FALSE	FALSE
qmof-be54856	gmof_CuN4-SiF6-DPAC_No1	CuC24F6H16N4Si	3.3545	6.85393	3.49943	-4.88592	-1.38649	52	GMOF						FALSE	FALSE	FALSE
qmof-0d2f6a6	gmof_CuN4-SiF6-DPAC_No10	CuC24F14H8N4Si	3.9588	7.57499	3.61618	-5.21849	-1.60231	52	GMOF						FALSE	FALSE	FALSE
qmof-7e9c77b	gmof_CuN4-SiF6-DPAC_No13	CuC24F6H24N12Si	2.43495	5.5265	3.09155	-3.17653	-0.084982	68	GMOF						FALSE	FALSE	FALSE
qmof-34bb4c6	gmof_CuN4-SiF6-DPAC_No14	CuC24F6H12N8O8Si	4.35508	7.84211	3.48703	-5.08915	-1.60212	60	GMOF						FALSE	FALSE	FALSE
qmof-7370962	gmof_CuN4-SiF6-DPAC_No15	CuC24F6H8N12O16Si	5.19765	8.47131	3.27366	-5.18149	-1.90783	68	GMOF						FALSE	FALSE	FALSE
qmof-2308de6	gmof_CuN4-SiF6-DPAC_No17	CuC24F6H16N4O4Si	3.31022	6.63578	3.32556	-4.46948	-1.14392	56	GMOF						FALSE	FALSE	FALSE
qmof-22c6575	gmof_CuN4-SiF6-DPAC_No19	CuC24F6H16N4O8Si	3.26395	6.51428	3.25033	-4.24234	-0.992008	60	GMOF						FALSE	FALSE	FALSE
qmof-1b3e3c5	gmof_CuN4-SiF6-DPAC_No2	CuBr4C24F6H12N4Si	3.75561	7.21257	3.45696	-4.64347	-1.18651	52	GMOF						FALSE	FALSE	FALSE
qmof-71d1286	gmof_CuN4-SiF6-DPAC_No21	CuC24F6H16N4O12S4Si	4.33183	7.79201	3.46017	-4.44878	-0.988603	68	GMOF						FALSE	FALSE	FALSE
qmof-94df011	gmof_CuN4-SiF6-DPAC_No3	CuC28F6H24N4Si	3.12499	6.662	3.53702	-4.4238	-0.886783	64	GMOF						FALSE	FALSE	FALSE
qmof-19172d5	gmof_CuN4-SiF6-DPAC_No5	CuC24Cl4F6H12N4Si	3.71545	7.24744	3.53198	-4.71907	-1.18709	52	GMOF						FALSE	FALSE	FALSE
qmof-12bffdb	gmof_CuN4-SiF6-DPAC_No7	CuC24F10H12N4Si	3.60194	7.29425	3.69231	-5.23133	-1.53902	52	GMOF						FALSE	FALSE	FALSE
qmof-05f5f6e	gmof_CuN4-SiF6-DPAC_No8	CuC24F10H12N4Si	3.66431	7.32118	3.65687	-5.13898	-1.4821	52	GMOF						FALSE	FALSE	FALSE
qmof-626963a	gmof_Uio66Zr-BDC_A-irmof6_A_No127	Zr6C60H52N2O32	3.08839	5.29886	2.21047	-1.15644	1.05402	152	GMOF						FALSE	FALSE	FALSE
qmof-ae4bb38	gmof_Uio66Zr-BDC_A-irmof6_A_No350	Zr6C50ClH39N10O32	3.4753	5.44835	1.97305	-1.05141	0.921641	138	GMOF						FALSE	FALSE	FALSE
qmof-3298011	gmof_Uio66Zr-BDC_A-irmof6_A_No371	Zr6C50H41N11O32	3.43549	5.52925	2.09376	-1.12488	0.968884	140	GMOF						FALSE	FALSE	FALSE
qmof-2eb73bf	gmof_Uio66Zr-BDC_A-irmof7_A_No122	Zr6C72H70O38	-0.26651	1.87155	2.13806	-0.435739	1.70232	186	GMOF						FALSE	FALSE	FALSE
qmof-5f8bb84	gmof_Uio66Zr-BDC_A-irmof7_A_No182	Zr6C57H32N2O42	3.85883	6.10888	2.25004	-1.53299	0.717056	139	GMOF						FALSE	FALSE	FALSE
qmof-167de54	gmof_Uio66Zr-BDC_A-irmof7_A_No283	Zr6Br2C52H38N10O32	2.1002	4.1792	2.079	-0.893723	1.18527	140	GMOF						FALSE	FALSE	FALSE
qmof-2a30c18	gmof_Uio66Zr-BDC_A-irmof7_A_No317	Zr6C52H40N10O36	3.51459	5.52385	2.00926	-0.917836	1.09142	144	GMOF						FALSE	FALSE	FALSE
qmof-d4d4dbf	gmof_Uio66Zr-BDC_A-irmof7_A_No330	Zr6C52Cl2H8N20O72	6.32016	7.97738	1.65722	-0.648797	1.00842	160	GMOF						FALSE	FALSE	FALSE
qmof-9085c0a	gmof_Uio66Zr-BDC_A-irmof7_A_No349	Zr6C52H25N5O48	3.78189	5.82443	2.04255	-1.34975	0.692792	136	GMOF						TRUE	FALSE	FALSE
qmof-eb5a6a0	gmof_Uio66Zr-BDC_A-irmof7_A_No393	Zr6C52H30O48	4.4689	6.57286	2.10396	-1.54158	0.562375	136	GMOF						FALSE	FALSE	FALSE
qmof-2b95566	gmof_Uio66Zr-BDC_A-TED_A_No19	Zr6C50H46N10O32	3.15885	5.3194	2.16056	-1.05947	1.10109	144	GMOF						FALSE	FALSE	FALSE
qmof-d441ad0	gmof_Uio66Zr-DPAC_A_No41	Zr6C96H52O80	4.49449	6.28389	1.7894	-3.56276	-1.77336	234	GMOF						FALSE	FALSE	FALSE
qmof-25b107a	gmof_Uio66Zr-irmof10_A-irmof14_A_No285	Zr6C88F10H44N2O32	3.42234	5.44315	2.02081	-2.81938	-0.79857	182	GMOF						FALSE	FALSE	FALSE
qmof-8eb67f4	gmof_Uio66Zr-irmof10_A-irmof14_A_No287	Zr6C88F10H46N4O32	3.35584	5.04018	1.68434	-2.45285	-0.768511	186	GMOF						FALSE	FALSE	FALSE
qmof-44fa197	gmof_Uio66Zr-irmof20_A-irmof8_A_No121	Zr6C52Cl5H19N4O32S10	3.22751	4.71217	1.48467	-1.14784	0.336823	128	GMOF						FALSE	FALSE	FALSE
qmof-d088bbe	gmof_Uio66Zr-irmof20_A-irmof8_A_No122	Zr6C52Cl10H12N2O32S10	3.31463	5.33947	2.02485	-1.57472	0.450123	124	GMOF						FALSE	FALSE	FALSE
qmof-951ed7a	gmof_Uio66Zr-irmof20_A-irmof8_A_No127	Zr6C52Cl10H6N4O40S10	4.32724	6.3813	2.05406	-2.42338	-0.369323	128	GMOF						FALSE	FALSE	FALSE
qmof-80fed89	gmof_Uio66Zr-irmof20_A-irmof8_A_No139	Zr6C66H28O52S10	4.20469	5.95874	1.75405	-1.68394	0.070102	162	GMOF						FALSE	FALSE	FALSE
qmof-bc01827	gmof_Uio66Zr-irmof20_A-irmof8_A_No278	Zr6C52H17N7O42S10	3.6411	5.27113	1.63003	-1.6372	-0.007173	134	GMOF						FALSE	FALSE	FALSE
qmof-167482e	gmof_Uio66Zr-irmof20_A-irmof8_A_No311	Zr6C52H24N4O37S10	3.06157	4.68182	1.62025	-1.23111	0.389131	133	GMOF						FALSE	FALSE	FALSE
qmof-d159ad9	gmof_Uio66Zr-irmof20_A-irmof8_A_No313	Zr6C52H24N4O42S10	2.92195	4.59987	1.67792	-1.0448	0.633124	138	GMOF						FALSE	FALSE	FALSE
qmof-b078db5	gmof_Uio66Zr-irmof20_A-irmof8_A_No32	Zr6C52H24N4O32S10	3.1554	4.77194	1.61654	-1.42898	0.187558	128	GMOF						FALSE	FALSE	FALSE
qmof-a7d7957	gmof_Uio66Zr-irmof20_A-irmof8_A_No352	Zr6C52H20O64S20	3.79046	5.4833	1.69283	-1.28535	0.40748	162	GMOF						FALSE	FALSE	FALSE
qmof-ee6222e	gmof_Uio66Zr-irmof20_A-irmof8_A_No353	Zr6C52H20O66S20	4.12912	5.69722	1.5681	-1.13518	0.432921	164	GMOF						FALSE	FALSE	FALSE
qmof-3abfd72	gmof_Uio66Zr-irmof6_A_No14	Zr6C60H52N12O32	3.21792	5.28715	2.06923	-0.837069	1.23217	162	GMOF						FALSE	FALSE	FALSE
qmof-7998d02	gmof_Uio66Zr-irmof6_A-irmof7_A_No18	Zr6C62H40O42	3.62871	5.85261	2.2239	-1.42132	0.802587	150	GMOF						TRUE	TRUE	FALSE
qmof-d3fae93	gmof_Uio66Zr-irmof8_A-imd_No17	Zr6C72H40O56	3.57989	5.40374	1.82384	-1.95617	-0.132325	174	GMOF						FALSE	FALSE	FALSE
qmof-8e3629b	gmof_Zn2O8-ADC_A-DPAC_A_No1876	Zn4C72H36O40	4.14179	6.12793	1.98614	-4.38113	-2.39499	152	GMOF						FALSE	FALSE	FALSE
qmof-acf445e	gmof_Zn2O8-irmof8_A-NCO_A_No14	Zn4C48H48N24O16	2.60258	4.66843	2.06585	-2.02846	0.037391	140	GMOF						FALSE	FALSE	FALSE
qmof-4d635ee	gmof_Zn2O8N2-ADC_A_No22	Zn4C88H84N28O16	2.92849	4.96678	2.03829	-3.92697	-1.88868	220	GMOF						FALSE	FALSE	FALSE
qmof-7615abf	gmof_Zn2O8N2-ADC_A-AZO_A_No140	Zn2Br4C42H20N8O16	4.30746	6.10385	1.79639	-4.78477	-2.98838	92	GMOF						FALSE	FALSE	FALSE
qmof-2473511	gmof_Zn2O8N2-ADC_A-AZO_A_No302	Zn2C42Cl6H22N4O8	3.90162	6.06368	2.16206	-4.97856	-2.8165	84	GMOF						FALSE	FALSE	FALSE
qmof-5c2af2c	gmof_Zn2O8N2-ADC_A-BDC_A_No31	Zn2Br4C36H20N2O8	3.5354	5.57164	2.03623	-4.21568	-2.17945	72	GMOF						FALSE	FALSE	FALSE
qmof-258a220	gmof_Zn2O8N2-ADC_A-BDC_A_No817	Zn2C36H44N22O8	2.21707	4.06811	1.85105	-2.50708	-0.65603	112	GMOF						FALSE	FALSE	FALSE
qmof-94e212d	gmof_Zn2O8N2-ADC_A-DPAC_A_No320	Zn2C48Cl2H34N2O8	3.5091	5.62373	2.11463	-4.64243	-2.5278	96	GMOF						FALSE	FALSE	FALSE
qmof-c8c0b58	gmof_Zn2O8N2-ADC_A-DPAC_A_No550	Zn2C44Cl4F2H22N2O8	3.99206	6.06859	2.07653	-5.04966	-2.97313	84	GMOF						FALSE	FALSE	FALSE
qmof-27df637	gmof_Zn2O8N2-ADC_A-irmof14_A_No651	Zn4C96H68N20O16	2.85181	4.82845	1.97664	-3.51639	-1.53975	204	GMOF						FALSE	FALSE	FALSE
qmof-bd66dee	gmof_Zn2O8N2-ADC_A-irmof20_A_No421	Zn2BrC36F4H17N2O8S2	3.67525	5.82579	2.15054	-4.63756	-2.48702	72	GMOF						TRUE	FALSE	FALSE
qmof-9b1866d	gmof_Zn2O8N2-ADC_A-irmof20_A_No689	Zn2C36H25N7O10S2	3.04008	5.24497	2.20489	-4.02372	-1.81883	82	GMOF						FALSE	FALSE	FALSE
qmof-35c8beb	gmof_Zn2O8N2-ADC_A-irmof20_A_No806	Zn2Br2C36H20N2O12S2	3.33439	5.09683	1.76244	-3.88788	-2.12545	76	GMOF						FALSE	FALSE	FALSE
qmof-214a25c	gmof_Zn2O8N2-ADC_A-irmof20_A_No836	Zn2C38H22N2O16S2	3.25341	5.169	1.91559	-3.89667	-1.98108	82	GMOF						FALSE	FALSE	FALSE
qmof-09319e1	gmof_Zn2O8N2-ADC_A-irmof6_A_No723	Zn2Br2C38H24N2O12	3.25928	5.00959	1.7503	-3.73252	-1.98222	80	GMOF						FALSE	FALSE	FALSE
qmof-e34c36e	gmof_Zn2O8N2-ADC_A-irmof7_A_No1040	Zn2Br2C40H24N2O12	3.27793	5.03048	1.75254	-3.66302	-1.91048	82	GMOF						FALSE	FALSE	FALSE
qmof-decffa9	gmof_Zn2O8N2-ADC_A-irmof7_A_No1057	Zn2C44H34N2O12	3.20713	4.98411	1.77699	-3.63858	-1.86159	94	GMOF						FALSE	FALSE	FALSE
qmof-431f8cc	gmof_Zn2O8N2-ADC_A-irmof7_A_No26	Zn2C40H26N2O12	3.2275	4.98492	1.75742	-3.77116	-2.01375	82	GMOF						FALSE	FALSE	FALSE
qmof-7f11edf	gmof_Zn2O8N2-ADC_A-irmof7_A_No379	Zn2C40Cl4H22N2O14	3.96185	4.80063	0.838777	-3.13554	-2.29676	84	GMOF						FALSE	FALSE	FALSE
qmof-d6239ff	gmof_Zn2O8N2-ADC_A-irmof7_A_No43	Zn2C40F4H22N2O8	3.53305	5.6372	2.10415	-4.33185	-2.2277	78	GMOF						FALSE	FALSE	FALSE
qmof-e86fcce	gmof_Zn2O8N2-ADC_A-irmof7_A_No787	Zn2Br2C40H40N18O8	2.2193	4.22456	2.00526	-2.48746	-0.482194	110	GMOF						FALSE	FALSE	FALSE
qmof-1ff5688	gmof_Zn2O8N2-ADC_A-irmof8_A_No50	Zn2Br10C40H16N2O8	3.91429	6.11964	2.20535	-4.52034	-2.31499	78	GMOF						FALSE	FALSE	FALSE
qmof-6d62075	gmof_Zn2O8N2-AZO_A-irmof14_A_No372	Zn4Br8C92H48N16O16	3.73878	5.78336	2.04458	-4.19483	-2.15025	184	GMOF						TRUE	FALSE	FALSE
qmof-6127dd2	gmof_Zn2O8N2-AZO_A-irmof14_A_No394	Zn4C92F8H44N12O16	3.94911	5.77004	1.82093	-4.38953	-2.5686	176	GMOF						FALSE	FALSE	FALSE
qmof-7bb0742	gmof_Zn2O8N2-BDC_A-DPAC_A_No542	Zn4C50F5H27N4O16	3.72507	6.02856	2.30349	-4.05834	-1.75485	106	GMOF						TRUE	FALSE	FALSE
qmof-a3576ea	gmof_Zn2O8N2-BDC_A-DPAC_A_No585	Zn4C48F14H14N4O16	4.44167	6.71748	2.27581	-4.2481	-1.97228	100	GMOF						FALSE	FALSE	FALSE
qmof-9f20c48	gmof_Zn2O8N2-BDC_A-DPAC_A_No635	Zn4C48F20H8N4O20	4.0883	6.29454	2.20624	-4.01307	-1.80683	104	GMOF						FALSE	FALSE	FALSE
qmof-628ac43	gmof_Zn2O8N2-BDC_A-irmof10_A_No231	Zn4C46F5H23N4O18	3.76347	6.03637	2.2729	-3.9432	-1.6703	100	GMOF						TRUE	FALSE	FALSE
qmof-03b6f67	gmof_Zn2O8N2-BDC_A-irmof14_A_No133	Zn4C54Cl20H16N4O16	4.00219	5.66654	1.66436	-2.16279	-0.498437	114	GMOF						FALSE	FALSE	FALSE
qmof-8f38e7a	gmof_Zn2O8N2-DPAC_A-irmof14_A_No414	Zn4C100H48N4O42S2	4.85151	6.84798	1.99647	-5.36503	-3.36856	200	GMOF						FALSE	FALSE	FALSE
qmof-bbf6020	gmof_Zn2O8N2-DPAC_A-irmof14_A_No633	Zn4C92H68N24O20	2.88437	4.99509	2.11073	-3.96671	-1.85598	208	GMOF						FALSE	FALSE	FALSE
qmof-2556db0	gmof_Zn2O8N2-DPAC_A-irmof14_A_No783	Zn4Br2C90H46N4O36	3.79695	5.78039	1.98344	-4.61627	-2.63283	182	GMOF						FALSE	FALSE	FALSE
qmof-8fbcfd3	gmof_Zn2O8N2-DPAC_A-irmof20_A_No377	Zn4C92H42N4O40S2	4.79375	7.18522	2.39147	-5.69693	-3.30545	184	GMOF						FALSE	FALSE	FALSE
qmof-b2fa897	gmof_Zn2O8N2-DPAC_A-irmof20_A_No771	Zn4C81H32N14O38S2	5.09536	6.94652	1.85116	-5.48424	-3.63307	171	GMOF						FALSE	FALSE	FALSE
qmof-48a8af6	gmof_Zn2O8N2-DPAC_A-irmof6_A_No347	Zn4C92F2H44N4O36	4.86689	6.99464	2.12775	-5.48362	-3.35587	182	GMOF						FALSE	FALSE	FALSE
qmof-78c366c	gmof_Zn2O8N2-DPAC_A-irmof6_A_No417	Zn4C82ClF20H25N4O16	4.395	6.53323	2.13823	-5.2481	-3.10987	152	GMOF						FALSE	FALSE	FALSE
qmof-477bf52	gmof_Zn2O8N2-DPAC_A-irmof6_A_No61	Zn4Br12C82H34N4O16	3.98381	6.20632	2.22251	-4.88746	-2.66495	152	GMOF						FALSE	FALSE	FALSE
qmof-9576ffc	gmof_Zn2O8N2-DPAC_A-irmof7_A_No107	Zn4Br20C86H26N4O20	4.34391	6.37075	2.02684	-4.75475	-2.72791	160	GMOF						FALSE	FALSE	FALSE
qmof-c7f2375	gmof_Zn2O8N2-DPAC_A-irmof7_A_No596	Zn4C84Cl2F20H24N4O16	4.36232	6.37791	2.0156	-5.05869	-3.04309	154	GMOF						FALSE	FALSE	FALSE
qmof-46f2ccb	gmof_Zn2O8N2-DPAC_A-irmof7_A_No682	Zn4C84F20H26N4O22	4.43889	5.0058	0.566909	-3.74321	-3.1763	160	GMOF						FALSE	FALSE	FALSE
qmof-0dc00e5	gmof_Zn2O8N2-DPAC_A-irmof8_A_No229	Zn4C94H66N4O18	3.44413	5.5811	2.13697	-4.52725	-2.39027	186	GMOF						FALSE	FALSE	FALSE
qmof-9fd01d7	gmof_Zn2O8N2-DPAC_A-irmof8_A_No679	Zn4C84H58N16O16	3.14406	4.97037	1.82631	-3.9514	-2.12509	178	GMOF						FALSE	FALSE	FALSE
qmof-77e8bf6	gmof_Zn2O8N2-irmof10_A-irmof20_A_No157	Zn4C61Cl6H30N4O16S6	3.60204	5.76786	2.16582	-4.01553	-1.84972	127	GMOF						TRUE	TRUE	FALSE
qmof-791707c	gmof_Zn2O8N2-irmof10_A-irmof6_A_No30	Zn4C64H42N4O19	3.42581	5.48337	2.05756	-3.87573	-1.81817	133	GMOF						FALSE	FALSE	FALSE
qmof-a960f82	gmof_Zn2O8N2-irmof10_A-irmof6_A_No487	Zn4C64H42N4O25	3.21244	5.4951	2.28266	-3.81205	-1.52938	139	GMOF						FALSE	FALSE	FALSE
qmof-93db7c2	gmof_Zn2O8N2-irmof10_A-irmof7_A_No258	Zn4C76F6H48N4O16	3.45198	5.51844	2.06646	-3.4711	-1.40463	154	GMOF						FALSE	FALSE	FALSE
qmof-25a03d3	gmof_Zn2O8N2-irmof14_A-irmof20_A_No75	Zn4Br12C70H18N4O22S6	3.73731	5.96391	2.2266	-3.47412	-1.24752	136	GMOF						TRUE	FALSE	FALSE
qmof-8529597	gmof_Zn2O8N2-irmof14_A-irmof7_A_No160	Zn4C94F12H30N4O40	4.28976	6.2691	1.97934	-3.19948	-1.22014	184	GMOF						FALSE	FALSE	FALSE
qmof-c8ae741	gmof_Zn2O8N2-irmof14_A-irmof7_A_No378	Zn4C94H66N4O34S6	3.88761	5.7751	1.88749	-2.71821	-0.830728	208	GMOF						FALSE	FALSE	FALSE
qmof-87f5303	gmof_Zn2O8N2-irmof14_A-irmof8_A_No145	Zn4C82Cl6H36N4O22	3.75216	5.836	2.08384	-3.73687	-1.65303	154	GMOF						TRUE	FALSE	FALSE
qmof-f1859dd	gmof_Zn2O8N2-irmof14_A-irmof8_A_No360	Zn4C82F18H24N4O28	3.66088	5.60296	1.94208	-3.23811	-1.29603	160	GMOF						FALSE	FALSE	FALSE
qmof-7ee5c89	gmof_Zn2O8N2-irmof20_A-irmof6_A_No97	Zn4C47H26N4O18S10	3.33121	5.18325	1.85205	-3.07108	-1.21903	109	GMOF						FALSE	FALSE	FALSE
qmof-46ac557	gmof_Zn2O8N2-irmof6_A-irmof7_A_No219	Zn4C59Cl2H34N4O26	4.16159	6.46492	2.30333	-2.94924	-0.645907	129	GMOF						FALSE	FALSE	FALSE
qmof-8146e49	gmof_Zn2O8N2-irmof6_A-irmof7_A_No396	Zn4C54F2H39N9O16	3.20463	5.55588	2.35126	-2.5744	-0.223146	124	GMOF						FALSE	FALSE	FALSE
qmof-6e482fb	gmof_Zn2O8N2-irmof6_A-irmof7_A_No410	Zn4C54H39N11O20	3.53039	5.52291	1.99252	-2.39111	-0.398596	128	GMOF						FALSE	FALSE	FALSE
qmof-d192e8d	gmof_Zn2O8N2-irmof6_A-irmof7_A_No412	Zn4C54H44N16O20	3.10367	5.09435	1.99069	-1.93887	0.051817	138	GMOF						FALSE	FALSE	FALSE
qmof-bb51b6f	gmof_Zn2O8N2-irmof7_A-irmof8_A_No298	Zn4C68F10H34N4O16	4.26639	6.07412	1.80773	-2.75778	-0.950055	136	GMOF						FALSE	FALSE	FALSE
qmof-de5e312	gmof_Zn4O13-BDC_A_No21	Zn8C48H48N24O26	2.75641	4.77272	2.01631	-2.66864	-0.652332	154	GMOF						FALSE	FALSE	FALSE
qmof-c4714cc	gmof_Zn4O13-BDC_A-DPAC_A_No1256	Zn8C80H40O50	3.62787	5.71592	2.08805	-4.56661	-2.47856	178	GMOF						TRUE	TRUE	FALSE
qmof-bc8f74e	gmof_Zn4O13-BDC_A-DPAC_A_No1257	Zn8C80H40O50	3.27233	5.09331	1.82098	-4.03821	-2.21723	178	GMOF						FALSE	FALSE	FALSE
qmof-7277549	gmof_Zn4O13-BDC_A-DPAC_A_No317	Zn8C88H40N16O58	4.0284	6.02428	1.99588	-4.71411	-2.71823	210	GMOF						FALSE	FALSE	FALSE
qmof-a3c0179	gmof_Zn4O13-BDC_A-DPAC_A_No596	Zn8C88H40O58	4.35944	6.41828	2.05883	-5.10795	-3.04912	194	GMOF						FALSE	FALSE	FALSE
qmof-2cfb7a7	gmof_Zn4O13-BDC_A-DPAC_A_No72	Zn8C80H40O58	3.59099	5.79261	2.20162	-4.61043	-2.40881	186	GMOF						TRUE	TRUE	FALSE
qmof-8549a5b	gmof_Zn4O13-BDC_A-DPAC_A_No730	Zn8C80F8H32O58	3.92587	5.78806	1.86219	-4.58729	-2.7251	186	GMOF						FALSE	FALSE	FALSE
qmof-ad4a6de	gmof_Zn4O13-BDC_A-DPAC_A_No962	Zn8C80H64N24O26	2.6895	4.76035	2.07085	-3.52161	-1.45076	202	GMOF						FALSE	FALSE	FALSE
qmof-f0008e4	gmof_Zn4O13-BDC_A-DPAC_A_No964	Zn8C80H80N40O26	2.69398	4.66289	1.96892	-3.34193	-1.37302	234	GMOF						FALSE	FALSE	FALSE
qmof-ca7a99c	gmof_Zn4O13-BDC_A-imd_No27	Zn8C48H24O50	3.57668	5.53249	1.95582	-3.66803	-1.71221	130	GMOF						FALSE	FALSE	FALSE
qmof-730a3ab	gmof_Zn4O13-BDC_A-irmof20_A_No27	Zn16C96H32O68S16	3.27989	5.18578	1.90589	-3.63212	-1.72622	228	GMOF						FALSE	FALSE	FALSE
qmof-9adf032	gmof_Zn4O13-BDC_A-irmof20_A_No437	Zn16C96F16H24N8O52S16	3.29134	5.09765	1.80632	-3.48498	-1.67867	228	GMOF						FALSE	FALSE	FALSE
qmof-0496546	gmof_Zn4O13-BDC_A-irmof20_A_No461	Zn16C96H40N8O68S16	2.97254	5.04121	2.06868	-3.33116	-1.26248	244	GMOF						FALSE	FALSE	FALSE
qmof-8648a69	gmof_Zn4O13-BDC_A-irmof20_A_No574	Zn16C96H24N8O76S16	3.97683	5.90071	1.92388	-4.24266	-2.31878	236	GMOF						FALSE	FALSE	FALSE
qmof-726ab18	GOCSOI_FSR	CuC32H26N6O12	2.72511	6.31794	3.59282	-0.904645	2.68818	77	CSD						FALSE	FALSE	FALSE
qmof-aae4521	GOCZOQ_FSR	Cu2C50H30N6O8	3.20961	6.43214	3.22254	-0.843541	2.379	96	CSD						FALSE	FALSE	FALSE
qmof-b5a7513	GODDAH_FSR	Cu2C54H32N4O12	2.97819	6.20815	3.22995	-1.27004	1.95992	104	CSD						FALSE	FALSE	FALSE
qmof-3e22e52	GOGCAH_FSR	Cu2C14H18N2O14	3.4388	7.60295	4.16415	-1.95262	2.21153	50	CSD						FALSE	FALSE	FALSE
qmof-c28fec8	GOGKAP_FSR	Fe2C32Cl8H28O16	1.77483	5.89409	4.11927	0.323835	4.4431	86	CSD						FALSE	FALSE	FALSE
qmof-136fa43	GOHZAG01_FSR	Na2NiC28H46N6O16S4	2.8852	6.91895	4.03375	-1.18341	2.85034	103	CSD						FALSE	FALSE	FALSE
qmof-af5c9df	GOKDOA_FSR	Cu2C56H60N8O20	2.78309	6.20145	3.41836	-0.839454	2.5789	146	CSD						FALSE	FALSE	FALSE
qmof-7dcae20	GORCUL01_FSR	Cu2C32F12H16N4O8	2.89648	6.62119	3.72471	-0.927338	2.79737	74	CSD						FALSE	FALSE	FALSE
qmof-a248a94	GOWVEV_FSR	Cu2C40F8H36N8O8	2.5672	6.01305	3.44585	-1.13351	2.31234	102	CSD						FALSE	FALSE	FALSE
qmof-c6917b4	GOYRET_FSR	Ni2C20H16N28	2.5462	5.75708	3.21088	0.207543	3.41842	66	CSD						FALSE	FALSE	FALSE
qmof-6fd66b2	GOZTIA_FSR	Ni2C28H44N8O12	1.44669	5.46974	4.02305	-0.590887	3.43216	94	CSD						FALSE	FALSE	FALSE
qmof-b439f25	GUFBOA_FSR	Cd2C80H52N2O18S8	2.95643	4.78699	1.83056	0.072737	1.9033	162	CSD						FALSE	FALSE	FALSE
qmof-510e27f	GUJWAK_FSR	Ni2C46H36N8O12	1.69727	5.74833	4.05107	-0.672183	3.37888	104	CSD						FALSE	FALSE	FALSE
qmof-e4c240e	GUNCEZ_FSR	Cu2C36H28N8O8	3.58158	6.95635	3.37477	-1.38309	1.99167	82	CSD						FALSE	FALSE	FALSE
qmof-8242b5b	GUNYIZ_FSR	Zn2C64H44N8O4	3.33708	5.45091	2.11383	-1.1117	1.00213	122	CSD						FALSE	FALSE	FALSE
qmof-a996d0c	GURZID01_FSR	Cd4Cu4C24H48O48	3.33204	7.60694	4.2749	-1.57048	2.70442	128	CSD						FALSE	FALSE	FALSE
qmof-3d811dc	GUSCIH_FSR	Gd2Ni2C30H24N4O26	3.06136	6.91304	3.85168	-1.4314	2.42028	88	CSD						FALSE	FALSE	FALSE
qmof-a47217e	GUVBOP_FSR	V6Zn2C20H18N6O17	4.07717	5.94242	1.86525	0.337761	2.20302	69	CSD						FALSE	FALSE	FALSE
qmof-a23970b	GUVFIN_FSR	CuC16H12N10O2	3.11153	6.7932	3.68167	-1.87019	1.81147	41	CSD						FALSE	FALSE	FALSE
qmof-9ef6119	GUVHEL_FSR	Cu4C24H28I4N12O4	2.70163	5.45144	2.74981	0.552126	3.30194	76	CSD						FALSE	FALSE	FALSE
qmof-7e5ffee	GUWFAG_FSR	Ni2C44H40N8O10	1.82877	6.10193	4.27316	-0.887903	3.38526	104	CSD						FALSE	FALSE	FALSE
qmof-15fdf79	GUWLIV_FSR	Cu4C48H48N16O24	2.93702	6.89713	3.96011	-1.72444	2.23567	140	CSD						FALSE	FALSE	FALSE
qmof-46ab5ba	GUXQAS_FSR	Cu8C128F16H112N48O40	2.84043	6.98862	4.1482	-1.80362	2.34458	352	CSD						FALSE	FALSE	FALSE
qmof-e6770f4	GUYGAI_FSR	Cd2Cu2C20Cl4H20N8O12	4.46556	7.93137	3.46582	-1.33729	2.12853	68	CSD						FALSE	FALSE	FALSE
qmof-835ab05	GUYGIQ_FSR	Cd4Cu2C20Cl8H24N8O14	4.27034	7.46065	3.19031	-1.49918	1.69113	80	CSD						FALSE	FALSE	FALSE
qmof-7c33b5f	HACBUJ_FSR	Cu2C52H36N4O16	2.86484	6.71924	3.8544	-1.38706	2.46733	110	CSD						FALSE	FALSE	FALSE
qmof-011c3e3	HACTEM_FSR	Cu2C54F2H30N8O8	2.68016	5.39588	2.71571	0.181668	2.89738	104	CSD						FALSE	FALSE	FALSE
qmof-e268c52	HADMIL_FSR	Co2C28H24N8	2.14277	6.02044	3.87767	-0.860841	3.01683	62	CSD						FALSE	FALSE	FALSE
qmof-067c272	HAFCOJ_FSR	Fe2Ni2C24F4H12N16	3.58495	6.71669	3.13174	-0.470484	2.66126	60	CSD						FALSE	FALSE	FALSE
qmof-eaa4006	HAFDEA01_FSR	Fe2Pt2C24F4H12N16	3.51779	6.65557	3.13778	-0.622453	2.51533	60	CSD						FALSE	FALSE	FALSE
qmof-99810c8	HAGQOX_FSR	Co2C46H34N4O14	3.06602	5.99775	2.93173	-0.216805	2.71493	100	CSD						FALSE	FALSE	FALSE
qmof-ae5b951	HAGXAP_FSR	Cu2Br2C20H16N4S2	2.39107	4.86405	2.47298	0.834712	3.30769	46	CSD						FALSE	FALSE	FALSE
qmof-14291f8	HAJLIO_FSR	Fe3C66H84N30S6	0.894555	5.26954	4.37498	-0.088729	4.28625	189	CSD						FALSE	FALSE	FALSE
qmof-02d6206	HALPUI_FSR	FePdC20H16N12S2	3.24157	5.97836	2.73679	-0.350223	2.38657	52	CSD						FALSE	FALSE	FALSE
qmof-ccbc5fe	HALTUM_FSR	Ni8C104H84N4O40	2.55248	6.23603	3.68355	-1.29053	2.39302	240	CSD						FALSE	FALSE	FALSE
qmof-b92e7e5	HALYAX_FSR	Co2C46H30N4O10	3.26308	6.37201	3.10893	0.000727	3.10965	92	CSD						FALSE	FALSE	FALSE
qmof-808b97f	HARKOD_FSR	Ca2CuC18H10O14	3.68316	7.05292	3.36976	-0.748134	2.62162	45	CSD						FALSE	FALSE	FALSE
qmof-14733c4	HAVFAM_FSR	Co2C44H32N8O8	2.58203	6.45545	3.87342	-1.19788	2.67554	94	CSD						FALSE	FALSE	FALSE
qmof-e8f57aa	HAWBOY_FSR	CuC16H18N4O4	2.89791	6.8033	3.90539	-0.891438	3.01396	43	CSD						FALSE	FALSE	FALSE
qmof-569fecc	HAWSEG_FSR	CuC42F6H32N12O6S2	3.24216	6.85851	3.61635	-1.15715	2.4592	101	CSD						FALSE	FALSE	FALSE
qmof-3d489e4	HAWTUW_FSR	Cu4C8H8I4N4S2	3.34385	5.34877	2.00492	2.30456	4.30948	30	CSD						FALSE	FALSE	FALSE
qmof-e5198b3	HAWZEM_FSR	Cu4C48H32N8O16	2.6905	6.69639	4.00589	-2.66757	1.33831	108	CSD						FALSE	FALSE	FALSE
qmof-87d4896	HAYYOY_FSR	Fe6C24Cl6H6N18O6	3.51367	6.36404	2.85037	-1.80014	1.05023	66	CSD						FALSE	FALSE	FALSE
qmof-d5c113e	HAYZOY_FSR	Ag8C40H24N24O24	3.7399	6.5509	2.811	0.2467	3.0577	120	CSD						FALSE	FALSE	FALSE
qmof-77e8a1f	HEDNEL01_FSR	Cu4C48H32N8O20	3.32311	6.96563	3.64253	-0.490987	3.15154	112	CSD						FALSE	FALSE	FALSE
qmof-2f1a847	HEFBEB01_FSR	Co2C66H48N4O12	2.43539	5.69321	3.25781	-0.46556	2.79225	132	CSD						FALSE	FALSE	FALSE
qmof-9b0bbdf	HEFCIF_FSR	CuC18H14N12	2.97383	6.72228	3.74845	-1.05889	2.68956	45	CSD						FALSE	FALSE	FALSE
qmof-5a8d3cc	HEFNUD_FSR	Cu2C44H40N8O14	2.66787	6.87778	4.20991	-1.55797	2.65194	108	CSD						FALSE	FALSE	FALSE
qmof-1eebafa	HEFZUO_FSR	ZnC22H24N4O4	3.25143	5.59248	2.34105	-0.992473	1.34858	55	CSD						FALSE	FALSE	FALSE
qmof-7375a78	HEJCIL_FSR	Cu4C112H80N8O16	3.0766	6.24145	3.16485	-3.21445	-0.049597	220	CSD						FALSE	FALSE	FALSE
qmof-938e4e7	HEJCOR_FSR	Cu2C56H40N4O8	3.22045	6.13886	2.91841	-1.80016	1.11825	110	CSD						FALSE	FALSE	FALSE
qmof-15486a3	HEQLOH_FSR	Cu2K2C36H24N4O4	2.60961	4.97764	2.36803	0.465494	2.83353	72	CSD						FALSE	FALSE	FALSE
qmof-ae979f1	HERMEZ01_FSR	Ag8Fe4C64H40N40	2.73898	5.40501	2.66603	-2.0706	0.59543	156	CSD						FALSE	FALSE	FALSE
qmof-5f9a1bc	HERNEA01_FSR	Ag8Fe4C64H40N40	2.74066	5.66376	2.9231	-2.29969	0.623403	156	CSD						FALSE	FALSE	FALSE
qmof-4f49da6	HERPUQ_FSR	Cu2Br2C34H30N8O8	2.54948	6.5744	4.02492	-1.46682	2.5581	84	CSD						FALSE	FALSE	FALSE
qmof-42b8b59	HIFNIU_FSR	U4C56H48N8O32	2.91992	5.79797	2.87805	-0.560527	2.31752	148	CSD						FALSE	FALSE	FALSE
qmof-ab2c780	HIFPAO_FSR	Ag4C12H12N8O10S2	3.80295	6.48101	2.67806	-0.017422	2.66064	48	CSD						FALSE	FALSE	FALSE
qmof-ed94e56	HIHFAH_FSR	Ni2C56H40N12	3.23575	5.66489	2.42914	0.017691	2.44683	110	CSD						FALSE	FALSE	FALSE
qmof-93977b0	HIHLUH_FSR	Cu4U4C56H32N8O40	3.22585	6.78749	3.56164	-0.757561	2.80408	144	CSD						FALSE	FALSE	FALSE
qmof-108b337	HINPEB_FSR	NiC30H28N8O6	2.50072	6.31199	3.81127	-0.857453	2.95382	73	CSD						FALSE	FALSE	FALSE
qmof-9dce9f9	HINROO_FSR	CoC30Cl2H24N4O6	2.22889	5.5213	3.29241	0.038261	3.33067	67	CSD						FALSE	FALSE	FALSE
qmof-29090e7	HINVIL_FSR	CoC30H28N8O6	2.41751	5.93467	3.51716	-0.388792	3.12837	73	CSD						FALSE	FALSE	FALSE
qmof-35562f1	HIQPEE_FSR	Co2C20H24N8	2.23097	5.47622	3.24525	-0.635922	2.60932	54	CSD						FALSE	FALSE	FALSE
qmof-53516e2	HIQYIQ_FSR	Cu8C56H56N8O48	3.78694	7.84647	4.05953	-1.68217	2.37736	176	CSD						FALSE	FALSE	FALSE
qmof-14b170b	HISLEB_FSR	Ni2C20H20N16	1.88598	5.54355	3.65756	-0.499904	3.15766	58	CSD						FALSE	FALSE	FALSE
qmof-5dfdc69	HISVIR_FSR	Co2C58H56N8O8	2.78613	6.75939	3.97326	-1.09546	2.87781	132	CSD						FALSE	FALSE	FALSE
qmof-73aa17b	HIXZUL_FSR	Cu4C16H24N4O14P4	3.12338	6.49083	3.36745	0.073648	3.44109	66	CSD						FALSE	FALSE	FALSE
qmof-c4c5c23	HOBFAI_FSR	CuC50H54O16	2.42003	5.99507	3.57503	-0.991345	2.58369	121	CSD						FALSE	FALSE	FALSE
qmof-b874271	HOFZAD_FSR	Au2Na2C48Cl8H56N16O16	4.59384	6.48346	1.88962	-0.602133	1.28749	148	CSD						FALSE	FALSE	FALSE
qmof-cfc442e	HOMDOE_FSR	Ni2C54H56N8O14	2.44469	5.2115	2.76682	-0.607906	2.15891	134	CSD						FALSE	FALSE	FALSE
qmof-2dc3acb	HOMTIM_FSR	Co2C36H36N4O12	2.85369	2.98209	0.128403	0.627926	0.756329	90	CSD						FALSE	FALSE	FALSE
qmof-94e2360	HOQFAU_FSR	Ag2C8H8N6O4	3.12532	5.73813	2.61281	0.116657	2.72947	28	CSD						FALSE	FALSE	FALSE
qmof-a5caf55	HOQYIW_FSR	Cu2C36H26N4O12P2S2	3.34783	7.05464	3.70681	-0.899592	2.80722	84	CSD						FALSE	FALSE	FALSE
qmof-95ef7fc	HORTAK_FSR	Cu2C14H16O14	3.27764	6.59971	3.32207	-1.44817	1.8739	46	CSD						FALSE	FALSE	FALSE
qmof-a4214c3	HORWIU_FSR	Cu4C6H6I4N6	2.65247	4.87579	2.22332	2.1616	4.38492	26	CSD						FALSE	FALSE	FALSE
qmof-83c480c	HOSPEL_FSR	Cu4C12Cl2H8N10	3.00599	5.52201	2.51601	1.38661	3.90262	36	CSD						FALSE	FALSE	FALSE
qmof-e0ed021	HOTREO01_FSR	Cu2C32H36N4O10	4.06431	7.41896	3.35465	-1.3929	1.96175	84	CSD						FALSE	FALSE	FALSE
qmof-2b1aba1	HOXDII_FSR	Cu4Br4C56H48N24	2.46867	5.06192	2.59325	0.379482	2.97273	136	CSD						FALSE	FALSE	FALSE
qmof-a4541ac	HOXFEG_FSR	Cu6Br6C30H28N12	2.91825	5.43446	2.51621	0.729432	3.24564	82	CSD						FALSE	FALSE	FALSE
qmof-bd9a33a	HOYMUD02_FSR	Cu4C12H8N8S4	2.82428	5.35662	2.53234	1.31568	3.84802	36	CSD						FALSE	FALSE	FALSE
qmof-a918c8a	HUCXEK_FSR	Tb4C100H84N16O28	3.44926	6.15093	2.70167	-1.89755	0.804118	232	CSD						FALSE	FALSE	FALSE
qmof-7015fdd	HUCXIO_FSR	Dy4C100H84N16O28	3.44903	6.16329	2.71426	-1.87364	0.840622	232	CSD						FALSE	FALSE	FALSE
qmof-e0cb981	HUCXOU_FSR	Ho4C100H84N16O28	3.43385	6.13282	2.69897	-1.87764	0.821329	232	CSD						FALSE	FALSE	FALSE
qmof-c946ba5	HUJHUP01_FSR	Cu4C8H8I4N4	2.70163	4.89428	2.19265	2.19796	4.39062	28	CSD						FALSE	FALSE	FALSE
qmof-beeff21	HUMPOV_FSR	Na4C12Cl4H8O12	3.95033	6.13613	2.1858	0.302103	2.4879	40	CSD						FALSE	FALSE	FALSE
qmof-d5c670c	HUQZEA_FSR	CuC10Cl2H12N4O4	3.24198	7.08825	3.84627	-1.20012	2.64615	33	CSD						FALSE	FALSE	FALSE
qmof-547262c	HUZQAV_FSR	CoC32H26N10O6	3.11022	6.68092	3.5707	-0.722866	2.84783	75	CSD						FALSE	FALSE	FALSE
qmof-459525d	HUZRIE_FSR	Zn2C36H40N4O4S8	3.8945	6.17887	2.28437	-0.287495	1.99688	94	CSD						FALSE	FALSE	FALSE
qmof-f1d2550	IBAGOI01_FSR	Cu2C24H24N6O12	3.38143	7.25791	3.87648	-0.943523	2.93296	68	CSD						FALSE	FALSE	FALSE
qmof-55ae928	IBARUA_FSR	Cu6Er4C48H60N12O48	2.17487	6.25018	4.07531	-2.01069	2.06463	178	CSD						FALSE	FALSE	FALSE
qmof-648d493	IBASUB_FSR	Cu6Sm4C48H60N12O48	2.14876	6.24551	4.09675	-2.0775	2.01925	178	CSD						FALSE	FALSE	FALSE
qmof-17e43c6	IBATEM_FSR	Cu6Gd4C48H60N12O48	2.14228	6.23973	4.09745	-2.01416	2.08329	178	CSD						FALSE	FALSE	FALSE
qmof-55c6596	ICACAS_FSR	Cu4Br4C24H16N8S4	2.58359	5.0148	2.43121	1.56865	3.99986	60	CSD						FALSE	FALSE	FALSE
qmof-51ef3ab	IDAPEI_FSR	Cu4C40H40N8O16P4	3.25184	5.51425	2.26241	-0.064578	2.19783	112	CSD						FALSE	FALSE	FALSE
qmof-73c6760	IDEJAE_FSR	Ni2C24H32N12	1.11665	5.60874	4.49208	-1.02501	3.46707	70	CSD						FALSE	FALSE	FALSE
qmof-6812d65	IDIWOH01_FSR	V4C32H16O20	3.32268	6.84217	3.51949	-3.6424	-0.122904	72	CSD						FALSE	FALSE	FALSE
qmof-7245894	IDIWOH02_FSR	V2C16H8O10	3.35272	6.82763	3.47492	-3.63956	-0.16464	36	CSD						FALSE	FALSE	FALSE
qmof-32f203f	IDUSIM01_FSR	Cu4C64H40N8O20	3.45441	6.58096	3.12655	-1.22407	1.90248	136	CSD						FALSE	FALSE	FALSE
qmof-652d6b7	IDUTIN_FSR	Cu4C56H32N8O20	3.43064	6.55538	3.12474	-1.55669	1.56805	120	CSD						FALSE	FALSE	FALSE
qmof-c585aa5	IFUJUQ_FSR	Cu2C32H28N4O22	4.16511	7.9122	3.74709	-1.28495	2.46213	88	CSD						FALSE	FALSE	FALSE
qmof-3bb4061	IFUKAW_FSR	Ni2C26H22N4O12	3.21823	7.01475	3.79651	-1.73298	2.06353	66	CSD						FALSE	FALSE	FALSE
qmof-061fb4f	IGEMEN_FSR	Mo8NiC16H22N8O28	3.46219	6.88845	3.42626	0.305216	3.73148	83	CSD						FALSE	FALSE	FALSE
qmof-3f72d8d	IGEMIR_FSR	Cu4Mo8C32H32N16O26	3.42953	5.51103	2.0815	0.952151	3.03365	118	CSD						FALSE	FALSE	FALSE
qmof-51faf5d	IGOZIN_FSR	Ni2C32H28N4O12	4.05168	6.85212	2.80044	-0.697387	2.10305	78	CSD						FALSE	FALSE	FALSE
qmof-76d9b07	IHIBOQ_FSR	Cu4Fe4C56H48I4N8	2.35146	4.98387	2.63241	0.739722	3.37213	124	CSD						FALSE	FALSE	FALSE
qmof-c0bb078	IHOZOV_FSR	Cu2C36H28N12O8S8	2.98058	6.49971	3.51913	-0.347302	3.17183	94	CSD						FALSE	FALSE	FALSE
qmof-a4420e2	IJEDEH_FSR	Cu4C68H40N8O24	3.56847	7.31802	3.74955	-1.11827	2.63128	144	CSD						FALSE	FALSE	FALSE
qmof-b65c1f5	IJEKIS_FSR	Cu2Hg2C28Cl8H32N16	3.35229	7.04548	3.69319	-1.44921	2.24398	88	CSD						FALSE	FALSE	FALSE
qmof-111ce53	IJEXUR_FSR	Zn5C46H38N12O20S2	4.1316	6.8129	2.68129	-2.60729	0.073999	123	CSD						FALSE	FALSE	FALSE
qmof-9a7a487	IJEZEE_FSR	Cu2La2C30H26N4O26	3.80882	7.76436	3.95554	-1.22856	2.72697	90	CSD						FALSE	FALSE	FALSE
qmof-2c4e323	IJEZOO_FSR	Cu2Nd2C30H26N4O26	3.72409	7.73694	4.01285	-1.49406	2.51879	90	CSD						FALSE	FALSE	FALSE
qmof-a65e183	IJEZUU_FSR	Cu2Sm2C30H26N4O26	3.74853	7.71206	3.96353	-1.47078	2.49274	90	CSD						FALSE	FALSE	FALSE
qmof-15285c1	IJIRUP_FSR	Cu2Hg2C30Cl8H22N6	3.44406	6.96506	3.521	-0.934869	2.58613	70	CSD						FALSE	FALSE	FALSE
qmof-e48a7ff	IJUBUK01_FSR	Cu4C16H16N8S4	2.69141	4.95134	2.25993	1.20622	3.46615	48	CSD						FALSE	FALSE	FALSE
qmof-5cbefb9	IJUTAK_FSR	Fe4C28H36N4O28	2.87289	5.921	3.04812	0.347943	3.39606	100	CSD						FALSE	FALSE	FALSE
qmof-859616a	IKABIH_FSR	Ni2C16Cl2H14N6O6P2	2.52402	6.05287	3.52885	-0.34183	3.18702	48	CSD						FALSE	FALSE	FALSE
qmof-f2e16cf	IKEZIH_FSR	Ni2C14H14N2O12	3.12434	6.58178	3.45744	-0.996183	2.46125	44	CSD						FALSE	FALSE	FALSE
qmof-77765c8	ILECEI_FSR	Cu2C22H24N8O8	2.4947	6.54605	4.05135	-0.932295	3.11905	64	CSD						FALSE	FALSE	FALSE
qmof-69ba10c	ILULOQ_FSR	Cd4C20H16I8N8O8	3.63537	5.95527	2.3199	0.244622	2.56452	64	CSD						TRUE	TRUE	FALSE
qmof-d2eb739	IMADOQ_FSR	CoC12H8N10	2.64226	6.01944	3.37719	-0.497108	2.88008	31	CSD						FALSE	FALSE	FALSE
qmof-3f16763	IMADUW_FSR	FeC12H8N10	2.39123	5.56351	3.17228	-0.412045	2.76023	31	CSD						FALSE	FALSE	FALSE
qmof-9ed183c	IMAFOS_FSR	Mn4C32H16N32	2.82649	6.40303	3.57654	-0.915617	2.66092	84	CSD						FALSE	FALSE	FALSE
qmof-919ea19	IMEZUW_FSR	Mn4C24H40N4O20P4	1.78428	5.06274	3.27846	0.335823	3.61428	96	CSD						FALSE	FALSE	FALSE
qmof-7ac41d1	IMOVOW_FSR	Ag4C28H36N8O8	3.34764	5.90841	2.56077	0.018704	2.57947	84	CSD						FALSE	FALSE	FALSE
qmof-ec02694	IMULUX_FSR	Cu6C30H30I6N6S6	2.83973	5.14798	2.30825	0.844621	3.15287	84	CSD						FALSE	FALSE	FALSE
qmof-350f7da	IMUQEN_FSR	NiC28H26N2O10S2	2.74645	4.52972	1.78328	0.243407	2.02668	69	CSD						FALSE	FALSE	FALSE
qmof-9bc797a	IMUZIB_FSR	Cu4C66H40N8O14	3.28259	6.59276	3.31016	-1.546	1.76416	132	CSD						FALSE	FALSE	FALSE
qmof-8f1ddfa	INAKIT_FSR	Ni2C30H32N12O8	2.50146	6.36856	3.8671	-0.244522	3.62258	84	CSD						FALSE	FALSE	FALSE
qmof-d967b7b	INAZAY01_FSR	Cu2C32H40N4O12	2.25762	6.34675	4.08914	-1.20063	2.88851	90	CSD						FALSE	FALSE	FALSE
qmof-1a5f96c	INEFAK01_FSR	CuYb2C22H18N2O18	7.9088	7.93596	0.027153	-1.46795	-1.4408	63	CSD						FALSE	FALSE	FALSE
qmof-a770d67	INEPUO01_FSR	CuSm2C22H26N2O22	2.94305	7.091	4.14795	-1.25702	2.89093	75	CSD						FALSE	FALSE	FALSE
qmof-9c977f5	INEQEZ01_FSR	CuGd2C22H26N2O22	2.99508	7.1243	4.12922	-1.2088	2.92042	75	CSD						FALSE	FALSE	FALSE
qmof-0300d77	INEQID01_FSR	CuTb2C22H26N2O22	2.98185	7.10746	4.12561	-1.19962	2.92599	75	CSD						FALSE	FALSE	FALSE
qmof-7bea0fe	INIRUS_FSR	Co2C32H32N4O8	1.79713	5.68488	3.88776	0.268743	4.1565	78	CSD						FALSE	FALSE	FALSE
qmof-5250d6e	INOJIG_FSR	Ni2Rb2C6H6O12	1.56312	6.06192	4.4988	-1.15674	3.34206	28	CSD						FALSE	FALSE	FALSE
qmof-b1d7587	INOKAZ_FSR	Cs2Ni2C6H6O12	0.806063	6.24199	5.43593	-1.13677	4.29916	28	CSD						FALSE	FALSE	FALSE
qmof-91e9d17	INUNUB_FSR	Cu2C40H32N12O8	2.83866	6.2901	3.45143	-0.745404	2.70603	94	CSD						FALSE	FALSE	FALSE
qmof-32cb456	IPEDUC_FSR	Mn4C64H32N32	3.17415	6.16966	2.99552	-0.226726	2.76879	132	CSD						FALSE	FALSE	FALSE
qmof-3f821f2	IPEPIC_FSR	Cu2C24Cl2H16N10O8	3.25656	6.82946	3.5729	-1.04802	2.52488	62	CSD						FALSE	FALSE	FALSE
qmof-ac38828	IPINAY_FSR	Cu4C24H16N4O8	2.86254	5.22663	2.36409	0.531864	2.89596	56	CSD						FALSE	FALSE	FALSE
qmof-13dcf5f	IPIPII_FSR	Cu4C104H72N16O20	3.05039	6.11691	3.06652	-2.10492	0.961599	216	CSD						FALSE	FALSE	FALSE
qmof-d29181f	IPUXIB_FSR	Cu2C24H32N12O14	2.8732	6.05739	3.18419	-1.00713	2.17706	84	CSD						FALSE	FALSE	FALSE
qmof-57bd41b	IQASOI_FSR	Mn4C36H36N36	2.49796	5.35077	2.85282	0.413094	3.26591	112	CSD						FALSE	FALSE	FALSE
qmof-20020d6	IQERIF_FSR	Cu4K4C40H24N24	4.03014	6.39635	2.36621	-0.255182	2.11103	96	CSD						FALSE	FALSE	FALSE
qmof-401de6d	IQIRIJ_FSR	Rh4C72H52N4O16	2.81232	5.48985	2.67753	-0.949345	1.72818	148	CSD						FALSE	FALSE	FALSE
qmof-1647c66	IRACOU_FSR	Cu4C40H48O20S4	2.46499	5.68753	3.22254	-0.335237	2.8873	116	CSD						FALSE	FALSE	FALSE
qmof-ae8c853	IROROX_FSR	Cu4C72H56N16O16	2.77368	6.59372	3.82003	-2.52664	1.2934	164	CSD						FALSE	FALSE	FALSE
qmof-82e3584	IRORUD_FSR	Cu2C48H44N4O14	2.58709	5.95177	3.36468	-0.770081	2.5946	112	CSD						FALSE	FALSE	FALSE
qmof-a9002ca	ISILOM_FSR	Ni2C48H52N12O10	1.44934	5.49024	4.0409	-0.955177	3.08573	124	CSD						FALSE	FALSE	FALSE
qmof-e566fbb	ISOHEE_FSR	Zn2C36H22N6O8	3.25058	6.19888	2.9483	-3.6278	-0.679494	74	CSD						FALSE	FALSE	FALSE
qmof-7a117a2	ISOQAI_FSR	Co2C28H28N4O10S4	1.99353	5.93162	3.93809	-0.120976	3.81712	76	CSD						FALSE	FALSE	FALSE
qmof-69186ff	ISUFIL_FSR	Mn2C28H28N4O10S4	1.97198	5.47288	3.5009	0.241907	3.74281	76	CSD						FALSE	FALSE	FALSE
qmof-6898ab9	ISUFIL01_FSR	Mn2C28H28N4O10S4	2.40279	5.66142	3.25863	0.272393	3.53103	76	CSD						FALSE	FALSE	FALSE
qmof-25e44c3	ITOZEY_FSR	Cu2C34H30N4O12P2	3.67862	7.28337	3.60475	-0.950434	2.65431	84	CSD						FALSE	FALSE	FALSE
qmof-0df8088	ITOZUO_FSR	Cu2C38H26N4O10P2	3.31432	6.66561	3.35129	-0.952539	2.39875	82	CSD						FALSE	FALSE	FALSE
qmof-d21e6d3	IVIXIW_FSR	Ag2C26H18N4O4	3.69421	6.43509	2.74088	-0.444135	2.29674	54	CSD						FALSE	FALSE	FALSE
qmof-69fcbdc	IWAJEW_FSR	Zn2C40H24N12O8	3.91216	6.66151	2.74935	-2.30429	0.445059	86	CSD						FALSE	FALSE	FALSE
qmof-190750b	IWECIY_FSR	Ni2C44H44N8O18	2.86168	6.71557	3.85389	-1.45988	2.39401	116	CSD						FALSE	FALSE	FALSE
qmof-d01663e	IWEDEV_FSR	Cu4C88H80N16O28S4	2.83661	6.77705	3.94044	-1.71627	2.22417	220	CSD						FALSE	FALSE	FALSE
qmof-ba7c077	IWIVIV02_FSR	Cu4C8H4N16O8	3.87591	5.76921	1.89331	0.576935	2.47024	40	CSD						FALSE	FALSE	FALSE
qmof-4a5ca9f	IXACAL_FSR	Ni2C28H28N4O10S4	1.54518	5.73815	4.19297	-0.306311	3.88666	76	CSD						FALSE	FALSE	FALSE
qmof-b3d9e07	IXEBIW_FSR	Zn2C40H56N20O16	3.96361	6.96892	3.00531	-1.66643	1.33888	134	CSD						FALSE	FALSE	FALSE
qmof-993b30b	IXIHUS01_FSR	Co2Cu4C24H24N16	1.42678	5.56113	4.13435	0.307625	4.44198	70	CSD						FALSE	FALSE	FALSE
qmof-6694295	IXONUG_FSR	CuC30Cl2H28N4O4	2.54303	5.88132	3.3383	-0.411379	2.92692	69	CSD						FALSE	FALSE	FALSE
qmof-8d2aecd	IXOWAV_FSR	Co2C40H36N12O10	2.27907	5.85711	3.57803	-0.224018	3.35402	100	CSD						FALSE	FALSE	FALSE
qmof-7185c72	IYAREH_FSR	Mn2C36H36N8O10	2.02573	5.13403	3.1083	0.170973	3.27927	92	CSD						FALSE	FALSE	FALSE
qmof-1197fef	IYAROR_FSR	Ni2C36H36N8O10	1.98004	6.05835	4.0783	-0.599972	3.47833	92	CSD						FALSE	FALSE	FALSE
qmof-e9437e6	IYOTAT_FSR	Tb4C120H96N20O32	2.78814	5.58283	2.79469	-2.26561	0.529079	272	CSD						FALSE	FALSE	FALSE
qmof-b5c2834	IYUBAG_FSR	Co4C88Cl8H72N16	2.56399	6.8984	4.33441	-2.40221	1.9322	188	CSD						FALSE	FALSE	FALSE
qmof-0d326c4	IZIQOX_FSR	CoC40Cl2H36N8	2.9936	6.225	3.2314	-0.310364	2.92103	87	CSD						FALSE	FALSE	FALSE
qmof-0d0bec4	IZIQUD_FSR	CoC42H36N10S2	2.95419	5.69973	2.74553	-0.064419	2.68112	91	CSD						FALSE	FALSE	FALSE
qmof-efdc343	JADFOM_FSR	Ni2C52H44N12O14S2	2.8643	6.51336	3.64906	-0.875272	2.77379	126	CSD						FALSE	FALSE	FALSE
qmof-585e841	JALPAQ_FSR	Cu8C104H56N8O32	2.81703	6.55895	3.74193	-1.73231	2.00962	208	CSD						FALSE	FALSE	FALSE
qmof-1b23ab1	JAMSEY_FSR	Ni6C56H40N4O28	2.58251	6.30456	3.72205	-0.822025	2.90002	134	CSD						FALSE	FALSE	FALSE
qmof-0be7420	JAPYEH_FSR	Cu2Sm2C36H44I2N10O18	3.10971	5.11931	2.0096	-0.984854	1.02475	114	CSD						FALSE	FALSE	FALSE
qmof-7ac9c16	JAPYOR_FSR	Cu2Gd2C36H44I2N10O18	3.05612	5.09426	2.03814	-0.956166	1.08198	114	CSD						FALSE	FALSE	FALSE
qmof-7c74ed0	JAPYUX_FSR	Cu2Tb2C36H44I2N10O18	3.04564	5.0923	2.04667	-0.954126	1.09254	114	CSD						FALSE	FALSE	FALSE
qmof-52e1c67	JAPZAE_FSR	Cu2Dy2C36H44I2N10O18	3.04861	5.09669	2.04808	-0.946377	1.1017	114	CSD						FALSE	FALSE	FALSE
qmof-5b945c8	JAPZIM_FSR	Cu2Er2C36H44I2N10O18	3.04375	5.08039	2.03665	-0.966461	1.07018	114	CSD						FALSE	FALSE	FALSE
qmof-cfee5a8	JAPZOS_FSR	Cu2Yb2C36H44I2N10O18	2.69964	6.54409	3.84445	-2.79306	1.05139	114	CSD						FALSE	FALSE	FALSE
qmof-a41b944	JAPZUY_FSR	Cu2Y2C36H44I2N10O18	3.042	5.08405	2.04205	-0.937945	1.1041	114	CSD						FALSE	FALSE	FALSE
qmof-b5fc9ed	JAYNIJ_FSR	U2C66H76N24O28	4.66515	7.48259	2.81744	-1.64797	1.16948	196	CSD						FALSE	FALSE	FALSE
qmof-ab60730	JAZJEA_FSR	Ag2C22H22N4O6S2	3.6145	6.18889	2.57439	0.036429	2.61082	58	CSD						FALSE	FALSE	FALSE
qmof-a90117c	JAZJIE_FSR	Ag6C84H66N12O18S6	2.8256	5.58081	2.75521	-0.492313	2.26289	192	CSD						FALSE	FALSE	FALSE
qmof-2521623	JELVOM_FSR	Cu4C56H32N8O16	3.5201	7.15709	3.63699	-0.788772	2.84822	116	CSD						FALSE	FALSE	FALSE
qmof-663ff1d	JESXEL_FSR	Cu8C48Cl8H64N16	2.47009	4.88177	2.41168	0.740199	3.15188	144	CSD						FALSE	FALSE	FALSE
qmof-d4c1cf1	JESXEL01_FSR	Cu4C24Cl4H32N8	2.6311	4.99559	2.36449	0.492702	2.85719	72	CSD						FALSE	FALSE	FALSE
qmof-893d0b0	JETJAW_FSR	Co2Br8C54H40N8O8	3.54046	7.19757	3.65711	-0.911323	2.74579	120	CSD						FALSE	FALSE	FALSE
qmof-421c2b7	JETZUE01_FSR	Cu4C24H16N8S6	2.46158	4.93934	2.47777	1.13723	3.61499	58	CSD						FALSE	FALSE	FALSE
qmof-d6d1915	JEVBOC_FSR	Ni2C40H36N8O12S4	2.80317	6.32415	3.52098	-0.370827	3.15016	102	CSD						FALSE	FALSE	FALSE
qmof-285da54	JEXSEL_FSR	Ni2C20H20N8O8	1.19261	6.02605	4.83345	0.181467	5.01491	58	CSD						FALSE	FALSE	FALSE
qmof-01cfceb	JEXSIP_FSR	Cu4C40H40N16O16	2.38236	6.02463	3.64227	-0.686008	2.95626	116	CSD						FALSE	FALSE	FALSE
qmof-d698e20	JEXTUE_FSR	Ni2C24H24N12S4	1.91056	5.47406	3.5635	0.055367	3.61887	66	CSD						FALSE	FALSE	FALSE
qmof-b7f8729	JEZLIM_FSR	Mn2C44H34N8O8	2.86379	5.90193	3.03814	0.09984	3.13798	96	CSD						FALSE	FALSE	FALSE
qmof-2e6cac6	JIMRAZ_FSR	CoC24H24N4O8	3.59538	6.29321	2.69783	-0.507871	2.18996	61	CSD						FALSE	FALSE	FALSE
qmof-ab4fc49	JIQYIU_FSR	Cu2Br2C18H16N2O6	2.46446	5.65641	3.19195	0.196338	3.38829	46	CSD						FALSE	FALSE	FALSE
qmof-bbecd43	JOBKAP_FSR	Ni2C36H32N12O12	2.74965	6.45048	3.70083	-1.8879	1.81294	94	CSD						FALSE	FALSE	FALSE
qmof-dba9b91	JOBQUM_FSR	Ag4C48H24N20O12	3.48654	6.25682	2.77028	-0.498889	2.27139	108	CSD						FALSE	FALSE	FALSE
qmof-d46593c	JODVEG_FSR	Cu4C34H36I4N12	2.03971	4.42376	2.38405	1.1193	3.50335	90	CSD						FALSE	FALSE	FALSE
qmof-e8d1a8e	JODVIK_FSR	Cu2C32H30I2N10	2.65993	5.16738	2.50745	1.04491	3.55236	76	CSD						FALSE	FALSE	FALSE
qmof-e482ff6	JOFKOF_FSR	Cu2C48H52N8O10	2.71773	6.05922	3.3415	-0.882284	2.45921	120	CSD						FALSE	FALSE	FALSE
qmof-f16186c	JOFZOT_FSR	Ag4C32H36N8O20	3.21763	6.10617	2.88854	-0.36078	2.52776	100	CSD						FALSE	FALSE	FALSE
qmof-b265206	JOGQON_FSR	Ni2C80H68N8O16	3.39016	6.35046	2.9603	-1.26516	1.69514	174	CSD						FALSE	FALSE	FALSE
qmof-955f74a	JOHWIP_FSR	Cu4C52H36I4N4O4	2.88895	5.25145	2.3625	0.870808	3.23331	104	CSD						FALSE	FALSE	FALSE
qmof-ed04df4	JOLQAC_FSR	Cu2Ti2C40F12H40N8	2.9254	6.92581	4.00041	-2.12383	1.87658	104	CSD						FALSE	FALSE	FALSE
qmof-b1a98b4	JOXPET_FSR	Ag8C24H8N8O16	3.65402	6.28652	2.6325	0.938115	3.57062	64	CSD						FALSE	FALSE	FALSE
qmof-f3daf4c	JUFXOZ_FSR	Cu2K4C20H16O22	3.49546	7.30212	3.80666	-1.81869	1.98797	64	CSD						FALSE	FALSE	FALSE
qmof-f522cce	JUGFAU_FSR	Cu2C34H26N2O20S2	3.11823	6.46234	3.34412	-0.583884	2.76023	86	CSD						FALSE	FALSE	FALSE
qmof-1b76fc2	JULDEB_FSR	CuPdC16H14N6O2	2.79226	6.66019	3.86792	-1.47499	2.39293	40	CSD						FALSE	FALSE	FALSE
qmof-182ba74	JULQIS_FSR	Cu4C48F12H48N4O20	3.60499	7.5321	3.92711	-2.00303	1.92408	136	CSD						FALSE	FALSE	FALSE
qmof-7a701d8	JUMCUR_FSR	V4C48H52N4O20S4	3.13655	5.67322	2.53667	-0.697247	1.83942	132	CSD						FALSE	FALSE	FALSE
qmof-1bef540	JUMDEC_FSR	V4C48H48O20S4	3.39081	5.90085	2.51004	-0.925077	1.58497	124	CSD						FALSE	FALSE	FALSE
qmof-e0af624	JUPHEH_FSR	CuC12H12N2O6S2	3.21181	7.12417	3.91236	-1.02839	2.88397	35	CSD						FALSE	FALSE	FALSE
qmof-1a3858d	JUPHEH01_FSR	Cu2C24H24N4O12S4	3.15256	7.23265	4.0801	-1.27196	2.80814	70	CSD						FALSE	FALSE	FALSE
qmof-8b03127	JUXWOO_FSR	Ag4C24H16N8O12	3.78271	6.21635	2.43364	-0.075266	2.35837	64	CSD						TRUE	FALSE	FALSE
qmof-fd6d700	KADROY_FSR	Cu2C28H26N4O10	3.67956	7.01078	3.33122	-1.04401	2.28722	70	CSD						FALSE	FALSE	FALSE
qmof-7685f3d	KADTEQ_FSR	Cu2C18Cl4H18N2O10S2	2.80207	5.88956	3.08748	0.220196	3.30768	56	CSD						FALSE	FALSE	FALSE
qmof-7ec2a15	KAGKOV_FSR	NiC26H20N2O10	3.40209	6.55837	3.15627	-0.829096	2.32718	59	CSD						FALSE	FALSE	FALSE
qmof-25f9758	KALGEL_FSR	Fe2Ni4C100H80N8O18	2.47493	5.42966	2.95472	-1.35657	1.59816	212	CSD						FALSE	FALSE	FALSE
qmof-c4e84a2	KALHIO_FSR	Cu4C24Cl4H16N8	2.71764	4.87674	2.1591	0.513692	2.67279	56	CSD						FALSE	FALSE	FALSE
qmof-146e551	KALHOU_FSR	Cu4Br4C24H16N8	2.69826	4.79995	2.10169	0.377547	2.47924	56	CSD						FALSE	FALSE	FALSE
qmof-65f536b	KALMUG_FSR	Cu2C30H28N4O8	3.34276	6.70463	3.36186	-1.12928	2.23259	72	CSD						FALSE	FALSE	FALSE
qmof-d2b80ff	KAPQOJ_FSR	Cu4C24H20I4N12	2.39116	4.86295	2.47179	1.56972	4.04151	64	CSD						FALSE	FALSE	FALSE
qmof-89a5c57	KAQYOR_FSR	Cu2C24Cl2H16N2O2	2.91524	4.93553	2.02029	0.973501	2.99379	48	CSD						FALSE	FALSE	FALSE
qmof-0f7138b	KAVWOV_FSR	Ni2C44H40N4O8	2.86491	5.62941	2.7645	-0.482153	2.28234	98	CSD						FALSE	FALSE	FALSE
qmof-5fa242c	KAXKAY_FSR	Mn4C64H40N16O16	2.14621	5.33423	3.18802	-0.844376	2.34364	140	CSD						FALSE	FALSE	FALSE
qmof-4fbb0a5	KAXXAK_FSR	Mn2C34H24N12O8	2.18036	5.4626	3.28225	-0.037359	3.24489	80	CSD						FALSE	FALSE	FALSE
qmof-0ec2ee1	KAXXIS_FSR	Co4C100H80N24O16	2.48274	5.7159	3.23315	-0.814512	2.41864	224	CSD						FALSE	FALSE	FALSE
qmof-e96e55e	KAYKAZ_FSR	Zn4C82F12H48N4O16S4	4.25606	5.95932	1.70326	-1.09291	0.610353	170	CSD						FALSE	FALSE	FALSE
qmof-e2e748b	KEBWEU_FSR	Cu2V2C50H48N6O16P4	2.99339	6.30469	3.3113	-0.594902	2.71639	128	CSD						FALSE	FALSE	FALSE
qmof-7b81e21	KEFQAO_FSR	CuC26H20N6O14	3.70738	6.89836	3.19098	-1.11677	2.0742	67	CSD						FALSE	FALSE	FALSE
qmof-edfc49d	KEGVAW_FSR	Tl2U2C42H24I6O16	2.85975	5.57834	2.71859	0.263151	2.98175	92	CSD						FALSE	FALSE	FALSE
qmof-2c1dcb9	KEGVEA_FSR	Rb2U2C42H24I6O16	3.48352	6.14121	2.65769	0.112912	2.77061	92	CSD						FALSE	FALSE	FALSE
qmof-1e2a4e1	KEKJOB_FSR	Cu2C46H46N6O8	2.89926	5.98826	3.089	-1.35817	1.73083	108	CSD						FALSE	FALSE	FALSE
qmof-974b2cb	KENNAU_FSR	Cu2C4H8N16O4	3.50544	7.59925	4.09381	-0.831359	3.26245	34	CSD						FALSE	FALSE	FALSE
qmof-2fde3f7	KEQNUQ_FSR	CuC24Cl2H16N2O4	3.92864	6.94065	3.01201	-1.05005	1.96196	49	CSD						FALSE	FALSE	FALSE
qmof-dca4eee	KEQTEF_FSR	Cu2C16H16O12	3.49893	7.13236	3.63343	-1.10517	2.52826	46	CSD						FALSE	FALSE	FALSE
qmof-c9351f5	KESHEW_FSR	Co4C80H56N16O16S4	3.96216	6.43073	2.46857	-1.0541	1.41447	176	CSD						FALSE	FALSE	FALSE
qmof-37d5c1e	KESNON_FSR	Ni4C36H44N4O20	3.00634	6.32216	3.31582	-0.135781	3.18004	108	CSD						FALSE	FALSE	FALSE
qmof-4d83581	KESSOS01_FSR	Cu2C36H20N8O12	3.90318	6.43263	2.52945	0.085213	2.61467	78	CSD						FALSE	FALSE	FALSE
qmof-6977d9d	KETYAM01_FSR	Cr2C16H18N2O8	2.55716	4.73926	2.18209	0.586968	2.76906	46	CSD						FALSE	FALSE	FALSE
qmof-95efdd8	KEWMUW_FSR	Co2C50H40N8O8	2.26271	6.15911	3.8964	-2.17177	1.72463	108	CSD						FALSE	FALSE	FALSE
qmof-96bfe65	KEXDUN_FSR	Cu6Mo2C34H24N12O2S6	2.94387	5.12009	2.17622	-0.93562	1.2406	86	CSD						FALSE	FALSE	FALSE
qmof-ef3b26e	KEXFAV_FSR	Cu8W2C60H48I4N12S14	3.07856	5.58576	2.5072	-0.278757	2.22845	148	CSD						FALSE	FALSE	FALSE
qmof-5f6120f	KEXFOJ_FSR	Ag4C32H22N14S4	4.17665	6.16671	1.99006	0.349855	2.33992	76	CSD						FALSE	FALSE	FALSE
qmof-6d7fe34	KEXJUU_FSR	CuMo4C40H28N8O13	3.66267	6.61688	2.95421	-0.417665	2.53655	94	CSD						FALSE	FALSE	FALSE
qmof-06ab3b1	KEYDEZ_FSR	Ni4Br4C72H48N8O18S4	2.91402	6.27113	3.35712	-2.41237	0.944744	158	CSD						FALSE	FALSE	FALSE
qmof-0180057	KEYFIF01_FSR	Cu6C54H42N6O18	2.7644	6.12586	3.36145	-1.10126	2.26019	126	CSD						FALSE	FALSE	FALSE
qmof-72acbf0	KEZQAI_FSR	Cu4C96H72N8O28S4	3.18063	6.86732	3.68669	-2.06156	1.62513	212	CSD						FALSE	FALSE	FALSE
qmof-e100550	KIBCAA_FSR	Cu4Re4C16H16N8O16	3.42073	5.86241	2.44168	0.105625	2.5473	64	CSD						TRUE	TRUE	FALSE
qmof-43db536	KICQUL_FSR	Ni2C20H28N4O10	2.08895	6.26543	4.17647	-1.15791	3.01857	64	CSD						FALSE	FALSE	FALSE
qmof-dc0fa21	KICZOM_FSR	Cu8Br8C24H32N8	2.84969	5.23675	2.38707	0.97486	3.36193	80	CSD						FALSE	FALSE	FALSE
qmof-d5e2472	KIDLEP_FSR	Ni2C18H28N12O16	2.25243	6.86672	4.61429	-0.664144	3.95015	76	CSD						FALSE	FALSE	FALSE
qmof-82cbfbf	KIFPAR_FSR	Fe2C28H28N4O12	2.43792	5.3248	2.88687	-0.373652	2.51322	74	CSD						FALSE	FALSE	FALSE
qmof-3e65b16	KIGGEN_FSR	Cu2C32Cl12H24N8O12	2.49056	6.61395	4.12339	-1.40956	2.71382	90	CSD						FALSE	FALSE	FALSE
qmof-35f76d8	KIJRIG_FSR	Ag4C72H68N16O12	3.22378	5.69753	2.47375	-1.28752	1.18622	172	CSD						TRUE	TRUE	TRUE
qmof-0315b97	KIPXIT_FSR	Cu2C44Cl2H28N6O4	3.70962	6.8358	3.12618	-0.990083	2.1361	86	CSD						FALSE	FALSE	FALSE
qmof-d04a2a3	KIQLAX_FSR	Cu4Mo6C8H8N4O20	3.73136	5.57615	1.8448	2.20976	4.05455	50	CSD						FALSE	FALSE	FALSE
qmof-58cb01d	KIQZIW_FSR	K4C12H12N16O24	3.75293	6.00685	2.25392	-0.647438	1.60648	68	CSD						TRUE	FALSE	FALSE
qmof-10cf41c	KIVDID_FSR	Cu2Sm2C34H26N6O18S2	3.54695	5.90181	2.35486	-0.029391	2.32547	90	CSD						TRUE	TRUE	FALSE
qmof-d3fd7fc	KIVFUR_FSR	Zn2C48H36N8O8	3.76429	6.21791	2.45361	-0.880228	1.57339	102	CSD						TRUE	FALSE	FALSE
qmof-93c87bd	KIVVUH_FSR	Cu4C60H32N20	2.88141	5.18267	2.30125	0.605113	2.90637	116	CSD						FALSE	FALSE	FALSE
qmof-6bf0ec2	KIVWAO01_FSR	Cu4C44H32N12S4	2.76017	5.20257	2.44239	0.387341	2.82974	96	CSD						FALSE	FALSE	FALSE
qmof-21f2274	KIVYEU_FSR	Sr2C16H30N2O24	3.73996	6.56803	2.82806	-1.52318	1.30488	74	CSD						FALSE	FALSE	FALSE
qmof-0154f42	KIZXIA_FSR	Cu4C36Cl4H28N4	2.33226	4.72015	2.38789	0.942238	3.33013	76	CSD						FALSE	FALSE	FALSE
qmof-114133e	KIZXUM_FSR	Cu4C40H28N8S4	2.95385	5.18655	2.2327	0.839629	3.07233	84	CSD						FALSE	FALSE	FALSE
qmof-c064653	KOBGEO_FSR	Cu2C24H20N4O20P4	3.06664	7.43562	4.36898	-0.987396	3.38159	74	CSD						FALSE	FALSE	FALSE
qmof-f1c984a	KOBGOY01_FSR	Cu2C12H12N16O8	2.72351	6.84479	4.12128	-0.991806	3.12947	50	CSD						FALSE	FALSE	FALSE
qmof-77bd44c	KOBGOY02_FSR	Cu2C12H12N16O8	2.55384	6.54755	3.99371	-0.502362	3.49135	50	CSD						FALSE	FALSE	FALSE
qmof-399b130	KOHWUA_FSR	CuLa2C32H16N4O26	4.5096	8.11092	3.60132	-1.84177	1.75956	81	CSD						FALSE	FALSE	FALSE
qmof-c53c937	KOHXIP_FSR	CuC18H32N2O8P2	2.95224	6.7076	3.75536	-1.53351	2.22185	63	CSD						FALSE	FALSE	FALSE
qmof-21c3882	KOLKOL01_FSR	NiC18H22N4O8	2.8091	6.51041	3.70131	-0.942055	2.75925	53	CSD						FALSE	FALSE	FALSE
qmof-dc7e5a3	KOSKUA_FSR	Co6C24H12O18	3.74852	6.55996	2.81144	-2.92907	-0.11763	60	CSD						FALSE	FALSE	FALSE
qmof-9651473	KOWSOG_FSR	Ni2C46H44N8O10	2.03049	6.38143	4.35094	-0.973769	3.37717	110	CSD						FALSE	FALSE	FALSE
qmof-3597a65	KOXJIT_FSR	Co2C120Cl8H104N16O4S4	2.95927	5.7523	2.79303	-0.644467	2.14857	258	CSD						FALSE	FALSE	FALSE
qmof-954c057	KOYPAR_FSR	Cu2C40H40N8O8S2	2.93327	6.1892	3.25593	-1.67638	1.57955	100	CSD						FALSE	FALSE	FALSE
qmof-c82cbb7	KOZZOQ_FSR	CdC36H56N8O10P2	3.46422	6.44118	2.97696	-1.8707	1.10627	113	CSD						FALSE	FALSE	FALSE
qmof-ce0c773	KUBYIQ_FSR	Cu2C36H44N8O16	2.98047	5.85903	2.87856	-0.502048	2.37651	106	CSD						FALSE	FALSE	FALSE
qmof-26d536e	KUBYUC_FSR	Ni4C48H44N12O20	2.74539	6.73834	3.99295	-1.02465	2.9683	128	CSD						FALSE	FALSE	FALSE
qmof-3417ac3	KUCFUM_FSR	Cu2C30H24N2O12P4	3.04088	6.07062	3.02974	-0.799585	2.23015	74	CSD						FALSE	FALSE	FALSE
qmof-79c2418	KUCXUC_FSR	Cu4C32H28N8O4	3.3928	6.08179	2.68899	0.035543	2.72453	76	CSD						FALSE	FALSE	FALSE
qmof-e99de19	KUDLUR_FSR	Cu6Dy4C48H60N12O48	2.16383	6.25057	4.08674	-2.01017	2.07657	178	CSD						FALSE	FALSE	FALSE
qmof-20d0f7c	KULSAM_FSR	Ni2C40H56O14	2.29409	6.55788	4.26378	-1.77929	2.4845	112	CSD						FALSE	FALSE	FALSE
qmof-1a00b4b	KUQYAX_FSR	Cd2C48H48N4O22	3.8487	6.09399	2.24529	-0.783298	1.46199	124	CSD						FALSE	FALSE	FALSE
qmof-fbba869	KURKUE_FSR	Cu2C16H16N4O12	3.03535	7.3529	4.31755	-1.70968	2.60787	50	CSD						FALSE	FALSE	FALSE
qmof-129e3a9	KUVRUQ_FSR	Ni2C52H56N8O10	2.56424	6.98863	4.42439	-1.10023	3.32416	128	CSD						FALSE	FALSE	FALSE
qmof-26d6869	KUWRAW_FSR	Cu2C42H24N8O14	4.09949	7.74883	3.64934	-1.11988	2.52946	90	CSD						FALSE	FALSE	FALSE
qmof-6e89a67	KUXFAK_FSR	CuNa2C12H20N12O18	2.99259	7.4615	4.46891	-1.31773	3.15118	65	CSD						FALSE	FALSE	FALSE
qmof-f7de712	KUXTUT_FSR	Cu2C30H24N8O8	2.41226	6.46921	4.05695	-1.71077	2.34619	72	CSD						FALSE	FALSE	FALSE
qmof-b2fb769	KUYLEW_FSR	Cu2C36H28N4O12P4	2.9099	6.66921	3.75931	-0.720526	3.03878	86	CSD						FALSE	FALSE	FALSE
qmof-2d9f5f9	LACFIG_FSR	Cu16Br16C120H120N24O24	3.4551	5.66709	2.21198	-0.242636	1.96935	320	CSD						FALSE	FALSE	FALSE
qmof-0a13fbf	LADKAF_FSR	Cu2C46H32N4O20	3.31706	7.11931	3.80225	-1.26326	2.53899	104	CSD						FALSE	FALSE	FALSE
qmof-ad7adbe	LADYOH_FSR	CuU2C18H20N2O16	3.29769	6.84997	3.55229	-1.21808	2.3342	59	CSD						FALSE	FALSE	FALSE
qmof-e951f69	LAGRIX_FSR	Cu4C28Cl4H36N8S4	2.85132	5.03011	2.17879	0.931866	3.11065	84	CSD						FALSE	FALSE	FALSE
qmof-3301d94	LAJZOO_FSR	Cu2C50H34N4O14	2.78159	5.17288	2.39129	0.391975	2.78327	104	CSD						FALSE	FALSE	FALSE
qmof-8cd108f	LALBOR_FSR	Cu2Pt2C32H16N12	3.14801	6.40331	3.2553	-0.520003	2.7353	64	CSD						FALSE	FALSE	FALSE
qmof-83e56fe	LALFIO_FSR	Cu2C32H28N12O8S2	2.74671	6.74844	4.00173	-0.878897	3.12283	84	CSD						FALSE	FALSE	FALSE
qmof-1105864	LAQKAS_FSR	Co2C86H88N8O14	1.69194	5.68129	3.98935	-1.7386	2.25074	198	CSD						FALSE	FALSE	FALSE
qmof-458a962	LARZUB_FSR	CoC26H24N2O6S2	2.38207	5.97783	3.59576	-0.148272	3.44748	61	CSD						FALSE	FALSE	FALSE
qmof-cb3abbe	LASPOM_FSR	Cu4C92H52N8O16	2.36863	5.6671	3.29847	-1.56039	1.73808	172	CSD						FALSE	FALSE	FALSE
qmof-b46a7a6	LASQON_FSR	Ni3C54H40N12O14	2.1864	6.36429	4.17789	-1.4831	2.69479	123	CSD						FALSE	FALSE	FALSE
qmof-0c33be9	LASTAB_FSR	Cu2C20H32N2O10	2.78065	6.59188	3.81123	-1.1112	2.70003	66	CSD						FALSE	FALSE	FALSE
qmof-b4e6ea2	LASXUA_FSR	Co2C52H48N8O14	2.55904	6.45915	3.90011	-0.933235	2.96688	124	CSD						FALSE	FALSE	FALSE
qmof-a9f6b42	LATRAC_FSR	Cd2C42H32N4O16	4.2695	6.31057	2.04107	-0.933937	1.10713	96	CSD						FALSE	FALSE	FALSE
qmof-536a1f0	LAWLEC_FSR	Zn2C32H28N4O10S4	3.7288	5.72285	1.99405	-0.023113	1.97094	80	CSD						TRUE	FALSE	FALSE
qmof-3ada75c	LAXMOP_FSR	Mn8C24H16N56O4	2.73676	6.39277	3.656	-0.270564	3.38544	108	CSD						FALSE	FALSE	FALSE
qmof-fe916fb	LAYFIC_FSR	CoC24H20N10O6	2.13886	6.35113	4.21227	-1.68652	2.52576	61	CSD						FALSE	FALSE	FALSE
qmof-0444ac2	LAZDEW_FSR	Mn2C32H24N20	2.63042	5.39232	2.7619	0.455741	3.21764	78	CSD						FALSE	FALSE	FALSE
qmof-a745d46	LEFJAH01_FSR	Cu2C8H18N2O12	2.97245	7.29353	4.32107	-1.17687	3.1442	42	CSD						FALSE	FALSE	FALSE
qmof-602401f	LEJJIV01_FSR	Fe2C60H60N8O8	2.07341	4.72266	2.64925	0.158747	2.808	138	CSD						FALSE	FALSE	FALSE
qmof-2315a54	LEKJAO_FSR	Co2C22H24N4O8	2.73781	6.56125	3.82344	-0.600508	3.22293	60	CSD						FALSE	FALSE	FALSE
qmof-828f8b4	LELMOG_FSR	Cd2C30H24N4O12S4	3.39671	5.24616	1.84944	0.780679	2.63012	76	CSD						FALSE	FALSE	FALSE
qmof-2001a62	LELXIK_FSR	Cu4C74H44N8O18	3.17674	6.87335	3.69661	-1.88986	1.80675	148	CSD						FALSE	FALSE	FALSE
qmof-ccdbd1a	LEQCOB_FSR	Zn4C72H48N16O16	4.26127	7.29158	3.03031	-2.53777	0.492539	156	CSD						FALSE	FALSE	FALSE
qmof-f9dc87c	LETKOL01_FSR	Cu2C14Cl2H16N2O2	2.4212	6.30034	3.87914	-0.715687	3.16345	38	CSD						FALSE	FALSE	FALSE
qmof-3988bbf	LETMIJ_FSR	Ni2C52H60N8O14	3.15297	6.36835	3.21538	-1.11603	2.09934	136	CSD						FALSE	FALSE	FALSE
qmof-4f2b4da	LEWGUQ_FSR	Mn4C32H56N8O24	1.86894	5.45308	3.58414	-0.354185	3.22996	124	CSD						FALSE	FALSE	FALSE
qmof-d06ef43	LEWKEF_FSR	Co2C52H56N8O8	2.05023	6.06331	4.01308	-1.01541	2.99767	126	CSD						FALSE	FALSE	FALSE
qmof-3d44993	LEYFED_FSR	CoC32H32N8O6	2.56423	6.39047	3.82624	-0.558761	3.26748	79	CSD						FALSE	FALSE	FALSE
qmof-2aa8eb1	LICXAX_FSR	Co2C32F24H8N6O10S4	3.50895	5.51281	2.00386	0.227258	2.23112	86	CSD						FALSE	FALSE	FALSE
qmof-36e6f89	LICXEC_FSR	Cu8C112H80N64	2.69677	6.61112	3.91435	-1.15915	2.7552	264	CSD						FALSE	FALSE	FALSE
qmof-4b71659	LIDXUS_FSR	Cu8C48H64I8N16	2.65498	4.98121	2.32623	0.874676	3.20091	144	CSD						FALSE	FALSE	FALSE
qmof-92b4b13	LIDYAZ_FSR	Cu8C24H32I8N8	3.12124	5.32442	2.20318	1.79811	4.00129	80	CSD						FALSE	FALSE	FALSE
qmof-e5dde7a	LIFLUI_FSR	Cu2C40H52N4O12	2.59609	6.56034	3.96425	-1.68373	2.28052	110	CSD						FALSE	FALSE	FALSE
qmof-44b1658	LIGRAW_FSR	Co4C36H40N4O20P4	2.32319	6.58983	4.26664	-0.547982	3.71866	108	CSD						FALSE	FALSE	FALSE
qmof-5d3ef84	LIKBAJ_FSR	Cu8C136H144N16O40	2.50872	6.28761	3.77888	-2.11464	1.66424	344	CSD						FALSE	FALSE	FALSE
qmof-b32e4aa	LIPZER_FSR	V4C8F8H8N4O4	4.16568	7.72231	3.55663	-0.528745	3.02789	36	CSD						FALSE	FALSE	FALSE
qmof-984892e	LIQJEC_FSR	Zn12C184H144I24N48O10	3.77283	6.16597	2.39315	-2.33566	0.057491	422	CSD						TRUE	FALSE	FALSE
qmof-60f2715	LIRXUG_FSR	Ag4C20H12N24	2.24139	4.96719	2.7258	1.02358	3.74938	60	CSD						FALSE	FALSE	FALSE
qmof-272c907	LITCIC_FSR	Ni4C68H60O32	2.40778	5.12571	2.71794	-1.69261	1.02532	164	CSD						FALSE	FALSE	FALSE
qmof-5dcb48a	LIWHEF_FSR	Cu2C20Cl2H16N8O8	3.25614	5.61188	2.35574	-0.036082	2.31966	56	CSD						FALSE	FALSE	FALSE
qmof-04a6cff	LIWMOU_FSR	Mn4C28H36N4O28	2.74688	5.98357	3.23668	0.035256	3.27194	100	CSD						FALSE	FALSE	FALSE
qmof-0b22857	LIXROZ_FSR	Cu4C24H16I4O4S20	3.24439	5.4887	2.2443	2.02765	4.27195	72	CSD						FALSE	FALSE	FALSE
qmof-a8c7976	LODPUR_FSR	Zn2C44H32N12O4	1.82607	4.09633	2.27026	0.553333	2.82359	94	CSD						FALSE	FALSE	FALSE
qmof-93ed13d	LOJPAD_FSR	Mo6NiC16H20N6O22	3.686	6.95117	3.26517	0.236403	3.50157	71	CSD						FALSE	FALSE	FALSE
qmof-2b2a726	LONXER_FSR	Ni6C60H96N24O36S12	1.79157	6.18247	4.3909	-1.44418	2.94672	234	CSD						FALSE	FALSE	FALSE
qmof-c136b83	LOTQUG_FSR	Cu4C42H30N20	2.59111	4.68779	2.09668	0.020736	2.11742	96	CSD						FALSE	FALSE	FALSE
qmof-4577c03	LOVQUI_FSR	Zn2C40H56N20O16S4	3.91482	6.75051	2.83569	-1.1374	1.69829	138	CSD						FALSE	FALSE	FALSE
qmof-00afe28	LOVSOE_FSR	CuC11H6N7S	3.25971	5.35184	2.09213	0.28633	2.37846	26	CSD						FALSE	FALSE	FALSE
qmof-a879a21	LOVSUK_FSR	Cu4C14H12N8S4	3.15834	5.3368	2.17845	1.26941	3.44787	42	CSD						FALSE	FALSE	FALSE
qmof-29c6781	LOYRAU_FSR	Cu2C36Cl2H36N4S4	3.12265	5.22637	2.10372	0.161582	2.2653	84	CSD						FALSE	FALSE	FALSE
qmof-36f1e77	LOYREY_FSR	Cu2Br2C36H36N4S4	3.20356	5.30093	2.09738	0.079533	2.17691	84	CSD						FALSE	FALSE	FALSE
qmof-3df82ff	LUFPAE_FSR	Mn4C88H80N16O16	2.64785	5.72763	3.07978	-0.375248	2.70453	204	CSD						FALSE	FALSE	FALSE
qmof-4a2d090	LUGTOX_FSR	Ni2C28H28N16O4	3.24822	6.02516	2.77694	-0.219431	2.5575	78	CSD						FALSE	FALSE	FALSE
qmof-8b9c6cf	LULGAB_FSR	Ni2C24H16N8O4	1.62156	4.57875	2.9572	0.48955	3.44674	54	CSD						FALSE	FALSE	FALSE
qmof-55e124e	LULSES_FSR	Mn4C18H18N2O24	2.98715	5.79748	2.81033	0.66606	3.47639	66	CSD						FALSE	FALSE	FALSE
qmof-b808abd	LULVOE_FSR	NiC10H8N10S2	1.96554	5.02296	3.05741	0.731301	3.78871	31	CSD						FALSE	FALSE	FALSE
qmof-04a422b	LUMSIX_FSR	Cu2C56H56I2N4P2	2.65202	5.13644	2.48442	-0.791285	1.69314	122	CSD						FALSE	FALSE	FALSE
qmof-2cc3702	LUSGUC_FSR	Mn2C26H18N2O10	2.28899	4.4832	2.19421	0.369104	2.56332	58	CSD						FALSE	FALSE	FALSE
qmof-8636073	LUTKES_FSR	Ni2C40F8H36N8O8	2.01201	6.06684	4.05483	-1.01059	3.04423	102	CSD						FALSE	FALSE	FALSE
qmof-c96d53b	LUXRUT_FSR	Co2C72H56N8O8	2.28286	5.24247	2.95961	-0.454217	2.50539	146	CSD						FALSE	FALSE	FALSE
qmof-692f848	MABDIF_FSR	Cu2La2C32H28N4O26	3.50408	7.5116	4.00752	-1.24994	2.75758	94	CSD						FALSE	FALSE	FALSE
qmof-83e4c15	MABDOL_FSR	Cu2Pr2C32H28N4O26	3.65152	7.60109	3.94957	-1.50438	2.4452	94	CSD						FALSE	FALSE	FALSE
qmof-d35757d	MABDUR_FSR	Cu2Nd2C32H28N4O26	3.64632	7.59356	3.94725	-1.49246	2.45478	94	CSD						FALSE	FALSE	FALSE
qmof-5bd1c51	MABFAZ_FSR	Cu2Sm2C32H28N4O26	3.61505	7.55631	3.94126	-1.48195	2.45931	94	CSD						FALSE	FALSE	FALSE
qmof-7563546	MADPOY_FSR	NiC16H20N4O8	3.13668	6.36505	3.22838	-0.598627	2.62975	49	CSD						FALSE	FALSE	FALSE
qmof-e8e772c	MADQUF_FSR	Cu2C44H28N8O8	4.02071	7.5007	3.47999	-1.32235	2.15763	90	CSD						FALSE	FALSE	FALSE
qmof-cb5f8d9	MAFBAX_FSR	Cr4Ni2C24H32N8O14	3.50026	6.32225	2.82198	-0.240317	2.58167	84	CSD						FALSE	FALSE	FALSE
qmof-2657d57	MAFVUM_FSR	CuNiC12H12N8	3.32539	7.21753	3.89214	-1.37018	2.52196	34	CSD						FALSE	FALSE	FALSE
qmof-13f5324	MAHTUL_FSR	AgC12ClH8N2	2.80271	5.37924	2.57652	0.699628	3.27615	24	CSD						FALSE	FALSE	FALSE
qmof-02650f9	MALQUN_FSR	Pb2C22H12I4N4O2	3.39408	5.75722	2.36313	0.482676	2.84581	46	CSD						TRUE	TRUE	TRUE
qmof-7cb4137	MAPCOW_FSR	Cu4C28Cl4H28N4O4	2.99563	5.46585	2.47021	0.567408	3.03762	72	CSD						FALSE	FALSE	FALSE
qmof-a7de9ff	MAQJOD_FSR	Cu2C44H48N4O8	3.07783	6.30993	3.2321	-1.80112	1.43098	106	CSD						FALSE	FALSE	FALSE
qmof-9ac831b	MAQZUB01_FSR	Co4C24H32O16	2.82599	6.92988	4.10389	-1.15685	2.94703	76	CSD						FALSE	FALSE	FALSE
qmof-2d64b34	MARHEU_FSR	Ag8C28H28N12O18	3.23857	5.81617	2.5776	0.418978	2.99658	94	CSD						FALSE	FALSE	FALSE
qmof-755604a	MARHUI_FSR	Cu4C24H24I4N8O4	2.78848	5.2472	2.45872	0.97701	3.43573	68	CSD						FALSE	FALSE	FALSE
qmof-fe6f735	MARMEZ_FSR	Co2C58H64N8O12	1.77456	5.90377	4.12921	-1.12849	3.00072	144	CSD						FALSE	FALSE	FALSE
qmof-2fe9d9b	MARNIE_FSR	Co4C72H44N8O16	3.27603	6.70765	3.43162	-1.35044	2.08117	144	CSD						FALSE	FALSE	FALSE
qmof-97fc651	MASMEY02_FSR	Cu8C48H32N16	2.79238	5.3071	2.51472	-0.023664	2.49105	104	CSD						FALSE	FALSE	FALSE
qmof-f04954c	MATPUV_FSR	Co4Tb4C96Cl4H80N16O48	3.56268	6.51124	2.94856	-2.67967	0.268892	252	CSD						FALSE	FALSE	FALSE
qmof-5ed2725	MATVAF_FSR	Zn4C96H48N8O24	4.11907	6.16566	2.0466	-3.37086	-1.32426	180	CSD						FALSE	FALSE	FALSE
qmof-b430899	MATVEJ_FSR	Zn4C104H56N8O24	4.17973	6.2277	2.04797	-3.9356	-1.88763	196	CSD						FALSE	FALSE	FALSE
qmof-561ba01	MAYFOH01_FSR	Fe4C4H12O28P4	5.03636	8.45991	3.42356	-1.85916	1.5644	52	CSD						FALSE	FALSE	FALSE
qmof-943fcb0	MAYPUA_FSR	Cu2C12H16N20O24	4.04885	7.67541	3.62656	-1.24063	2.38593	74	CSD						FALSE	FALSE	FALSE
qmof-ce1173f	MEFSEY_FSR	Cu4C88H88N8O20S4	2.83812	6.57279	3.73467	-1.41806	2.31661	212	CSD						FALSE	FALSE	FALSE
qmof-8e2d290	MEHFOX_FSR	CuPtC18H18N6O2	3.37183	7.53122	4.15939	-1.89305	2.26634	46	CSD						FALSE	FALSE	FALSE
qmof-6d04fee	MEHPAQ_FSR	Cu4C20H36N4O20	2.94095	6.98396	4.04301	-1.5967	2.44631	84	CSD						FALSE	FALSE	FALSE
qmof-49b3901	MEJCEJ_FSR	Rh4C32H32N4O16	3.35746	5.82162	2.46416	-1.40275	1.06141	88	CSD						TRUE	TRUE	TRUE
qmof-6b45ff6	MEKJEU_FSR	Cu2C32H32N4O8	2.32656	6.34658	4.02002	-0.672145	3.34787	78	CSD						FALSE	FALSE	FALSE
qmof-3a22435	MEKPOI_FSR	Cu4C18H24N16O6	2.73069	6.571	3.84031	-1.05419	2.78612	68	CSD						FALSE	FALSE	FALSE
qmof-c0a33f9	MELNIA_FSR	Cu2C36H34N4O14	2.9882	6.76181	3.77361	-1.17123	2.60238	90	CSD						FALSE	FALSE	FALSE
qmof-725dfa2	MEMYOS_FSR	Cu4C68H88N16O16	2.15464	5.71096	3.55632	-1.01366	2.54265	192	CSD						FALSE	FALSE	FALSE
qmof-56e3289	MEPGIY_FSR	Cd2CuC26Cl2H20N4O14	3.68603	7.7575	4.07148	-1.34147	2.73	69	CSD						FALSE	FALSE	FALSE
qmof-bde105e	MEPWUC_FSR	Cu2C28H28N2O14	2.92548	6.12317	3.1977	-0.973752	2.22395	74	CSD						FALSE	FALSE	FALSE
qmof-2f0e858	MEQTIO_FSR	Cu2C48H36N8O12	2.81272	6.16895	3.35623	-1.34263	2.0136	106	CSD						FALSE	FALSE	FALSE
qmof-5e0ed29	MESHIB_FSR	Ni2C52H38N8O8S4	3.37757	5.50971	2.13214	0.044314	2.17645	112	CSD						FALSE	FALSE	FALSE
qmof-faf4b45	MESZEQ_FSR	Cu2Hg2C44H28I4N8O8	3.12576	6.48869	3.36292	-0.680854	2.68207	96	CSD						FALSE	FALSE	FALSE
qmof-9f661a9	METMUT_FSR	Ni2C40H32N12O12	3.72782	6.92626	3.19844	-2.54972	0.648716	98	CSD						FALSE	FALSE	FALSE
qmof-3a8aeef	METPIK_FSR	Co2C40H32N12O12	3.55473	6.77872	3.22399	-2.39209	0.831905	98	CSD						FALSE	FALSE	FALSE
qmof-9e4d3cd	METZEQ_FSR	Cu2C16Cl4H40O24S8	3.40834	7.04534	3.637	-0.597626	3.03937	94	CSD						FALSE	FALSE	FALSE
qmof-1deaa9a	MEWFEC_FSR	Cu2C44H28N2O18	2.83132	6.4755	3.64418	-1.18123	2.46295	94	CSD						FALSE	FALSE	FALSE
qmof-e6d5869	MEXHUU_FSR	Cu2C36H32N8O14S2	3.46862	7.14513	3.67651	-1.96181	1.71469	94	CSD						FALSE	FALSE	FALSE
qmof-12fff70	MEXTIV_FSR	CuC46F6H36N8O6S2	3.36968	6.75385	3.38417	-0.896282	2.48788	105	CSD						FALSE	FALSE	FALSE
qmof-0af7444	MEYLUZ_FSR	Cu4C36H32N8O8	3.86335	6.02363	2.16028	-0.360857	1.79942	88	CSD						FALSE	FALSE	FALSE
qmof-c330eaf	MEZGAZ_FSR	Ni2C36H56N8O8	1.61726	4.69384	3.07658	-0.176987	2.8996	110	CSD						FALSE	FALSE	FALSE
qmof-ccee605	MEZSAL_FSR	Co4C20H24O16	2.87596	6.99109	4.11514	-0.944447	3.17069	64	CSD						FALSE	FALSE	FALSE
qmof-683ccdc	MGPHCU_FSR	Cu2Mg2C32H32O24	3.34695	6.8567	3.50975	-1.28874	2.22102	92	CSD						FALSE	FALSE	FALSE
qmof-4c4d6c3	MICDEJ_FSR	Mn6C96H80N4O40	2.44884	5.70571	3.25687	-0.760274	2.4966	226	CSD						FALSE	FALSE	FALSE
qmof-4124b8d	MIFVII_FSR	CoC24H28N2O6	1.89511	6.1434	4.24829	-1.08192	3.16636	61	CSD						FALSE	FALSE	FALSE
qmof-b0bde78	MIHLOG_FSR	Cu2C44H36N8O12	2.55134	6.47011	3.91877	-1.44732	2.47145	102	CSD						FALSE	FALSE	FALSE
qmof-66dc50d	MIJLEX_FSR	Cu4C16H24N8O12S2	2.90538	5.36328	2.4579	0.453003	2.9109	66	CSD						FALSE	FALSE	FALSE
qmof-275ec22	MIJMAU_FSR	Ni4W2C80H144N32	1.24101	4.71446	3.47345	-1.05121	2.42224	262	CSD						FALSE	FALSE	FALSE
qmof-1013282	MIJSII_FSR	Cu8C72H64O40	3.09485	6.68226	3.58741	-2.76434	0.823067	184	CSD						FALSE	FALSE	FALSE
qmof-a98810e	MIMDAP_FSR	Mo8Ni2C30H40N30O26	3.29664	6.5494	3.25276	-0.843866	2.4089	136	CSD						FALSE	FALSE	FALSE
qmof-98dce4c	MINJOK_FSR	Mn2C64H56N4O12S6	2.99572	5.37759	2.38187	0.215654	2.59752	144	CSD						FALSE	FALSE	FALSE
qmof-1f08cd7	MINNEF_FSR	Ni8C72H48O32	2.65334	5.80052	3.14717	-0.91357	2.2336	160	CSD						FALSE	FALSE	FALSE
qmof-ccf41ca	MISQUB_FSR	Cu2C12H16N4O14	3.92679	7.76094	3.83414	-1.65289	2.18126	48	CSD						FALSE	FALSE	FALSE
qmof-59aa942	MIVDAW_FSR	Cu4C36H36I4N8S4	2.9584	5.30552	2.34713	1.0993	3.44643	92	CSD						FALSE	FALSE	FALSE
qmof-2c16169	MIWJOT_FSR	Cu4C72H48I4N8O16	3.00894	5.0693	2.06036	-0.252866	1.80749	152	CSD						FALSE	FALSE	FALSE
qmof-94898ae	MIXRAN01_FSR	Cu2C40H28N12O8	2.4527	6.27369	3.82099	-0.901334	2.91966	90	CSD						FALSE	FALSE	FALSE
qmof-e534471	MIZYAV_FSR	La2C18Cl6H12O18	4.59149	6.4527	1.86121	0.377666	2.23887	56	CSD						FALSE	FALSE	FALSE
qmof-1a42fad	MIZZEA_FSR	Y2C18Cl6H12O18	4.60141	6.62737	2.02595	-0.851952	1.174	56	CSD						FALSE	FALSE	FALSE
qmof-363e93c	MODWUX_FSR	Ni6C16H28O28	2.66379	6.27317	3.60938	-1.16163	2.44775	78	CSD						FALSE	FALSE	FALSE
qmof-4b38c0b	MODZAJ_FSR	Cu2Br4C48H28N4O8	2.61491	6.51915	3.90424	-1.04563	2.85861	94	CSD						FALSE	FALSE	FALSE
qmof-d383524	MOF-5_cooh_2_2638_1	Zn8C36H36N12O32	3.88525	6.83055	2.9453	-4.21225	-1.26695	124	Haranczyk_MOF5						FALSE	FALSE	FALSE
qmof-bc2bf53	mof74_101_1_all_conf_413_0	Mg6C72H36N12O18	3.80746	5.8673	2.05984	-4.50985	-2.45001	144	Haranczyk_MOF74						FALSE	FALSE	FALSE
qmof-97f4720	mof74_229_all_conf_6704_0	Mg6C108H54O30	3.80142	5.98783	2.18641	-4.79692	-2.61051	198	Haranczyk_MOF74						FALSE	FALSE	FALSE
qmof-966fade	mof74_24_all_conf_9_0	Mg6C114H42N6O30	4.14115	6.08425	1.9431	-4.89124	-2.94814	198	Haranczyk_MOF74						FALSE	FALSE	FALSE
qmof-38eac89	mof74_261_1_all_conf_203_0	Mg6C102H54N18O18	4.05954	5.67656	1.61702	-4.5342	-2.91718	198	Haranczyk_MOF74						FALSE	FALSE	FALSE
qmof-87b3bdd	mof74_261_2_all_conf_272_0	Mg6C78H42N18O18	4.03117	6.28131	2.25014	-5.27332	-3.02318	162	Haranczyk_MOF74						FALSE	FALSE	FALSE
qmof-2cf4df0	MOFBEQ_FSR	Ni2C72H64N4O16	2.74829	6.0712	3.32291	-0.716704	2.60621	158	CSD						FALSE	FALSE	FALSE
qmof-082c84f	MOHFIA_FSR	Mo2C14H8N2O8	4.41748	6.24448	1.82699	0.263585	2.09058	34	CSD						FALSE	FALSE	FALSE
qmof-9883216	MOHLOL01_FSR	Ni2C36H36N8O10	2.44396	6.27511	3.83116	-0.844241	2.98692	92	CSD						FALSE	FALSE	FALSE
qmof-07fbe14	MOLKAA_FSR	Cu2Ni2C32H56N16	2.65272	6.61353	3.96082	-1.64502	2.31579	108	CSD						FALSE	FALSE	FALSE
qmof-68010e6	MOLVOZ01_FSR	Cu6C24H16I6N4	2.85637	4.78083	1.92447	2.04507	3.96954	56	CSD						FALSE	FALSE	FALSE
qmof-bbb6f1d	MOPLIO_FSR	Cu2C38H34N10O12	2.74732	6.27192	3.5246	-1.02938	2.49522	96	CSD						FALSE	FALSE	FALSE
qmof-f4e3be2	MOPMUB_FSR	NiC10H22O10P2	1.81802	6.0131	4.19508	-0.25765	3.93743	45	CSD						FALSE	FALSE	FALSE
qmof-476a5b8	MOTXUO_FSR	Cu2C32H24N16	2.71535	6.61256	3.89721	-1.59427	2.30294	74	CSD						FALSE	FALSE	FALSE
qmof-07c91b5	MOVGAH_FSR	Cu4Sr2C32H24O26	3.70507	6.83569	3.13063	-0.751871	2.37875	88	CSD						FALSE	FALSE	FALSE
qmof-0c64ba3	MOVVOK_FSR	Mn4C36H32O20	2.32646	5.61264	3.28618	-0.465064	2.82111	92	CSD						FALSE	FALSE	FALSE
qmof-08a8079	MOXNUJ_FSR	Cu4C66H88N8O32	2.68434	6.77715	4.09281	-2.40179	1.69102	198	CSD						FALSE	FALSE	FALSE
qmof-6581895	MUCFEX_FSR	Cu2C32H44N4O16S4	4.11194	7.78816	3.67622	-1.29673	2.37949	102	CSD						FALSE	FALSE	FALSE
qmof-c45f4aa	MUFKEE_FSR	Cu4C16H40N40	2.30132	6.38854	4.08721	-0.690003	3.39721	100	CSD						FALSE	FALSE	FALSE
qmof-12c7df0	MUFTOX_FSR	Zn4C96H88N8S8	3.02508	5.26861	2.24353	-1.12174	1.12179	204	CSD						FALSE	FALSE	FALSE
qmof-3669068	MUFVUF_FSR	Cu4C80H64N24O16	2.33138	6.48374	4.15236	-1.54417	2.60819	188	CSD						FALSE	FALSE	FALSE
qmof-e03dbd5	MUHLAC_FSR	FeC24H20N10O2	3.17211	5.71942	2.54731	-0.22258	2.32473	57	CSD						FALSE	FALSE	FALSE
qmof-9f0b3fe	MUHQEL_FSR	Cu2Br2C12H16N4	2.58311	4.83437	2.25126	0.201845	2.4531	36	CSD						FALSE	FALSE	FALSE
qmof-d8224dc	MUJKAF_FSR	Cd4C80H60N28O16	2.95236	4.97131	2.01895	-2.22839	-0.209443	188	CSD						FALSE	FALSE	FALSE
qmof-214ca92	MUKRIU_FSR	Ag4C48H24N44O20	3.81165	6.05379	2.24215	-0.494776	1.74737	140	CSD						FALSE	FALSE	FALSE
qmof-7cb301f	MULJIO_FSR	Co4C120H100N16O24	2.71368	6.24713	3.53345	-0.840754	2.69269	264	CSD						FALSE	FALSE	FALSE
qmof-60450dd	MUNPUH_FSR	Co2C56H44N8O8	2.56798	6.05671	3.48872	-0.937079	2.55165	118	CSD						FALSE	FALSE	FALSE
qmof-d44e9a3	MUPKOY_FSR	Cu8C48H40I12N24	2.41109	4.52996	2.11887	0.987049	3.10592	132	CSD						FALSE	FALSE	FALSE
qmof-4d203e9	MUPKUE_FSR	Cu12C48H40I12N24	3.31928	5.72353	2.40426	1.30466	3.70892	136	CSD						TRUE	TRUE	TRUE
qmof-44c00af	MUPLAL_FSR	Cu8Br8C48H40N24	3.41802	5.61659	2.19857	0.688125	2.88669	128	CSD						FALSE	FALSE	FALSE
qmof-b70466d	MUPLUF_FSR	Cu2Br2C24H20N12	2.16813	4.67515	2.50702	0.763923	3.27094	60	CSD						FALSE	FALSE	FALSE
qmof-b71cc86	MUPMEQ01_FSR	Cu6C24H20I6N12	3.022	5.51656	2.49457	1.59831	4.09288	68	CSD						FALSE	FALSE	FALSE
qmof-439555b	MUQCEH_FSR	Cu2C28F8H16N2O10	3.41165	7.42021	4.00856	-1.20258	2.80598	66	CSD						FALSE	FALSE	FALSE
qmof-ad7387b	MUQVOL01_FSR	Li4C28H20O12	4.29835	6.18387	1.88552	-0.213049	1.67247	64	CSD						FALSE	FALSE	FALSE
qmof-6fcc83e	MUQWAY01_FSR	Li8C56H40O24	4.08313	5.84286	1.75973	0.205995	1.96572	128	CSD						FALSE	FALSE	FALSE
qmof-d513970	MUQWEB_FSR	CuB2C4H18N22	2.83396	6.78904	3.95508	-0.69665	3.25843	47	CSD						FALSE	FALSE	FALSE
qmof-7953340	MUQWIG_FSR	Li4C56H36O20	3.78671	5.518	1.73129	0.511051	2.24234	116	CSD						FALSE	FALSE	FALSE
qmof-094542b	MUQWUS_FSR	Li4C56H32N4O24	4.12879	6.11432	1.98552	-0.256769	1.72876	120	CSD						FALSE	FALSE	FALSE
qmof-c906ab4	MUSGEM_FSR	Cu2Br2C24H16N4	2.46351	4.8041	2.34058	0.985452	3.32604	48	CSD						FALSE	FALSE	FALSE
qmof-41bc44e	MUSGUC_FSR	Cu4C52H32N12S4	2.87774	5.34198	2.46424	0.803272	3.26752	104	CSD						FALSE	FALSE	FALSE
qmof-e6be400	MUSHAJ_FSR	Cu2Br2C24H16N4	2.83316	5.02291	2.18974	1.14343	3.33317	48	CSD						FALSE	FALSE	FALSE
qmof-e7f4b5f	MUSHEN_FSR	Cu4C48H32I4N8	2.96499	5.04738	2.08239	1.23145	3.31385	96	CSD						FALSE	FALSE	FALSE
qmof-e6bb80c	MUSQIC_FSR	Ni4C106H136N24O16	2.24463	5.935	3.69037	-1.50835	2.18202	286	CSD						FALSE	FALSE	FALSE
qmof-284c1aa	MUTBUA_FSR	Cu2C32F6H28I2N10O2	2.51315	5.12655	2.6134	-0.123868	2.48953	82	CSD						FALSE	FALSE	FALSE
qmof-d105fa0	MUTREA_FSR	Co2C12H12N2O6P2	2.41917	6.5729	4.15373	0.005648	4.15938	36	CSD						FALSE	FALSE	FALSE
qmof-c775fd7	MUZTOS_FSR	Co2C28H28N8O16	1.41675	6.43693	5.02018	-0.486898	4.53329	82	CSD						FALSE	FALSE	FALSE
qmof-9940a4e	NABMUZ_FSR	Cu2C32H32N4O8	2.83286	6.39891	3.56605	-1.41219	2.15386	78	CSD						FALSE	FALSE	FALSE
qmof-60df73a	NACDOL_FSR	Ni2C48H40N4O12	2.30302	5.99622	3.6932	-0.517387	3.17581	106	CSD						FALSE	FALSE	FALSE
qmof-bff6e3a	NACXUM_FSR	Mn3C8H16N6O16	3.09884	6.45735	3.35851	0.111921	3.47043	49	CSD						FALSE	FALSE	FALSE
qmof-d10ccb2	NAFGOR01_FSR	Co8C48H48N32	2.47876	6.0439	3.56513	-2.38464	1.18049	136	CSD						FALSE	FALSE	FALSE
qmof-ab3cb93	NAFSOF_FSR	Cu4C80H52O20	3.00869	6.43519	3.4265	-4.84929	-1.42279	156	CSD						FALSE	FALSE	FALSE
qmof-b1020c2	NAFWUP_FSR	Cu2C32H32N20O8	1.6401	5.75196	4.11186	-2.46079	1.65107	94	CSD						FALSE	FALSE	FALSE
qmof-dbbcff4	NAFYUQ_FSR	Cu3C72H48N12O18	3.1962	6.10871	2.91251	-1.51274	1.39977	153	CSD						FALSE	FALSE	FALSE
qmof-babba36	NAPHCU01_FSR	Cu2Na4C32H24O20	3.5006	7.23765	3.73705	-1.51254	2.22451	82	CSD						FALSE	FALSE	FALSE
qmof-b13adc9	NAPHIY_FSR	CoC22H24N2O6	2.53697	6.18299	3.64602	-0.331563	3.31446	55	CSD						FALSE	FALSE	FALSE
qmof-a915127	NAQFIV_FSR	Ag4U2C68H36N8O20	3.42196	6.12402	2.70206	0.421287	3.12335	138	CSD						FALSE	FALSE	FALSE
qmof-18306a5	NARSUW_FSR	Ni2C60H44N12O8	2.57273	5.95915	3.38643	-1.03992	2.34651	126	CSD						FALSE	FALSE	FALSE
qmof-bc76ca2	NATKAX_FSR	Cu2C80F12H48N8Si2	3.33914	6.43211	3.09297	-3.82688	-0.733907	152	CSD						FALSE	FALSE	FALSE
qmof-b99f6b2	NAVLOO_FSR	Cu2C26H24N4O12P4	3.29958	7.00784	3.70826	-0.878702	2.82956	72	CSD						FALSE	FALSE	FALSE
qmof-757860d	NAWWUG_FSR	Ni6C60H44N12O28	3.42989	6.64191	3.21203	-2.89345	0.318577	150	CSD						FALSE	FALSE	FALSE
qmof-fa0c5a7	NAXTAI_FSR	Mn4C48H24O16	2.87772	6.0721	3.19438	-0.129933	3.06444	92	CSD						FALSE	FALSE	FALSE
qmof-ad44d4e	NAYHUQ_FSR	Ni2C20H16N16	3.01631	5.57257	2.55626	0.210711	2.76697	54	CSD						FALSE	FALSE	FALSE
qmof-3dab219	NAZTEQ_FSR	Cu2C48H40I2N2P2	3.09299	5.18049	2.08751	0.318007	2.40551	96	CSD						FALSE	FALSE	FALSE
qmof-306fb3e	NAZWET_FSR	Zn2C30H24N4O8	3.45127	5.86272	2.41145	-0.809056	1.60239	68	CSD						TRUE	TRUE	FALSE
qmof-1de625c	NECDUV_FSR	Mo4C52F24H36N4O16S4	3.57177	5.48452	1.91275	-0.787245	1.12551	140	CSD						FALSE	FALSE	FALSE
qmof-3f9372d	NECFAD_FSR	Mo4C52F24H36N4O16S4	3.23557	5.13563	1.90005	0.558264	2.45831	140	CSD						FALSE	FALSE	FALSE
qmof-591956d	NECFIL_FSR	Rh4C52F24H36N4O16S4	3.42278	5.40033	1.97755	-0.646277	1.33127	140	CSD						FALSE	FALSE	FALSE
qmof-ea963b6	NEDHIN_FSR	Cu4C52H52N8O16	3.36658	5.85011	2.48354	-0.100522	2.38301	132	CSD						TRUE	TRUE	TRUE
qmof-8e4eda8	NEDKAL_FSR	Cu16Tb4C84H76I16N16O28	2.9871	5.34351	2.35641	0.391015	2.74743	240	CSD						FALSE	FALSE	FALSE
qmof-56f4308	NEGKIW_FSR	Zn2C40H26N14O8	3.33297	5.75386	2.4209	-2.08224	0.338657	90	CSD						TRUE	TRUE	TRUE
qmof-8f2f198	NELKAQ01_FSR	Cu2C28H24N6O12	2.88532	6.33894	3.45362	-0.709449	2.74417	72	CSD						FALSE	FALSE	FALSE
qmof-c098fd3	NELMIA01_FSR	Cu2C20H16N20	2.65662	6.23598	3.57936	-1.05182	2.52754	58	CSD						FALSE	FALSE	FALSE
qmof-00e611b	NEMZIQ_FSR	Ag4C24H22N10O14	3.31619	6.0579	2.74171	-0.102835	2.63888	74	CSD						FALSE	FALSE	FALSE
qmof-6005a80	NEMZOW_FSR	Ag8C48H40N16O16	3.00089	5.75149	2.7506	0.313001	3.0636	128	CSD						FALSE	FALSE	FALSE
qmof-53df3c7	NENDAL_FSR	Ni2C44H44N8O12	1.86144	6.06462	4.20319	-0.867782	3.3354	110	CSD						FALSE	FALSE	FALSE
qmof-299e646	NEPNEB_FSR	Co2C42H28N4O14	2.85956	5.79159	2.93203	-0.27396	2.65807	90	CSD						FALSE	FALSE	FALSE
qmof-425232b	NEPRUW_FSR	Pb2C22H24I4N8	1.265	3.3943	2.1293	0.205886	2.33519	60	CSD						FALSE	FALSE	FALSE
qmof-657a971	NERDIX_FSR	Cu2C44H38N10O6	2.92267	5.72577	2.8031	-0.272738	2.53037	100	CSD						FALSE	FALSE	FALSE
qmof-3ca5d72	NESDIY_FSR	Ag4C24F12H16O12S24	3.67297	5.75793	2.08496	1.59267	3.67762	92	CSD						TRUE	FALSE	FALSE
qmof-0782391	NESPAC_FSR	Cu4Br4C20H20N4	3.05032	5.14863	2.09831	0.824748	2.92305	52	CSD						FALSE	FALSE	FALSE
qmof-902b24f	NEWTOZ_FSR	CuC22H20N4O6	3.20769	6.75379	3.5461	-1.2523	2.29379	53	CSD						FALSE	FALSE	FALSE
qmof-d12960f	NEZRUG_FSR	Cu4C64H40N16O16	2.93392	6.58265	3.64873	-1.71502	1.93371	140	CSD						FALSE	FALSE	FALSE
qmof-d390079	NICJOA_FSR	Ba6Cu6C60H84O54	2.78699	6.76283	3.97583	-2.12898	1.84685	210	CSD						FALSE	FALSE	FALSE
qmof-0b4817e	NIDRAW_FSR	Cu6C20H14N16	3.20945	5.14908	1.93963	0.934061	2.87369	56	CSD						FALSE	FALSE	FALSE
qmof-e68f2b2	NIFORM01_FSR	Ni4C8H24O24	2.01926	6.61877	4.59951	-1.22706	3.37245	60	CSD						FALSE	FALSE	FALSE
qmof-93da51e	NIGNUP_FSR	Er4C48Cl12H36N12O36	4.02031	5.97288	1.95257	-1.45814	0.494432	148	CSD						FALSE	FALSE	FALSE
qmof-0df517f	NIHFEP_FSR	Cu4C52H36N8O4	3.58861	5.71029	2.12168	-0.137812	1.98387	104	CSD						TRUE	TRUE	FALSE
qmof-9df80d1	NIJSAC_FSR	Cu4C64H52N28O32	3.82075	7.48293	3.66218	-1.80418	1.858	180	CSD						FALSE	FALSE	FALSE
qmof-098256e	NILDOD_FSR	Co2C52H40N4O12S2	2.52752	5.49993	2.97241	-0.348747	2.62366	112	CSD						FALSE	FALSE	FALSE
qmof-90df4ad	NINHIE_FSR	CdCu2C46H44N4O8	2.05612	5.29762	3.24149	-1.21409	2.0274	105	CSD						FALSE	FALSE	FALSE
qmof-fe66204	NIPWEP_FSR	Ni2C36H56N4O8P4S10	2.08117	5.06524	2.98407	0.276518	3.26059	120	CSD						FALSE	FALSE	FALSE
qmof-3e96a80	NISZEU_FSR	Co2Mo6C20H16N4O20	3.63906	6.17315	2.53409	0.852954	3.38704	68	CSD						FALSE	FALSE	FALSE
qmof-172319f	NIXPOC_FSR	Cu4C48H32N20	3.14282	5.46279	2.31997	1.00324	3.32321	104	CSD						FALSE	FALSE	FALSE
qmof-190cb3e	NOBRUT01_FSR	Fe2Ni2C44H32N16	2.84255	5.45519	2.61264	0.14439	2.75703	96	CSD						FALSE	FALSE	FALSE
qmof-9ea13da	NOBWIM_FSR	Fe2Pt2C44H32N16	2.81548	5.43546	2.61999	0.139413	2.7594	96	CSD						FALSE	FALSE	FALSE
qmof-7bc9775	NOCBOW_FSR	Cu4C16H24N12O8	3.21699	7.0037	3.78671	-1.23768	2.54903	64	CSD						FALSE	FALSE	FALSE
qmof-13463bb	NOCDOY_FSR	Ni4C30Cl6H62N12	1.69205	5.53347	3.84142	-0.817869	3.02355	114	CSD						FALSE	FALSE	FALSE
qmof-b33b31e	NOCJEV_FSR	Cu2C30F6H28N4O8S2	2.99191	5.5248	2.53288	0.355803	2.88869	80	CSD						FALSE	FALSE	FALSE
qmof-b517439	NODLAV_FSR	NiC8H10N4O6S2	3.24724	6.19189	2.94464	0.766553	3.7112	31	CSD						FALSE	FALSE	FALSE
qmof-d270b21	NODYOW_FSR	Ni3V6C12H24N24O18	3.38618	6.16029	2.7741	-0.351562	2.42254	87	CSD						FALSE	FALSE	FALSE
qmof-a1d95f7	NOFQIK_FSR	Cu2C20H28I6N8	3.41053	5.31908	1.90855	0.652784	2.56134	64	CSD						FALSE	FALSE	FALSE
qmof-0e0cf73	NOFQUW_FSR	Cu2C42H42N6O18	3.58394	6.99637	3.41242	-1.68139	1.73104	110	CSD						FALSE	FALSE	FALSE
qmof-5bcace3	NOMGAZ_FSR	Cu2C16H24N4O16	3.31282	7.38575	4.07294	-1.18286	2.89007	62	CSD						FALSE	FALSE	FALSE
qmof-3bda7fc	NOPCUR_FSR	Cu2C20Cl2H32N4O4	3.19902	6.59875	3.39972	-1.40394	1.99578	64	CSD						FALSE	FALSE	FALSE
qmof-4125488	NUFTAJ_FSR	Cu4C12H8N8S4	2.97011	5.08888	2.11877	1.26456	3.38333	36	CSD						FALSE	FALSE	FALSE
qmof-5dfc500	NUGBUO_FSR	Ni3C72H144N18O12	0.595082	4.42616	3.83108	-1.35507	2.47601	249	CSD						FALSE	FALSE	FALSE
qmof-439bd40	NUHTER01_FSR	Fe2Pt2C40H28N20	2.33621	5.59728	3.26107	-0.334903	2.92616	92	CSD						FALSE	FALSE	FALSE
qmof-99ecd48	NUNGEK_FSR	Cu6Gd2C48H42O42	3.41394	6.43699	3.02306	0.048782	3.07184	140	CSD						FALSE	FALSE	FALSE
qmof-acc11bc	NUSZAD_FSR	Ni2C46H30N8O12	3.37509	6.37532	3.00024	-0.691287	2.30895	98	CSD						FALSE	FALSE	FALSE
qmof-26888fa	NUVXOS_FSR	Cu4C8Cl2H6N4S2	2.72097	4.88756	2.16659	2.48788	4.65447	26	CSD						FALSE	FALSE	FALSE
qmof-d73b859	NUVZEK_FSR	Cu4C72H76N12O32	3.09784	7.12777	4.02993	-1.5649	2.46503	196	CSD						FALSE	FALSE	FALSE
qmof-0fbfb10	NUXYOW_FSR	NiC36H34N2O6	2.80697	5.58439	2.77742	-0.319944	2.45747	79	CSD						FALSE	FALSE	FALSE
qmof-ea27d90	NUZJEZ01_FSR	CoC24Cl2H20N8O4	2.87713	5.71136	2.83423	-0.375473	2.45876	59	CSD						FALSE	FALSE	FALSE
qmof-bd3dde7	NUZWIQ_FSR	Cu4C40H28N12O16	2.94926	6.95124	4.00198	-1.15861	2.84336	100	CSD						FALSE	FALSE	FALSE
qmof-2d80bfd	NUZZEN_FSR	CuK2C35H47N7O9	1.63314	4.88849	3.25535	-0.3766	2.87875	101	CSD						FALSE	FALSE	FALSE
qmof-69add22	OBAFEF_FSR	Cu16Tb4C84H76I16N16O28	3.09654	5.47639	2.37985	0.198286	2.57813	240	CSD						FALSE	FALSE	FALSE
qmof-6a17ede	OCEJAK01_FSR	Cd2C56H40N4O16	4.19605	6.90627	2.71022	-1.12932	1.5809	118	CSD						FALSE	FALSE	FALSE
qmof-9c5aaea	OCEQIX_FSR	Co4C20H20N8O8	2.91527	6.47884	3.56356	-0.472195	3.09137	60	CSD						FALSE	FALSE	FALSE
qmof-c389047	OCEYIH_FSR	NiC18Cl4H18N4O6	2.67899	6.77899	4.1	-1.98057	2.11943	51	CSD						FALSE	FALSE	FALSE
qmof-c8df599	OCIVAA01_FSR	FePtC28H20N16	2.8013	5.65283	2.85153	0.321664	3.17319	66	CSD						FALSE	FALSE	FALSE
qmof-caea536	OCIXON01_FSR	Cu8Mo12C16H16N8O40	4.32232	6.25887	1.93655	1.83733	3.77388	100	CSD						FALSE	FALSE	FALSE
qmof-c0331cb	ODEPOF_FSR	Fe3C66H42N36	3.13288	5.57977	2.44689	-0.919695	1.52719	147	CSD						FALSE	FALSE	FALSE
qmof-211265f	ODEPUL_FSR	Fe3C90H66N36	2.29467	4.78089	2.48622	-0.335041	2.15117	195	CSD						FALSE	FALSE	FALSE
qmof-e0dc4ed	ODEQEW_FSR	Fe3C81H42N36O30	2.97608	5.49168	2.5156	0.141666	2.65727	192	CSD						FALSE	FALSE	FALSE
qmof-b0214d8	ODIVAZ_FSR	CuC40H32N18O8	3.38519	6.43227	3.04707	-0.619782	2.42729	99	CSD						FALSE	FALSE	FALSE
qmof-4c18ced	ODIVUT_FSR	Co2C40H36N12O10	2.15965	5.99137	3.83172	-0.150747	3.68098	100	CSD						FALSE	FALSE	FALSE
qmof-12edc8c	ODOBAL_FSR	Cu2C32H24N4O8	2.82902	6.4768	3.64778	-1.53874	2.10904	70	CSD						FALSE	FALSE	FALSE
qmof-92f0814	ODOJEZ_FSR	CuC50H34N6O6	2.3797	5.50784	3.12814	-0.574649	2.55349	97	CSD						FALSE	FALSE	FALSE
qmof-c3d8aec	ODONUR_FSR	Ni4C16H8N8O20S4	3.51505	7.06416	3.54911	0.156141	3.70525	60	CSD						FALSE	FALSE	FALSE
qmof-e5ef618	ODUSOX_FSR	FeC20H14N16S2	2.70818	5.59202	2.88384	0.748075	3.63191	53	CSD						FALSE	FALSE	FALSE
qmof-44c1049	OFACAB_FSR	Cu2C26Cl2H20N6	2.79766	5.1963	2.39864	0.236845	2.63549	56	CSD						FALSE	FALSE	FALSE
qmof-5d9fab0	OFADAC_FSR	CuC30H30N6O6	2.23653	5.71599	3.47946	-0.975652	2.5038	73	CSD						FALSE	FALSE	FALSE
qmof-9fbdc0b	OFEFAG_FSR	Cu2C32H28N4O10	2.85999	6.5405	3.68051	-1.58373	2.09679	76	CSD						FALSE	FALSE	FALSE
qmof-e5e12e2	OFIWEG_FSR	Cu2Ru2C24H44N20	2.75163	6.24211	3.49048	-0.999386	2.4911	92	CSD						FALSE	FALSE	FALSE
qmof-2c408e6	OFOCIY_FSR	Cu2Er2C48H32N8O16	2.83954	5.36378	2.52424	-1.56695	0.957285	108	CSD						FALSE	FALSE	FALSE
qmof-0f178f1	OFORUX_FSR	Cd2Cu2C52Cl4H44N8O4	1.86538	4.91952	3.05414	-0.495498	2.55864	116	CSD						FALSE	FALSE	FALSE
qmof-f0dfa44	OFUZUL_FSR	Cu4C8H8N12	2.10713	4.90405	2.79692	1.03576	3.83268	32	CSD						FALSE	FALSE	FALSE
qmof-59b517c	OGANAN_FSR	Ni6C12H28O32	2.40616	6.6291	4.22294	-0.396435	3.82651	78	CSD						FALSE	FALSE	FALSE
qmof-ef42d2a	OGAWEA_FSR	Cu4C24Cl4H28N12O4	2.83973	5.17143	2.3317	1.12524	3.45694	76	CSD						FALSE	FALSE	FALSE
qmof-c0bdee5	OGIQAY_FSR	Zn4C84H68N8O28	3.62178	5.62479	2.003	-0.533632	1.46937	192	CSD						FALSE	FALSE	FALSE
qmof-0e4bbc6	OGODOD_FSR	Ni2C88H64N12O12	3.27684	6.16638	2.88954	-3.00352	-0.113978	178	CSD						FALSE	FALSE	FALSE
qmof-17b62c4	OGOWAK_FSR	Ba2Cu2C20H16O16	2.95614	6.92314	3.967	-1.01626	2.95075	56	CSD						FALSE	FALSE	FALSE
qmof-70f4cf7	OGUKAE_FSR	Zn2C12H8N20S4	3.79725	6.25286	2.45561	-0.876534	1.57907	46	CSD						FALSE	FALSE	FALSE
qmof-a0e80c5	OGUXOE_FSR	Fe2C2H6O14P2	5.43359	8.5038	3.07022	-1.19996	1.87025	26	CSD						FALSE	FALSE	FALSE
qmof-4ac7df5	OHAYON_FSR	CuHg3C34Cl2H38N8O10	2.364	6.19489	3.83088	-1.15149	2.67939	96	CSD						FALSE	FALSE	FALSE
qmof-d429569	OHIRED02_FSR	Cu2C36F20H8N4O8	4.37348	7.82368	3.4502	-1.29801	2.15219	78	CSD						FALSE	FALSE	FALSE
qmof-f9e6ec3	OHIRUS_FSR	Mn2C36H28N4O8	2.03025	5.2372	3.20694	0.096734	3.30368	78	CSD						FALSE	FALSE	FALSE
qmof-d83a3a6	OJABUY_FSR	Cu2C52Cl4H40N4O10	3.13735	6.48356	3.34621	-1.33981	2.0064	112	CSD						FALSE	FALSE	FALSE
qmof-c988bec	OKELEX_FSR	MnC22H12O8	3.04431	5.96659	2.92228	0.184807	3.10708	43	CSD						FALSE	FALSE	FALSE
qmof-1b44fef	OKILEA_FSR	Mn9C66H66N12O42	2.31332	5.55073	3.23741	-1.08527	2.15214	195	CSD						FALSE	FALSE	FALSE
qmof-1580a8b	OKIYEO_FSR	CoC26H20N2O10	3.31358	6.44797	3.13439	-0.654891	2.4795	59	CSD						FALSE	FALSE	FALSE
qmof-2e02fed	OKOSOY_FSR	Co2C64H44N8O10	2.89216	6.30955	3.41739	-0.943473	2.47392	128	CSD						FALSE	FALSE	FALSE
qmof-c9f20d8	OLOQOV_FSR	Cu2C28Cl2H24N4O8	3.24	5.57072	2.33072	0.391853	2.72257	68	CSD						FALSE	FALSE	FALSE
qmof-2593f7a	OLUCAZ_FSR	Cu4C72H80N16O20	2.09949	6.39172	4.29222	-2.34837	1.94385	192	CSD						FALSE	FALSE	FALSE
qmof-9a7a515	OLUNEO_FSR	Rh2C68H64N10	2.34662	4.60738	2.26076	-0.17611	2.08465	144	CSD						FALSE	FALSE	FALSE
qmof-ad5034e	OMABEL_FSR	Cu12W6B6C132H156N54S18	3.49488	5.45434	1.95946	-1.7817	0.177766	384	CSD						FALSE	FALSE	FALSE
qmof-1a49402	OMAYOS_FSR	Cu2C40H24N6O8	3.80359	7.21924	3.41564	-1.10661	2.30903	80	CSD						FALSE	FALSE	FALSE
qmof-6777158	OMOLEJ_FSR	Cu2C34H32N8O8	2.78468	6.64396	3.85928	-2.2409	1.61838	84	CSD						FALSE	FALSE	FALSE
qmof-877d368	OMURIY_FSR	Sn8C28H12N4O20	3.55982	5.58494	2.02512	1.46882	3.49394	72	CSD						FALSE	FALSE	FALSE
qmof-a89b009	ONABAI_FSR	Mn2C82H58N14O8	1.51274	4.48512	2.97239	-0.340239	2.63215	164	CSD						FALSE	FALSE	FALSE
qmof-cd31982	ONABUB_FSR	Cu2V4C20H18N6O12	3.90592	6.85476	2.94883	-0.41938	2.52946	62	CSD						FALSE	FALSE	FALSE
qmof-b0fd440	ONAMAT_FSR	V4C24H16O16	3.40246	6.26705	2.86459	0.41254	3.27713	60	CSD						FALSE	FALSE	FALSE
qmof-1e427c5	ONAWIK01_FSR	Cu2C32Cl4H48N24	2.52818	6.34398	3.8158	-0.619729	3.19607	110	CSD						FALSE	FALSE	FALSE
qmof-b5d466b	ONIPIM_FSR	Cu4C32H32N12O16P4	3.1174	6.71718	3.59978	-0.195642	3.40414	100	CSD						FALSE	FALSE	FALSE
qmof-5c8908e	ONOVET_FSR	Fe2C20H16N12S4	3.29446	5.92255	2.62809	0.448278	3.07637	54	CSD						FALSE	FALSE	FALSE
qmof-c0a61f9	OPIZET_FSR	NiC36H42N20O6	2.91237	5.67964	2.76727	0.429505	3.19677	105	CSD						FALSE	FALSE	FALSE
qmof-16dd495	OPOJUA_FSR	CuC32H29N5O6	2.87946	6.73827	3.85881	-1.47914	2.37967	73	CSD						FALSE	FALSE	FALSE
qmof-57e2359	OQEDUK_FSR	NiC32H26N10O6	2.39398	4.54536	2.15138	0.637751	2.78913	75	CSD						FALSE	FALSE	FALSE
qmof-c49d30b	OQIMEI_FSR	Co2C36H28N24	1.22753	5.33659	4.10906	0.310023	4.41908	90	CSD						FALSE	FALSE	FALSE
qmof-2389400	OSANED_FSR	Ni2C20H16N4O8	1.96128	5.66716	3.70587	0.054729	3.7606	50	CSD						FALSE	FALSE	FALSE
qmof-a7ea515	OSEWOZ_FSR	Ag2C38F6H22N6O8	3.46548	6.11724	2.65176	-0.629547	2.02221	82	CSD						FALSE	FALSE	FALSE
qmof-067b298	OSOMIT_FSR	Zn6C60H56N18O28	3.19615	5.63316	2.43701	-0.529608	1.9074	168	CSD						FALSE	FALSE	FALSE
qmof-92f3405	OTIPOX_FSR	Co2C32H34N4O8	1.93047	5.3468	3.41633	-0.276688	3.13964	80	CSD						FALSE	FALSE	FALSE
qmof-8a2fa8a	OTOXEB_FSR	Ag4Fe2C56H32N16	3.25712	5.88411	2.62699	-0.471702	2.15529	110	CSD						FALSE	FALSE	FALSE
qmof-80852fd	OVAZOB_FSR	Cu4C44H48N12O16	2.23165	6.11937	3.88772	-1.36003	2.5277	124	CSD						FALSE	FALSE	FALSE
qmof-41301bd	OWEVAP_FSR	Ni2C42H42N16O12	2.04995	6.13124	4.08129	-0.815755	3.26554	114	CSD						FALSE	FALSE	FALSE
qmof-e029d32	OWOTAX_FSR	Cu4C84H58N18O20	3.42447	6.85068	3.42621	-1.78486	1.64135	184	CSD						FALSE	FALSE	FALSE
qmof-98ad58c	OWUGAP_FSR	Cu6C88H108N48O36S4	3.34415	7.59857	4.25442	-2.18309	2.07133	290	CSD						FALSE	FALSE	FALSE
qmof-d6e31ae	OXELEK_FSR	Cu4C48H40I4N12	2.29323	4.99098	2.69774	0.833049	3.53079	108	CSD						FALSE	FALSE	FALSE
qmof-8ccd305	OXOKAO_FSR	Cu2C30Cl2H36N12	1.98098	4.49512	2.51414	0.608089	3.12223	82	CSD						FALSE	FALSE	FALSE
qmof-dce5b26	OXOQIC_FSR	Cu4V4C42H42N12O12	2.85071	5.34643	2.49572	0.294227	2.78994	116	CSD						FALSE	FALSE	FALSE
qmof-6db4857	OXUPEE02_FSR	Cu2C52H56N4O16	2.47275	6.00399	3.53124	-1.02093	2.51031	130	CSD						FALSE	FALSE	FALSE
qmof-88b90c9	OYUCAN_FSR	Cu2C24H34N6O10	2.01138	5.24245	3.23108	-0.199254	3.03182	76	CSD						FALSE	FALSE	FALSE
qmof-6919937	OZONIC_FSR	Ni2C32H24N20O8	2.93641	6.70784	3.77143	-0.544345	3.22709	86	CSD						FALSE	FALSE	FALSE
qmof-4a54aa8	OZUKOL_FSR	Mn6C24H12O18	3.72344	6.59597	2.87252	-3.19677	-0.324244	60	CSD						FALSE	FALSE	FALSE
qmof-0344ac0	PADDOP_FSR	Cu2C28H32N20O12	2.64507	6.52835	3.88328	-0.778084	3.10519	94	CSD						FALSE	FALSE	FALSE
qmof-34239b6	PAPROO_FSR	Cu6Tb4C48H60N12O48	2.15487	6.24344	4.08857	-2.02002	2.06855	178	CSD						FALSE	FALSE	FALSE
qmof-f0e967a	PAPRUU_FSR	La2Ni3C24H30N6O24	1.1393	5.76937	4.63007	-1.26109	3.36898	89	CSD						FALSE	FALSE	FALSE
qmof-6346309	PARPIK_FSR	CuC6H6N8O4	2.96614	7.07798	4.11184	-0.7493	3.36254	25	CSD						FALSE	FALSE	FALSE
qmof-0906587	PASGEY_FSR	Cu2C24H20N8O20	4.66414	8.26591	3.60177	-1.42051	2.18126	74	CSD						FALSE	FALSE	FALSE
qmof-35f10de	PASMII_FSR	Ni2C68Cl4H56N8O8	2.77552	6.18841	3.41289	-0.660556	2.75234	146	CSD						FALSE	FALSE	FALSE
qmof-37e26c7	PATHOI_FSR	Cu4C28Cl4H28N12O4	4.14938	5.54404	1.39466	0.414531	1.80919	80	CSD						FALSE	FALSE	FALSE
qmof-925aafd	PATZAO_FSR	CuC14F6H6N2O4	2.92661	6.77764	3.85103	-1.11816	2.73287	33	CSD						FALSE	FALSE	FALSE
qmof-20f3edb	PAZBEY01_FSR	Cu2C38H36N4O8	3.07718	6.27153	3.19435	-1.09644	2.09791	88	CSD						FALSE	FALSE	FALSE
qmof-3c5676c	PEBMEQ_FSR	CuC14H12N10	2.89776	6.56237	3.66461	-1.20287	2.46174	37	CSD						FALSE	FALSE	FALSE
qmof-0aaa20a	PEDSUN_FSR	Ni2C16H14N6O2S4	2.838	5.91551	3.0775	0.06664	3.14414	44	CSD						FALSE	FALSE	FALSE
qmof-b11bf9e	PEGTUS_FSR	Cu2C28H38N2O20P6	3.1295	6.63613	3.50663	-0.436414	3.07021	96	CSD						FALSE	FALSE	FALSE
qmof-c51a724	PEGTUS01_FSR	Cu2C28H38N2O20P6	3.03236	6.4587	3.42634	-0.429865	2.99648	96	CSD						FALSE	FALSE	FALSE
qmof-18b151e	PEGTUS02_FSR	Cu2C28H38N2O20P6	3.56384	7.07422	3.51038	-0.451578	3.0588	96	CSD						FALSE	FALSE	FALSE
qmof-edbe499	PEJVAD_FSR	CuC26H22N6O6	2.90118	5.81218	2.911	-0.742341	2.16866	61	CSD						FALSE	FALSE	FALSE
qmof-437fb3b	PEJVOR_FSR	CuC18H20N6O6	3.43502	6.79426	3.35924	-0.966645	2.3926	51	CSD						FALSE	FALSE	FALSE
qmof-004e466	PEJXAF01_FSR	Cu2C40H36N4O12P4	3.07142	6.34528	3.27386	-0.764969	2.50889	98	CSD						FALSE	FALSE	FALSE
qmof-9060c8b	PEKGIX_FSR	Ni4Sm4C88H48N20O32	2.58872	6.08528	3.49657	-1.04995	2.44661	196	CSD						FALSE	FALSE	FALSE
qmof-dd09d8f	PELBAM_FSR	Ag4C28H22N6O12	3.36307	6.13825	2.77518	-0.172698	2.60248	72	CSD						FALSE	FALSE	FALSE
qmof-b537f4f	PELBEQ_FSR	Ag4C28H22N6O12	3.47487	6.07591	2.60104	-0.07217	2.52887	72	CSD						FALSE	FALSE	FALSE
qmof-b544b11	PEPLOM_FSR	V4C32H16O20	3.67796	7.09691	3.41895	-2.84685	0.572097	72	CSD						FALSE	FALSE	FALSE
qmof-303c74f	PEPVEM_FSR	Cu4Mo8C48H36N12O26	3.54247	5.77007	2.2276	0.422742	2.65035	134	CSD						TRUE	TRUE	FALSE
qmof-b3f1619	PESBAR_FSR	Cu2C32H28N4O8	2.55477	6.24742	3.69265	-1.07905	2.6136	74	CSD						FALSE	FALSE	FALSE
qmof-648c41f	PETGON_FSR	Cu2C20H28N4O12S2	2.63566	6.98154	4.34588	-2.3679	1.97798	68	CSD						FALSE	FALSE	FALSE
qmof-88c6ebd	PEWFII01_FSR	CuUC10H6O12	3.6188	7.2597	3.6409	-2.14502	1.49588	30	CSD						FALSE	FALSE	FALSE
qmof-003f026	PEYGUW_FSR	Ca4C28H16N8O32	4.60369	7.04371	2.44002	-0.708796	1.73123	88	CSD						FALSE	FALSE	FALSE
qmof-09eb351	PEYHAF_FSR	Ni2C34H38N10O10	2.63686	5.75078	3.11392	-0.758367	2.35555	94	CSD						FALSE	FALSE	FALSE
qmof-f1b0a1e	PEYTEU_FSR	Er2C36H26O28	4.19823	6.58712	2.38889	-0.971574	1.41731	92	CSD						FALSE	FALSE	FALSE
qmof-8ac4d87	PEYTIY_FSR	Dy2C36H26O28	4.18188	6.60224	2.42037	-0.947958	1.47241	92	CSD						FALSE	FALSE	FALSE
qmof-c158d1f	PEYTOE_FSR	Tb2C36H26O28	4.20786	6.62003	2.41217	-0.963616	1.44855	92	CSD						FALSE	FALSE	FALSE
qmof-204bfd2	PHALCV_FSR	Cu2C16H16O12	3.48295	7.14414	3.66119	-1.21768	2.44352	46	CSD						FALSE	FALSE	FALSE
qmof-fc17802	PIBFEM01_FSR	Co2C28H24N12O8S4	3.01962	5.85258	2.83296	-1.19518	1.63778	78	CSD						FALSE	FALSE	FALSE
qmof-b127925	PIDVOQ_FSR	Cu4C80H56N16O16	2.64231	6.65559	4.01328	-2.25358	1.7597	172	CSD						FALSE	FALSE	FALSE
qmof-12e958e	PIGYEK_FSR	Cu2C36H30N12O8S2	2.55758	6.15748	3.5999	-0.823087	2.77682	90	CSD						FALSE	FALSE	FALSE
qmof-a52b53c	PIJZAK_FSR	Ni2C32H52N8O8	2.20925	5.3798	3.17055	-0.358173	2.81238	102	CSD						FALSE	FALSE	FALSE
qmof-639e83a	PILWUF_FSR	Ni2C42H40N12O12	2.14645	6.25084	4.1044	-0.607635	3.49676	108	CSD						FALSE	FALSE	FALSE
qmof-b156e7f	PIQBAU_FSR	Mn2C46H40N8O10	2.42178	5.35176	2.92998	0.238164	3.16814	106	CSD						FALSE	FALSE	FALSE
qmof-dc694ac	PITMUB_FSR	CuC18H16N6O12	3.62043	6.55671	2.93628	-0.556373	2.3799	53	CSD						FALSE	FALSE	FALSE
qmof-9a204c1	PIZQOG_FSR	Cu8C76H96N24O24	2.71467	6.584	3.86933	-2.56309	1.30623	228	CSD						FALSE	FALSE	FALSE
qmof-5533c80	PIZREX_FSR	Cu8C76H96N24O24	2.70404	6.4379	3.73386	-2.62625	1.1076	228	CSD						FALSE	FALSE	FALSE
qmof-b8000f1	POBHIZ_FSR	Cu2C24H32N4O12S2	3.0933	7.17005	4.07675	-1.17727	2.89948	76	CSD						FALSE	FALSE	FALSE
qmof-85fbc0d	POCNUS_FSR	Co2C28H36N8O8	1.47701	5.15055	3.67354	0.018767	3.6923	82	CSD						FALSE	FALSE	FALSE
qmof-0b7af5b	POJTIS01_FSR	CoC20H18N8O6	2.46407	6.05357	3.5895	-0.845281	2.74422	53	CSD						FALSE	FALSE	FALSE
qmof-469075b	POLDIE_FSR	Cu2C16H16N12O8	2.55398	6.4788	3.92482	-0.922625	3.00219	54	CSD						FALSE	FALSE	FALSE
qmof-1e1bf28	POLJEG_FSR	CoC28H22N10O6	3.13031	6.21861	3.0883	-0.51968	2.56862	67	CSD						FALSE	FALSE	FALSE
qmof-4e113a2	POLMEJ_FSR	Cu4C20Cl4H32N12O24	3.02176	7.18698	4.16521	-1.30845	2.85677	96	CSD						FALSE	FALSE	FALSE
qmof-13acee7	POMKIM_FSR	Fe2C42H28N4O14	2.75163	5.45511	2.70348	-0.037293	2.66619	90	CSD						FALSE	FALSE	FALSE
qmof-792ff35	PONHEG_FSR	Cu2Hg4C24Cl12H56N16O8	2.84344	6.81887	3.97543	-1.20159	2.77384	122	CSD						FALSE	FALSE	FALSE
qmof-dbc27ec	POPVIC_FSR	Ni2C56H40N4O8	2.94664	5.84755	2.9009	-1.54729	1.35361	110	CSD						FALSE	FALSE	FALSE
qmof-47dde23	POQWAU02_FSR	Co4C52H44N8O20	3.69309	6.52524	2.83215	-0.738188	2.09396	128	CSD						FALSE	FALSE	FALSE
qmof-7b5e892	PORKOY_FSR	CoC12Cl2H18N24	1.64847	5.6267	3.97823	0.72477	4.703	57	CSD						FALSE	FALSE	FALSE
qmof-a51b2a6	PORVUO_FSR	Zn2C52H36N4O8	3.74995	5.76404	2.01409	-1.64061	0.373481	102	CSD						TRUE	FALSE	FALSE
qmof-a09abf4	POYQOK_FSR	Mn2C38Cl4H26N2O10	1.93047	4.1729	2.24243	0.722236	2.96467	82	CSD						FALSE	FALSE	FALSE
qmof-39d4547	PRCUDX_FSR	Cu4C32H56O20	3.05822	7.04989	3.99167	-1.95656	2.03511	112	CSD						FALSE	FALSE	FALSE
qmof-b4bad2f	PUDGIG_FSR	Co4C80H72N16O16	2.58477	6.38508	3.80031	-1.50817	2.29214	188	CSD						FALSE	FALSE	FALSE
qmof-458f21b	PUMCIL_FSR	CdC14H10N6S2	3.53017	5.83926	2.30909	-0.077665	2.23143	33	CSD						TRUE	TRUE	FALSE
qmof-460d167	PUMYEE_FSR	Cd8C192H112N16O32S32	2.65556	4.47794	1.82238	-0.494861	1.32752	392	CSD						FALSE	FALSE	FALSE
qmof-d5697d2	PUNZEE_FSR	Ni3C14H24N2O18P4	2.72806	6.44387	3.71581	-0.419331	3.29648	65	CSD						FALSE	FALSE	FALSE
qmof-7c7b193	PUQHAL_FSR	Ni16C80H80O80	2.05402	6.47036	4.41633	-1.50538	2.91095	256	CSD						FALSE	FALSE	FALSE
qmof-fd9adfa	PUVQUT_FSR	Mn2C18H22N18O4	2.68595	5.5961	2.91015	0.178842	3.08899	64	CSD						FALSE	FALSE	FALSE
qmof-5cd94b8	PUYREH01_FSR	Cu4C44H44N4O20	2.85051	6.75862	3.9081	-1.90396	2.00415	116	CSD						FALSE	FALSE	FALSE
qmof-a6f4cc1	PYAZCU10_FSR	Cu4C20H16N12	3.05242	5.60008	2.54766	0.052077	2.59974	52	CSD						FALSE	FALSE	FALSE
qmof-47d81d6	PYCACU01_FSR	Cu4C28H28N4O24	3.17709	7.35914	4.18204	-1.29234	2.8897	88	CSD						FALSE	FALSE	FALSE
qmof-687e4d6	QAFNES_FSR	CoC16H12N10O2	2.78393	6.20585	3.42192	-1.20209	2.21983	41	CSD						FALSE	FALSE	FALSE
qmof-d8bbac8	QAGWOL_FSR	Ni2C32H24N12S4	2.30657	5.89952	3.59295	-0.326256	3.26669	74	CSD						FALSE	FALSE	FALSE
qmof-bf50ae7	QAGYOO_FSR	Cu4C36H36N8O8	2.59849	5.22476	2.62627	-0.57196	2.05431	92	CSD						FALSE	FALSE	FALSE
qmof-e2276ee	QAKWUV_FSR	Mn2C32H16N20O4	3.33457	5.48761	2.15305	0.178861	2.33191	74	CSD						FALSE	FALSE	FALSE
qmof-effdd4d	QAMDEO_FSR	CuC14H12N4O4	2.37742	6.3385	3.96108	-1.21861	2.74247	35	CSD						FALSE	FALSE	FALSE
qmof-d962920	QANNEA_FSR	Cu4C68H68N20O20	2.84857	6.3681	3.51953	-2.16124	1.35828	180	CSD						FALSE	FALSE	FALSE
qmof-7e13f90	QANZEN_FSR	Ag4C112H84N8O8	3.49885	5.94219	2.44334	-0.557822	1.88552	216	CSD						TRUE	TRUE	FALSE
qmof-e89cb56	QAPSUY_FSR	Ni2C36H56N4O8P4S8	2.6927	5.2812	2.5885	-0.292149	2.29636	118	CSD						FALSE	FALSE	FALSE
qmof-cd42f10	QATWAL_FSR	Cu2C56F16H40N20O12	2.4336	6.5583	4.1247	-0.931509	3.19319	146	CSD						FALSE	FALSE	FALSE
qmof-694381f	QAVZAQ_FSR	Nd2NiC26H22N6O20	2.4806	6.18858	3.70798	-0.691097	3.01689	77	CSD						FALSE	FALSE	FALSE
qmof-3f0a2ed	QAXCAU_FSR	Ag4C16H8N12O12	3.17162	5.5287	2.35708	0.214596	2.57167	52	CSD						FALSE	FALSE	FALSE
qmof-053334d	QAYGOP_FSR	CoC30H30N6O6	2.91892	6.2726	3.35368	-0.54052	2.81316	73	CSD						FALSE	FALSE	FALSE
qmof-743e1bf	QAYKUZ_FSR	NiC26H16N2O10	2.85594	6.85478	3.99885	-0.721616	3.27723	55	CSD						FALSE	FALSE	FALSE
qmof-405a87b	QAZKEK_FSR	Cu2C20H14N6O8	3.43648	7.00148	3.56499	-0.624023	2.94097	50	CSD						FALSE	FALSE	FALSE
qmof-897ea77	QEBGAH_FSR	Co4C120H68N12O24	3.3885	6.53958	3.15108	-2.37714	0.773936	228	CSD						FALSE	FALSE	FALSE
qmof-d6798a9	QEJLUN01_FSR	Ag4C32H24N12O12	2.90041	5.64764	2.74723	-0.105666	2.64156	84	CSD						FALSE	FALSE	FALSE
qmof-ec55375	QEMYIQ_FSR	Cu4C48H56N8O12	2.47295	6.28793	3.81498	-1.1679	2.64707	128	CSD						FALSE	FALSE	FALSE
qmof-16738f7	QENHOG_FSR	Cu8C112H64N40	2.57935	5.11544	2.53609	-0.38154	2.15455	224	CSD						FALSE	FALSE	FALSE
qmof-de0737b	QEQKIJ_FSR	FeHg2C30H20N10S6	3.09376	5.49022	2.39646	-0.234865	2.1616	69	CSD						FALSE	FALSE	FALSE
qmof-9174c13	QEQLAC_FSR	FeHg2C34H28N14S6	3.50312	5.94903	2.44591	-0.760075	1.68583	85	CSD						TRUE	TRUE	FALSE
qmof-145af0e	QERWAL_FSR	Ni6C96H84N24O24	1.97575	6.18251	4.20676	-3.05941	1.14735	234	CSD						FALSE	FALSE	FALSE
qmof-9188690	QESYET_FSR	Cu4C64H80I4N16	3.23715	5.29829	2.06114	-0.781954	1.27918	168	CSD						FALSE	FALSE	FALSE
qmof-2ade4ad	QEYWOH_FSR	Cu2C24H20N24O8	3.15309	7.35045	4.19735	-1.15515	3.0422	78	CSD						FALSE	FALSE	FALSE
qmof-4e43b18	QEZBUV_FSR	Cd4C80Cl8H64N8O8	3.59617	6.11973	2.52356	-2.28661	0.236951	172	CSD						FALSE	FALSE	FALSE
qmof-9f315fd	QEZLAK_FSR	Cu4C144H108I4N28O12	2.75894	4.82925	2.07031	-0.77696	1.29335	300	CSD						FALSE	FALSE	FALSE
qmof-593a48e	QIHPOP_FSR	Ni2C28H16N16	2.38989	5.97145	3.58156	-0.226106	3.35545	62	CSD						FALSE	FALSE	FALSE
qmof-d481578	QIJWOY_FSR	Cd4C32H16N40O4S4	5.01246	7.15127	2.13881	-0.202334	1.93648	100	CSD						FALSE	FALSE	FALSE
qmof-053dc27	QIQRUF_FSR	Cu2C40H38N6O14	3.88495	7.16989	3.28494	-1.34249	1.94245	100	CSD						FALSE	FALSE	FALSE
qmof-9fe4370	QISWUM_FSR	Co2C60H52N8O14	3.23563	6.8553	3.61968	-0.814826	2.80485	136	CSD						FALSE	FALSE	FALSE
qmof-e80fd66	QITVUL_FSR	Cu2Sr2C28H20N4O22	3.41161	6.80111	3.3895	-0.66162	2.72788	78	CSD						FALSE	FALSE	FALSE
qmof-2d93e62	QIWBAB_FSR	Zn8C128H96N32O32	4.42198	6.83897	2.41699	-2.87581	-0.458823	296	CSD						FALSE	FALSE	FALSE
qmof-9a8fdd8	QIYYAZ_FSR	Cu2C22H18N4O12P2	2.74909	6.42973	3.68064	-0.703082	2.97756	60	CSD						FALSE	FALSE	FALSE
qmof-9044ea9	QOGFOI_FSR	Dy2NiC12H14N2O18	2.8447	6.82762	3.98293	-0.640999	3.34193	49	CSD						FALSE	FALSE	FALSE
qmof-9fa0d98	QOGTIQ_FSR	Cu4C28H16N16O4	3.3567	5.81634	2.45963	-0.235635	2.224	68	CSD						TRUE	TRUE	TRUE
qmof-4d684e3	QOJLOR_FSR	Cu2C56H36N8O10	3.43504	5.68423	2.2492	-0.009818	2.23938	112	CSD						TRUE	TRUE	FALSE
qmof-13ec2a4	QOKHIH_FSR	Ti2C68H52N4O8	3.07955	5.09063	2.01108	0.442405	2.45349	134	CSD						FALSE	FALSE	FALSE
qmof-2a8957f	QOLKUX_FSR	CoC38H32N6O4S2	2.15702	5.59787	3.44085	-0.656628	2.78423	83	CSD						FALSE	FALSE	FALSE
qmof-3336366	QOPHAF_FSR	Fe4Zn4C88H64N8O16	3.22559	5.97551	2.74993	-1.53578	1.21415	184	CSD						FALSE	FALSE	FALSE
qmof-e7c726e	QOTBOQ_FSR	NiC24H22N2O14	3.10101	6.28302	3.18201	-0.231157	2.95085	63	CSD						FALSE	FALSE	FALSE
qmof-375c7bc	QOTJOY_FSR	Cu2C36H44N4O12	3.0045	6.42061	3.41611	-1.30008	2.11603	98	CSD						FALSE	FALSE	FALSE
qmof-8342c5f	QOXQOJ01_FSR	Cu2C14H14N2O12	3.75481	7.88379	4.12899	-1.2585	2.87048	44	CSD						FALSE	FALSE	FALSE
qmof-6c38eb4	QOZHEU01_FSR	Ni2C48H28N8O16	3.62066	6.48305	2.86239	-0.896704	1.96569	102	CSD						FALSE	FALSE	FALSE
qmof-421f50d	QQQBOG05_FSR	Ni2C4H8O12	3.24479	7.7231	4.47832	-1.79635	2.68196	26	CSD						FALSE	FALSE	FALSE
qmof-45aee87	QQQDDA02_FSR	Ni2C10Cl4H10N2	2.21177	6.36387	4.15209	-0.217295	3.9348	28	CSD						FALSE	FALSE	FALSE
qmof-a42d702	QUCVEQ_FSR	Cu4C28H18N10S4	3.0478	5.36436	2.31656	1.34371	3.66027	64	CSD						FALSE	FALSE	FALSE
qmof-a36c542	QUCVIU_FSR	Cu4C28H18N10S4	2.68571	5.13085	2.44514	1.27472	3.71986	64	CSD						FALSE	FALSE	FALSE
qmof-182d6dc	QUFBID_FSR	Cu2C36F8H16N4O8	2.80235	6.59831	3.79596	-0.763946	3.03201	74	CSD						FALSE	FALSE	FALSE
qmof-f49b443	QUFBUP_FSR	Cu4C56F16H32N8O16	3.88039	7.72044	3.84005	-1.2437	2.59635	132	CSD						FALSE	FALSE	FALSE
qmof-c530710	QUJJUB_FSR	Mn2C16H16O16	3.57584	5.97686	2.40102	0.568058	2.96908	50	CSD						TRUE	TRUE	FALSE
qmof-9b79393	QUJPES_FSR	Ca2Cu2C28H12N4O16	2.87184	6.75084	3.879	-1.02352	2.85548	64	CSD						FALSE	FALSE	FALSE
qmof-8e732a8	QUMGUC_FSR	Cu4Br2C36H24N10	1.7679	4.44159	2.67368	0.821924	3.49561	76	CSD						FALSE	FALSE	FALSE
qmof-1eea8fc	QUNXED_FSR	Ag2C44H46N4O8	4.06807	6.50923	2.44116	-0.117627	2.32354	104	CSD						FALSE	FALSE	FALSE
qmof-981431f	QUNZOP_FSR	CoC6H8N8O6	3.43142	6.62947	3.19805	-1.27954	1.91851	29	CSD						FALSE	FALSE	FALSE
qmof-030e486	QUNZUV_FSR	FeC6H8N8O6	3.70502	6.66133	2.95631	-1.21857	1.73774	29	CSD						FALSE	FALSE	FALSE
qmof-12c6f7b	QUPBEJ_FSR	Fe2C44H40N20O12	2.56451	5.73286	3.16835	-0.43395	2.7344	118	CSD						FALSE	FALSE	FALSE
qmof-98f643f	QUQPUO_FSR	Zn4C72H48N20O8	3.17522	4.83995	1.66472	-0.103618	1.5611	152	CSD						FALSE	FALSE	FALSE
qmof-a653a76	QUTHOD_FSR	Co2C36H36N8O8	2.18754	6.11591	3.92837	-0.997325	2.93105	90	CSD						FALSE	FALSE	FALSE
qmof-78f6bfc	QUZDUM_FSR	HgC12Cl2H8N6	3.96748	6.67056	2.70307	-0.927159	1.77591	29	CSD						FALSE	FALSE	FALSE
qmof-1c721d8	QUZFAU_FSR	HgBr2C12H8N6	3.94896	6.67545	2.72649	-1.05731	1.66918	29	CSD						FALSE	FALSE	FALSE
qmof-ccf3de7	QUZGEZ_FSR	CuSr2C18H26O22	3.19961	6.77671	3.5771	-1.27712	2.29998	69	CSD						FALSE	FALSE	FALSE
qmof-ff432b6	RABMUE_FSR	Co2C28H20N12O8	2.59394	6.21358	3.61964	-0.357134	3.26251	70	CSD						FALSE	FALSE	FALSE
qmof-10ddadb	RACBUU_FSR	Cu2C12H20N8O16S4	3.04836	7.06743	4.01906	-1.02771	2.99135	62	CSD						FALSE	FALSE	FALSE
qmof-6e4326e	RAHDIQ_FSR	Ni2C38H46N12O12S2	1.72243	6.39576	4.67333	-1.38939	3.28394	112	CSD						FALSE	FALSE	FALSE
qmof-7a361fd	RAHQOI_FSR	CuC20H14N10O14S4	4.45042	7.10415	2.65373	-0.46705	2.18668	63	CSD						FALSE	FALSE	FALSE
qmof-8cdca87	RAHREZ_FSR	CuC26H20N14O14S8	3.77562	6.68795	2.91234	-0.147376	2.76496	83	CSD						FALSE	FALSE	FALSE
qmof-5edf8d7	RALRON_FSR	CuPdC20H24N12	2.53043	6.73117	4.20074	-1.5356	2.66514	58	CSD						FALSE	FALSE	FALSE
qmof-edd4ef0	RAMHES01_FSR	Co2C40H28N4O10	2.57072	5.59722	3.02651	-0.221727	2.80478	84	CSD						FALSE	FALSE	FALSE
qmof-f72ed6d	RAMHIW_FSR	Cu2C40H24N4O8	3.29693	6.80741	3.51048	-0.909634	2.60085	78	CSD						FALSE	FALSE	FALSE
qmof-684e6eb	RAPZEP_FSR	FeC36H38O4P2	1.74056	5.30032	3.55976	-0.029435	3.53032	81	CSD						FALSE	FALSE	FALSE
qmof-cad1202	RAQHIC_FSR	K8Ni2Sn18C72H144O36	1.0123	2.69469	1.68239	1.16615	2.84854	280	CSD						FALSE	FALSE	FALSE
qmof-a123871	RARZAN_FSR	Cu2C20H24N4O10	3.34141	6.35793	3.01652	-0.415941	2.60058	60	CSD						FALSE	FALSE	FALSE
qmof-70f59fa	RATDUO01_FSR	Ag4Fe2C36H16N12	3.73108	5.85311	2.12203	0.176661	2.29869	70	CSD						TRUE	FALSE	FALSE
qmof-4774c35	RATFEA_FSR	Fe2Ni2C76H48N12	3.03242	5.55808	2.52566	-0.305294	2.22037	140	CSD						FALSE	FALSE	FALSE
qmof-1a922d4	RAYWEW_FSR	Cu2C42H38I2N2P2	2.61737	5.04029	2.42292	0.411976	2.83489	88	CSD						FALSE	FALSE	FALSE
qmof-9ff30cc	RAZBAW_FSR	Ag4C48Cl4H32N16O16	3.29823	6.08129	2.78306	-0.303928	2.47913	120	CSD						FALSE	FALSE	FALSE
qmof-831f088	RAZBUR_FSR	Cu8C44H32N16O28	3.14622	7.17829	4.03207	-0.713834	3.31824	128	CSD						FALSE	FALSE	FALSE
qmof-08b67ba	RAZGEF_FSR	Ni2C40H40N16O8	2.17075	5.8436	3.67286	-0.370423	3.30243	106	CSD						FALSE	FALSE	FALSE
qmof-6247dea	RAZGOQ_FSR	Cu8C32H48O48	3.00015	7.21705	4.2169	-2.31172	1.90518	136	CSD						FALSE	FALSE	FALSE
qmof-d03c776	REBROH_FSR	Cu2Br2C44H36N2P2	2.82371	5.16554	2.34184	0.270673	2.61251	88	CSD						FALSE	FALSE	FALSE
qmof-65f6051	REDSEZ01_FSR	CoC26H28N10	2.12979	4.87087	2.74108	0.009392	2.75047	65	CSD						FALSE	FALSE	FALSE
qmof-d68a206	REKBAL_FSR	Cu4Mo8C32H24N8O26	4.28872	6.48529	2.19657	1.46261	3.65918	102	CSD						FALSE	FALSE	FALSE
qmof-67dd780	REKSAC_FSR	CoC8H12N8O4	2.0005	6.59692	4.59642	-0.555455	4.04097	33	CSD						FALSE	FALSE	FALSE
qmof-11a9c18	RELZUF_FSR	Cu2C16Cl2H18N4O6S2	2.96014	6.68191	3.72176	-0.877154	2.84461	50	CSD						FALSE	FALSE	FALSE
qmof-00744ff	REMVUC_FSR	Zn4C24H22N22O12	3.78748	6.25415	2.46667	-0.214627	2.25204	84	CSD						TRUE	FALSE	FALSE
qmof-f2fe5ba	REQDEY_FSR	Cu4C56H32N48	3.32232	7.0554	3.73308	-1.26335	2.46973	140	CSD						FALSE	FALSE	FALSE
qmof-453d314	REQPOV_FSR	UC18H24N2O14P2	3.63352	6.19173	2.5582	-0.631124	1.92708	61	CSD						FALSE	FALSE	FALSE
qmof-b7f954d	RERJAC_FSR	FeC34H24N14O2S2	2.28231	5.61687	3.33456	-0.061685	3.27288	77	CSD						FALSE	FALSE	FALSE
qmof-b87071b	RESSAK_FSR	Ni2C36H26N4O10S	3.48987	6.29837	2.8085	-1.78881	1.01968	79	CSD						FALSE	FALSE	FALSE
qmof-728c062	REYBAA_FSR	Zn4C88H60N16O20	3.88211	5.9431	2.06099	-1.44507	0.615913	188	CSD						FALSE	FALSE	FALSE
qmof-80be546	RIKREL_FSR	CeC12H10O6P2	4.57788	7.14274	2.56485	-1.58606	0.978789	31	CSD						FALSE	FALSE	FALSE
qmof-824f9fd	RINMUZ_FSR	Cu4C48H40N16O20S8	3.08012	6.41861	3.33849	-1.4434	1.89508	136	CSD						FALSE	FALSE	FALSE
qmof-a9f2188	RIPFIG_FSR	Au4Cu2C24H36N12	3.44129	6.80697	3.36569	-1.2709	2.09478	78	CSD						FALSE	FALSE	FALSE
qmof-514abfb	RIPFOM_FSR	Au2Cu2C20Cl2H36N8O8	3.10878	6.94369	3.8349	-1.38081	2.4541	78	CSD						FALSE	FALSE	FALSE
qmof-8bbd7b4	RIPTOA_FSR	Cu2C14H10I2N4O2	2.30712	4.33809	2.03097	1.85916	3.89012	34	CSD						FALSE	FALSE	FALSE
qmof-4c97440	RIPTUG_FSR	Cu4C44H28I4N8O4	3.57333	5.61921	2.04588	1.0947	3.14058	92	CSD						FALSE	FALSE	FALSE
qmof-e2d2c46	RITDAB_FSR	Cu2In2C48H32N8O16	2.72282	5.33707	2.61425	-1.47943	1.13482	108	CSD						FALSE	FALSE	FALSE
qmof-545c247	RIVBAC_FSR	Zn4C48H40I8N16	3.708	6.02245	2.31445	0.10799	2.42244	116	CSD						TRUE	FALSE	FALSE
qmof-8366080	RIWTIC_FSR	U2C52H44O22	3.09772	5.73057	2.63285	-0.482182	2.15067	120	CSD						FALSE	FALSE	FALSE
qmof-3f10a21	RIWVAV_FSR	Co2C44H36N8O8	2.22539	6.37891	4.15352	-1.05765	3.09587	98	CSD						FALSE	FALSE	FALSE
qmof-7d6715f	RIWVEZ_FSR	Ni2C36H36N8O8	2.02772	6.24839	4.22067	-0.952558	3.26811	90	CSD						FALSE	FALSE	FALSE
qmof-b023388	RIWVEZ01_FSR	Ni2C36H36N8O8	2.28614	6.47598	4.18984	-1.0946	3.09524	90	CSD						FALSE	FALSE	FALSE
qmof-b77db05	RIZQIA_FSR	Cu2K4C8H16O24	3.05704	7.10129	4.04425	-2.15463	1.88962	54	CSD						FALSE	FALSE	FALSE
qmof-9d8bf1c	ROBNEC_FSR	Cu2C34H44N4O10	2.99353	6.10148	3.10796	-1.506	1.60196	94	CSD						FALSE	FALSE	FALSE
qmof-25af73a	ROBNIG_FSR	Cu2Br2C34H44N2O6	2.72219	5.75794	3.03574	-0.818965	2.21678	90	CSD						FALSE	FALSE	FALSE
qmof-0e72b85	RODMED_FSR	Ag4C96H84N16O16	4.17068	6.89872	2.72804	-2.02977	0.698272	216	CSD						FALSE	FALSE	FALSE
qmof-1665525	ROGROV_FSR	Cd4C64H48N8O24	3.03437	5.90663	2.87227	-2.2802	0.592066	148	CSD						FALSE	FALSE	FALSE
qmof-c8f72fc	ROGSAI_FSR	Ni8C44H48N4O36	2.8676	6.17362	3.30602	-2.69688	0.609136	140	CSD						FALSE	FALSE	FALSE
qmof-5ce36bf	ROGSIQ_FSR	Cu4C76H56N8O28	3.08256	7.21212	4.12956	-2.16309	1.96647	172	CSD						FALSE	FALSE	FALSE
qmof-9d07fdc	ROGSUE_FSR	Cu2C14Cl2H16N8S2	2.61264	5.02092	2.40829	0.187576	2.59586	44	CSD						FALSE	FALSE	FALSE
qmof-718ab88	ROJHUU_FSR	CoC32H28N14S2	2.01355	5.05076	3.03722	-0.182719	2.8545	77	CSD						FALSE	FALSE	FALSE
qmof-e4f98a0	RONCAZ_FSR	Cd4C140H88N8O24	3.11485	5.18606	2.0712	-0.604992	1.46621	264	CSD						FALSE	FALSE	FALSE
qmof-9433b10	ROPWEA_FSR	Mo2C30H24N4O12	3.97508	5.58441	1.60933	-0.547585	1.06174	72	CSD						FALSE	FALSE	FALSE
qmof-4b3dce4	ROQQUL_FSR	CuUC14H10N2O12	3.08228	6.72521	3.64293	-0.82917	2.81376	40	CSD						FALSE	FALSE	FALSE
qmof-8ccaa8e	ROSFOW_FSR	Ag4C12H32N28	3.83725	6.36613	2.52888	-0.223058	2.30582	76	CSD						FALSE	FALSE	FALSE
qmof-fd023ea	ROZSOP_FSR	Cu2C56H40N8O8	3.06881	6.83853	3.76972	-1.30288	2.46685	114	CSD						FALSE	FALSE	FALSE
qmof-03cca0a	RUJFOS_FSR	Co4C52H36N8O16	3.39838	6.27825	2.87987	-0.929494	1.95038	116	CSD						FALSE	FALSE	FALSE
qmof-7076722	RUKTIB_FSR	Cu4C40H64N16O12	2.2717	5.98979	3.71809	-1.07685	2.64124	136	CSD						FALSE	FALSE	FALSE
qmof-e88ad2b	RUMFAI_FSR	Ag4C42H36N8O16	3.39707	6.07016	2.67309	-0.705055	1.96803	106	CSD						FALSE	FALSE	FALSE
qmof-9653578	RUQGAN_FSR	Mn2Br2C36H40N4O8	2.85164	5.26837	2.41674	-0.169092	2.24765	92	CSD						FALSE	FALSE	FALSE
qmof-ab32015	RURZIP_FSR	Zn4C28H32N12	3.52233	5.57029	2.04795	-1.3362	0.711754	76	CSD						FALSE	FALSE	FALSE
qmof-7dbddd2	SABWEA_FSR	CuPr2C32H20N4O28	3.94289	7.40216	3.45927	-2.56115	0.898121	87	CSD						FALSE	FALSE	FALSE
qmof-545a299	SABWOK_FSR	CuDy2C32H16N4O26	4.04794	7.67305	3.62511	-2.01919	1.60592	81	CSD						FALSE	FALSE	FALSE
qmof-fd388d5	SABWUQ_FSR	CuDy2C32H20N4O28	3.7843	7.44882	3.66452	-2.38867	1.27585	87	CSD						FALSE	FALSE	FALSE
qmof-3b9b0b0	SABXAX_FSR	CuTb2C32H16N4O26	4.4462	8.04298	3.59678	-2.02437	1.57241	81	CSD						FALSE	FALSE	FALSE
qmof-9513924	SABXUR_FSR	CuNd2C32H16N4O26	4.28051	7.91569	3.63519	-2.13092	1.50426	81	CSD						FALSE	FALSE	FALSE
qmof-ddefcd4	SABYAY_FSR	CuNd2C32H20N4O28	3.48124	7.02996	3.54872	-2.50388	1.04484	87	CSD						FALSE	FALSE	FALSE
qmof-2f9f102	SABYEC_FSR	CuSm2C32H16N4O26	4.02014	7.66377	3.64363	-2.13958	1.50404	81	CSD						FALSE	FALSE	FALSE
qmof-a9114c3	SABYIG_FSR	CuSm2C32H20N4O28	3.45695	6.96311	3.50616	-2.40626	1.0999	87	CSD						FALSE	FALSE	FALSE
qmof-c98e6d4	SABZAZ_FSR	CuHo2C32H16N4O26	4.27238	7.87228	3.5999	-2.02786	1.57203	81	CSD						FALSE	FALSE	FALSE
qmof-00a989b	SABZED_FSR	CuHo2C32H20N4O28	3.48462	6.96659	3.48197	-2.36022	1.12176	87	CSD						FALSE	FALSE	FALSE
qmof-e273077	SABZIH_FSR	CuGd2C32H16N4O26	4.0173	7.6673	3.65001	-2.06132	1.58868	81	CSD						FALSE	FALSE	FALSE
qmof-0f5fd80	SABZON_FSR	CuGd2C32H20N4O28	3.47744	6.99786	3.52041	-2.41527	1.10515	87	CSD						FALSE	FALSE	FALSE
qmof-7193001	SACSEV_FSR	Cu2C8Cl2H8N4	2.87157	5.30255	2.43098	1.02884	3.45981	24	CSD						FALSE	FALSE	FALSE
qmof-3a8ae72	SACSIZ_FSR	Cu8C16Cl8H16N8	2.58551	5.32071	2.7352	1.22239	3.95758	56	CSD						FALSE	FALSE	FALSE
qmof-a5c1558	SAFKER_FSR	Cu2C26H30N6O10	2.33629	6.31774	3.98145	-1.40192	2.57952	74	CSD						FALSE	FALSE	FALSE
qmof-00e18cb	SAGSUP01_FSR	CuC20H20N8O4	2.48998	6.50378	4.01381	-1.1066	2.9072	53	CSD						FALSE	FALSE	FALSE
qmof-a62b5e5	SAPVOV_FSR	CuC16H20O12P2	3.23986	6.31818	3.07832	-0.633744	2.44458	51	CSD						FALSE	FALSE	FALSE
qmof-8e256bb	SAQGAU_FSR	CuC14H16N2O6	3.02074	7.00754	3.9868	-1.68999	2.2968	39	CSD						FALSE	FALSE	FALSE
qmof-4d8929f	SAQSOT_FSR	Cu4C16Cl4H16N8S4	3.37384	5.57812	2.20428	1.27354	3.47782	52	CSD						FALSE	FALSE	FALSE
qmof-6903e0b	SATBOE01_FSR	Cu4C48H48N8O16	3.0428	6.61351	3.57071	-1.49888	2.07184	124	CSD						FALSE	FALSE	FALSE
qmof-00f4cb5	SAVMIM_FSR	CoC16H26N4O12P4	3.25993	7.21931	3.95938	-0.069171	3.89021	63	CSD						FALSE	FALSE	FALSE
qmof-7dd9b74	SAWKUZ_FSR	Ni2C44H56N12O8S4	2.20038	5.7893	3.58892	-1.01547	2.57345	126	CSD						FALSE	FALSE	FALSE
qmof-5319a12	SAWTOZ_FSR	Cu4C28H28I4N4	2.10508	4.63985	2.53477	1.17433	3.70911	68	CSD						FALSE	FALSE	FALSE
qmof-5982646	SAWVER_FSR	Cu2Br2C14H14N2	2.39258	4.94619	2.55361	0.374789	2.9284	34	CSD						FALSE	FALSE	FALSE
qmof-9ae3430	SAWVUH_FSR	Cu4C40Cl4H36N4	2.34304	4.93787	2.59483	0.665713	3.26054	88	CSD						FALSE	FALSE	FALSE
qmof-b23591b	SAWWES_FSR	Cu4C40H36I4N4	2.31572	4.57911	2.2634	1.02911	3.29251	88	CSD						FALSE	FALSE	FALSE
qmof-11f5df1	SAXMIP_FSR	Ni2C32H30N10O10	2.58482	5.9844	3.39958	-0.86664	2.53294	84	CSD						FALSE	FALSE	FALSE
qmof-1a45ce8	SAYWUN_FSR	Cu2C52H30N10O8	3.40103	6.37041	2.96938	-0.369874	2.59951	102	CSD						FALSE	FALSE	FALSE
qmof-81af911	SAZLAJ_FSR	Cu2C46H36N20O8	3.22183	6.90397	3.68215	-1.01069	2.67146	112	CSD						FALSE	FALSE	FALSE
qmof-ae1a15f	SEBZIK_FSR	CoC32H30N2O10	2.57019	6.44848	3.87829	-0.594785	3.28351	75	CSD						FALSE	FALSE	FALSE
qmof-2c7948e	SEGBOX_FSR	Cu3C48H30N12O12	2.85862	6.3209	3.46227	-2.34151	1.12077	105	CSD						FALSE	FALSE	FALSE
qmof-3d17539	SEGHOB_FSR	Cu4C10Cl4H10N2	3.01487	5.36733	2.35246	0.409627	2.76208	30	CSD						FALSE	FALSE	FALSE
qmof-63d089a	SEHGOD_FSR	Ni2C38H36N6O12	2.31517	5.80633	3.49116	-0.897478	2.59369	94	CSD						FALSE	FALSE	FALSE
qmof-6f8a430	SEJTIL_FSR	Cu2C38H44O14	2.28591	6.29048	4.00457	-1.6157	2.38887	98	CSD						FALSE	FALSE	FALSE
qmof-855d1ed	SERGOO_FSR	CuC22F4H16N6O10	2.91019	6.68142	3.77123	-1.02011	2.75112	59	CSD						FALSE	FALSE	FALSE
qmof-cb3b518	SERGUU_FSR	Cu2C34F8H26N12O12	2.57358	6.16324	3.58966	-0.84087	2.74879	94	CSD						FALSE	FALSE	FALSE
qmof-6c6014c	SERZAT_FSR	Cu2C50H48N8O10	2.72222	5.77785	3.05563	-1.91877	1.13686	118	CSD						FALSE	FALSE	FALSE
qmof-9e7a580	SEVWOI_FSR	Ni4C124H100N8O36P4	3.5931	6.48369	2.89059	-1.18829	1.7023	276	CSD						FALSE	FALSE	FALSE
qmof-d53e130	SGLACU01_FSR	Cu4C36H36N4O16	2.65941	5.68021	3.0208	0.03558	3.05638	96	CSD						FALSE	FALSE	FALSE
qmof-73b7fe4	SIBFAN_FSR	CuC10Cl2H16N16O6	3.49751	7.26023	3.76272	-0.956448	2.80627	51	CSD						FALSE	FALSE	FALSE
qmof-88ffdd8	SIJRIN_FSR	Cu2C24H16N4O12	3.12552	7.08145	3.95593	-0.616302	3.33963	58	CSD						FALSE	FALSE	FALSE
qmof-7c7b7c4	SINSIU_FSR	NiC16H18N4O8	3.00172	6.31515	3.31343	-0.628289	2.68514	47	CSD						FALSE	FALSE	FALSE
qmof-042db04	SIPYAS01_FSR	Cu2Br2C46H38N2P2	2.85282	5.21296	2.36014	0.15689	2.51703	92	CSD						FALSE	FALSE	FALSE
qmof-2b351d2	SIPYIA_FSR	Cu2C48Cl2H40N2P2	3.09233	5.22219	2.12986	-0.407509	1.72235	96	CSD						FALSE	FALSE	FALSE
qmof-43a9124	SISPOC_FSR	Li4C44H32N4O16	4.11663	6.90013	2.7835	-1.1926	1.5909	100	CSD						FALSE	FALSE	FALSE
qmof-6204da9	SISZIG_FSR	Cd3C70H60N18O16S2	4.19216	6.93666	2.7445	-1.96017	0.784332	169	CSD						FALSE	FALSE	FALSE
qmof-a42e6fd	SIWGUB_FSR	Cu2C16H20O8	3.01955	6.87992	3.86036	-2.6752	1.18517	46	CSD						FALSE	FALSE	FALSE
qmof-358d837	SIWSOI_FSR	CuC22H16N6O10	3.12436	7.0291	3.90474	-2.1341	1.77064	55	CSD						FALSE	FALSE	FALSE
qmof-4cbd9c7	SIXKIU01_FSR	Ag2C10H6N4O4	2.92671	5.41156	2.48484	0.770719	3.25556	26	CSD						FALSE	FALSE	FALSE
qmof-28770b1	SOCDAQ_FSR	NiC14H20N18S2	2.14362	6.35524	4.21163	-0.489117	3.72251	55	CSD						FALSE	FALSE	FALSE
qmof-da4d665	SOCLUT_FSR	Ni4C76H68N8O24	2.69282	6.60349	3.91067	-1.44585	2.46483	180	CSD						FALSE	FALSE	FALSE
qmof-3816edb	SOCWIR_FSR	Cu4C16H36O28	3.99071	8.28867	4.29796	-3.23254	1.06542	84	CSD						FALSE	FALSE	FALSE
qmof-7322852	SODXEQ_FSR	Zn2C40H28N8O8	3.21357	6.1152	2.90162	-2.3927	0.508925	86	CSD						FALSE	FALSE	FALSE
qmof-eb98c8b	SOJMAH_FSR	Mn2C16H24N2O10	1.38685	4.77808	3.39123	0.770725	4.16195	54	CSD						FALSE	FALSE	FALSE
qmof-b5f87de	SOJTOA_FSR	Cu4C56H80I4N16S24	2.71872	5.06353	2.34482	-0.291414	2.05341	184	CSD						FALSE	FALSE	FALSE
qmof-ab54701	SOKDIH_FSR	Cu2C16H22N6O12S2	2.51644	6.97604	4.45959	-0.886403	3.57319	60	CSD						FALSE	FALSE	FALSE
qmof-ca6a000	SORVOL_FSR	Cu2C40H24N4O16	3.64164	7.23872	3.59708	-0.708411	2.88867	86	CSD						FALSE	FALSE	FALSE
qmof-cb3e9e8	SOSKOC_FSR	Co2C28Cl4H28N8	3.63037	7.04477	3.4144	-0.972102	2.4423	70	CSD						FALSE	FALSE	FALSE
qmof-3a1b292	SOTRID_FSR	CuC20H28N4O4S4	2.26531	5.69082	3.42551	-1.62565	1.79986	61	CSD						FALSE	FALSE	FALSE
qmof-18442f6	SUGVUM_FSR	Cu4C80H56N16O16	2.9648	7.10758	4.14278	-2.87778	1.26501	172	CSD						FALSE	FALSE	FALSE
qmof-d6d8373	SUJVUQ_FSR	Cu4Br4C28H28N20	3.56996	5.74667	2.17672	0.307083	2.4838	84	CSD						TRUE	TRUE	FALSE
qmof-0454c23	SUNMOE_FSR	CoC44H32N10O6	3.26371	5.69442	2.43071	0.12024	2.55095	93	CSD						TRUE	TRUE	TRUE
qmof-7dfd503	SUPLOF_FSR	Zn8C144H96N16O48	3.49061	5.49989	2.00928	-2.88778	-0.878496	312	CSD						FALSE	FALSE	FALSE
qmof-268a4cf	SUSMIE_FSR	Ni3C40H38N10O14P4	2.54099	5.63633	3.09534	-0.353289	2.74205	109	CSD						FALSE	FALSE	FALSE
qmof-d028335	SUSTEF_FSR	Cu2C28Cl4H32N16	2.73338	6.50837	3.77498	-1.19323	2.58175	82	CSD						FALSE	FALSE	FALSE
qmof-165659f	SUTJIC_FSR	Ni4C128H136N16O22	2.06107	6.04034	3.97927	-1.3506	2.62867	306	CSD						FALSE	FALSE	FALSE
qmof-28aae3b	SUYCIY_FSR	Cu4C28H32N8O12	2.4485	6.43718	3.98868	-1.3194	2.66927	84	CSD						FALSE	FALSE	FALSE
qmof-66698de	SUYDEV_FSR	Cu8C32H32N16	2.94391	5.44666	2.50275	-0.337573	2.16518	88	CSD						FALSE	FALSE	FALSE
qmof-7f0e6bf	SUZVEO_FSR	Ni4C38H26N14O2	2.81163	6.19032	3.3787	-1.00935	2.36934	84	CSD						FALSE	FALSE	FALSE
qmof-0091475	TACDIL_FSR	Tl2C12H8N2O6	3.65942	5.74782	2.0884	0.28877	2.37717	30	CSD						TRUE	FALSE	FALSE
qmof-89f6056	TADYII_FSR	Ni4W2C64H120N40	1.68103	5.34899	3.66796	-1.30746	2.3605	230	CSD						FALSE	FALSE	FALSE
qmof-a0b0c6b	TAGQUQ_FSR	Cu6C48H30N6O42	4.67315	8.67076	3.9976	-3.20355	0.79405	132	CSD						FALSE	FALSE	FALSE
qmof-8e16ab1	TAPHOH_FSR	CuC26H24N6O4S2	2.79642	6.52464	3.72822	-1.20884	2.51938	63	CSD						FALSE	FALSE	FALSE
qmof-8dcabcf	TASDAU_FSR	NiC28H50N4O4	1.09907	5.5249	4.42583	-0.367076	4.05875	87	CSD						FALSE	FALSE	FALSE
qmof-5075011	TAVTUG_FSR	Cu2C34H32N6O12P4	4.05178	7.1756	3.12383	-1.52288	1.60095	90	CSD						FALSE	FALSE	FALSE
qmof-00f576b	TAWNUC_FSR	Co2C34H22N8O8	2.63482	6.50199	3.86717	-0.778332	3.08884	74	CSD						FALSE	FALSE	FALSE
qmof-1fe9d39	TAZTOG_FSR	Cd2C16H20O12	3.61805	5.61538	1.99734	-0.405166	1.59217	50	CSD						FALSE	FALSE	FALSE
qmof-a3a09fc	TAZYOK_FSR	CuSm2C14H18N2O22S2	3.2842	7.55131	4.26711	-1.23865	3.02846	61	CSD						FALSE	FALSE	FALSE
qmof-add8947	TEBCOV_FSR	CdC8Cl2H8O6	3.89736	6.015	2.11764	-0.51821	1.59943	25	CSD						FALSE	FALSE	FALSE
qmof-bcdc0ff	TEBDIQ_FSR	Zn2C40Cl4H28N8O8	3.811	5.9335	2.12249	-0.604005	1.51849	90	CSD						FALSE	FALSE	FALSE
qmof-0267c10	TEBZEF_FSR	Ni2C12H12N4O12	3.8051	7.28004	3.47494	-0.666871	2.80807	42	CSD						FALSE	FALSE	FALSE
qmof-534fef5	TEJXIQ_FSR	Rb4C22H8N8O10	4.13386	5.68649	1.55263	-0.382071	1.17056	52	CSD						FALSE	FALSE	FALSE
qmof-611de0b	TEKLUS_FSR	NiC20H18I8O12	2.96539	6.67995	3.71456	0.002186	3.71675	59	CSD						FALSE	FALSE	FALSE
qmof-20e559b	TEKYOX_FSR	Ag4C28H12N8O24	4.2907	6.69621	2.40551	0.070426	2.47594	76	CSD						FALSE	FALSE	FALSE
qmof-9f6fc79	TEKYOX01_FSR	Ag4C28H12N8O24	4.69119	7.21263	2.52144	-0.372065	2.14937	76	CSD						FALSE	FALSE	FALSE
qmof-ca683eb	TERSUH_FSR	Ni2C54H44N8O12	3.33876	6.47127	3.13251	-0.71727	2.41524	120	CSD						FALSE	FALSE	FALSE
qmof-6d0ce1c	TEVMAJ_FSR	Cu4C28H28N4O24	3.03863	7.15672	4.11808	-1.28578	2.8323	88	CSD						FALSE	FALSE	FALSE
qmof-26d0da3	TEVVIC_FSR	Ni4C144H96N8O16	2.62845	6.09239	3.46394	-2.26099	1.20294	268	CSD						FALSE	FALSE	FALSE
qmof-006d43a	TEYWOL_FSR	Ag4C32H28N8O16	2.96341	5.64655	2.68314	0.065837	2.74898	88	CSD						FALSE	FALSE	FALSE
qmof-633a43e	TEZXUS_FSR	MnC26H24N6O2S2	2.52908	5.58174	3.05266	0.363113	3.41577	61	CSD						FALSE	FALSE	FALSE
qmof-9cfc8a3	TIBJEW_FSR	Cu2U2C24H24N4O26S2	4.09122	7.67605	3.58483	-1.22363	2.3612	84	CSD						FALSE	FALSE	FALSE
qmof-5038232	TIBQAX_FSR	Ni2C24H28N4O8	2.47455	6.10685	3.6323	-0.595244	3.03706	66	CSD						FALSE	FALSE	FALSE
qmof-86b73f0	TICLOI_FSR	CuGd2C14H18N2O22S2	3.37614	7.65696	4.28082	-1.14958	3.13124	61	CSD						FALSE	FALSE	FALSE
qmof-10c7c3c	TIHPEI_FSR	Cu2C24H24N6O10S2	3.42865	6.71386	3.28522	-1.2031	2.08212	68	CSD						FALSE	FALSE	FALSE
qmof-d84f27e	TIJHAW_FSR	Cu2V4C30H20N6O12	3.76058	6.72174	2.96116	-0.735415	2.22575	74	CSD						FALSE	FALSE	FALSE
qmof-5be3f38	TIJPUZ_FSR	CuC14H14N4O8	3.3247	7.27491	3.95021	-0.631631	3.31858	41	CSD						FALSE	FALSE	FALSE
qmof-9dd2a8a	TILJEE_FSR	Co2C16H16N12S4	1.21389	5.17305	3.95916	0.766713	4.72588	50	CSD						FALSE	FALSE	FALSE
qmof-50a4b12	TITHAH_FSR	Cu2C22H18I2N6O2	2.38891	5.12011	2.7312	0.372462	3.10366	52	CSD						FALSE	FALSE	FALSE
qmof-a326ecc	TIVZOO_FSR	Mn4C28H36N12O20	2.34562	5.127	2.78138	0.938228	3.7196	100	CSD						FALSE	FALSE	FALSE
qmof-1f153d6	TIYXIL01_FSR	Cu4C28H28I4N4S4	3.14563	5.59146	2.44583	0.785723	3.23156	72	CSD						FALSE	FALSE	FALSE
qmof-222a152	TIYXUX01_FSR	Cu4C28H28I4N4S4	3.02421	5.43191	2.40771	0.260669	2.66838	72	CSD						FALSE	FALSE	FALSE
qmof-ef126da	TIYYEI01_FSR	Cu4C28H28I4N4S4	3.38755	5.59437	2.20682	-0.085147	2.12167	72	CSD						FALSE	FALSE	FALSE
qmof-c398fa7	TIYYOS01_FSR	Cu4C28H28I4N4S4	3.09866	5.44627	2.34761	0.384932	2.73254	72	CSD						FALSE	FALSE	FALSE
qmof-0091bbc	TIZBIQ_FSR	Cu4Br4C28H28N4S4	2.64803	4.94843	2.3004	-1.01874	1.28166	72	CSD						FALSE	FALSE	FALSE
qmof-23be8ef	TIZBOW_FSR	Cu4Br4C28H28N4S4	3.04091	5.31457	2.27366	-0.933649	1.34001	72	CSD						FALSE	FALSE	FALSE
qmof-21a886a	TIZCIR_FSR	Cu2C16H16I2N4S4	3.48672	5.46058	1.97386	-0.909788	1.06407	44	CSD						FALSE	FALSE	FALSE
qmof-b9094ed	TIZPUP_FSR	Cu4C120H96N16O24	3.53625	6.51449	2.97825	-1.53921	1.43904	260	CSD						FALSE	FALSE	FALSE
qmof-3643545	TIZQIE_FSR	CuC30H24N4O6	3.22018	6.95382	3.73363	-1.36531	2.36832	65	CSD						FALSE	FALSE	FALSE
qmof-d856602	tobacco_bor_sym_3_mc_0_sym_4_on_14_L_13	Cu12C60H24N72Si3	3.45104	6.51933	3.06829	-5.72804	-2.65975	171	ToBaCCo						FALSE	FALSE	FALSE
qmof-204eab0	tobacco_bor_sym_3_mc_0_sym_4_on_6_L_13	Cu12C63H24N72	3.58715	6.53393	2.94678	-5.6867	-2.73991	171	ToBaCCo						FALSE	FALSE	FALSE
qmof-564af28	tobacco_SR_cut_v1-8c_Hf_1_Ch_v2-3c_pyrrole_Ch_1DoU_Ch_2x2x2	Hf6C44H44N4O32	3.37251	5.21473	1.84222	-2.68466	-0.842435	130	Anderson						FALSE	FALSE	FALSE
qmof-15f7608	tobacco_SR_cut_v1-8c_Zr_1_Ch_v2-3c_pyrrole_Ch_1DoU_Ch_2x2x2	Zr6C44H44N4O32	3.40108	5.19524	1.79416	-2.82132	-1.02716	130	Anderson						FALSE	FALSE	FALSE
qmof-747ed4e	tobacco_SR_tsd_v1-6c_Hf_1_Ch_v2-4c_B_Ch_v3-4c_B_Ch_v4-3c_triazine_Ch_1B_2SH_Ch_2x3x1	Hf6C84H66N6O32S20	3.51446	5.60551	2.09105	-3.55554	-1.46449	214	Anderson						FALSE	FALSE	FALSE
qmof-82a687d	tobacco_SR_tsd_v1-6c_Zr_1_Ch_v2-4c_B_Ch_v3-4c_B_Ch_v4-3c_triazine_Ch_1B_2SH_Ch_2x3x1	Zr6C84H66N6O32S20	3.51145	5.62963	2.11818	-3.50934	-1.39116	214	Anderson						FALSE	FALSE	FALSE
qmof-2aecb3c	tobacco_srsb_sym_3_on_0_sym_3_mc_0_L_13	Cu12C60H24N76	3.77076	6.35352	2.58276	-5.79218	-3.20942	172	ToBaCCo						FALSE	FALSE	FALSE
qmof-acb9b4e	TONQEU_FSR	Cu8C24H32I8N8	2.44623	5.02459	2.57836	1.74613	4.32449	80	CSD						FALSE	FALSE	FALSE
qmof-2888e3d	TOPPIZ_FSR	CuPdC18H18N6O2	3.40476	7.51578	4.11102	-1.88984	2.22119	46	CSD						FALSE	FALSE	FALSE
qmof-435674b	TOQGEN_FSR	Cu2Pd2C20H28N16	2.38925	6.47544	4.08619	-1.35613	2.73006	68	CSD						FALSE	FALSE	FALSE
qmof-f130ab1	TUDMAH_FSR	Ni4C72H108N20O16	1.4876	4.96343	3.47584	-0.999972	2.47586	220	CSD						FALSE	FALSE	FALSE
qmof-fc193c1	TUDMEL_FSR	Ni4C76H116N20O16	1.56156	5.05578	3.49422	-1.32476	2.16946	232	CSD						FALSE	FALSE	FALSE
qmof-7c7fd1a	TUJCAE_FSR	Cu2C30H28N4O10	2.44864	6.23031	3.78167	-2.45301	1.32866	74	CSD						FALSE	FALSE	FALSE
qmof-12d18bf	TUMKET_FSR	Cu2Pd2C32H36N20O4	5.11968	5.19457	0.074892	0.571245	0.646137	96	CSD						FALSE	FALSE	FALSE
qmof-f57add2	TUNBUB_FSR	Cu2C20H16N4O8Se4	2.87121	6.50046	3.62925	-0.294565	3.33469	54	CSD						FALSE	FALSE	FALSE
qmof-f4a5f09	TUPDIT01_FSR	Cu4C72H48N24O16	3.3502	7.22819	3.87799	-2.55583	1.32216	164	CSD						FALSE	FALSE	FALSE
qmof-5b4423d	TUYPEK_FSR	Cu2C36H26N4O12	3.09078	6.60528	3.5145	-0.766961	2.74754	80	CSD						FALSE	FALSE	FALSE
qmof-cc0269e	UBACUX_FSR	Zn8C104H64N16O36	3.69877	6.25735	2.55858	-2.79624	-0.237663	228	CSD						FALSE	FALSE	FALSE
qmof-8c2860b	UBEXEE_FSR	Cu2Mo4C26H24N4O20P2	3.3737	6.8353	3.4616	-0.371028	3.09057	82	CSD						FALSE	FALSE	FALSE
qmof-27e3cca	UCADUA_FSR	CuC26H28O8	2.73154	5.62509	2.89355	-0.824526	2.06902	63	CSD						FALSE	FALSE	FALSE
qmof-d8703ab	UCOYOA_FSR	Co2C24H24N8O8	2.28096	5.6196	3.33865	0.186301	3.52495	66	CSD						FALSE	FALSE	FALSE
qmof-277fc99	UDANAQ_FSR	Zn2C72H48N2O8	3.31118	5.34518	2.03401	-1.92473	0.10928	132	CSD						FALSE	FALSE	FALSE
qmof-28e1e79	UDOYUJ_FSR	Co4C24H24N4O12P4	2.5136	6.49024	3.97664	0.065715	4.04236	72	CSD						FALSE	FALSE	FALSE
qmof-3cfc4c8	UDUNAI_FSR	Rh4C34H38N14O16	2.42048	5.17609	2.75561	-0.855876	1.89974	106	CSD						FALSE	FALSE	FALSE
qmof-8be7b17	UFAVED_FSR	Cu2C28H28N4O12S4	2.59405	6.54116	3.94712	-1.30636	2.64076	78	CSD						FALSE	FALSE	FALSE
qmof-5f3f601	UFEZAH01_FSR	Na4C28H48N12	0.516692	2.47013	1.95344	1.97532	3.92876	92	CSD						FALSE	FALSE	FALSE
qmof-39c37e1	UFOGEE_FSR	Zn2C48H32N8O8	3.83225	6.45562	2.62337	-2.29576	0.327612	98	CSD						FALSE	FALSE	FALSE
qmof-cef46c3	UFOQEO_FSR	Zn2C48H32N8O8	3.24963	6.17871	2.92908	-3.55015	-0.621064	98	CSD						FALSE	FALSE	FALSE
qmof-826d4fe	UGAQEY_FSR	Mo8Ni8C160H128N32O32	2.65213	6.14244	3.49031	-1.91781	1.5725	368	CSD						FALSE	FALSE	FALSE
qmof-1658787	UGOREN_FSR	Ag4C52H44N12O12	2.21294	4.75751	2.54457	0.230116	2.77469	124	CSD						FALSE	FALSE	FALSE
qmof-98f79b2	UHOSUG_FSR	Cs4C24Cl8H20O24	3.78313	5.89223	2.1091	-0.001239	2.10786	80	CSD						TRUE	FALSE	FALSE
qmof-d690c9a	UHOTER_FSR	Li4C32Cl8H28O20	4.02855	6.19879	2.17024	-0.150608	2.01963	92	CSD						FALSE	FALSE	FALSE
qmof-7dd3a77	UHOTUH_FSR	Rb4C24Cl8H20O24	4.01771	6.08359	2.06588	0.015308	2.08118	80	CSD						FALSE	FALSE	FALSE
qmof-02c0106	UHUWEC_FSR	Cu4C68H52N8O20P4	3.00722	7.01598	4.00875	-2.55129	1.45747	156	CSD						FALSE	FALSE	FALSE
qmof-417cefc	UHUXAW01_FSR	Co2C28H24N8O8	2.28383	6.29104	4.00721	-1.49318	2.51403	70	CSD						FALSE	FALSE	FALSE
qmof-79ff2bd	UJERUX_FSR	Co2C40H28N2O14	3.43055	6.64114	3.21059	-0.673011	2.53758	86	CSD						FALSE	FALSE	FALSE
qmof-c312b02	UJUFEK_FSR	Cu2Mo2C30H20N6O8	3.69929	6.57349	2.8742	-0.14887	2.72533	68	CSD						FALSE	FALSE	FALSE
qmof-19e8f60	UJUMET_FSR	Cu2C34H32N4O12P4	3.06597	6.56234	3.49637	-0.530622	2.96574	88	CSD						FALSE	FALSE	FALSE
qmof-aa0100a	ULEZUI_FSR	Mn2C32H32N4O8	1.52676	4.79212	3.26536	0.363676	3.62904	78	CSD						FALSE	FALSE	FALSE
qmof-a2a082e	ULIBEY_FSR	Ni2C32H32N4O8	1.78446	5.20489	3.42043	0.061455	3.48188	78	CSD						FALSE	FALSE	FALSE
qmof-7acc00d	ULIMOT_FSR	Co2C32H24N8O12	2.71607	6.48795	3.77188	-1.68053	2.09135	78	CSD						FALSE	FALSE	FALSE
qmof-2fa85e9	ULINAG_FSR	Co2C30H24N8O10	2.36051	6.35221	3.9917	-1.91401	2.07769	74	CSD						FALSE	FALSE	FALSE
qmof-f771839	ULINIO_FSR	Co2C38H40N8O8	2.53781	6.58996	4.05215	-1.66447	2.38768	96	CSD						FALSE	FALSE	FALSE
qmof-6f5eeb5	ULUKAN_FSR	Ni4C56H48N8O24	3.11816	5.9631	2.84493	-0.88287	1.96206	140	CSD						FALSE	FALSE	FALSE
qmof-06b3283	UMAGAS_FSR	NiC28H22N8O6	2.9178	6.62633	3.70853	-0.955364	2.75316	65	CSD						FALSE	FALSE	FALSE
qmof-1278662	UMEZOB_FSR	CoC18H20N4O6	1.20799	5.2041	3.99611	0.154168	4.15027	49	CSD						FALSE	FALSE	FALSE
qmof-c3de041	UMUZUY_FSR	Ni2C16H24N4O8S4	2.17918	6.46883	4.28965	-0.249081	4.04057	58	CSD						FALSE	FALSE	FALSE
qmof-46fd06d	UPIXOH_FSR	Cu4C68H44N16O24	3.11219	6.59169	3.4795	-1.60349	1.87601	156	CSD						FALSE	FALSE	FALSE
qmof-8cdd2eb	URUJOH_FSR	Sn2C32Cl4H48O10S2	4.63038	6.88065	2.25027	-0.728688	1.52159	98	CSD						FALSE	FALSE	FALSE
qmof-cdab0e2	URUJUN_FSR	Sn4C80Cl8H64O20S4	3.95979	6.23122	2.27143	-1.46323	0.808204	180	CSD						FALSE	FALSE	FALSE
qmof-eda34e0	URUWAH_FSR	Cu8C88H64N40	3.09529	5.41453	2.31925	-2.23916	0.080087	200	CSD						FALSE	FALSE	FALSE
qmof-5c23399	USATAK_FSR	Cu4Sr2C20H24N8O26	3.00081	7.0077	4.00688	-0.906061	3.10082	84	CSD						FALSE	FALSE	FALSE
qmof-32a3837	USAWOC_FSR	Ni2C32H22N8O14	3.49409	6.14344	2.64935	-0.076944	2.5724	78	CSD						FALSE	FALSE	FALSE
qmof-59fd38f	UTEYOI_FSR	Co2Br2C34H30N8O8	2.68329	6.63117	3.94788	-0.950158	2.99772	84	CSD						FALSE	FALSE	FALSE
qmof-976a1e2	UTOQUQ_FSR	Ag4C12H20I4N4S4	3.66127	5.74693	2.08566	1.37412	3.45978	48	CSD						TRUE	FALSE	FALSE
qmof-163ccaa	UVUPIM_FSR	Cd2Br4C24H16N12	4.32481	6.78861	2.4638	-1.80102	0.662782	58	CSD						FALSE	FALSE	FALSE
qmof-391d6b2	UVUPOR_FSR	Zn6C120H72N18O24	3.89834	6.20217	2.30383	-2.97791	-0.674078	240	CSD						FALSE	FALSE	FALSE
qmof-de01c79	UVUPUX_FSR	Zn4C80H48N12O20	4.18899	6.61246	2.42347	-2.50206	-0.07859	164	CSD						FALSE	FALSE	FALSE
qmof-3254029	UWEBAB_FSR	Ni3C10Cl6H10N2	2.83942	6.67475	3.83533	0.06714	3.90247	31	CSD						FALSE	FALSE	FALSE
qmof-177ecfa	UWIMET_FSR	Ag4C16H12N12O12	3.39119	5.93934	2.54815	0.581526	3.12968	56	CSD						FALSE	FALSE	FALSE
qmof-a76ae33	UXUQIP_FSR	Ni4C20H20N20O12	3.45898	6.27257	2.81359	-0.092266	2.72132	76	CSD						FALSE	FALSE	FALSE
qmof-eab8e84	UYASET_FSR	Zn4C56H36N4O16	4.34123	6.79948	2.45826	-1.0473	1.41095	116	CSD						FALSE	FALSE	FALSE
qmof-db46c4e	UYEWIG02_FSR	Cu2C4H4N16O2	3.2338	7.5751	4.3413	-0.644448	3.69685	28	CSD						FALSE	FALSE	FALSE
qmof-850f45a	VAMKAW_FSR	Cu8C88H136N24O32	2.4382	6.33431	3.89612	-1.75298	2.14314	288	CSD						FALSE	FALSE	FALSE
qmof-6f77b06	VAMYEN01_FSR	Mn2C18Cl4H22N6O4	2.79059	5.84847	3.05787	-0.003229	3.05464	56	CSD						FALSE	FALSE	FALSE
qmof-844af13	VANGIB_FSR	Ni2C24H28O16	2.56499	5.80717	3.24218	-0.143465	3.09872	70	CSD						FALSE	FALSE	FALSE
qmof-8746f65	VANWOY_FSR	Cu2C28H28N20O8	3.23904	6.643	3.40396	-0.843482	2.56048	86	CSD						FALSE	FALSE	FALSE
qmof-9da8e10	VAQQEK_FSR	Cu2Mo8C24H22N4O26	4.07155	6.31736	2.2458	0.935858	3.18166	86	CSD						FALSE	FALSE	FALSE
qmof-ab01344	VAWGIM_FSR	CuGd2C20H28O22	2.40936	6.50626	4.0969	-1.71173	2.38517	73	CSD						FALSE	FALSE	FALSE
qmof-7abf8f7	VAWGUY_FSR	CuDy2C20H28O22	2.37689	6.48593	4.10904	-1.69829	2.41075	73	CSD						FALSE	FALSE	FALSE
qmof-fd6b778	VAWHAF_FSR	CuTb2C20H28O22	2.39921	6.48649	4.08728	-1.70263	2.38464	73	CSD						FALSE	FALSE	FALSE
qmof-73ef0e4	VAXCAZ_FSR	NiC6H8N8O4	2.27281	6.4955	4.22269	-0.437737	3.78495	27	CSD						FALSE	FALSE	FALSE
qmof-5bdd458	VAXCED_FSR	CoC6H8N8O4	2.22356	5.81107	3.58751	0.319212	3.90672	27	CSD						FALSE	FALSE	FALSE
qmof-5f3eef5	VEGYIR_FSR	Mn4C102F36H52O24	2.74068	6.07278	3.3321	-0.79918	2.53292	218	CSD						FALSE	FALSE	FALSE
qmof-a0774e6	VEHHOG01_FSR	Cu2FeC28H16N12	2.32522	5.15457	2.82936	-0.106148	2.72321	59	CSD						FALSE	FALSE	FALSE
qmof-9852a98	VEJLUU_FSR	Mn2C10Cl4H14N2O4	2.63332	5.31712	2.6838	0.411237	3.09504	36	CSD						FALSE	FALSE	FALSE
qmof-c7fbe0d	VELFOI_FSR	Cu4C36H24N16O16	2.96452	6.43703	3.47251	-1.40928	2.06324	96	CSD						FALSE	FALSE	FALSE
qmof-799305a	VEQYEY_FSR	Cu4C56H60N12O16	2.06723	5.49857	3.43133	-1.76069	1.67064	148	CSD						FALSE	FALSE	FALSE
qmof-c00d6a1	VETBAA_FSR	Mn2C40H30N10O14	2.83269	5.80544	2.97275	-0.026958	2.94579	96	CSD						FALSE	FALSE	FALSE
qmof-d45c96f	VEVFUX_FSR	Cu2Br2C8H8N4	2.9608	4.98534	2.02454	0.853496	2.87804	24	CSD						FALSE	FALSE	FALSE
qmof-d8b5d6f	VEVHEJ_FSR	Cu2Br2C46H38N2O6P2	3.56048	6.11518	2.5547	-0.357367	2.19733	98	CSD						FALSE	FALSE	FALSE
qmof-3847280	VEYXIH_FSR	Cu6C20H16I6N4S2	2.63023	4.83057	2.20034	1.99381	4.19415	54	CSD						FALSE	FALSE	FALSE
qmof-57bb27b	VIBCIV_FSR	Cu2C38H30N8O8	2.46295	6.1156	3.65265	-0.974207	2.67844	86	CSD						FALSE	FALSE	FALSE
qmof-cdc2b7e	VIJNAF_FSR	CoC16H18N4O2S2	2.94257	5.80176	2.85919	-0.109149	2.75004	43	CSD						FALSE	FALSE	FALSE
qmof-201ddfa	VILKUX_FSR	Cu2C40Cl4H32N8O16S8	3.07567	6.89982	3.82415	-1.20111	2.62304	110	CSD						FALSE	FALSE	FALSE
qmof-bb9d22a	VIMHAC_FSR	Ni2C16H24O16	2.97771	7.1817	4.20399	-1.64457	2.55941	58	CSD						FALSE	FALSE	FALSE
qmof-2959e3b	VIMXIZ_FSR	Ni3C10H22N4O18P4	3.68123	8.14743	4.4662	-0.669106	3.79709	61	CSD						FALSE	FALSE	FALSE
qmof-caff655	VIRJOW_FSR	Zn2C28H36N4O4S8	3.54019	5.73154	2.19135	-1.25876	0.932588	82	CSD						TRUE	TRUE	FALSE
qmof-dbf0b69	VITBOS_FSR	Mn4W2C28H16N24	2.98894	5.58745	2.59852	-0.112616	2.4859	74	CSD						FALSE	FALSE	FALSE
qmof-1794723	VIXBEK_FSR	Cu4C20H16I4N4S6	2.28651	4.49552	2.20901	1.03297	3.24198	54	CSD						FALSE	FALSE	FALSE
qmof-b8f1b55	VIXBIO_FSR	Cu4Br4C40H32N8S4	2.2021	4.72415	2.52205	0.676526	3.19857	92	CSD						FALSE	FALSE	FALSE
qmof-dfed9ce	VIYJOE_FSR	Ni4C88H72N12O20	3.10656	5.37308	2.26653	-0.083757	2.18277	196	CSD						FALSE	FALSE	FALSE
qmof-3f2cc61	VOBLOO_FSR	AgCu2KC40H40N6O8	1.85802	4.72993	2.87191	0.026793	2.8987	98	CSD						FALSE	FALSE	FALSE
qmof-cb7fcfc	VOBQEK_FSR	Mn3C28H28O16	2.76785	5.98388	3.21603	-0.985236	2.23079	75	CSD						FALSE	FALSE	FALSE
qmof-3465f36	VOJSUJ_FSR	Fe2C28H24N4O12	1.92447	4.97632	3.05185	0.574065	3.62591	70	CSD						FALSE	FALSE	FALSE
qmof-170efc8	VOMNIW_FSR	Ag4C44H32N12O8S4	3.19462	5.71235	2.51773	-0.124083	2.39365	104	CSD						FALSE	FALSE	FALSE
qmof-7c3b12f	VOMNOC_FSR	Ag4C72H44N24O8S8	2.85334	5.48979	2.63645	-0.239483	2.39697	160	CSD						FALSE	FALSE	FALSE
qmof-c4a4198	VOQVOO_FSR	Zn2C44H20N12O10	4.07696	6.18708	2.11012	-0.597565	1.51256	88	CSD						FALSE	FALSE	FALSE
qmof-14e4ce3	VOTWUY_FSR	CuC24H18N4O8	2.61457	6.57446	3.9599	-0.569643	3.39025	55	CSD						FALSE	FALSE	FALSE
qmof-ec1edf9	VOYTOU_FSR	Ag8C88H64N24O24	3.29433	5.9711	2.67676	-0.105583	2.57118	208	CSD						FALSE	FALSE	FALSE
qmof-2030d07	VOYVIQ_FSR	Ag4C30H26N6O12	3.16132	5.75661	2.59529	0.049238	2.64452	78	CSD						FALSE	FALSE	FALSE
qmof-0507e96	VUKHEP_FSR	Cu4C68F24H40O20	3.22083	7.10753	3.8867	-2.05153	1.83517	156	CSD						FALSE	FALSE	FALSE
qmof-5486f8c	VUKHEP01_FSR	Cu4C68F24H40O20	3.18234	7.20124	4.0189	-2.125	1.8939	156	CSD						FALSE	FALSE	FALSE
[truncated: 170 more rows]

## Sheet: Distribution Full Set
U	880	40.5717
Cu	864	39.834
Zn	407	18.7644
Ni	275	12.6787
Co	176	8.11434
B	141	6.50069
Al	87	4.01107
Mn	85	3.91886
Ag	79	3.64223
Fe	63	2.90456
Cd	46	2.12079
Mo	40	1.84417
Si	30	1.38313
Zr	29	1.33702
V	25	1.1526
K	16	0.737667
Gd	16	0.737667
Pt	15	0.691563
Y	15	0.691563
Tb	15	0.691563
Hg	14	0.645459
Sm	12	0.55325
Dy	11	0.507146
Mg	9	0.414938
Sr	9	0.414938
La	9	0.414938
Nd	9	0.414938
Na	8	0.368834
Pd	8	0.368834
Ba	8	0.368834
Li	7	0.322729
Ca	7	0.322729
Pr	7	0.322729
W	6	0.276625
Rh	6	0.276625
Au	6	0.276625
Er	5	0.230521
Pb	5	0.230521
Cs	5	0.230521
Sn	5	0.230521
Tc	5	0.230521
Ho	5	0.230521
Rb	4	0.184417
No	3	0.138313
Nb	3	0.138313
Hf	2	0.0922084
Tl	2	0.0922084
Yb	2	0.0922084
Cr	2	0.0922084
In	2	0.0922084
Ce	2	0.0922084
Ga	2	0.0922084
Re	2	0.0922084
Te	2	0.0922084
Ti	2	0.0922084
As	1	0.0461042
Bi	1	0.0461042
Ac	1	0.0461042
Ru	1	0.0461042
Eu	1	0.0461042
Os	1	0.0461042
Tm	0	0
Db	0	0
Ir	0	0
Sb	0	0
Sc	0	0
Th	0	0
Am	0	0
Be	0	0
Bh	0	0
Bk	0	0
Cf	0	0
Cm	0	0
Cn	0	0
Ds	0	0
Es	0	0
Fm	0	0
Fr	0	0
Ge	0	0
Hs	0	0
Lr	0	0
Lu	0	0
Md	0	0
Mt	0	0
Np	0	0
Pa	0	0
Pm	0	0
Po	0	0
Pu	0	0
Ra	0	0
Rf	0	0
Rg	0	0
Sg	0	0
Ta	0	0

## Sheet: MOF vs Ligand (Full)
MOF	Name	Formula	DFT					Ligand 1				Ligand 2				Ligand 3				Ligand 4				Ligand 5				Ligand 6				-	Bandgap	DIFF	-	Metal Core Type	Metal Type	Halogens	-	HOMO	LUMO	Diff
			EA	IP	Bandgap	HOMO	LUMO	HOMO	LUMO	SMILES	Ligand	HOMO	LUMO	SMILES	Ligand	HOMO	LUMO	SMILES	Ligand	HOMO	LUMO	SMILES	Ligand	HOMO	LUMO	SMILES	Ligand	HOMO	LUMO	SMILES	Ligand	-			-				-			HOMO/IP	LUMO/EA
qmof-e100550	KIBCAA_FSR	Cu4Re4C16H16N8O16	3.42073	5.86241	2.44168	0.105625	2.5473	-6.93583	-2.0719	n1ccncc1	#VALUE!	-	-	-	-	-	-	-	-	-	-	-	-	-	-	-	-	-	-	-	-	-	4.86393	2.42225	-	Double	Transition (with partially filled d-shell)	-	-	-6.93583	-2.0719	1.07342	1.34883			0	0
qmof-4d203e9	MUPKUE_FSR	Cu12C48H40I12N24	3.31928	5.72353	2.40426	1.30466	3.70892	-6.95711	-2.15354	N[n]1c(-c2ccncc2)nnc1-c1ccncc1	#VALUE!	-	-	-	-	-	-	-	-	-	-	-	-	-	-	-	-	-	-	-	-	-	4.80357	2.39932	-	Single	Transition (with partially filled d-shell)	I	-	-6.95711	-2.15354	1.23358	1.16574			5.5	5.5
qmof-6729ffe	AHUVOP_FSR	Cu4C24H20N8O8	3.45034	5.70855	2.25821	0.660785	2.919	-7.01643	-2.49308	[O-]C(c1ncc(C)nc1)=O	#VALUE!	-	-	-	-	-	-	-	-	-	-	-	-	-	-	-	-	-	-	-	-	-	4.52335	2.26514	-	Single	Transition (with partially filled d-shell)	-	-	-7.01643	-2.49308	1.30788	0.957256
qmof-49b3901	MEJCEJ_FSR	Rh4C32H32N4O16	3.35746	5.82162	2.46416	-1.40275	1.06141	-7.81637	-3.21048	N#Cc1ccc(C#N)cc1	#VALUE!	-	-	-	-	-	-	-	-	-	-	-	-	-	-	-	-	-	-	-	-	-	4.60588	2.14172	-	Single	Transition (with partially filled d-shell)	-	-	-7.81637	-3.21048	1.99474	0.146981
qmof-d6d8373	SUJVUQ_FSR	Cu4Br4C28H28N20	3.56996	5.74667	2.17672	0.307083	2.4838	-6.33266	-3.27282	C[n+]1ccc(-c2[n-]nnn2)cc1	#VALUE!	-	-	-	-	-	-	-	-	-	-	-	-	-	-	-	-	-	-	-	-	-	3.05984	0.883124	-	Single	Transition (with partially filled d-shell)	Br	-	-6.33266	-3.27282	0.585991	0.297133
qmof-303c74f	PEPVEM_FSR	Cu4Mo8C48H36N12O26	3.54247	5.77007	2.2276	0.422742	2.65035	-6.11606	-2.14445	C12=CC=CC=C1NC(C1=CC=NC=C1)=N2	#VALUE!	-	-	-	-	-	-	-	-	-	-	-	-	-	-	-	-	-	-	-	-	-	3.97161	1.74401	-	Double	Transition (with partially filled d-shell)	-	-	-6.11606	-2.14445	0.34599	1.39802
qmof-22084e3	FEXVUA_FSR	Cu4Mo8C48H32N12O26	3.74649	5.75251	2.00602	0.772948	2.77896	-6.16363	-2.52925	c1cnc(-c2c(-c3ncccc3)nc(-c3ncccc3)c(-c3ncccc3)n2)cc1	#VALUE!	-	-	-	-	-	-	-	-	-	-	-	-	-	-	-	-	-	-	-	-	-	3.63438	1.62836	-	Double	Transition (with partially filled d-shell)	-	-	-6.16363	-2.52925	0.411119	1.21725
qmof-85790cf	XAQBOI_FSR	Cu2C28Cl2H28N8O4	3.46038	5.89454	2.43416	0.345861	2.78002	-6.43732	-2.37915	c1(ccc(NC(C(Nc2ncc(C)cc2)=O)=O)nc1)C	#VALUE!	-	-	-	-	-	-	-	-	-	-	-	-	-	-	-	-	-	-	-	-	-	4.05817	1.62401	-	Single	Transition (with partially filled d-shell)	Cl	-	-6.43732	-2.37915	0.54278	1.08123
qmof-02650f9	MALQUN_FSR	Pb2C22H12I4N4O2	3.39408	5.75722	2.36313	0.482676	2.84581	-6.88669	-3.22885	C1=CC2=C(C3C(C2=O)=CC=CN=3)N=C1	#VALUE!	-	-	-	-	-	-	-	-	-	-	-	-	-	-	-	-	-	-	-	-	-	3.65784	1.2947	-	Single	Post-Transition	I	-	-6.88669	-3.22885	1.12947	0.165234
qmof-529911c	CAPQIU_FSR	Cu20C40Cl20H40N8S8	3.64121	5.95776	2.31655	1.4102	3.72675	-7.5901	-3.01325	[S-]C1C=C[NH+]=CC=1	#VALUE!	-	-	-	-	-	-	-	-	-	-	-	-	-	-	-	-	-	-	-	-	-	4.57685	2.2603	-	Single	Transition (with partially filled d-shell)	Cl	-	-7.5901	-3.01325	1.63234	0.627953
qmof-633815b	CMEPCU_FSR	Cu4C20Cl8H20N16S4	3.4352	5.76678	2.33158	1.07529	3.40687	-6.04322	-2.16399	C12N=C[NH+]=CC=1NC(=S)N2	#VALUE!	-	-	-	-	-	-	-	-	-	-	-	-	-	-	-	-	-	-	-	-	-	3.87923	1.54765	-	Single	Transition (with partially filled d-shell)	Cl	-	-6.04322	-2.16399	0.27644	1.27121
qmof-98f79b2	UHOSUG_FSR	Cs4C24Cl8H20O24	3.78313	5.89223	2.1091	-0.001239	2.10786	-6.46521	-3.91972	ClC1C([O-])=C([O-])C(Cl)=C([O-])C=1[O-]	#VALUE!	-	-	-	-	-	-	-	-	-	-	-	-	-	-	-	-	-	-	-	-	-	2.54549	0.436392	-	Single	Alkali	Cl	-	-6.46521	-3.91972	0.572982	0.13659
qmof-0162588	CISXAE_FSR	U2C44H28O14	3.64749	6.02645	2.37895	-0.35134	2.02761	-5.97913	-2.17316	[O-]C(c1c(-c2c3ccccc3ccc2C([O-])=O)c2ccccc2cc1)=O	#VALUE!	-	-	-	-	-	-	-	-	-	-	-	-	-	-	-	-	-	-	-	-	-	3.80598	1.42702	-	Single	Actinide	-	-	-5.97913	-2.17316	0.0473145	1.47434
qmof-984892e	LIQJEC_FSR	Zn12C184H144I24N48O10	3.77283	6.16597	2.39315	-2.33566	0.057491	-7.26773	-3.16161	n1ccc(-c2nc(-c3ccncc3)nc(-c3ccncc3)n2)cc1	#VALUE!	-	-	-	-	-	-	-	-	-	-	-	-	-	-	-	-	-	-	-	-	-	4.10612	1.71297	-	Single	Transition (with fully filled d-shell)	I	-	-7.26773	-3.16161	1.10176	0.611216
qmof-69ba10c	ILULOQ_FSR	Cd4C20H16I8N8O8	3.63537	5.95527	2.3199	0.244622	2.56452	-7.22074	-2.86463	c1cnc(C(O)=O)cn1	#VALUE!	-	-	-	-	-	-	-	-	-	-	-	-	-	-	-	-	-	-	-	-	-	4.35611	2.03621	-	Single	Transition (with fully filled d-shell)	I	-	-7.22074	-2.86463	1.26546	0.770749
qmof-71d890d	core_LUDVIP_freeONLY	Zn12C144H96I24N48	3.58705	5.72655	2.1395	-1.92505	0.214444	-7.2772	-3.19124	n1ccc(-c2nc(-c3ccncc3)nc(-c3ccncc3)n2)cc1	#VALUE!	-	-	-	-	-	-	-	-	-	-	-	-	-	-	-	-	-	-	-	-	-	4.08595	1.94646	-	Single	Transition (with fully filled d-shell)	I	-	-7.2772	-3.19124	1.55065	0.395806
qmof-10aa8d9	ETUKEK_FSR	Ag4C32H20N8O24	3.27734	5.7723	2.49497	-0.096052	2.39892	-7.84069	-3.5414	O=C(c1cc([N+]([O-])=O)cc([N+]([O-])=O)c1C)O	#VALUE!	-	-	-	-	-	-	-	-	-	-	-	-	-	-	-	-	-	-	-	-	-	4.29929	1.80433	-	Single	Transition (with partially filled d-shell)	-	-	-7.84069	-3.5414	2.06839	0.264064
qmof-58cb01d	KIQZIW_FSR	K4C12H12N16O24	3.75293	6.00685	2.25392	-0.647438	1.60648	-7.9168	-3.74774	[n-]1c(c(c[n]1[O-])[N+]([O-])=O)[N+](=O)[O-]	#VALUE!	-	-	-	-	-	-	-	-	-	-	-	-	-	-	-	-	-	-	-	-	-	4.16906	1.91514	-	Single	Alkali	-	-	-7.9168	-3.74774	1.90995	0.00518255
qmof-0091475	TACDIL_FSR	Tl2C12H8N2O6	3.65942	5.74782	2.0884	0.28877	2.37717	-6.7263	-3.00313	C1C=C([N+](=O)[O-])C=C([O-])C=1	#VALUE!	-	-	-	-	-	-	-	-	-	-	-	-	-	-	-	-	-	-	-	-	-	3.72317	1.63477	-	Single	Post-Transition	-	-	-6.7263	-3.00313	0.978485	0.656288
qmof-545c247	RIVBAC_FSR	Zn4C48H40I8N16	3.708	6.02245	2.31445	0.10799	2.42244	-6.47664	-2.89064	c1ncc(/C=N/N=C/c2cccnc2)cc1	#VALUE!	-	-	-	-	-	-	-	-	-	-	-	-	-	-	-	-	-	-	-	-	-	3.586	1.27155	-	Single	Transition (with fully filled d-shell)	I	-	-6.47664	-2.89064	0.454194	0.817356
qmof-1594a7d	gmof_AlO6-mofHTB_No15	AlC27H15N10O6	3.78357	5.75789	1.97433	-2.56338	-0.589054	-6.01162	-3.48597	[O-]C(=O)C1=CC=C(C2N=C3N=C(N=C4N3C(=NC(=N4)C3=CC=C(C(=O)[O-])C(N)=C3)N=2)C2=CC=C(C(=O)[O-])C(N)=C2)C=C1N	#VALUE!	-	-	-	-	-	-	-	-	-	-	-	-	-	-	-	-	-	-	-	-	-	2.52565	0.551325	-	Single	Post-Transition	-	-	-6.01162	-3.48597	0.25373	0.297595
qmof-976a1e2	UTOQUQ_FSR	Ag4C12H20I4N4S4	3.66127	5.74693	2.08566	1.37412	3.45978	-5.13874	-2.52274	CN1C(=S)C(=S)N(C)CC1	#VALUE!	-	-	-	-	-	-	-	-	-	-	-	-	-	-	-	-	-	-	-	-	-	2.616	0.530335	-	Single	Transition (with partially filled d-shell)	I	-	-5.13874	-2.52274	0.608191	1.13853
qmof-5b07106	boydwoo_str_m4_Al_o6_o6_acs_sym_102	Al6C84H50I12N12O28	3.77428	5.95655	2.18227	-2.18286	-0.000588	-5.72019	-3.04879	CNc1c(NC)c(C#CC(=O)[O-])c(c(c1C#CC(=O)[O-])I)I	#VALUE!	-	-	-	-	-	-	-	-	-	-	-	-	-	-	-	-	-	-	-	-	-	2.6714	0.489126	-	Single	Post-Transition	I	-	-5.72019	-3.04879	0.236361	0.725487
qmof-43f07bb	GASTUP_FSR	K4C24Cl4H16N4O10	3.74836	5.9177	2.16934	-0.249867	1.91947	-5.88134	-3.35865	O=NC1C=C(Cl)C=CC=1[O-]	#VALUE!	-	-	-	-	-	-	-	-	-	-	-	-	-	-	-	-	-	-	-	-	-	2.52269	0.353346	-	Single	Alkali	Cl	-	-5.88134	-3.35865	0.0363639	0.38971
qmof-35f76d8	KIJRIG_FSR	Ag4C72H68N16O12	3.22378	5.69753	2.47375	-1.28752	1.18622	-6.29391	-3.62132	N#CC(=C1C=C(C=Cc2cccnc2)CC(C1)(C)C)C#N	#VALUE!	-	-	-	-	-	-	-	-	-	-	-	-	-	-	-	-	-	-	-	-	-	2.67259	0.198847	-	Single	Transition (with partially filled d-shell)	-	-	-6.29391	-3.62132	0.596389	0.397542
qmof-0b83e38	GEBQUB01_FSR	Li8C32H56O40	3.59486	5.83007	2.23521	-0.796083	1.43913	-6.0661	-3.42268	COc1c([O-])c([O-])c(OC)c([O-])c1[O-]	#VALUE!	-	-	-	-	-	-	-	-	-	-	-	-	-	-	-	-	-	-	-	-	-	2.64342	0.408213	-	Single	Alkali	-	-	-6.0661	-3.42268	0.236028	0.172185
qmof-0454c23	SUNMOE_FSR	CoC44H32N10O6	3.26371	5.69442	2.43071	0.12024	2.55095	-5.53132	-2.71651	C1=CN=CC(/C=N/C2=C3C=CC=C(/N=C/C4C=NC=CC=4)C3=CC=C2)=C1	#VALUE!	-	-	-	-	-	-	-	-	-	-	-	-	-	-	-	-	-	-	-	-	-	2.8148	0.384089	-	Single	Transition (with partially filled d-shell)	-	-	-5.53132	-2.71651	0.163105	0.547194
qmof-3eec122	CECHAW_FSR	Cu3C120H72N24	3.64785	5.85704	2.20918	-1.31644	0.892746	-5.61273	-5.06374	n1ccc(C2C3=NC(=C(C4=NC(=C(C5=NC(=C(C6=NC=2C=C6)c2ccncc2)C=C5)c2ccncc2)C=C4)c2ccncc2)C=C3)cc1 |c:7,11,15,t:19|	#VALUE!	-	-	-	-	-	-	-	-	-	-	-	-	-	-	-	-	-	-	-	-	-	0.54899	1.66019	-	Single	Transition (with partially filled d-shell)	-	-	-5.61273	-5.06374	0.244305	1.41589
qmof-c530710	QUJJUB_FSR	Mn2C16H16O16	3.57584	5.97686	2.40102	0.568058	2.96908	-5.70914	-2.90171	[O-]C(c1c(O)cc(C([O-])=O)c(O)c1)=O	#VALUE!	-	-	-	-	-	-	-	-	-	-	-	-	-	-	-	-	-	-	-	-	-	2.80743	0.406407	-	Single	Transition (with partially filled d-shell)	-	-	-5.70914	-2.90171	0.267722	0.67413
qmof-9174c13	QEQLAC_FSR	FeHg2C34H28N14S6	3.50312	5.94903	2.44591	-0.760075	1.68583	-6.51416	-2.9689	C/C(/c1ccncc1)=N\N=C(\c1ccncc1)/C	#VALUE!	-7.74412	-5.00135	N#C[S-]	#VALUE!	-	-	-	-	-	-	-	-	-	-	-	-	-	-	-	-	-	1.51282	0.933092	-	Double	Transition (both)	-	-	-6.51416	-5.00135	0.565129	1.49822
qmof-a51b2a6	PORVUO_FSR	Zn2C52H36N4O8	3.74995	5.76404	2.01409	-1.64061	0.373481	-6.03908	-2.87023	[O-]C(c1ccc(/C=C/c2ccc(C([O-])=O)cc2)cc1)=O	#VALUE!	-7.11709	-2.46707	n1ccc(-c2ccncc2)cc1	#VALUE!	-	-	-	-	-	-	-	-	-	-	-	-	-	-	-	-	-	3.16885	1.15476	-	Single	Transition (with fully filled d-shell)	-	-	-6.03908	-2.87023	0.275036	0.879719
qmof-6842f7a	BOFGUZ_FSR	Cu8Zn8C104H64N16O48	3.5467	6.01073	2.46404	-0.887613	1.57642	-7.41799	-2.39226	[O-]C(C([O-])=O)=O	#VALUE!	-7.172	-2.51167	n1ccc(-c2ccncc2)cc1	#VALUE!	-	-	-	-	-	-	-	-	-	-	-	-	-	-	-	-	-	4.66033	2.1963	-	Double	Transition (both)	-	-	-7.172	-2.51167	1.16127	1.03503
qmof-5108c60	core_OPOZEZ_freeONLY	Cd8C232H176N32O32	3.77362	6.0095	2.23589	-2.38142	-0.145532	-6.83882	-3.13432	N(/N=C/c1ccncc1)=C\c1ccncc1	#VALUE!	-6.36929	-2.57782	[O-]C(c1cc2c(-c3ccc(C([O-])=O)cc3C2(C)C)cc1)=O	#VALUE!	-	-	-	-	-	-	-	-	-	-	-	-	-	-	-	-	-	3.23497	0.999086	-	Single	Transition (with fully filled d-shell)	-	-	-6.36929	-3.13432	0.359787	0.639299
qmof-75d2f5f	gmof_Al2O6-irmof10_B-irmof20_B_No233	Al2C24H14N2O14S2	3.43378	5.75271	2.31893	-2.70806	-0.389136	-7.40477	-3.4386	O=[N+](c1c(C([O-])=O)ccc(-c2cc([N+]([O-])=O)c(C([O-])=O)cc2)c1)[O-]	#VALUE!	-6.14624	-2.66307	[O-]C(c1c(C)c2sc(C([O-])=O)c(C)c2s1)=O	#VALUE!	-	-	-	-	-	-	-	-	-	-	-	-	-	-	-	-	-	2.70764	0.388717	-	Single	Post-Transition	-	-	-6.14624	-3.4386	0.39353	0.00481256
qmof-0f66a7d	EBIVAO_FSR	Zn2C34Cl6H18N4O6	3.56009	5.81377	2.25368	-0.636995	1.61668	-6.32997	-1.87454	[O-]C(c1c(Cl)c(Cl)cc(Cl)c1[O-])=O	#VALUE!	-7.16743	-2.47741	n1ccc(-c2ccncc2)cc1	#VALUE!	-	-	-	-	-	-	-	-	-	-	-	-	-	-	-	-	-	3.85256	1.59888	-	Single	Transition (with fully filled d-shell)	Cl	-	-6.32997	-2.47741	0.516201	1.08268
qmof-642b86d	DECWUE_FSR	Cu2C18H28N2O4P2S4	3.65607	5.69153	2.03546	0.548198	2.58366	-5.86797	-1.83993	CCO[P-]([S-])([S-])OCC	#VALUE!	-7.17483	-2.53039	n1ccc(-c2ccncc2)cc1	#VALUE!	-	-	-	-	-	-	-	-	-	-	-	-	-	-	-	-	-	3.33759	1.30213	-	Single	Transition (with partially filled d-shell)	-	-	-5.86797	-2.53039	0.176448	1.12568
qmof-3ca5d72	NESDIY_FSR	Ag4C24F12H16O12S24	3.67297	5.75793	2.08496	1.59267	3.67762	-8.76392	-1.32223	FC(S(=O)(=O)[O-])(F)F	#VALUE!	-5.49529	-2.31379	S=c1sc2SCCSc2s1	#VALUE!	-	-	-	-	-	-	-	-	-	-	-	-	-	-	-	-	-	3.1815	1.09655	-	Single	Transition (with partially filled d-shell)	F	-	-5.49529	-2.31379	0.262642	1.35919
qmof-536a1f0	LAWLEC_FSR	Zn2C32H28N4O10S4	3.7288	5.72285	1.99405	-0.023113	1.97094	-5.69589	-1.98828	[O-]C(C1SCCSC=1C([O-])=O)=O	#VALUE!	-7.16155	-2.47387	n1ccc(-c2ccncc2)cc1	#VALUE!	-	-	-	-	-	-	-	-	-	-	-	-	-	-	-	-	-	3.22202	1.22797	-	Single	Transition (with fully filled d-shell)	-	-	-5.69589	-2.47387	0.0269608	1.25493
qmof-56f4308	NEGKIW_FSR	Zn2C40H26N14O8	3.33297	5.75386	2.4209	-2.08224	0.338657	-6.85071	-3.16316	n1ccc(/C=N/N=C/c2ccncc2)cc1	#VALUE!	-6.88797	-2.71749	O=C([O-])c1cc(C(=O)[O-])cc(N=[N+]=[N-])c1	#VALUE!	-	-	-	-	-	-	-	-	-	-	-	-	-	-	-	-	-	3.68755	1.26665	-	Single	Transition (with fully filled d-shell)	-	-	-6.85071	-3.16316	1.09685	0.169805
qmof-70f59fa	RATDUO01_FSR	Ag4Fe2C36H16N12	3.73108	5.85311	2.12203	0.176661	2.29869	-9.83142	-0.365367	[C-]#N	#VALUE!	-6.52206	-3.04332	n1ccc(C#CC#Cc2ccncc2)cc1	#VALUE!	-	-	-	-	-	-	-	-	-	-	-	-	-	-	-	-	-	3.47873	1.3567	-	Double	Transition (with partially filled d-shell)	-	-	-6.52206	-3.04332	0.668944	0.687756
qmof-1ef74a7	CIDMOU_FSR	Cu4C80H56N16O12S4	3.46204	5.88838	2.42634	-1.33441	1.09193	-6.44439	-3.07527	O=S(c1cccc(-c2nc(-c3ccccn3)nnc2-c2cccc(S(=O)(=O)[O-])c2)c1)(=O)[O-]	#VALUE!	-7.19516	-2.43352	n1ccc(-c2ccncc2)cc1	#VALUE!	-	-	-	-	-	-	-	-	-	-	-	-	-	-	-	-	-	3.36912	0.942786	-	Single	Transition (with partially filled d-shell)	-	-	-6.44439	-3.07527	0.556013	0.386773
qmof-7e13f90	QANZEN_FSR	Ag4C112H84N8O8	3.49885	5.94219	2.44334	-0.557822	1.88552	-6.25057	-2.34573	n1ccc(C#Cc2ccccc2)cc1	#VALUE!	-7.03276	-0.632094	C(C(=O)[O-])([H])([H])[H]	#VALUE!	-	-	-	-	-	-	-	-	-	-	-	-	-	-	-	-	-	3.90484	1.46149	-	Single	Transition (with partially filled d-shell)	-	-	-6.25057	-2.34573	0.308377	1.15312
qmof-7998d02	gmof_Uio66Zr-irmof6_A-irmof7_A_No18	Zr6C62H40O42	3.62871	5.85261	2.2239	-1.42132	0.802587	-5.78414	-2.7074	[O-]C(c1c2CCc2c(C([O-])=O)c(O)c1O)=O	#VALUE!	-6.28684	-2.54633	[O-]C(c1c2ccccc2c(C([O-])=O)cc1)=O	#VALUE!	-	-	-	-	-	-	-	-	-	-	-	-	-	-	-	-	-	3.07674	0.852835	-	Single	Transition (with partially filled d-shell)	-	-	-5.78414	-2.7074	0.0684772	0.921313
qmof-458f21b	PUMCIL_FSR	CdC14H10N6S2	3.53017	5.83926	2.30909	-0.077665	2.23143	-6.39732	-2.82571	c1ccc(/C=N/N=C/c2cnccc2)cn1	#VALUE!	-7.63334	-4.899	N#C[S-]	#VALUE!	-	-	-	-	-	-	-	-	-	-	-	-	-	-	-	-	-	1.49831	0.810777	-	Single	Transition (with fully filled d-shell)	-	-	-6.39732	-4.899	0.55806	1.36884
qmof-d3fd7fc	KIVFUR_FSR	Zn2C48H36N8O8	3.76429	6.21791	2.45361	-0.880228	1.57339	-6.61713	-3.42341	[O-]C(c1ccc(/N=N/c2ccc(C([O-])=O)cc2)cc1)=O	#VALUE!	-6.91774	-1.26919	c1ccncc1	#VALUE!	-	-	-	-	-	-	-	-	-	-	-	-	-	-	-	-	-	3.19372	0.740107	-	Single	Transition (with fully filled d-shell)	-	-	-6.61713	-3.42341	0.399226	0.340881
qmof-d689892	EMAZAT_FSR	Ag4C24H16N16O12	3.40154	5.89825	2.49672	0.537104	3.03382	-6.48717	-2.79102	c1ncc(-c2ccc(-c3cnccn3)nn2)nc1	#VALUE!	-8.43276	-2.76237	[N+]([O-])(=O)[O-]	#VALUE!	-	-	-	-	-	-	-	-	-	-	-	-	-	-	-	-	-	3.69615	1.19943	-	Single	Transition (with partially filled d-shell)	-	-	-6.48717	-2.79102	0.588916	0.610517
qmof-9489acc	gmof_Al2O6-irmof20_B-irmof7_B_No37	Al2C20H10O14S2	3.78662	5.80254	2.01592	-1.4675	0.548419	-5.58647	-2.8043	Oc1c(O)cc2c(c(O)c(O)c(C([O-])=O)c2c1)C([O-])=O	#VALUE!	-6.42897	-2.88759	[O-]C(c1sc2cc(C([O-])=O)sc2c1)=O	#VALUE!	-	-	-	-	-	-	-	-	-	-	-	-	-	-	-	-	-	2.69888	0.682959	-	Single	Post-Transition	-	-	-5.58647	-2.88759	0.216069	0.899028
qmof-8b03127	JUXWOO_FSR	Ag4C24H16N8O12	3.78271	6.21635	2.43364	-0.075266	2.35837	-8.41548	-2.76536	[N+]([O-])(=O)[O-]	#VALUE!	-6.18798	-3.09211	c1cc2nc3ccccc3nc2cc1	#VALUE!	-	-	-	-	-	-	-	-	-	-	-	-	-	-	-	-	-	3.09587	0.662228	-	Single	Transition (with partially filled d-shell)	-	-	-6.18798	-3.09211	0.0283736	0.690602
qmof-e581c0e	core_NORJEL_freeONLY	Cd4C128H90N6O26	3.75609	5.72175	1.96566	-0.887987	1.07768	-5.34192	-2.40957	[O-]C(c1c(O)c(Cc2c3ccccc3cc(C([O-])=O)c2O)c2c(cccc2)c1)=O	#VALUE!	-6.49166	-2.77926	n1ccc(/C=C/c2ccncc2)cc1	#VALUE!	-	-	-	-	-	-	-	-	-	-	-	-	-	-	-	-	-	2.56266	0.596996	-	Single	Transition (with fully filled d-shell)	-	-	-5.34192	-2.77926	0.379829	0.976825
qmof-cafbd5e	XANBUL_FSR	Cu4C24H20N8	3.76555	5.97713	2.21158	-0.217118	1.99446	-6.51392	-2.38949	Cc1c(C)nc2c(cccc2)n1	#VALUE!	-9.84043	-0.351027	[C-]#N	#VALUE!	-	-	-	-	-	-	-	-	-	-	-	-	-	-	-	-	-	4.12443	1.91285	-	Single	Transition (with partially filled d-shell)	-	-	-6.51392	-2.38949	0.536787	1.37607
qmof-306fb3e	NAZWET_FSR	Zn2C30H24N4O8	3.45127	5.86272	2.41145	-0.809056	1.60239	-6.37476	-0.612937	[O-]C(Cc1ccc(CC([O-])=O)cc1)=O	#VALUE!	-7.01431	-3.3916	n1ccc(/N=N/c2ccncc2)cc1	#VALUE!	-	-	-	-	-	-	-	-	-	-	-	-	-	-	-	-	-	2.98316	0.571708	-	Single	Transition (with fully filled d-shell)	-	-	-6.37476	-3.3916	0.512045	0.0596637
qmof-9fa0d98	QOGTIQ_FSR	Cu4C28H16N16O4	3.3567	5.81634	2.45963	-0.235635	2.224	-8.18568	-1.9461	N#C[N-]C#N	#VALUE!	-5.52642	-2.49773	N(/N=C/c1occc1)=C\c1occc1	#VALUE!	-	-	-	-	-	-	-	-	-	-	-	-	-	-	-	-	-	3.02868	0.569049	-	Single	Transition (with partially filled d-shell)	-	-	-5.52642	-2.49773	0.28992	0.858969
qmof-6d62075	gmof_Zn2O8N2-AZO_A-irmof14_A_No372	Zn4Br8C92H48N16O16	3.73878	5.78336	2.04458	-4.19483	-2.15025	-5.32764	-2.83663	Nc1nc(N)cc(/N=N/c2c(N)c(N)ncc2)c1	#VALUE!	-6.04915	-2.78854	[O-]C(c1cc2c(cc3cc(C([O-])=O)cc4c3c2c(cc4Br)c1)Br)=O	#VALUE!	-	-	-	-	-	-	-	-	-	-	-	-	-	-	-	-	-	2.49101	0.446431	-	Single	Transition (with fully filled d-shell)	Br	-	-5.32764	-2.83663	0.455727	0.902158
qmof-cdc5769	gmof_Al2O6-AZO_B-BDC_B_No266	Al2C22H16N4O12	3.6039	5.86744	2.26354	-2.92711	-0.663571	-5.79385	-2.84174	[O-]C(c1c(O)cc(C([O-])=O)c(O)c1)=O	#VALUE!	-5.74863	-3.06033	[O-]C(c1c(N)cc(/N=N/c2cc(N)c(C([O-])=O)cc2)cc1)=O	#VALUE!	-	-	-	-	-	-	-	-	-	-	-	-	-	-	-	-	-	2.6883	0.424757	-	Single	Post-Transition	-	-	-5.74863	-3.06033	0.118811	0.543568
qmof-04459f0	AZIROQ_FSR	Zn4C60H60N8O12	3.36158	5.73155	2.36998	-0.603991	1.76598	-5.67461	-0.53386	[O-]C(C(C)NCc1c([O-])cccc1)=O	#VALUE!	-7.1649	-2.48372	n1ccc(-c2ccncc2)cc1	#VALUE!	-	-	-	-	-	-	-	-	-	-	-	-	-	-	-	-	-	3.19089	0.820914	-	Single	Transition (with fully filled d-shell)	-	-	-5.67461	-2.48372	0.0569403	0.877855
qmof-9085c0a	gmof_Uio66Zr-BDC_A-irmof7_A_No349	Zr6C52H25N5O48	3.78189	5.82443	2.04255	-1.34975	0.692792	-7.57601	-3.2205	O=[N+](c1c(C([O-])=O)ccc(C([O-])=O)c1)[O-]	#VALUE!	-5.60832	-2.72868	[O-]C(c1c2c(c(c(O)c(O)c2c(C([O-])=O)c(O)c1O)O)O)=O	#VALUE!	-	-	-	-	-	-	-	-	-	-	-	-	-	-	-	-	-	2.38783	0.345281	-	Single	Transition (with partially filled d-shell)	-	-	-5.60832	-3.2205	0.216108	0.56139
qmof-2cf73c1	XEMBUN_FSR	Au2Pt2C34Cl2H22N10	3.71985	6.02405	2.3042	0.060535	2.36474	-5.87206	-1.96061	c1cc(-c2cccc(-c3ccccn3)n2)ncc1	#VALUE!	-8.54596	-2.57276	[C-]#N	#VALUE!	-	-	-	-	-	-	-	-	-	-	-	-	-	-	-	-	-	3.2993	0.9951	-	Double	Transition (with partially filled d-shell)	Cl	-	-5.87206	-2.57276	0.151998	1.1471
qmof-00744ff	REMVUC_FSR	Zn4C24H22N22O12	3.78748	6.25415	2.46667	-0.214627	2.25204	-5.31033	-0.147023	Nc1n[nH]c(N)n1	#VALUE!	-7.88458	-3.30983	[O-][N+](c1cc(C(O)=O)cc(C(O)=O)c1)=O	#VALUE!	-	-	-	-	-	-	-	-	-	-	-	-	-	-	-	-	-	2.0005	0.466169	-	Single	Transition (with partially filled d-shell)	-	-	-5.31033	-3.30983	0.943821	0.477653
qmof-0df517f	NIHFEP_FSR	Cu4C52H36N8O4	3.58861	5.71029	2.12168	-0.137812	1.98387	-9.79567	-0.360578	C#N	#VALUE!	-6.80364	-2.65257	c1c[n]c(C(c2ccccc2)=O)cc1	#VALUE!	-	-	-	-	-	-	-	-	-	-	-	-	-	-	-	-	-	4.15107	2.02939	-	Single	Transition (with partially filled d-shell)	-	-	-6.80364	-2.65257	1.09335	0.936043
qmof-35e0b44	boydwoo_str_m5_Al_o13_o19_sra_sym_136	Al4C44F4H28O28	3.63861	5.89629	2.25768	-2.48877	-0.231089	-5.75154	-2.44255	COc1c2c(c(c(OC)c(OC)c2c(F)c(C([O-])=O)c1OC)C([O-])=O)F	#VALUE!	-7.23407	-3.37432	[O-]C(C#CC#CC([O-])=O)=O	#VALUE!	-	-	-	-	-	-	-	-	-	-	-	-	-	-	-	-	-	2.37722	0.119536	-	Single	Post-Transition	F	-	-5.75154	-3.37432	0.14475	0.264286
qmof-63e34f0	boydwoo_str_m5_Al_o20_o25_sra_sym_95	Al4C38H14N4O20	3.7651	5.93259	2.1675	-4.0282	-1.8607	-7.0074	-3.72998	[O-]C(C#CC#CC#CC([O-])=O)=O	#VALUE!	-5.74936	-1.80994	[O-]C(C#CC12C3(N)C4(N)C5(C#CC([O-])=O)C3C1(N)C5(N)C24)=O	#VALUE!	-	-	-	-	-	-	-	-	-	-	-	-	-	-	-	-	-	2.01939	0.148114	-	Single	Post-Transition	-	-	-5.74936	-3.72998	0.183234	0.0351199
qmof-05305ab	ENAQER_FSR	Cd4C72H60N20O24	3.50745	5.76468	2.25723	-1.44334	0.813885	-6.13495	-3.81422	NC1=[C-]C([n]2cncc2)=C(N)[C-]=C1[n]1cncc1	#VALUE!	-7.1176	-2.07386	O=C(NCC([O-])=O)c1cc(C(NCC([O-])=O)=O)ccc1	#VALUE!	-	-	-	-	-	-	-	-	-	-	-	-	-	-	-	-	-	2.32072	0.0634962	-	Single	Transition (with fully filled d-shell)	-	-	-6.13495	-3.81422	0.370264	0.306767
qmof-9ef6fed	gmof_Al2O6-irmof10_B-irmof7_B_No597	Al2C26H16N4O14	3.55784	5.79467	2.23684	-2.10827	0.128569	-5.69298	-2.05903	Nc1c(-c2c(N)cc(C([O-])=O)cc2)ccc(C([O-])=O)c1	#VALUE!	-7.08639	-3.56943	[O-]C(c1c([N+](=O)[O-])c([N+](=O)[O-])c(C([O-])=O)c2c1cccc2)=O	#VALUE!	-	-	-	-	-	-	-	-	-	-	-	-	-	-	-	-	-	2.12355	0.113286	-	Single	Post-Transition	-	-	-5.69298	-3.56943	0.101694	0.011592
qmof-2cfb7a7	gmof_Zn4O13-BDC_A-DPAC_A_No72	Zn8C80H40O58	3.59099	5.79261	2.20162	-4.61043	-2.40881	-5.57978	-3.28093	[O-]C(c1c(O)c(O)c(C#Cc2c(O)c(O)c(C([O-])=O)c(O)c2O)c(O)c1O)=O	#VALUE!	-7.315	-2.65793	[O-]C(c1ccc(C([O-])=O)cc1)=O	#VALUE!	-	-	-	-	-	-	-	-	-	-	-	-	-	-	-	-	-	2.29885	0.0972262	-	Single	Transition (with fully filled d-shell)	-	-	-5.57978	-3.28093	0.21283	0.310056
qmof-caff655	VIRJOW_FSR	Zn2C28H36N4O4S8	3.54019	5.73154	2.19135	-1.25876	0.932588	-6.21405	-3.92878	[S-]C(c1ccc(C([S-])=S)cc1)=S	#VALUE!	-6.71664	0.116438	N(C)(C)C=O	#VALUE!	-	-	-	-	-	-	-	-	-	-	-	-	-	-	-	-	-	2.28527	0.0939167	-	Single	Transition (with fully filled d-shell)	-	-	-6.21405	-3.92878	0.482505	0.388589
qmof-5689ec9	gmof_Al2O6-BDC_B-irmof20_B_No253	Al2C16H9N3O12S2	3.53225	5.77754	2.24529	-1.42558	0.819714	-7.7294	-3.1984	O=[N+](c1c(C([O-])=O)ccc(C([O-])=O)c1)[O-]	#VALUE!	-5.52348	-2.47787	[O-]C(c1c(N)c2sc(C([O-])=O)c(N)c2s1)=O	#VALUE!	-	-	-	-	-	-	-	-	-	-	-	-	-	-	-	-	-	2.32508	0.079784	-	Single	Post-Transition	-	-	-5.52348	-3.1984	0.254066	0.33385
qmof-c4714cc	gmof_Zn4O13-BDC_A-DPAC_A_No1256	Zn8C80H40O50	3.62787	5.71592	2.08805	-4.56661	-2.47856	-5.18315	-2.97146	[O-]C(c1c(O)c(O)c(C([O-])=O)c(O)c1O)=O	#VALUE!	-6.23976	-3.0433	[O-]C(c1c(O)cc(C#Cc2cc(O)c(C([O-])=O)c(O)c2)cc1O)=O	#VALUE!	-	-	-	-	-	-	-	-	-	-	-	-	-	-	-	-	-	2.13985	0.051797	-	Single	Transition (with fully filled d-shell)	-	-	-5.18315	-3.0433	0.532777	0.584574
qmof-cf68a4b	gmof_Al2O6-DPAC_B-irmof7_B_No970	Al2C28H16N4O14	3.74858	5.79806	2.04947	-2.45135	-0.401877	-7.11042	-3.64981	[O-]C(c1c([N+](=O)[O-])c([N+](=O)[O-])c(C([O-])=O)c2c1cccc2)=O	#VALUE!	-5.74071	-2.46051	[O-]C(c1c(N)cc(C#Cc2cc(N)c(C([O-])=O)cc2)cc1)=O	#VALUE!	-	-	-	-	-	-	-	-	-	-	-	-	-	-	-	-	-	2.0909	0.0414227	-	Single	Post-Transition	-	-	-5.74071	-3.64981	0.0573492	0.0987719
qmof-715f306	FUHNUT_FSR	Ag4C24H14N6O12	3.6348	6.0436	2.4088	0.223994	2.6328	-7.32158	-3.3454	[O-]C(c1c(C([O-])=O)c([N+]([O-])=O)ccc1)=O	#VALUE!	-6.46676	-1.95225	c1nnccc1	#VALUE!	-	-	-	-	-	-	-	-	-	-	-	-	-	-	-	-	-	3.12137	0.712564	-	Single	Transition (with partially filled d-shell)	-	-	-6.46676	-3.3454	0.423165	0.289399
qmof-4d684e3	QOJLOR_FSR	Cu2C56H36N8O10	3.43504	5.68423	2.2492	-0.009818	2.23938	-7.18713	-2.44073	C(=O)(c1ccc(C([O-])=O)cc1)[O-]	#VALUE!	-5.38924	-1.87364	c1nc2c(c3[nH]c(-c4ccc(OC)cc4)nc3c3c2nccc3)cc1	#VALUE!	-	-	-	-	-	-	-	-	-	-	-	-	-	-	-	-	-	2.94852	0.699322	-	Single	Transition (with partially filled d-shell)	-	-	-5.38924	-2.44073	0.29499	0.994313
qmof-7e9d037	BIFZAT_FSR	Ni2C40H36N6O12P4	3.64464	6.13289	2.48825	-0.61801	1.87024	-6.0403	-2.41596	c1nc(-c2nc(-c3ncccc3)c(-c3ccccn3)nc2-c2ncccc2)ccc1	#VALUE!	-6.22129	-0.683251	P(O)([O-])(Cc1ccc(CP(O)([O-])=O)cc1)=O	#VALUE!	-	-	-	-	-	-	-	-	-	-	-	-	-	-	-	-	-	3.62434	1.13609	-	Single	Transition (with partially filled d-shell)	-	-	-6.0403	-2.41596	0.0925828	1.22868
qmof-ea963b6	NEDHIN_FSR	Cu4C52H52N8O16	3.36658	5.85011	2.48354	-0.100522	2.38301	-6.88157	-2.00409	n1ccncc1	#VALUE!	-6.5669	-2.53569	[O-]c1c(/C=N/CC(=O)[O-])cccc1	#VALUE!	-	-	-	-	-	-	-	-	-	-	-	-	-	-	-	-	-	4.03121	1.54767	-	Single	Transition (with partially filled d-shell)	-	-	-6.5669	-2.53569	0.716787	0.830883
qmof-3c23f8c	FARZUU_FSR	Ni2C38H26N8O8S4	3.76419	6.25093	2.48674	-0.021237	2.46551	-7.16642	-1.80986	C([S-])#N	#VALUE!	-7.30139	-2.48386	c1nccc(C([O-])=O)c1	#VALUE!	-	-	-	-	-	-	-	-	-	-	-	-	-	-	-	-	-	4.68256	2.19582	-	Single	Transition (with partially filled d-shell)	-	-	-7.16642	-2.48386	0.915491	1.28033
qmof-cec6153	boydwoo_str_m3_o7_o22_pcu_sym_12	Zn2C40H32N2O10	3.37515	5.67572	2.30057	-4.38737	-2.0868	-6.73229	-2.70231	COC1(C2(C([O-])=O)CCC(C([O-])=O)(CC2)C1)OC	#VALUE!	-6.23906	-2.81461	[O-]C(c1ccc(C#Cc2ccc(C([O-])=O)cc2)cc1)=O	#VALUE!	-6.76949	-0.362157	n1ccc(C#Cc2ccncc2)cc1	#VALUE!	-	-	-	-	-	-	-	-	-	-	-	-	-	3.42445	1.12387	-	Single	Transition (with fully filled d-shell)	-	-	-6.23906	-2.81461	0.563334	0.560538
qmof-bd66dee	gmof_Zn2O8N2-ADC_A-irmof20_A_No421	Zn2BrC36F4H17N2O8S2	3.67525	5.82579	2.15054	-4.63756	-2.48702	-6.52611	-2.95883	Fc1nccc(/C=C/c2cc(F)ncc2)c1	#VALUE!	-6.89004	-3.09704	[O-]C(=O)c1ccc(/C=C/c2cc(F)c(C(=O)[O-])cc2)cc1F	#VALUE!	-6.35653	-3.09434	[O-]C(c1cc2sc(C([O-])=O)c(Br)c2s1)=O	#VALUE!	-	-	-	-	-	-	-	-	-	-	-	-	-	3.25949	1.10895	-	Single	Transition (with fully filled d-shell)	Br F	-	-6.35653	-3.09704	0.530742	0.578208
qmof-10cf41c	KIVDID_FSR	Cu2Sm2C34H26N6O18S2	3.54695	5.90181	2.35486	-0.029391	2.32547	-7.28846	-2.44364	[O-]C(c1nc(C([O-])=O)ccc1)=O	#VALUE!	-7.81356	-1.48895	[O-]S([O-])(=O)=O	#VALUE!	-7.16585	-2.51986	n1ccc(-c2ccncc2)cc1	#VALUE!	-	-	-	-	-	-	-	-	-	-	-	-	-	4.64599	2.29113	-	Double	Transition (with partially filled d-shell) / Lanthanide	-	-	-7.16585	-2.51986	1.26404	1.02709
qmof-0e27a4a	boydwoo_str_m3_o1_o22_pcu_sym_5	Zn2C24Cl4H22N4O8	3.58866	5.98299	2.39432	-2.55589	-0.161569	-6.07606	-1.21238	CNC1C2(C([O-])=O)CC(Cl)(Cl)C(C(Cl)C2NC)(C([O-])=O)C1Cl	#VALUE!	-7.2105	-2.55118	[O-]C(c1ccc(C([O-])=O)cc1)=O	#VALUE!	-6.79463	-1.93375	n1ccncc1	#VALUE!	-	-	-	-	-	-	-	-	-	-	-	-	-	3.52488	1.13056	-	Single	Transition (with fully filled d-shell)	Cl	-	-6.07606	-2.55118	0.0930723	1.03749
qmof-7bb0742	gmof_Zn2O8N2-BDC_A-DPAC_A_No542	Zn4C50F5H27N4O16	3.72507	6.02856	2.30349	-4.05834	-1.75485	-7.31075	-2.8086	Cc1c(C#Cc2c(C)cc(C([O-])=O)cc2)ccc(C([O-])=O)c1	#VALUE!	-7.39883	-2.2263	Fc1nccnc1	#VALUE!	-6.12466	-2.74136	[O-]C(c1cc(F)c(C([O-])=O)cc1)=O	#VALUE!	-	-	-	-	-	-	-	-	-	-	-	-	-	3.31606	1.01258	-	Single	Transition (with fully filled d-shell)	F	-	-6.12466	-2.8086	0.0961016	0.916474
qmof-8b79c84	boydwoo_str_m3_o1_o24_pcu_sym_31	Zn2C34H38N2O10	3.32977	5.70031	2.37054	-2.30492	0.065616	-6.83346	-1.95538	CCOC12C3(CC)C4(CC)C5(OCC)C3(C([O-])=O)C1(CC)C5(CC)C24C([O-])=O	#VALUE!	-7.2123	-2.52492	[O-]C(c1ccc(C([O-])=O)cc1)=O	#VALUE!	-5.94999	-0.757484	n1ccncc1	#VALUE!	-	-	-	-	-	-	-	-	-	-	-	-	-	3.42507	1.05453	-	Single	Transition (with fully filled d-shell)	-	-	-5.94999	-2.52492	0.249682	0.804853
qmof-77e8bf6	gmof_Zn2O8N2-irmof10_A-irmof20_A_No157	Zn4C61Cl6H30N4O16S6	3.60204	5.76786	2.16582	-4.01553	-1.84972	-7.3144	-2.85497	Clc1cc(-c2cc(Cl)ncc2)ccn1	#VALUE!	-6.8044	-2.92193	[O-]C(c1c(Cl)cc(-c2cc(Cl)c(C([O-])=O)cc2)cc1)=O	#VALUE!	-6.26488	-2.75072	[O-]C(c1cc2sc(C([O-])=O)c(C)c2s1)=O	#VALUE!	-	-	-	-	-	-	-	-	-	-	-	-	-	3.34295	1.17713	-	Single	Transition (with fully filled d-shell)	Cl	-	-6.26488	-2.92193	0.497024	0.680107
qmof-9997f68	boydwoo_str_m3_o7_o16_pcu_sym_118	Zn2C44H24N2O14S2	3.68172	5.79425	2.11253	-4.40434	-2.2918	-7.12936	-3.10713	[O-]C(=O)c1ccc(C#Cc2ccc(C(=O)[O-])c(S(O)(=O)=O)c2)cc1	#VALUE!	-6.57852	-2.9787	[O-]C(c1cc2c3c(ccc2cc1)c(C([O-])=O)ccc3)=O	#VALUE!	-6.19884	-2.41779	[O-]S([O-])(O)c1cc(C#Cc2ccncc2)ccn1	#VALUE!	-	-	-	-	-	-	-	-	-	-	-	-	-	3.0917	0.979173	-	Single	Transition (with fully filled d-shell)	-	-	-6.19884	-3.10713	0.404585	0.574588
qmof-e17884e	boydwoo_str_m3_o14_o18_pcu_sym_32	Zn2C43H25N3O10	3.73948	5.9074	2.16792	-2.85269	-0.684771	-6.19065	-2.26714	COc1c2ccc(C([O-])=O)c(OC)c2c2c(c3c(cc2)cc(C#N)c(C([O-])=O)c3)c1	#VALUE!	-6.12997	-2.7914	[O-]C(c1c2ccccc2c(C([O-])=O)cc1)=O	#VALUE!	-6.7509	-2.56402	c1cc2nccnc2cc1	#VALUE!	-	-	-	-	-	-	-	-	-	-	-	-	-	3.33857	1.17065	-	Single	Transition (with fully filled d-shell)	-	-	-6.12997	-2.7914	0.222565	0.948084
qmof-2446a3a	boydwoo_str_m3_o14_o25_pcu_sym_89	Zn2C34FH17N2O8	3.35322	5.73113	2.37791	-3.81059	-1.43268	-6.87627	-1.89813	[O-]C(C#CC12C3C4C5(C#CC([O-])=O)C3C1C5C24)=O	#VALUE!	-6.23043	-2.48375	[O-]C(c1c2c(cccc2c(C([O-])=O)cc1)F)=O	#VALUE!	-6.77833	-2.56663	c1cc2nccnc2cc1	#VALUE!	-	-	-	-	-	-	-	-	-	-	-	-	-	3.6638	1.28589	-	Single	Transition (with fully filled d-shell)	F	-	-6.23043	-2.56663	0.499299	0.78659
qmof-87f5303	gmof_Zn2O8N2-irmof14_A-irmof8_A_No145	Zn4C82Cl6H36N4O22	3.75216	5.836	2.08384	-3.73687	-1.65303	-6.19122	-2.8861	Clc1c2cncc3cc(Cl)c4c(c23)c(cnc4)c1	#VALUE!	-5.97043	-2.68819	[O-]C(c1cc2c(cc(C([O-])=O)cc2c(O)c1)O)=O	#VALUE!	-6.0052	-2.74215	[O-]C(c1cc2c(cc3cc(C([O-])=O)cc4c3c2c(cc4Cl)c1)Cl)=O	#VALUE!	-	-	-	-	-	-	-	-	-	-	-	-	-	3.08433	1.00049	-	Single	Transition (with fully filled d-shell)	Cl	-	-5.97043	-2.8861	0.134428	0.866061
qmof-628ac43	gmof_Zn2O8N2-BDC_A-irmof10_A_No231	Zn4C46F5H23N4O18	3.76347	6.03637	2.2729	-3.9432	-1.6703	-7.39483	-2.22216	Fc1nccnc1	#VALUE!	-6.02591	-2.51439	Oc1c(-c2c(O)cc(C([O-])=O)cc2)ccc(C([O-])=O)c1	#VALUE!	-7.26316	-2.75891	[O-]C(c1cc(F)c(C([O-])=O)cc1)=O	#VALUE!	-	-	-	-	-	-	-	-	-	-	-	-	-	3.267	0.994104	-	Single	Transition (with fully filled d-shell)	F	-	-6.02591	-2.75891	0.0104598	1.00456
qmof-063efc4	boydwoo_str_m3_o11_o16_pcu_sym_108	Zn2C30H28N2O10	3.53741	5.89882	2.3614	-2.97384	-0.612439	-7.02974	-1.82063	CCCOC(C=N)=N	#VALUE!	-6.02871	-2.73347	[O-]C(/C(/OCCC)=C/C=C/C([O-])=O)=O	#VALUE!	-6.1895	-2.36758	[O-]C(c1cc2c3c(ccc2cc1)c(C([O-])=O)ccc3)=O	#VALUE!	-	-	-	-	-	-	-	-	-	-	-	-	-	3.29525	0.933841	-	Single	Transition (with fully filled d-shell)	-	-	-6.02871	-2.73347	0.129896	0.803945
qmof-65ef97b	boydwoo_str_m3_o7_o25_pcu_sym_172	Zn2C56H34N2O10	3.53095	5.86131	2.33036	-4.71182	-2.38146	-6.01998	-1.93571	COC12C3(c4ccccc4)C4(C#CC([O-])=O)C5(OC)C3C1(C#CC([O-])=O)C5(c1ccccc1)C24	#VALUE!	-6.23566	-2.81399	[O-]C(c1ccc(C#Cc2ccc(C([O-])=O)cc2)cc1)=O	#VALUE!	-6.72633	-2.70443	n1ccc(C#Cc2ccncc2)cc1	#VALUE!	-	-	-	-	-	-	-	-	-	-	-	-	-	3.20599	0.875636	-	Single	Transition (with fully filled d-shell)	-	-	-6.01998	-2.81399	0.158669	0.716966
qmof-25a03d3	gmof_Zn2O8N2-irmof14_A-irmof20_A_No75	Zn4Br12C70H18N4O22S6	3.73731	5.96391	2.2266	-3.47412	-1.24752	-6.39947	-3.16202	Brc1c(Br)c2cncc3c(Br)c(Br)c4c(c23)c1cnc4	#VALUE!	-6.21087	-2.97706	[O-]C(c1cc2c(c(Br)c3cc(C([O-])=O)cc4c3c2c(c(c4Br)Br)c1)Br)=O	#VALUE!	-6.09758	-2.71869	[O-]C(c1c(O)c2sc(C([O-])=O)c(O)c2s1)=O	#VALUE!	-	-	-	-	-	-	-	-	-	-	-	-	-	2.93557	0.708965	-	Single	Transition (with fully filled d-shell)	Br	-	-6.09758	-3.16202	0.13367	0.575294
qmof-8bfe542	boydwoo_str_m3_o11_o18_pcu_sym_36	Zn2C28H10I8N2O8	3.58298	5.98504	2.40206	-1.67556	0.726497	-6.75999	-2.72764	I/N=C/C=N	#VALUE!	-6.60747	-2.93848	[O-]C(/C=C(\I)/C=C(\I)/C([O-])=O)=O	#VALUE!	-6.1485	-3.08245	[O-]C(c1cc2c3c(c(I)cc2c(I)c1)c1cc(C([O-])=O)c(I)c(I)c1c(I)c3)=O	#VALUE!	-	-	-	-	-	-	-	-	-	-	-	-	-	3.06604	0.663987	-	Single	Transition (with fully filled d-shell)	I	-	-6.1485	-3.08245	0.163458	0.500529
qmof-6c81e33	boydwoo_str_m3_o23_o28_pcu_sym_36	Zn2C55H45N7O12	3.55571	5.79589	2.24018	-4.73111	-2.49093	-8.55847	-0.324959	CNC1(C2(CCC(CC2)(C#CC([O-])=O)C1)C#CC([O-])=O)NC	#VALUE!	-6.40211	-3.75711	CNc1c2C(N(C(c3ccc4c(c23)c(C(N(C4=O)c2ccc(C([O-])=O)cc2)=O)c1)=O)c1ccc(C([O-])=O)cc1)=O	#VALUE!	-6.15889	-1.62564	N#CC12CCC(C#N)(CC1)CC2	#VALUE!	-	-	-	-	-	-	-	-	-	-	-	-	-	2.40179	0.161604	-	Single	Transition (with fully filled d-shell)	-	-	-6.15889	-3.75711	0.362997	0.201394
qmof-d844aae	boydwoo_str_m3_o13_o16_pcu_sym_214	Zn2C46F5H35N2O8	3.61195	5.89535	2.2834	-2.93562	-0.652216	-6.15854	-2.26859	CCc1c2c(cc(C([O-])=O)c(CC)c2c(F)c(F)c1C([O-])=O)F	#VALUE!	-6.58527	-2.44484	CCc1c2c3c(ccc2ccc1C([O-])=O)c(C([O-])=O)c(CC)c(F)c3	#VALUE!	-5.92705	-2.34943	CCc1c2cnccc2c(F)nc1	#VALUE!	-	-	-	-	-	-	-	-	-	-	-	-	-	3.48222	1.19881	-	Single	Transition (with fully filled d-shell)	F	-	-5.92705	-2.44484	0.0317009	1.16711
qmof-9931f8f	boydwoo_str_m3_o8_o22_pcu_sym_270	Zn2C37H39N11O11	3.77239	6.03224	2.25985	-4.37693	-2.11707	-6.33356	-0.618025	COC1C2(C(N)C(N)C(C(N)C2)(C([O-])=O)C1)C([O-])=O	#VALUE!	-6.38333	-3.29658	COc1c(/N=N/c2ccc(C([O-])=O)cc2)ccc(C([O-])=O)c1	#VALUE!	-5.75839	-3.04934	COc1c(/N=N/c2c(N)cncc2)cc(N)nc1	#VALUE!	-	-	-	-	-	-	-	-	-	-	-	-	-	2.46182	0.201962	-	Single	Transition (with fully filled d-shell)	-	-	-5.75839	-3.29658	0.27385	0.475812
qmof-051793e	boydwoo_str_m3_o13_o15_pcu_sym_193	Zn2C48H18I10N2O8	3.7048	5.67646	1.97166	0.589837	2.5615	-5.85995	-3.39669	Ic1c2cc(-c3ccccc3)nc(I)c2cc(-c2ccccc2)n1	#VALUE!	-6.11135	-3.15671	[O-]C(c1c2ccc(I)c(I)c2c(C([O-])=O)c2ccc(I)c(I)c12)=O	#VALUE!	-6.10651	-2.83736	[O-]C(c1c(I)c2c(cc(C([O-])=O)c(I)c2c(I)c1)I)=O	#VALUE!	-	-	-	-	-	-	-	-	-	-	-	-	-	2.46326	0.491596	-	Single	Transition (with fully filled d-shell)	I	-	-5.85995	-3.39669	0.183484	0.308112
qmof-c0f392b	DIDDIE_FSR	Zn2C44H38N6O12	3.67847	6.15572	2.47725	-3.43277	-0.955519	-6.67302	-2.12303	[O-]C(c1ccc(Oc2ccc(C([O-])=O)cc2)cc1)=O	#VALUE!	-7.05436	-3.46524	n1ccc(/N=N/c2ccncc2)cc1	#VALUE!	-6.6472	-0.123757	CN(C)C=O	#VALUE!	-	-	-	-	-	-	-	-	-	-	-	-	-	3.18196	0.70471	-	Single	Transition (with fully filled d-shell)	-	-	-6.6472	-3.46524	0.49148	0.21323
qmof-d47a2d7	core_YUPSIM_freeONLY	Pr8C96H68N20O72	3.62976	5.91972	2.28996	-0.014802	2.27515	-6.02743	-2.15237	[NH3+]c1cc(C(=O)[O-])cc(C(=O)[O-])c1	#VALUE!	-6.2999	-2.02355	Nc1cc(C(=O)[O-])cc(C(=O)[O-])c1	#VALUE!	-8.5637	-2.71752	[N+]([O-])(=O)[O-]	#VALUE!	-	-	-	-	-	-	-	-	-	-	-	-	-	3.30991	1.01996	-	Single	Lanthanide	-	-	-6.02743	-2.71752	0.107718	0.912239
qmof-d5e77c0	boydwoo_str_m7_Zn_o4_o13_bcu_sym_100	Zn4C60F4H36N16	3.4898	5.6888	2.19901	-2.31348	-0.114475	-5.45632	-1.83837	c1[n-]ncc1-c1c(F)c2ccc(-c3cn[n-]c3)cc2cc1	#VALUE!	-6.27688	-4.28071	N1[N-]C=C([C]2C(C3C=N[N-]C=3F)[CH][C]=C3C(C[C]23)F)C=1 |^1:4,12,13,17|	#VALUE!	-5.45752	-1.7516	c1[n-]ncc1-c1cc2ccc(-c3c[n-]nc3)cc2cc1	#VALUE!	-5.54223	-1.49486	c1n[n-]cc1-c1c2CCc2c(-c2c[n-]nc2)c(F)c1	#VALUE!	-	-	-	-	-	-	-	-	-	1.17561	1.02339	-	Single	Transition (with fully filled d-shell)	-	-	-5.45632	-4.28071	0.232484	0.790907
qmof-e1625e5	boydwoo_str_m5_Al_o2_o2_sra_sym_20	Al4C60Cl4H27N5O30	3.67881	5.931	2.25219	-1.82523	0.426955	-7.14648	-3.19092			-6.60576	-4.20114			-6.15769	-3.56807			-7.06266	-3.07652			-	-	-	-	-	-	-	-	-	1.95655	0.295635	-	Single	Post-Transition	Cl	-	-6.15769	-4.20114	0.226696	0.522331
qmof-cafa193	boydwoo_str_m7_Zn_o25_o25_bcu_sym_151	Zn4C72H32N24O18	3.71371	6.03085	2.31715	-4.48891	-2.17177	-6.79017	-3.68774			-5.71282	-0.810573			-6.21348	-3.27383			-6.3097	-2.88008			-	-	-	-	-	-	-	-	-	2.02507	0.292074	-	Single	Transition (with fully filled d-shell)	-	-	-5.71282	-3.68774	0.318036	0.0259627
qmof-68d0826	boydwoo_str_m5_Al_o8_o21_sra_sym_26	Al4C47H24I6N4O20	3.62375	5.86596	2.24221	-3.233	-0.99079	-6.42774	-3.10267			-6.7699	-3.55215			-6.04104	-3.39443			-6.5558	-3.53906			-	-	-	-	-	-	-	-	-	2.48889	0.246679	-	Single	Post-Transition	I	-	-6.04104	-3.55215	0.175079	0.0715995
qmof-48537be	boydwoo_str_m5_Al_o8_o26_sra_sym_165	Al4C76F14H60N6O38	3.34935	5.72382	2.37447	-3.11319	-0.73872	-5.93589	-2.88623			-6.68225	-2.90901			-6.84968	-3.79901			-6.14534	-2.84389			-	-	-	-	-	-	-	-	-	2.13688	0.23759	-	Single	Post-Transition	F	-	-5.93589	-3.79901	0.212075	0.449665
qmof-320bc35	boydwoo_str_m5_Al_o3_o27_sra_sym_25	Al4C76F16H36N8O20	3.70279	5.95336	2.25057	-3.75376	-1.5032	-6.70426	-2.9234			-5.94466	-2.40794			-5.96828	-2.51507			-6.9262	-3.71321			-	-	-	-	-	-	-	-	-	2.23144	0.0191234	-	Single	Post-Transition	F	-	-5.94466	-3.71321	0.00870164	0.0104218
qmof-250bcfe	boydwoo_str_m4_Al_o17_o25_acs_sym_46	Al6C96H42N2O32	3.57446	6.02208	2.44761	-2.92227	-0.474661	-6.8702	-1.94714			-6.27315	-3.39122			-5.79663	-2.50963			-6.24763	-3.36809			-	-	-	-	-	-	-	-	-	2.40541	0.042207	-	Single	Post-Transition	-	-	-5.79663	-3.39122	0.225449	0.183242
qmof-d535864	boydwoo_str_m7_Zn_o8_o25_bcu_sym_36	Zn4C72Cl17H27N20O12	3.72388	5.9108	2.18692	-3.99722	-1.8103	-5.87023	-1.39755	['Cl[C]1N=NC(=C1C#CC12C3C4C1C1(C2(C3C41C#CC1=C[N]N=C1)O)Cl)Cl', '', '', '']	#VALUE!	-6.49025	-3.71757	OC1=NN=C([C]1c1ccc(c(c1Cl)O)[N][N]c1cc(Cl)c(c(c1Cl)Cl)C1=C(Cl)N=N[C]1Cl)Cl	#VALUE!	-5.99554	-1.26691	OC1=NN=C[C]1C#CC12C3(O)C4C2(C2(C1(C3C42C#C[C]1C=NN=C1O)Cl)O)Cl	#VALUE!	-5.89663	-3.17345	Oc1cc(c(cc1[N][N]c1c(O)c(Cl)c(c(c1Cl)Cl)[C]1C(=NN=C1O)O)O)C1=C(Cl)[N]N=C1Cl	#VALUE!	-	-	-	-	-	-	-	-	-	2.15267	0.0342544	-	Single	Transition (with fully filled d-shell)	Cl	-	-5.87023	-3.71757	0.0405681	0.00631361
qmof-c650339	boydwoo_str_m1_o9_o11_pcu_sym_64	Zn8C90H66N2O31	3.70836	5.72545	2.01709	-3.39259	-1.3755	-6.02098	-2.37839	CCOc1cc(OCC)ccc1-c1cc(C(=O)[O-])c(-c2ccccc2)cc1C(=O)[O-]	#VALUE!	-5.98096	-2.42443	CCOc1ccc(-c2cc(C(=O)[O-])c(-c3cccc(OCC)c3)cc2C(=O)[O-])cc1	#VALUE!	-7.61892	-3.81863	C(=O)([O-])/C=C/C(=C/C([O-])=O)/C#N	#VALUE!	-6.35778	-2.82892	C(=O)([O-])/C=C/C=C(/C([O-])=O)\OCC	#VALUE!	-6.36611	-2.45406	[O-]C(=O)c1cc(-c2ccccc2)c(C(=O)[O-])cc1-c1ccccc1	#VALUE!	-	-	-	-	-	2.16233	0.145235	-	Single	Transition (with fully filled d-shell)	-	-	-5.98096	-3.81863	0.255506	0.110271
qmof-38471da	boydwoo_str_m4_Al_o6_o17_acs_sym_60	Al6C100H62N4O28	3.67147	5.76146	2.09	-2.18224	-0.092241	-6.52886	-2.94841	CCc1c(C#CC([O-])=O)c(CC)cc(C#CC([O-])=O)c1	#VALUE!	-5.8166	-2.91219	CCc1c(C#CC([O-])=O)c(NC)cc(C#CC([O-])=O)c1	#VALUE!	-5.26731	-2.4299	CNc1c2cc(C([O-])=O)cc3ccc4c(c23)c(cc(C([O-])=O)c4)c1	#VALUE!	-5.26962	-2.3186	CNc1c2cc(C([O-])=O)cc3cc(NC)c4c(c23)c(cc(C([O-])=O)c4)c1	#VALUE!	-6.78856	-3.17843	[O-]C(C#Cc1ccc(C#CC([O-])=O)cc1)=O	#VALUE!	-5.80825	-2.44124	[O-]C(c1cc2ccc3cc(C([O-])=O)cc4c3c2c(cc4)c1)=O	#VALUE!	-	2.08888	0.00111196	-	Single	Post-Transition	-	-	-5.26731	-3.17843	0.494154	0.493042
																																				Average Difference (By Metal Type)	Number of Structures (By Metal Type)					0.473145	0.67307
																																				1.29667	35
																																				0.860044	43
																																				0.778272	4
																																				0.378381	18
																																				1.01996	0

## Sheet: Distribution Selection Set
Metal	Number of Structures	Percentage of Dataset
Zn	40	38.0952
U	21	20
Cu	19	18.0952
Al	16	15.2381
Ag	9	8.57143
B	5	4.7619
Cd	5	4.7619
Ni	2	1.90476
Fe	2	1.90476
Mo	2	1.90476
Zr	2	1.90476
K	2	1.90476
Co	1	0.952381
Mn	1	0.952381
Pt	1	0.952381
Hg	1	0.952381
Sm	1	0.952381
Li	1	0.952381
Pr	1	0.952381
Rh	1	0.952381
Au	1	0.952381
Pb	1	0.952381
Cs	1	0.952381
Tl	1	0.952381
Re	1	0.952381
Si	0	0
V	0	0
Gd	0	0
Y	0	0
Tb	0	0
Dy	0	0
Mg	0	0
Sr	0	0
La	0	0
Nd	0	0
Na	0	0
Pd	0	0
Ba	0	0
Ca	0	0
W	0	0
Er	0	0
Sn	0	0
Tc	0	0
Ho	0	0
Rb	0	0
No	0	0
Nb	0	0
Hf	0	0
Yb	0	0
Cr	0	0
In	0	0
Ce	0	0
Ga	0	0
Te	0	0
Ti	0	0
As	0	0
Bi	0	0
Ac	0	0
Ru	0	0
Eu	0	0
Os	0	0
Tm	0	0
Db	0	0
Ir	0	0
Sb	0	0
Sc	0	0
Th	0	0
Am	0	0
Be	0	0
Bh	0	0
Bk	0	0
Cf	0	0
Cm	0	0
Cn	0	0
Ds	0	0
Es	0	0
Fm	0	0
Fr	0	0
Ge	0	0
Hs	0	0
Lr	0	0
Lu	0	0
Md	0	0
Mt	0	0
Np	0	0
Pa	0	0
Pm	0	0
Po	0	0
Pu	0	0
Ra	0	0
Rf	0	0
Rg	0	0
Sg	0	0
Ta	0	0

## Sheet: MOF vs Ligand (Single)
MOF	Name	Formula	DFT					Ligand 1				Bandgap	DIFF		Metal Core Type	Metal Type	Halogens		HCOOH	CH3OH	CH4		Diff
			EA	IP	Bandgap	HOMO	LUMO	HOMO	LUMO	SMILES	Ligand												HOMO/IP	LUMO/EA
qmof-e100550	KIBCAA_FSR	Cu4Re4C16H16N8O16	3.42073	5.86241	2.44168	0.105625	2.5473	-6.93583	-2.0719	n1ccncc1	#VALUE!	4.86393	2.42225		Double	Transition (with partially filled d-shell)	-		0	1	1		1.07342	1.34883
qmof-4d203e9	MUPKUE_FSR	Cu12C48H40I12N24	3.31928	5.72353	2.40426	1.30466	3.70892	-6.95711	-2.15354	N[n]1c(-c2ccncc2)nnc1-c1ccncc1	#VALUE!	4.80357	2.39932		Single	Transition (with partially filled d-shell)	I		1	1	1		1.23358	1.16574
qmof-6729ffe	AHUVOP_FSR	Cu4C24H20N8O8	3.45034	5.70855	2.25821	0.660785	2.919	-7.01643	-2.49308	[O-]C(c1ncc(C)nc1)=O	#VALUE!	4.52335	2.26514		Single	Transition (with partially filled d-shell)	-		0	1	1		1.30788	0.957256
qmof-49b3901	MEJCEJ_FSR	Rh4C32H32N4O16	3.35746	5.82162	2.46416	-1.40275	1.06141	-7.81637	-3.21048	N#Cc1ccc(C#N)cc1	#VALUE!	4.60588	2.14172		Single	Transition (with partially filled d-shell)	-		1	1	1		1.99474	0.146981
qmof-d6d8373	SUJVUQ_FSR	Cu4Br4C28H28N20	3.56996	5.74667	2.17672	0.307083	2.4838	-6.33266	-3.27282	C[n+]1ccc(-c2[n-]nnn2)cc1	#VALUE!	3.05984	0.883124		Single	Transition (with partially filled d-shell)	Br		0	1	1		0.585991	0.297133
qmof-303c74f	PEPVEM_FSR	Cu4Mo8C48H36N12O26	3.54247	5.77007	2.2276	0.422742	2.65035	-6.11606	-2.14445	C12=CC=CC=C1NC(C1=CC=NC=C1)=N2	#VALUE!	3.97161	1.74401		Double	Transition (with partially filled d-shell)	-		0	1	1		0.34599	1.39802
qmof-22084e3	FEXVUA_FSR	Cu4Mo8C48H32N12O26	3.74649	5.75251	2.00602	0.772948	2.77896	-6.16363	-2.52925	c1cnc(-c2c(-c3ncccc3)nc(-c3ncccc3)c(-c3ncccc3)n2)cc1	#VALUE!	3.63438	1.62836		Double	Transition (with partially filled d-shell)	-		0	0	1		0.411119	1.21725
qmof-85790cf	XAQBOI_FSR	Cu2C28Cl2H28N8O4	3.46038	5.89454	2.43416	0.345861	2.78002	-6.43732	-2.37915	c1(ccc(NC(C(Nc2ncc(C)cc2)=O)=O)nc1)C	#VALUE!	4.05817	1.62401		Single	Transition (with partially filled d-shell)	Cl		0	1	1		0.54278	1.08123
qmof-02650f9	MALQUN_FSR	Pb2C22H12I4N4O2	3.39408	5.75722	2.36313	0.482676	2.84581	-6.88669	-3.22885	C1=CC2=C(C3C(C2=O)=CC=CN=3)N=C1	#VALUE!	3.65784	1.2947		Single	Post-Transition	I		1	1	1		1.12947	0.165234
qmof-529911c	CAPQIU_FSR	Cu20C40Cl20H40N8S8	3.64121	5.95776	2.31655	1.4102	3.72675	-7.5901	-3.01325	[S-]C1C=C[NH+]=CC=1	#VALUE!	4.57685	2.2603		Single	Transition (with partially filled d-shell)	Cl		0	1	1		1.63234	0.627953
qmof-633815b	CMEPCU_FSR	Cu4C20Cl8H20N16S4	3.4352	5.76678	2.33158	1.07529	3.40687	-6.04322	-2.16399	C12N=C[NH+]=CC=1NC(=S)N2	#VALUE!	3.87923	1.54765		Single	Transition (with partially filled d-shell)	Cl		0	1	1		0.27644	1.27121
qmof-98f79b2	UHOSUG_FSR	Cs4C24Cl8H20O24	3.78313	5.89223	2.1091	-0.001239	2.10786	-6.46521	-3.91972	ClC1C([O-])=C([O-])C(Cl)=C([O-])C=1[O-]	#VALUE!	2.54549	0.436392		Single	Alkali	Cl		0	0	1		0.572982	0.13659
qmof-0162588	CISXAE_FSR	U2C44H28O14	3.64749	6.02645	2.37895	-0.35134	2.02761	-5.97913	-2.17316	[O-]C(c1c(-c2c3ccccc3ccc2C([O-])=O)c2ccccc2cc1)=O	#VALUE!	3.80598	1.42702		Single	Actinide	-		0	1	1		0.0473145	1.47434
qmof-984892e	LIQJEC_FSR	Zn12C184H144I24N48O10	3.77283	6.16597	2.39315	-2.33566	0.057491	-7.26773	-3.16161	n1ccc(-c2nc(-c3ccncc3)nc(-c3ccncc3)n2)cc1	#VALUE!	4.10612	1.71297		Single	Transition (with fully filled d-shell)	I		0	0	1		1.10176	0.611216
qmof-69ba10c	ILULOQ_FSR	Cd4C20H16I8N8O8	3.63537	5.95527	2.3199	0.244622	2.56452	-7.22074	-2.86463	c1cnc(C(O)=O)cn1	#VALUE!	4.35611	2.03621		Single	Transition (with fully filled d-shell)	I		0	1	1		1.26546	0.770749
qmof-71d890d	core_LUDVIP_freeONLY	Zn12C144H96I24N48	3.58705	5.72655	2.1395	-1.92505	0.214444	-7.2772	-3.19124	n1ccc(-c2nc(-c3ccncc3)nc(-c3ccncc3)n2)cc1	#VALUE!	4.08595	1.94646		Single	Transition (with fully filled d-shell)	I		0	1	1		1.55065	0.395806
qmof-10aa8d9	ETUKEK_FSR	Ag4C32H20N8O24	3.27734	5.7723	2.49497	-0.096052	2.39892	-7.84069	-3.5414	O=C(c1cc([N+]([O-])=O)cc([N+]([O-])=O)c1C)O	#VALUE!	4.29929	1.80433		Single	Transition (with partially filled d-shell)	-		1	1	1		2.06839	0.264064
qmof-58cb01d	KIQZIW_FSR	K4C12H12N16O24	3.75293	6.00685	2.25392	-0.647438	1.60648	-7.9168	-3.74774	[n-]1c(c(c[n]1[O-])[N+]([O-])=O)[N+](=O)[O-]	#VALUE!	4.16906	1.91514		Single	Alkali	-		0	0	1		1.90995	0.00518255
qmof-0091475	TACDIL_FSR	Tl2C12H8N2O6	3.65942	5.74782	2.0884	0.28877	2.37717	-6.7263	-3.00313	C1C=C([N+](=O)[O-])C=C([O-])C=1	#VALUE!	3.72317	1.63477		Single	Post-Transition	-		0	0	1		0.978485	0.656288
qmof-545c247	RIVBAC_FSR	Zn4C48H40I8N16	3.708	6.02245	2.31445	0.10799	2.42244	-6.47664	-2.89064	c1ncc(/C=N/N=C/c2cccnc2)cc1	#VALUE!	3.586	1.27155		Single	Transition (with fully filled d-shell)	I		0	0	1		0.454194	0.817356
qmof-1594a7d	gmof_AlO6-mofHTB_No15	AlC27H15N10O6	3.78357	5.75789	1.97433	-2.56338	-0.589054	-6.01162	-3.48597	[O-]C(=O)C1=CC=C(C2N=C3N=C(N=C4N3C(=NC(=N4)C3=CC=C(C(=O)[O-])C(N)=C3)N=2)C2=CC=C(C(=O)[O-])C(N)=C2)C=C1N	#VALUE!	2.52565	0.551325		Single	Post-Transition	-		0	0	1		0.25373	0.297595
qmof-976a1e2	UTOQUQ_FSR	Ag4C12H20I4N4S4	3.66127	5.74693	2.08566	1.37412	3.45978	-5.13874	-2.52274	CN1C(=S)C(=S)N(C)CC1	#VALUE!	2.616	0.530335		Single	Transition (with partially filled d-shell)	I		0	0	1		0.608191	1.13853
qmof-5b07106	boydwoo_str_m4_Al_o6_o6_acs_sym_102	Al6C84H50I12N12O28	3.77428	5.95655	2.18227	-2.18286	-0.000588	-5.72019	-3.04879	CNc1c(NC)c(C#CC(=O)[O-])c(c(c1C#CC(=O)[O-])I)I	#VALUE!	2.6714	0.489126		Single	Post-Transition	I		0	0	1		0.236361	0.725487
qmof-43f07bb	GASTUP_FSR	K4C24Cl4H16N4O10	3.74836	5.9177	2.16934	-0.249867	1.91947	-5.88134	-3.35865	O=NC1C=C(Cl)C=CC=1[O-]	#VALUE!	2.52269	0.353346		Single	Alkali	Cl		0	0	1		0.0363639	0.38971
qmof-35f76d8	KIJRIG_FSR	Ag4C72H68N16O12	3.22378	5.69753	2.47375	-1.28752	1.18622	-6.29391	-3.62132	N#CC(=C1C=C(C=Cc2cccnc2)CC(C1)(C)C)C#N	#VALUE!	2.67259	0.198847		Single	Transition (with partially filled d-shell)	-		1	1	1		0.596389	0.397542
qmof-0b83e38	GEBQUB01_FSR	Li8C32H56O40	3.59486	5.83007	2.23521	-0.796083	1.43913	-6.0661	-3.42268	COc1c([O-])c([O-])c(OC)c([O-])c1[O-]	#VALUE!	2.64342	0.408213		Single	Alkali	-		0	1	1		0.236028	0.172185
qmof-0454c23	SUNMOE_FSR	CoC44H32N10O6	3.26371	5.69442	2.43071	0.12024	2.55095	-5.53132	-2.71651	C1=CN=CC(/C=N/C2=C3C=CC=C(/N=C/C4C=NC=CC=4)C3=CC=C2)=C1	#VALUE!	2.8148	0.384089		Single	Transition (with partially filled d-shell)	-		1	1	1		0.163105	0.547194
qmof-3eec122	CECHAW_FSR	Cu3C120H72N24	3.64785	5.85704	2.20918	-1.31644	0.892746	-5.61273	-5.06374	n1ccc(C2C3=NC(=C(C4=NC(=C(C5=NC(=C(C6=NC=2C=C6)c2ccncc2)C=C5)c2ccncc2)C=C4)c2ccncc2)C=C3)cc1 |c:7,11,15,t:19|	#VALUE!	0.54899	1.66019		Single	Transition (with partially filled d-shell)	-		0	1	1		0.244305	1.41589
qmof-c530710	QUJJUB_FSR	Mn2C16H16O16	3.57584	5.97686	2.40102	0.568058	2.96908	-5.70914	-2.90171	[O-]C(c1c(O)cc(C([O-])=O)c(O)c1)=O	#VALUE!	2.80743	0.406407		Single	Transition (with partially filled d-shell)	-		0	1	1		0.267722	0.67413
																							0.797419	0.709196

## Sheet: MOF vs Ligand (Double)
MOF	Name	Formula	DFT					Ligand 1				Ligand 2				Bandgap	DIFF	-	Bandgap1	DIFF	Bandgap2	DIFF	-	Metal Core Type	Metal Type	Halogens		HCOOH	CH3OH	CH4		HOMO	LUMO	Diff
			EA	IP	Bandgap	HOMO	LUMO	HOMO	LUMO	SMILES	Ligand	HOMO	LUMO	SMILES	Ligand			-					-											HOMO/IP	LUMO/EA
qmof-9174c13	QEQLAC_FSR	FeHg2C34H28N14S6	3.50312	5.94903	2.44591	-0.760075	1.68583	-6.51416	-2.9689	C/C(/c1ccncc1)=N\N=C(\c1ccncc1)/C	#VALUE!	-7.74412	-5.00135	N#C[S-]	#VALUE!	1.51282	0.933092	-	3.54526	1.09935	2.74277	0.296863	-	Double	Transition (both)	-		0	1	1		-6.51416	-5.00135	0.565129	1.49822								0	0
qmof-a51b2a6	PORVUO_FSR	Zn2C52H36N4O8	3.74995	5.76404	2.01409	-1.64061	0.373481	-6.03908	-2.87023	[O-]C(c1ccc(/C=C/c2ccc(C([O-])=O)cc2)cc1)=O	#VALUE!	-7.11709	-2.46707	n1ccc(-c2ccncc2)cc1	#VALUE!	3.16885	1.15476	-	3.16885	1.15476	4.65002	2.63593	-	Single	Transition (with fully filled d-shell)	-		0	0	1		-6.03908	-2.87023	0.275036	0.879719
qmof-6842f7a	BOFGUZ_FSR	Cu8Zn8C104H64N16O48	3.5467	6.01073	2.46404	-0.887613	1.57642	-7.41799	-2.39226	[O-]C(C([O-])=O)=O	#VALUE!	-7.172	-2.51167	n1ccc(-c2ccncc2)cc1	#VALUE!	4.66033	2.1963	-	5.02573	2.56169	4.66033	2.1963	-	Double	Transition (both)	-		0	1	1		-7.172	-2.51167	1.16127	1.03503
qmof-5108c60	core_OPOZEZ_freeONLY	Cd8C232H176N32O32	3.77362	6.0095	2.23589	-2.38142	-0.145532	-6.83882	-3.13432	N(/N=C/c1ccncc1)=C\c1ccncc1	#VALUE!	-6.36929	-2.57782	[O-]C(c1cc2c(-c3ccc(C([O-])=O)cc3C2(C)C)cc1)=O	#VALUE!	3.23497	0.999086	-	3.70451	1.46862	3.79147	1.55559	-	Single	Transition (with fully filled d-shell)	-		0	0	1		-6.36929	-3.13432	0.359787	0.639299
qmof-75d2f5f	gmof_Al2O6-irmof10_B-irmof20_B_No233	Al2C24H14N2O14S2	3.43378	5.75271	2.31893	-2.70806	-0.389136	-7.40477	-3.4386	O=[N+](c1c(C([O-])=O)ccc(-c2cc([N+]([O-])=O)c(C([O-])=O)cc2)c1)[O-]	#VALUE!	-6.14624	-2.66307	[O-]C(c1c(C)c2sc(C([O-])=O)c(C)c2s1)=O	#VALUE!	2.70764	0.388717	-	3.96617	1.64724	3.48317	1.16424	-	Single	Post-Transition	-		0	1	1		-6.14624	-3.4386	0.39353	0.00481256
qmof-0f66a7d	EBIVAO_FSR	Zn2C34Cl6H18N4O6	3.56009	5.81377	2.25368	-0.636995	1.61668	-6.32997	-1.87454	[O-]C(c1c(Cl)c(Cl)cc(Cl)c1[O-])=O	#VALUE!	-7.16743	-2.47741	n1ccc(-c2ccncc2)cc1	#VALUE!	3.85256	1.59888	-	4.45543	2.20175	4.69002	2.43634	-	Single	Transition (with fully filled d-shell)	Cl		0	1	1		-6.32997	-2.47741	0.516201	1.08268
qmof-642b86d	DECWUE_FSR	Cu2C18H28N2O4P2S4	3.65607	5.69153	2.03546	0.548198	2.58366	-5.86797	-1.83993	CCO[P-]([S-])([S-])OCC	#VALUE!	-7.17483	-2.53039	n1ccc(-c2ccncc2)cc1	#VALUE!	3.33759	1.30213	-	4.02805	1.99259	4.64444	2.60898	-	Single	Transition (with partially filled d-shell)	-		0	0	1		-5.86797	-2.53039	0.176448	1.12568
qmof-3ca5d72	NESDIY_FSR	Ag4C24F12H16O12S24	3.67297	5.75793	2.08496	1.59267	3.67762	-8.76392	-1.32223	FC(S(=O)(=O)[O-])(F)F	#VALUE!	-5.49529	-2.31379	S=c1sc2SCCSc2s1	#VALUE!	3.1815	1.09655	-	7.44169	5.35674	3.1815	1.09655	-	Single	Transition (with partially filled d-shell)	F		0	0	1		-5.49529	-2.31379	0.262642	1.35919
qmof-536a1f0	LAWLEC_FSR	Zn2C32H28N4O10S4	3.7288	5.72285	1.99405	-0.023113	1.97094	-5.69589	-1.98828	[O-]C(C1SCCSC=1C([O-])=O)=O	#VALUE!	-7.16155	-2.47387	n1ccc(-c2ccncc2)cc1	#VALUE!	3.22202	1.22797	-	3.70761	1.71356	4.68768	2.69363	-	Single	Transition (with fully filled d-shell)	-		0	0	1		-5.69589	-2.47387	0.0269608	1.25493
qmof-56f4308	NEGKIW_FSR	Zn2C40H26N14O8	3.33297	5.75386	2.4209	-2.08224	0.338657	-6.85071	-3.16316	n1ccc(/C=N/N=C/c2ccncc2)cc1	#VALUE!	-6.88797	-2.71749	O=C([O-])c1cc(C(=O)[O-])cc(N=[N+]=[N-])c1	#VALUE!	3.68755	1.26665	-	3.68755	1.26665	4.17047	1.74958	-	Single	Transition (with fully filled d-shell)	-		1	1	1		-6.85071	-3.16316	1.09685	0.169805
qmof-70f59fa	RATDUO01_FSR	Ag4Fe2C36H16N12	3.73108	5.85311	2.12203	0.176661	2.29869	-9.83142	-0.365367	[C-]#N	#VALUE!	-6.52206	-3.04332	n1ccc(C#CC#Cc2ccncc2)cc1	#VALUE!	3.47873	1.3567	-	9.46606	7.34402	3.47873	1.3567	-	Double	Transition (with partially filled d-shell)	-		0	0	1		-6.52206	-3.04332	0.668944	0.687756
qmof-1ef74a7	CIDMOU_FSR	Cu4C80H56N16O12S4	3.46204	5.88838	2.42634	-1.33441	1.09193	-6.44439	-3.07527	O=S(c1cccc(-c2nc(-c3ccccn3)nnc2-c2cccc(S(=O)(=O)[O-])c2)c1)(=O)[O-]	#VALUE!	-7.19516	-2.43352	n1ccc(-c2ccncc2)cc1	#VALUE!	3.36912	0.942786	-	3.36912	0.942786	4.76164	2.3353	-	Single	Transition (with partially filled d-shell)	-		0	1	1		-6.44439	-3.07527	0.556013	0.386773
qmof-7e13f90	QANZEN_FSR	Ag4C112H84N8O8	3.49885	5.94219	2.44334	-0.557822	1.88552	-6.25057	-2.34573	n1ccc(C#Cc2ccccc2)cc1	#VALUE!	-7.03276	-0.632094	C(C(=O)[O-])([H])([H])[H]	#VALUE!	3.90484	1.46149	-	3.90484	1.46149	6.40067	3.95732	-	Single	Transition (with partially filled d-shell)	-		0	1	1		-6.25057	-2.34573	0.308377	1.15312
qmof-7998d02	gmof_Uio66Zr-irmof6_A-irmof7_A_No18	Zr6C62H40O42	3.62871	5.85261	2.2239	-1.42132	0.802587	-5.78414	-2.7074	[O-]C(c1c2CCc2c(C([O-])=O)c(O)c1O)=O	#VALUE!	-6.28684	-2.54633	[O-]C(c1c2ccccc2c(C([O-])=O)cc1)=O	#VALUE!	3.07674	0.852835	-	3.07674	0.852835	3.74051	1.5166	-	Single	Transition (with partially filled d-shell)	-		0	1	1		-5.78414	-2.7074	0.0684772	0.921313
qmof-458f21b	PUMCIL_FSR	CdC14H10N6S2	3.53017	5.83926	2.30909	-0.077665	2.23143	-6.39732	-2.82571	c1ccc(/C=N/N=C/c2cnccc2)cn1	#VALUE!	-7.63334	-4.899	N#C[S-]	#VALUE!	1.49831	0.810777	-	3.5716	1.26251	2.73434	0.425246	-	Single	Transition (with fully filled d-shell)	-		0	1	1		-6.39732	-4.899	0.55806	1.36884
qmof-d3fd7fc	KIVFUR_FSR	Zn2C48H36N8O8	3.76429	6.21791	2.45361	-0.880228	1.57339	-6.61713	-3.42341	[O-]C(c1ccc(/N=N/c2ccc(C([O-])=O)cc2)cc1)=O	#VALUE!	-6.91774	-1.26919	c1ccncc1	#VALUE!	3.19372	0.740107	-	3.19372	0.740107	5.64854	3.19493	-	Single	Transition (with fully filled d-shell)	-		0	0	1		-6.61713	-3.42341	0.399226	0.340881
qmof-d689892	EMAZAT_FSR	Ag4C24H16N16O12	3.40154	5.89825	2.49672	0.537104	3.03382	-6.48717	-2.79102	c1ncc(-c2ccc(-c3cnccn3)nn2)nc1	#VALUE!	-8.43276	-2.76237	[N+]([O-])(=O)[O-]	#VALUE!	3.69615	1.19943	-	3.69615	1.19943	5.67039	3.17367	-	Single	Transition (with partially filled d-shell)	-		1	1	1		-6.48717	-2.79102	0.588916	0.610517
qmof-9489acc	gmof_Al2O6-irmof20_B-irmof7_B_No37	Al2C20H10O14S2	3.78662	5.80254	2.01592	-1.4675	0.548419	-5.58647	-2.8043	Oc1c(O)cc2c(c(O)c(O)c(C([O-])=O)c2c1)C([O-])=O	#VALUE!	-6.42897	-2.88759	[O-]C(c1sc2cc(C([O-])=O)sc2c1)=O	#VALUE!	2.69888	0.682959	-	2.78218	0.766253	3.54137	1.52545	-	Single	Post-Transition	-		0	0	1		-5.58647	-2.88759	0.216069	0.899028
qmof-8b03127	JUXWOO_FSR	Ag4C24H16N8O12	3.78271	6.21635	2.43364	-0.075266	2.35837	-8.41548	-2.76536	[N+]([O-])(=O)[O-]	#VALUE!	-6.18798	-3.09211	c1cc2nc3ccccc3nc2cc1	#VALUE!	3.09587	0.662228	-	5.65012	3.21648	3.09587	0.662228	-	Single	Transition (with partially filled d-shell)	-		0	0	1		-6.18798	-3.09211	0.0283736	0.690602
qmof-e581c0e	core_NORJEL_freeONLY	Cd4C128H90N6O26	3.75609	5.72175	1.96566	-0.887987	1.07768	-5.34192	-2.40957	[O-]C(c1c(O)c(Cc2c3ccccc3cc(C([O-])=O)c2O)c2c(cccc2)c1)=O	#VALUE!	-6.49166	-2.77926	n1ccc(/C=C/c2ccncc2)cc1	#VALUE!	2.56266	0.596996	-	2.93235	0.96669	3.7124	1.74673	-	Single	Transition (with fully filled d-shell)	-		0	0	1		-5.34192	-2.77926	0.379829	0.976825
qmof-cafbd5e	XANBUL_FSR	Cu4C24H20N8	3.76555	5.97713	2.21158	-0.217118	1.99446	-6.51392	-2.38949	Cc1c(C)nc2c(cccc2)n1	#VALUE!	-9.84043	-0.351027	[C-]#N	#VALUE!	4.12443	1.91285	-	4.12443	1.91285	9.4894	7.27783	-	Single	Transition (with partially filled d-shell)	-		0	0	1		-6.51392	-2.38949	0.536787	1.37607
qmof-306fb3e	NAZWET_FSR	Zn2C30H24N4O8	3.45127	5.86272	2.41145	-0.809056	1.60239	-6.37476	-0.612937	[O-]C(Cc1ccc(CC([O-])=O)cc1)=O	#VALUE!	-7.01431	-3.3916	n1ccc(/N=N/c2ccncc2)cc1	#VALUE!	2.98316	0.571708	-	5.76182	3.35037	3.62271	1.21126	-	Single	Transition (with fully filled d-shell)	-		0	1	1		-6.37476	-3.3916	0.512045	0.0596637
qmof-9fa0d98	QOGTIQ_FSR	Cu4C28H16N16O4	3.3567	5.81634	2.45963	-0.235635	2.224	-8.18568	-1.9461	N#C[N-]C#N	#VALUE!	-5.52642	-2.49773	N(/N=C/c1occc1)=C\c1occc1	#VALUE!	3.02868	0.569049	-	6.23957	3.77994	3.02868	0.569049	-	Single	Transition (with partially filled d-shell)	-		1	1	1		-5.52642	-2.49773	0.28992	0.858969
qmof-6d62075	gmof_Zn2O8N2-AZO_A-irmof14_A_No372	Zn4Br8C92H48N16O16	3.73878	5.78336	2.04458	-4.19483	-2.15025	-5.32764	-2.83663	Nc1nc(N)cc(/N=N/c2c(N)c(N)ncc2)c1	#VALUE!	-6.04915	-2.78854	[O-]C(c1cc2c(cc3cc(C([O-])=O)cc4c3c2c(cc4Br)c1)Br)=O	#VALUE!	2.49101	0.446431	-	2.49101	0.446431	3.26061	1.21602	-	Single	Transition (with fully filled d-shell)	Br		0	0	1		-5.32764	-2.83663	0.455727	0.902158
qmof-cdc5769	gmof_Al2O6-AZO_B-BDC_B_No266	Al2C22H16N4O12	3.6039	5.86744	2.26354	-2.92711	-0.663571	-5.79385	-2.84174	[O-]C(c1c(O)cc(C([O-])=O)c(O)c1)=O	#VALUE!	-5.74863	-3.06033	[O-]C(c1c(N)cc(/N=N/c2cc(N)c(C([O-])=O)cc2)cc1)=O	#VALUE!	2.6883	0.424757	-	2.95211	0.688571	2.6883	0.424757	-	Single	Post-Transition	-		0	1	1		-5.74863	-3.06033	0.118811	0.543568
qmof-04459f0	AZIROQ_FSR	Zn4C60H60N8O12	3.36158	5.73155	2.36998	-0.603991	1.76598	-5.67461	-0.53386	[O-]C(C(C)NCc1c([O-])cccc1)=O	#VALUE!	-7.1649	-2.48372	n1ccc(-c2ccncc2)cc1	#VALUE!	3.19089	0.820914	-	5.14075	2.77077	4.68118	2.3112	-	Single	Transition (with fully filled d-shell)	-		1	1	1		-5.67461	-2.48372	0.0569403	0.877855
qmof-9085c0a	gmof_Uio66Zr-BDC_A-irmof7_A_No349	Zr6C52H25N5O48	3.78189	5.82443	2.04255	-1.34975	0.692792	-7.57601	-3.2205	O=[N+](c1c(C([O-])=O)ccc(C([O-])=O)c1)[O-]	#VALUE!	-5.60832	-2.72868	[O-]C(c1c2c(c(c(O)c(O)c2c(C([O-])=O)c(O)c1O)O)O)=O	#VALUE!	2.38783	0.345281	-	4.35551	2.31296	2.87965	0.8371	-	Single	Transition (with partially filled d-shell)	-		0	0	1		-5.60832	-3.2205	0.216108	0.56139
qmof-2cf73c1	XEMBUN_FSR	Au2Pt2C34Cl2H22N10	3.71985	6.02405	2.3042	0.060535	2.36474	-5.87206	-1.96061	c1cc(-c2cccc(-c3ccccn3)n2)ncc1	#VALUE!	-8.54596	-2.57276	[C-]#N	#VALUE!	3.2993	0.9951	-	3.91145	1.60725	5.9732	3.669	-	Double	Transition (with partially filled d-shell)	Cl		0	0	1		-5.87206	-2.57276	0.151998	1.1471
qmof-00744ff	REMVUC_FSR	Zn4C24H22N22O12	3.78748	6.25415	2.46667	-0.214627	2.25204	-5.31033	-0.147023	Nc1n[nH]c(N)n1	#VALUE!	-7.88458	-3.30983	[O-][N+](c1cc(C(O)=O)cc(C(O)=O)c1)=O	#VALUE!	2.0005	0.466169	-	5.16331	2.69664	4.57475	2.10808	-	Single	Transition (with partially filled d-shell)	-		0	0	1		-5.31033	-3.30983	0.943821	0.477653
qmof-0df517f	NIHFEP_FSR	Cu4C52H36N8O4	3.58861	5.71029	2.12168	-0.137812	1.98387	-9.79567	-0.360578	C#N	#VALUE!	-6.80364	-2.65257	c1c[n]c(C(c2ccccc2)=O)cc1	#VALUE!	4.15107	2.02939	-	9.43509	7.31341	4.15107	2.02939	-	Single	Transition (with partially filled d-shell)	-		0	1	1		-6.80364	-2.65257	1.09335	0.936043
qmof-35e0b44	boydwoo_str_m5_Al_o13_o19_sra_sym_136	Al4C44F4H28O28	3.63861	5.89629	2.25768	-2.48877	-0.231089	-5.75154	-2.44255	COc1c2c(c(c(OC)c(OC)c2c(F)c(C([O-])=O)c1OC)C([O-])=O)F	#VALUE!	-7.23407	-3.37432	[O-]C(C#CC#CC([O-])=O)=O	#VALUE!	2.37722	0.119536	-	3.30899	1.05131	3.85975	1.60207	-	Single	Post-Transition	F		0	1	1		-5.75154	-3.37432	0.14475	0.264286
qmof-63e34f0	boydwoo_str_m5_Al_o20_o25_sra_sym_95	Al4C38H14N4O20	3.7651	5.93259	2.1675	-4.0282	-1.8607	-7.0074	-3.72998	[O-]C(C#CC#CC#CC([O-])=O)=O	#VALUE!	-5.74936	-1.80994	[O-]C(C#CC12C3(N)C4(N)C5(C#CC([O-])=O)C3C1(N)C5(N)C24)=O	#VALUE!	2.01939	0.148114	-	3.27742	1.10992	3.93942	1.77192	-	Single	Post-Transition	-		0	0	1		-5.74936	-3.72998	0.183234	0.0351199
qmof-05305ab	ENAQER_FSR	Cd4C72H60N20O24	3.50745	5.76468	2.25723	-1.44334	0.813885	-6.13495	-3.81422	NC1=[C-]C([n]2cncc2)=C(N)[C-]=C1[n]1cncc1	#VALUE!	-7.1176	-2.07386	O=C(NCC([O-])=O)c1cc(C(NCC([O-])=O)=O)ccc1	#VALUE!	2.32072	0.0634962	-	2.32072	0.0634962	5.04374	2.78651	-	Single	Transition (with fully filled d-shell)	-		0	1	1		-6.13495	-3.81422	0.370264	0.306767
qmof-9ef6fed	gmof_Al2O6-irmof10_B-irmof7_B_No597	Al2C26H16N4O14	3.55784	5.79467	2.23684	-2.10827	0.128569	-5.69298	-2.05903	Nc1c(-c2c(N)cc(C([O-])=O)cc2)ccc(C([O-])=O)c1	#VALUE!	-7.08639	-3.56943	[O-]C(c1c([N+](=O)[O-])c([N+](=O)[O-])c(C([O-])=O)c2c1cccc2)=O	#VALUE!	2.12355	0.113286	-	3.63395	1.39711	3.51696	1.28013	-	Single	Post-Transition	-		0	1	1		-5.69298	-3.56943	0.101694	0.011592
qmof-2cfb7a7	gmof_Zn4O13-BDC_A-DPAC_A_No72	Zn8C80H40O58	3.59099	5.79261	2.20162	-4.61043	-2.40881	-5.57978	-3.28093	[O-]C(c1c(O)c(O)c(C#Cc2c(O)c(O)c(C([O-])=O)c(O)c2O)c(O)c1O)=O	#VALUE!	-7.315	-2.65793	[O-]C(c1ccc(C([O-])=O)cc1)=O	#VALUE!	2.29885	0.0972262	-	2.29885	0.0972262	4.65707	2.45545	-	Single	Transition (with fully filled d-shell)	-		0	1	1		-5.57978	-3.28093	0.21283	0.310056
qmof-caff655	VIRJOW_FSR	Zn2C28H36N4O4S8	3.54019	5.73154	2.19135	-1.25876	0.932588	-6.21405	-3.92878	[S-]C(c1ccc(C([S-])=S)cc1)=S	#VALUE!	-6.71664	0.116438	N(C)(C)C=O	#VALUE!	2.28527	0.0939167	-	2.28527	0.0939167	6.83308	4.64173	-	Single	Transition (with fully filled d-shell)	-		0	1	1		-6.21405	-3.92878	0.482505	0.388589
qmof-5689ec9	gmof_Al2O6-BDC_B-irmof20_B_No253	Al2C16H9N3O12S2	3.53225	5.77754	2.24529	-1.42558	0.819714	-7.7294	-3.1984	O=[N+](c1c(C([O-])=O)ccc(C([O-])=O)c1)[O-]	#VALUE!	-5.52348	-2.47787	[O-]C(c1c(N)c2sc(C([O-])=O)c(N)c2s1)=O	#VALUE!	2.32508	0.079784	-	4.531	2.2857	3.04561	0.800315	-	Single	Post-Transition	-		0	1	1		-5.52348	-3.1984	0.254066	0.33385
qmof-c4714cc	gmof_Zn4O13-BDC_A-DPAC_A_No1256	Zn8C80H40O50	3.62787	5.71592	2.08805	-4.56661	-2.47856	-5.18315	-2.97146	[O-]C(c1c(O)c(O)c(C([O-])=O)c(O)c1O)=O	#VALUE!	-6.23976	-3.0433	[O-]C(c1c(O)cc(C#Cc2cc(O)c(C([O-])=O)c(O)c2)cc1O)=O	#VALUE!	2.13985	0.051797	-	2.21169	0.123635	3.19647	1.10842	-	Single	Transition (with fully filled d-shell)	-		0	1	1		-5.18315	-3.0433	0.532777	0.584574
qmof-cf68a4b	gmof_Al2O6-DPAC_B-irmof7_B_No970	Al2C28H16N4O14	3.74858	5.79806	2.04947	-2.45135	-0.401877	-7.11042	-3.64981	[O-]C(c1c([N+](=O)[O-])c([N+](=O)[O-])c(C([O-])=O)c2c1cccc2)=O	#VALUE!	-5.74071	-2.46051	[O-]C(c1c(N)cc(C#Cc2cc(N)c(C([O-])=O)cc2)cc1)=O	#VALUE!	2.0909	0.0414227	-	3.46061	1.41114	3.2802	1.23072	-	Single	Post-Transition	-		0	0	1		-5.74071	-3.64981	0.0573492	0.0987719
qmof-715f306	FUHNUT_FSR	Ag4C24H14N6O12	3.6348	6.0436	2.4088	0.223994	2.6328	-7.32158	-3.3454	[O-]C(c1c(C([O-])=O)c([N+]([O-])=O)ccc1)=O	#VALUE!	-6.46676	-1.95225	c1nnccc1	#VALUE!	3.97618	1.56738	-	3.97618	1.56738	4.51451	2.10571	-	Single	Transition (with partially filled d-shell)	-		0	1	1		-6.46676	-3.3454	0.423165	0.289399
qmof-4d684e3	QOJLOR_FSR	Cu2C56H36N8O10	3.43504	5.68423	2.2492	-0.009818	2.23938	-7.18713	-2.44073	C(=O)(c1ccc(C([O-])=O)cc1)[O-]	#VALUE!	-5.38924	-1.87364	c1nc2c(c3[nH]c(-c4ccc(OC)cc4)nc3c3c2nccc3)cc1	#VALUE!	4.7464	2.49721	-	4.7464	2.49721	3.5156	1.26641	-	Single	Transition (with partially filled d-shell)	-		0	1	1		-5.38924	-2.44073	0.29499	0.994313
qmof-7e9d037	BIFZAT_FSR	Ni2C40H36N6O12P4	3.64464	6.13289	2.48825	-0.61801	1.87024	-6.0403	-2.41596	c1nc(-c2nc(-c3ncccc3)c(-c3ccccn3)nc2-c2ncccc2)ccc1	#VALUE!	-6.22129	-0.683251	P(O)([O-])(Cc1ccc(CP(O)([O-])=O)cc1)=O	#VALUE!	3.62434	1.13609	-	3.62434	1.13609	5.53804	3.04979	-	Single	Transition (with partially filled d-shell)	-		0	1	1		-6.0403	-2.41596	0.0925828	1.22868
qmof-ea963b6	NEDHIN_FSR	Cu4C52H52N8O16	3.36658	5.85011	2.48354	-0.100522	2.38301	-6.88157	-2.00409	n1ccncc1	#VALUE!	-6.5669	-2.53569	[O-]c1c(/C=N/CC(=O)[O-])cccc1	#VALUE!	4.87748	2.39394	-	4.87748	2.39394	4.03121	1.54767	-	Single	Transition (with partially filled d-shell)	-		1	1	1		-6.5669	-2.53569	0.716787	0.830883
qmof-3c23f8c	FARZUU_FSR	Ni2C38H26N8O8S4	3.76419	6.25093	2.48674	-0.021237	2.46551	-7.16642	-1.80986	C([S-])#N	#VALUE!	-7.30139	-2.48386	c1nccc(C([O-])=O)c1	#VALUE!	5.35656	2.86982	-	5.35656	2.86982	4.81753	2.33079	-	Single	Transition (with partially filled d-shell)	-		0	0	1		-7.16642	-2.48386	0.915491	1.28033
					1.96566																													0.40373	0.722334

## Sheet: MOF vs Ligand (Triple)
MOF	Name	Formula	DFT					Ligand 1				Ligand 2				Ligand 3				Bandgap	DIFF		Bandgap1	DIFF	Bandgap2	DIFF	Bandgap3	DIFF		Metal Core Type	Metal Type	Halogens		HCOOH	CH3OH	CH4		HOMO	LUMO	Diff
			EA	IP	Bandgap	HOMO	LUMO	HOMO	LUMO	SMILES	Ligand	HOMO	LUMO	SMILES	Ligand	HOMO	LUMO	SMILES	Ligand																					HOMO/IP	LUMO/EA
qmof-cec6153	boydwoo_str_m3_o7_o22_pcu_sym_12	Zn2C40H32N2O10	3.37515	5.67572	2.30057	-4.38737	-2.0868	-6.73229	-2.70231	COC1(C2(C([O-])=O)CCC(C([O-])=O)(CC2)C1)OC	#VALUE!	-6.23906	-2.81461	[O-]C(c1ccc(C#Cc2ccc(C([O-])=O)cc2)cc1)=O	#VALUE!	-6.76949	-0.362157	n1ccc(C#Cc2ccncc2)cc1	#VALUE!	3.42445	1.12387		4.02998	1.72941	3.42445	1.12387	6.40733	4.10676		Single	Transition (with fully filled d-shell)	-		1	1	1		-6.23906	-2.81461	0.563334	0.560538						5.5	5.5
qmof-bd66dee	gmof_Zn2O8N2-ADC_A-irmof20_A_No421	Zn2BrC36F4H17N2O8S2	3.67525	5.82579	2.15054	-4.63756	-2.48702	-6.52611	-2.95883	Fc1nccc(/C=C/c2cc(F)ncc2)c1	#VALUE!	-6.89004	-3.09704	[O-]C(=O)c1ccc(/C=C/c2cc(F)c(C(=O)[O-])cc2)cc1F	#VALUE!	-6.35653	-3.09434	[O-]C(c1cc2sc(C([O-])=O)c(Br)c2s1)=O	#VALUE!	3.25949	1.10895		3.56728	1.41674	3.793	1.64246	3.26218	1.11164		Single	Transition (with fully filled d-shell)	Br F		0	0	1		-6.35653	-3.09704	0.530742	0.578208
qmof-10cf41c	KIVDID_FSR	Cu2Sm2C34H26N6O18S2	3.54695	5.90181	2.35486	-0.029391	2.32547	-7.28846	-2.44364	[O-]C(c1nc(C([O-])=O)ccc1)=O	#VALUE!	-7.81356	-1.48895	[O-]S([O-])(=O)=O	#VALUE!	-7.16585	-2.51986	n1ccc(-c2ccncc2)cc1	#VALUE!	4.64599	2.29113		4.84483	2.48997	6.32461	3.96975	4.64599	2.29113		Double	Transition (with partially filled d-shell) / Lanthanide	-		0	1	1		-7.16585	-2.51986	1.26404	1.02709
qmof-0e27a4a	boydwoo_str_m3_o1_o22_pcu_sym_5	Zn2C24Cl4H22N4O8	3.58866	5.98299	2.39432	-2.55589	-0.161569	-6.07606	-1.21238	CNC1C2(C([O-])=O)CC(Cl)(Cl)C(C(Cl)C2NC)(C([O-])=O)C1Cl	#VALUE!	-7.2105	-2.55118	[O-]C(c1ccc(C([O-])=O)cc1)=O	#VALUE!	-6.79463	-1.93375	n1ccncc1	#VALUE!	3.52488	1.13056		4.86368	2.46936	4.65933	2.265	4.86088	2.46656		Single	Transition (with fully filled d-shell)	Cl		0	1	1		-6.07606	-2.55118	0.0930723	1.03749
qmof-7bb0742	gmof_Zn2O8N2-BDC_A-DPAC_A_No542	Zn4C50F5H27N4O16	3.72507	6.02856	2.30349	-4.05834	-1.75485	-7.31075	-2.8086	Cc1c(C#Cc2c(C)cc(C([O-])=O)cc2)ccc(C([O-])=O)c1	#VALUE!	-7.39883	-2.2263	Fc1nccnc1	#VALUE!	-6.12466	-2.74136	[O-]C(c1cc(F)c(C([O-])=O)cc1)=O	#VALUE!	3.31606	1.01258		4.50215	2.19867	5.17253	2.86905	3.3833	1.07982		Single	Transition (with fully filled d-shell)	F		0	0	1		-6.12466	-2.8086	0.0961016	0.916474
qmof-8b79c84	boydwoo_str_m3_o1_o24_pcu_sym_31	Zn2C34H38N2O10	3.32977	5.70031	2.37054	-2.30492	0.065616	-6.83346	-1.95538	CCOC12C3(CC)C4(CC)C5(OCC)C3(C([O-])=O)C1(CC)C5(CC)C24C([O-])=O	#VALUE!	-7.2123	-2.52492	[O-]C(c1ccc(C([O-])=O)cc1)=O	#VALUE!	-5.94999	-0.757484	n1ccncc1	#VALUE!	3.42507	1.05453		4.87808	2.50754	4.68738	2.31684	5.19251	2.82197		Single	Transition (with fully filled d-shell)	-		1	1	1		-5.94999	-2.52492	0.249682	0.804853
qmof-77e8bf6	gmof_Zn2O8N2-irmof10_A-irmof20_A_No157	Zn4C61Cl6H30N4O16S6	3.60204	5.76786	2.16582	-4.01553	-1.84972	-7.3144	-2.85497	Clc1cc(-c2cc(Cl)ncc2)ccn1	#VALUE!	-6.8044	-2.92193	[O-]C(c1c(Cl)cc(-c2cc(Cl)c(C([O-])=O)cc2)cc1)=O	#VALUE!	-6.26488	-2.75072	[O-]C(c1cc2sc(C([O-])=O)c(C)c2s1)=O	#VALUE!	3.34295	1.17713		4.45943	2.29362	3.88247	1.71665	3.51416	1.34835		Single	Transition (with fully filled d-shell)	Cl		0	1	1		-6.26488	-2.92193	0.497024	0.680107
qmof-9997f68	boydwoo_str_m3_o7_o16_pcu_sym_118	Zn2C44H24N2O14S2	3.68172	5.79425	2.11253	-4.40434	-2.2918	-7.12936	-3.10713	[O-]C(=O)c1ccc(C#Cc2ccc(C(=O)[O-])c(S(O)(=O)=O)c2)cc1	#VALUE!	-6.57852	-2.9787	[O-]C(c1cc2c3c(ccc2cc1)c(C([O-])=O)ccc3)=O	#VALUE!	-6.19884	-2.41779	[O-]S([O-])(O)c1cc(C#Cc2ccncc2)ccn1	#VALUE!	3.0917	0.979173		4.02223	1.90969	3.59982	1.48729	3.78105	1.66852		Single	Transition (with fully filled d-shell)	-		0	0	1		-6.19884	-3.10713	0.404585	0.574588
qmof-e17884e	boydwoo_str_m3_o14_o18_pcu_sym_32	Zn2C43H25N3O10	3.73948	5.9074	2.16792	-2.85269	-0.684771	-6.19065	-2.26714	COc1c2ccc(C([O-])=O)c(OC)c2c2c(c3c(cc2)cc(C#N)c(C([O-])=O)c3)c1	#VALUE!	-6.12997	-2.7914	[O-]C(c1c2ccccc2c(C([O-])=O)cc1)=O	#VALUE!	-6.7509	-2.56402	c1cc2nccnc2cc1	#VALUE!	3.33857	1.17065		3.9235	1.75558	3.33857	1.17065	4.18688	2.01896		Single	Transition (with fully filled d-shell)	-		0	0	1		-6.12997	-2.7914	0.222565	0.948084
qmof-2446a3a	boydwoo_str_m3_o14_o25_pcu_sym_89	Zn2C34FH17N2O8	3.35322	5.73113	2.37791	-3.81059	-1.43268	-6.87627	-1.89813	[O-]C(C#CC12C3C4C5(C#CC([O-])=O)C3C1C5C24)=O	#VALUE!	-6.23043	-2.48375	[O-]C(c1c2c(cccc2c(C([O-])=O)cc1)F)=O	#VALUE!	-6.77833	-2.56663	c1cc2nccnc2cc1	#VALUE!	3.6638	1.28589		4.97813	2.60023	3.74668	1.36878	4.2117	1.83379		Single	Transition (with fully filled d-shell)	F		1	1	1		-6.23043	-2.56663	0.499299	0.78659
qmof-87f5303	gmof_Zn2O8N2-irmof14_A-irmof8_A_No145	Zn4C82Cl6H36N4O22	3.75216	5.836	2.08384	-3.73687	-1.65303	-6.19122	-2.8861	Clc1c2cncc3cc(Cl)c4c(c23)c(cnc4)c1	#VALUE!	-5.97043	-2.68819	[O-]C(c1cc2c(cc(C([O-])=O)cc2c(O)c1)O)=O	#VALUE!	-6.0052	-2.74215	[O-]C(c1cc2c(cc3cc(C([O-])=O)cc4c3c2c(cc4Cl)c1)Cl)=O	#VALUE!	3.08433	1.00049		3.30512	1.22128	3.28224	1.1984	3.26305	1.17921		Single	Transition (with fully filled d-shell)	Cl		0	0	1		-5.97043	-2.8861	0.134428	0.866061
qmof-628ac43	gmof_Zn2O8N2-BDC_A-irmof10_A_No231	Zn4C46F5H23N4O18	3.76347	6.03637	2.2729	-3.9432	-1.6703	-7.39483	-2.22216	Fc1nccnc1	#VALUE!	-6.02591	-2.51439	Oc1c(-c2c(O)cc(C([O-])=O)cc2)ccc(C([O-])=O)c1	#VALUE!	-7.26316	-2.75891	[O-]C(c1cc(F)c(C([O-])=O)cc1)=O	#VALUE!	3.267	0.994104		5.17267	2.89977	3.51152	1.23863	4.50425	2.23135		Single	Transition (with fully filled d-shell)	F		0	0	1		-6.02591	-2.75891	0.0104598	1.00456
qmof-063efc4	boydwoo_str_m3_o11_o16_pcu_sym_108	Zn2C30H28N2O10	3.53741	5.89882	2.3614	-2.97384	-0.612439	-7.02974	-1.82063	CCCOC(C=N)=N	#VALUE!	-6.02871	-2.73347	[O-]C(/C(/OCCC)=C/C=C/C([O-])=O)=O	#VALUE!	-6.1895	-2.36758	[O-]C(c1cc2c3c(ccc2cc1)c(C([O-])=O)ccc3)=O	#VALUE!	3.29525	0.933841		5.20911	2.8477	3.29525	0.933841	3.82192	1.46052		Single	Transition (with fully filled d-shell)	-		0	1	1		-6.02871	-2.73347	0.129896	0.803945
qmof-65ef97b	boydwoo_str_m3_o7_o25_pcu_sym_172	Zn2C56H34N2O10	3.53095	5.86131	2.33036	-4.71182	-2.38146	-6.01998	-1.93571	COC12C3(c4ccccc4)C4(C#CC([O-])=O)C5(OC)C3C1(C#CC([O-])=O)C5(c1ccccc1)C24	#VALUE!	-6.23566	-2.81399	[O-]C(c1ccc(C#Cc2ccc(C([O-])=O)cc2)cc1)=O	#VALUE!	-6.72633	-2.70443	n1ccc(C#Cc2ccncc2)cc1	#VALUE!	3.20599	0.875636		4.08427	1.75391	3.42167	1.09131	4.0219	1.69154		Single	Transition (with fully filled d-shell)	-		0	1	1		-6.01998	-2.81399	0.158669	0.716966
qmof-25a03d3	gmof_Zn2O8N2-irmof14_A-irmof20_A_No75	Zn4Br12C70H18N4O22S6	3.73731	5.96391	2.2266	-3.47412	-1.24752	-6.39947	-3.16202	Brc1c(Br)c2cncc3c(Br)c(Br)c4c(c23)c1cnc4	#VALUE!	-6.21087	-2.97706	[O-]C(c1cc2c(c(Br)c3cc(C([O-])=O)cc4c3c2c(c(c4Br)Br)c1)Br)=O	#VALUE!	-6.09758	-2.71869	[O-]C(c1c(O)c2sc(C([O-])=O)c(O)c2s1)=O	#VALUE!	2.93557	0.708965		3.23745	1.01085	3.2338	1.0072	3.37889	1.15229		Single	Transition (with fully filled d-shell)	Br		0	0	1		-6.09758	-3.16202	0.13367	0.575294
qmof-8bfe542	boydwoo_str_m3_o11_o18_pcu_sym_36	Zn2C28H10I8N2O8	3.58298	5.98504	2.40206	-1.67556	0.726497	-6.75999	-2.72764	I/N=C/C=N	#VALUE!	-6.60747	-2.93848	[O-]C(/C=C(\I)/C=C(\I)/C([O-])=O)=O	#VALUE!	-6.1485	-3.08245	[O-]C(c1cc2c3c(c(I)cc2c(I)c1)c1cc(C([O-])=O)c(I)c(I)c1c(I)c3)=O	#VALUE!	3.06604	0.663987		4.03235	1.63029	3.66899	1.26694	3.06604	0.663987		Single	Transition (with fully filled d-shell)	I		0	1	1		-6.1485	-3.08245	0.163458	0.500529
qmof-6c81e33	boydwoo_str_m3_o23_o28_pcu_sym_36	Zn2C55H45N7O12	3.55571	5.79589	2.24018	-4.73111	-2.49093	-8.55847	-0.324959	CNC1(C2(CCC(CC2)(C#CC([O-])=O)C1)C#CC([O-])=O)NC	#VALUE!	-6.40211	-3.75711	CNc1c2C(N(C(c3ccc4c(c23)c(C(N(C4=O)c2ccc(C([O-])=O)cc2)=O)c1)=O)c1ccc(C([O-])=O)cc1)=O	#VALUE!	-6.15889	-1.62564	N#CC12CCC(C#N)(CC1)CC2	#VALUE!	2.40179	0.161604		8.23352	5.99333	2.645	0.404819	4.53326	2.29307		Single	Transition (with fully filled d-shell)	-		0	1	1		-6.15889	-3.75711	0.362997	0.201394
qmof-d844aae	boydwoo_str_m3_o13_o16_pcu_sym_214	Zn2C46F5H35N2O8	3.61195	5.89535	2.2834	-2.93562	-0.652216	-6.15854	-2.26859	CCc1c2c(cc(C([O-])=O)c(CC)c2c(F)c(F)c1C([O-])=O)F	#VALUE!	-6.58527	-2.44484	CCc1c2c3c(ccc2ccc1C([O-])=O)c(C([O-])=O)c(CC)c(F)c3	#VALUE!	-5.92705	-2.34943	CCc1c2cnccc2c(F)nc1	#VALUE!	3.48222	1.19881		3.88995	1.60655	4.14043	1.85703	3.57762	1.29422		Single	Transition (with fully filled d-shell)	F		0	1	1		-5.92705	-2.44484	0.0317009	1.16711
qmof-9931f8f	boydwoo_str_m3_o8_o22_pcu_sym_270	Zn2C37H39N11O11	3.77239	6.03224	2.25985	-4.37693	-2.11707	-6.33356	-0.618025	COC1C2(C(N)C(N)C(C(N)C2)(C([O-])=O)C1)C([O-])=O	#VALUE!	-6.38333	-3.29658	COc1c(/N=N/c2ccc(C([O-])=O)cc2)ccc(C([O-])=O)c1	#VALUE!	-5.75839	-3.04934	COc1c(/N=N/c2c(N)cncc2)cc(N)nc1	#VALUE!	2.46182	0.201962		5.71554	3.45568	3.08675	0.826899	2.70906	0.449205		Single	Transition (with fully filled d-shell)	-		0	0	1		-5.75839	-3.29658	0.27385	0.475812
qmof-051793e	boydwoo_str_m3_o13_o15_pcu_sym_193	Zn2C48H18I10N2O8	3.7048	5.67646	1.97166	0.589837	2.5615	-5.85995	-3.39669	Ic1c2cc(-c3ccccc3)nc(I)c2cc(-c2ccccc2)n1	#VALUE!	-6.11135	-3.15671	[O-]C(c1c2ccc(I)c(I)c2c(C([O-])=O)c2ccc(I)c(I)c12)=O	#VALUE!	-6.10651	-2.83736	[O-]C(c1c(I)c2c(cc(C([O-])=O)c(I)c2c(I)c1)I)=O	#VALUE!	2.46326	0.491596		2.46326	0.491596	2.95464	0.98298	3.26915	1.29749		Single	Transition (with fully filled d-shell)	I		0	0	1		-5.85995	-3.39669	0.183484	0.308112
qmof-c0f392b	DIDDIE_FSR	Zn2C44H38N6O12	3.67847	6.15572	2.47725	-3.43277	-0.955519	-6.67302	-2.12303	[O-]C(c1ccc(Oc2ccc(C([O-])=O)cc2)cc1)=O	#VALUE!	-7.05436	-3.46524	n1ccc(/N=N/c2ccncc2)cc1	#VALUE!	-6.6472	-0.123757	CN(C)C=O	#VALUE!	3.18196	0.70471		4.54999	2.07274	3.58913	1.11187	6.52344	4.04619		Single	Transition (with fully filled d-shell)	-		0	0	1		-6.6472	-3.46524	0.49148	0.21323
qmof-d47a2d7	core_YUPSIM_freeONLY	Pr8C96H68N20O72	3.62976	5.91972	2.28996	-0.014802	2.27515	-6.02743	-2.15237	[NH3+]c1cc(C(=O)[O-])cc(C(=O)[O-])c1	#VALUE!	-6.2999	-2.02355	Nc1cc(C(=O)[O-])cc(C(=O)[O-])c1	#VALUE!	-8.5637	-2.71752	[N+]([O-])(=O)[O-]	#VALUE!	3.30991	1.01996		3.87507	1.58511	4.27635	1.9864	5.84618	3.55622		Single	Lanthanide	-		0	1	1		-6.02743	-2.71752	0.107718	0.912239
					1.97166																																			0.300103	0.711785

## Sheet: MOF vs Ligand (Quadruple)
MOF	Name	Formula	DFT					Ligand 1				Ligand 2				Ligand 3				Ligand 4				Bandgap	DIFF		Bandgap1	DIFF	Bandgap2	DIFF	Bandgap3	DIFF	Bandgap4	DIFF		Metal Core Type	Metal Type	Halogens		HCOOH	CH3OH	CH4		HOMO	LUMO	Diff
			EA	IP	Bandgap	HOMO	LUMO	HOMO	LUMO	SMILES	Ligand	HOMO	LUMO	SMILES	Ligand	HOMO	LUMO	SMILES	Ligand	HOMO	LUMO	SMILES	Ligand																							HOMO/IP	LUMO/EA
qmof-d5e77c0	boydwoo_str_m7_Zn_o4_o13_bcu_sym_100	Zn4C60F4H36N16	3.4898	5.6888	2.19901	-2.31348	-0.114475	-5.45632	-1.83837	c1[n-]ncc1-c1c(F)c2ccc(-c3cn[n-]c3)cc2cc1	#VALUE!	-6.27688	-4.28071	N1[N-]C=C([C]2C(C3C=N[N-]C=3F)[CH][C]=C3C(C[C]23)F)C=1 |^1:4,12,13,17|	#VALUE!	-5.45752	-1.7516	c1[n-]ncc1-c1cc2ccc(-c3c[n-]nc3)cc2cc1	#VALUE!	-5.54223	-1.49486	c1n[n-]cc1-c1c2CCc2c(-c2c[n-]nc2)c(F)c1	#VALUE!	1.17561	1.02339		3.61795	1.41894	1.99617	0.202831	3.70592	1.50692	4.04737	1.84836		Single	Transition (with fully filled d-shell)	-		0	1	1		-5.45632	-4.28071	0.232484	0.790907
qmof-e1625e5	boydwoo_str_m5_Al_o2_o2_sra_sym_20	Al4C60Cl4H27N5O30	3.67881	5.931	2.25219	-1.82523	0.426955	-7.14648	-3.19092			-6.60576	-4.20114			-6.15769	-3.56807			-7.06266	-3.07652			1.95655	0.295635		3.95556	1.70337	2.40462	0.152428	2.58963	0.337438	3.98614	1.73395		Single	Post-Transition	Cl		0	0	1		-6.15769	-4.20114	0.226696	0.522331
qmof-cafa193	boydwoo_str_m7_Zn_o25_o25_bcu_sym_151	Zn4C72H32N24O18	3.71371	6.03085	2.31715	-4.48891	-2.17177	-6.79017	-3.68774			-5.71282	-0.810573			-6.21348	-3.27383			-6.3097	-2.88008			2.02507	0.292074		3.10243	0.78528	4.90224	2.5851	2.93965	0.622501	3.42962	1.11247		Single	Transition (with fully filled d-shell)	-		0	0	1		-5.71282	-3.68774	0.318036	0.0259627
qmof-68d0826	boydwoo_str_m5_Al_o8_o21_sra_sym_26	Al4C47H24I6N4O20	3.62375	5.86596	2.24221	-3.233	-0.99079	-6.42774	-3.10267			-6.7699	-3.55215			-6.04104	-3.39443			-6.5558	-3.53906			2.48889	0.246679		3.32507	1.08286	3.21775	0.975536	2.64661	0.404396	3.01674	0.774525		Single	Post-Transition	I		0	1	1		-6.04104	-3.55215	0.175079	0.0715995
qmof-48537be	boydwoo_str_m5_Al_o8_o26_sra_sym_165	Al4C76F14H60N6O38	3.34935	5.72382	2.37447	-3.11319	-0.73872	-5.93589	-2.88623			-6.68225	-2.90901			-6.84968	-3.79901			-6.14534	-2.84389			2.13688	0.23759		3.04966	0.675189	3.77324	1.39877	3.05067	0.676196	3.30145	0.926976		Single	Post-Transition	F		1	1	1		-5.93589	-3.79901	0.212075	0.449665
qmof-320bc35	boydwoo_str_m5_Al_o3_o27_sra_sym_25	Al4C76F16H36N8O20	3.70279	5.95336	2.25057	-3.75376	-1.5032	-6.70426	-2.9234			-5.94466	-2.40794			-5.96828	-2.51507			-6.9262	-3.71321			2.23144	0.0191234		3.78086	1.53029	3.53672	1.28615	3.45321	1.20264	3.21299	0.962419		Single	Post-Transition	F		0	0	1		-5.94466	-3.71321	0.00870164	0.0104218
qmof-250bcfe	boydwoo_str_m4_Al_o17_o25_acs_sym_46	Al6C96H42N2O32	3.57446	6.02208	2.44761	-2.92227	-0.474661	-6.8702	-1.94714			-6.27315	-3.39122			-5.79663	-2.50963			-6.24763	-3.36809			2.40541	0.042207		4.92306	2.47545	2.88193	0.434319	3.287	0.839388	2.87954	0.431924		Single	Post-Transition	-		0	1	1		-5.79663	-3.39122	0.225449	0.183242
qmof-d535864	boydwoo_str_m7_Zn_o8_o25_bcu_sym_36	Zn4C72Cl17H27N20O12	3.72388	5.9108	2.18692	-3.99722	-1.8103	-5.87023	-1.39755	['Cl[C]1N=NC(=C1C#CC12C3C4C1C1(C2(C3C41C#CC1=C[N]N=C1)O)Cl)Cl', '', '', '']	#VALUE!	-6.49025	-3.71757	OC1=NN=C([C]1c1ccc(c(c1Cl)O)[N][N]c1cc(Cl)c(c(c1Cl)Cl)C1=C(Cl)N=N[C]1Cl)Cl	#VALUE!	-5.99554	-1.26691	OC1=NN=C[C]1C#CC12C3(O)C4C2(C2(C1(C3C42C#C[C]1C=NN=C1O)Cl)O)Cl	#VALUE!	-5.89663	-3.17345	Oc1cc(c(cc1[N][N]c1c(O)c(Cl)c(c(c1Cl)Cl)[C]1C(=NN=C1O)O)O)C1=C(Cl)[N]N=C1Cl	#VALUE!	2.15267	0.0342544		4.47268	2.28576	2.77268	0.585757	4.72863	2.54171	2.72318	0.53626		Single	Transition (with fully filled d-shell)	Cl		0	0	1		-5.87023	-3.71757	0.0405681	0.00631361
																																														0.179886	0.257555

## Sheet: MOF vs Ligand (Quintuple)
MOF	Name	Formula	DFT					Ligand 1				Ligand 2				Ligand 3				Ligand 4				Ligand 5				Bandgap	DIFF		Bandgap1	DIFF	Bandgap2	DIFF	Bandgap3	DIFF	Bandgap4	DIFF	Bandgap5	DIFF		Metal Core Type	Metal Type	Halogens		HCOOH	CH3OH	CH4
			EA	IP	Bandgap	HOMO	LUMO	HOMO	LUMO	SMILES	Ligand	HOMO	LUMO	SMILES	Ligand	HOMO	LUMO	SMILES	Ligand	HOMO	LUMO	SMILES	Ligand	HOMO	LUMO	SMILES	Ligand
qmof-c650339	boydwoo_str_m1_o9_o11_pcu_sym_64	Zn8C90H66N2O31	3.70836	5.72545	2.01709	-3.39259	-1.3755	-6.02098	-2.37839	CCOc1cc(OCC)ccc1-c1cc(C(=O)[O-])c(-c2ccccc2)cc1C(=O)[O-]	#VALUE!	-5.98096	-2.42443	CCOc1ccc(-c2cc(C(=O)[O-])c(-c3cccc(OCC)c3)cc2C(=O)[O-])cc1	#VALUE!	-7.61892	-3.81863	C(=O)([O-])/C=C/C(=C/C([O-])=O)/C#N	#VALUE!	-6.35778	-2.82892	C(=O)([O-])/C=C/C=C(/C([O-])=O)\OCC	#VALUE!	-6.36611	-2.45406	[O-]C(=O)c1cc(-c2ccccc2)c(C(=O)[O-])cc1-c1ccccc1	#VALUE!	2.16233	0.145235		3.6426	1.62551	3.55653	1.53944	3.80029	1.7832	3.52886	1.51176	3.91205	1.89495		Single	Transition (with fully filled d-shell)	-		0	0	1
[truncated: 4 more columns]

## Sheet: MOF vs Ligand (Sextuple)
MOF	Name	Formula	DFT					Ligand 1				Ligand 2				Ligand 3				Ligand 4				Ligand 5				Ligand 6				Bandgap	DIFF		Bandgap1	DIFF	Bandgap2	DIFF	Bandgap3	DIFF	Bandgap4	DIFF	Bandgap5	DIFF	Bandgap6	DIFF		Metal Core Type	Metal Type
			EA	IP	Bandgap	HOMO	LUMO	HOMO	LUMO	SMILES	Ligand	HOMO	LUMO	SMILES	Ligand	HOMO	LUMO	SMILES	Ligand	HOMO	LUMO	SMILES	Ligand	HOMO	LUMO	SMILES	Ligand	HOMO	LUMO	SMILES	Ligand
qmof-38471da	boydwoo_str_m4_Al_o6_o17_acs_sym_60	Al6C100H62N4O28	3.67147	5.76146	2.09	-2.18224	-0.092241	-6.52886	-2.94841	CCc1c(C#CC([O-])=O)c(CC)cc(C#CC([O-])=O)c1	#VALUE!	-5.8166	-2.91219	CCc1c(C#CC([O-])=O)c(NC)cc(C#CC([O-])=O)c1	#VALUE!	-5.26731	-2.4299	CNc1c2cc(C([O-])=O)cc3ccc4c(c23)c(cc(C([O-])=O)c4)c1	#VALUE!	-5.26962	-2.3186	CNc1c2cc(C([O-])=O)cc3cc(NC)c4c(c23)c(cc(C([O-])=O)c4)c1	#VALUE!	-6.78856	-3.17843	[O-]C(C#Cc1ccc(C#CC([O-])=O)cc1)=O	#VALUE!	-5.80825	-2.44124	[O-]C(c1cc2ccc3cc(C([O-])=O)cc4c3c2c(cc4)c1)=O	#VALUE!	2.08888	0.00111196		3.58045	1.49045	2.90441	0.814414	2.83741	0.747419	2.95102	0.861027	3.61014	1.52014	3.367	1.27701		Single	Post-Transition
[truncated: 8 more columns]
